# Supplementary material for: Homeostatic activation of aryl hydrocarbon receptor by dietary ligands dampens cutaneous allergic responses by controlling Langerhans cells migration
Source: eLife. 2023 May 16;12:e86413. doi: 10.7554/eLife.86413 (PMC10188110; doi:10.7554/eLife.86413)
Supplement: Figure 5—source data 1. [file elife-86413-fig5-data1.xlsx]

## Sheet: Papain treatment 
gene	baseMean	log2FoldChange	padj	symbol
ENSMUSG00000021702	299.542972648758	9.83284103816106	2.68146533831158e-25	Thbs4
ENSMUSG00000030116	173.43144561541	9.27835062966506	1.1534804467819e-22	Mfap5
ENSMUSG00000062515	31.7670354735201	9.12835967547202	2.35499363660512e-14	Fabp4
ENSMUSG00000024529	109.633377206401	9.08683313806993	9.89533415316219e-21	Lox
ENSMUSG00000022225	38.0760792884311	8.80611144196739	9.81609916811893e-13	Cma1
ENSMUSG00000029371	190.867377858705	8.80439414803342	4.69155409642897e-21	Cxcl5
ENSMUSG00000060594	21.0703088820528	8.75608694645478	9.77837781907445e-14	Layn
ENSMUSG00000017969	138.737273917371	8.68617674459652	4.77380606372546e-21	Ptgis
ENSMUSG00000020676	57.5790319245524	8.64176016173525	2.05123837317007e-14	Ccl11
ENSMUSG00000061816	23.5609064665668	8.31003678622142	1.40250060809716e-05	Myl1
ENSMUSG00000024011	360.136311445314	8.27332010542697	1.21598995628151e-66	Pi16
ENSMUSG00000026580	106.369181737927	8.19418236099703	1.09558419132166e-11	Selp
ENSMUSG00000026582	83.1386859517375	8.17689429359854	3.63618995936988e-17	Sele
ENSMUSG00000040809	154.661970718568	8.03025321195248	1.05151495288193e-10	Chil3
ENSMUSG00000041445	29.8897002457693	8.0183746927542	4.72675686843302e-12	Mmrn2
ENSMUSG00000040732	19.1061590293282	8.01029451291268	3.29089799783295e-11	Erg
ENSMUSG00000033825	22.1530527119539	7.96863167082186	2.22463672312516e-10	Tpsb2
ENSMUSG00000027318	27.3993054852428	7.84175920128144	1.5046827389144e-11	Adam33
ENSMUSG00000027656	49.6452096667847	7.81302864663095	9.32976139989321e-17	Ccn5
ENSMUSG00000010797	18.6511880478595	7.76235629032159	1.00705802912742e-10	Wnt2
ENSMUSG00000024173	17.9599825293139	7.75758363648271	8.47151919191247e-09	Tpsab1
ENSMUSG00000021130	19.6333857791779	7.6724282031398	4.11379081125403e-10	Galnt16
ENSMUSG00000073386	15.2001678902274	7.63110278799008	4.44819892700683e-09	9830107B12Rik
ENSMUSG00000026069	352.440098697619	7.57423890396089	1.07119816146409e-57	Il1rl1
ENSMUSG00000009185	14.8753564575921	7.55383045742543	2.76514293778323e-09	Ccl8
ENSMUSG00000001865	11.8260637612107	7.5523364580059	2.0458306475882e-08	Cpa3
ENSMUSG00000032484	9.48955106410573	7.53388026871314	3.35280856965602e-06	Ngp
ENSMUSG00000022548	235.514599006071	7.49972011789806	6.90707117980632e-31	Apod
ENSMUSG00000024678	14.6608873615231	7.49452158147084	1.4156096757314e-09	Ms4a4d
ENSMUSG00000037362	178.034923000253	7.4895527525324	8.63022446366262e-24	Ccn3
ENSMUSG00000026697	749.772016547737	7.48054712023479	1.01413892628856e-40	Myoc
ENSMUSG00000032925	17.7183031138327	7.46584701417023	2.74310254891224e-10	Itgbl1
ENSMUSG00000061068	47.565538902653	7.43024350324897	2.37924462493083e-11	Mcpt4
ENSMUSG00000037872	36.2233070734655	7.41746264774032	1.69243653242833e-13	Ackr1
ENSMUSG00000061100	10.7861594975698	7.4038121597386	6.88589066614073e-08	Retnla
ENSMUSG00000074677	21.3751686593067	7.38408643136431	3.69365824764124e-09	Sirpb1c
ENSMUSG00000000753	314.573589487213	7.38398573376702	1.1804550489276e-21	Serpinf1
ENSMUSG00000006221	8.70552721183947	7.29297013075452	2.21705042073071e-07	Hspb7
ENSMUSG00000026581	314.377295304022	7.29026707214544	9.40599646493867e-10	Sell
ENSMUSG00000078783	10.6421311197027	7.12206639586989	3.91713948171929e-07	Gm9733
ENSMUSG00000076609	10.5766368567269	7.08228533586084	5.12544868204776e-08	NA
ENSMUSG00000005716	8.62774004445828	7.06868535549949	0.00188874194642333	Pvalb
ENSMUSG00000028031	21.2030754475127	7.02748418509818	7.3936579306328e-10	Dkk2
ENSMUSG00000095788	6.03145928705423	7.00963312974711	4.90986120148178e-06	Sirpb1a
ENSMUSG00000030148	25.000400273372	7.00698036749677	1.71845961580602e-06	Clec4a2
ENSMUSG00000040522	6.73670543001611	7.00337450263356	2.75419753951622e-08	Tlr8
ENSMUSG00000052305	4079.93751579045	6.99390585511525	2.05948225062189e-08	Hbb-b1
ENSMUSG00000041559	137.017077571737	6.97601030061861	1.13734867751244e-16	Fmod
ENSMUSG00000036144	8.62474132041327	6.93530361269886	1.68764319347632e-08	Meox2
ENSMUSG00000069917	661.261557784794	6.91711407072446	1.12373084301522e-08	Hba-a2
ENSMUSG00000036446	94.8680920324933	6.91045905492312	7.50962314399708e-33	Lum
ENSMUSG00000028024	6.9385961315676	6.91043938859817	3.55615206205145e-08	Enpep
ENSMUSG00000027204	459.981522195529	6.85372365262245	2.37368281967502e-17	Fbn1
ENSMUSG00000022032	58.642881988336	6.78805327449818	2.33752225786709e-22	Scara5
ENSMUSG00000024675	49.0046939910755	6.77695745108937	4.84445825783779e-11	Ms4a4c
ENSMUSG00000020053	20.6527304174508	6.77432747189767	8.73147509898709e-09	Igf1
ENSMUSG00000043939	52.9801436220464	6.76998939926146	5.24679524229071e-08	A530064D06Rik
ENSMUSG00000026586	127.283487549366	6.75122003655642	1.46201265870978e-43	Prrx1
ENSMUSG00000046916	7.64419133723958	6.74058423678534	9.91478726161222e-07	Myct1
ENSMUSG00000069919	1627.23189419907	6.73755500061434	4.03667324779297e-14	Hba-a1
ENSMUSG00000025044	73.879334614418	6.72904844632274	3.08532668949194e-14	Msr1
ENSMUSG00000025784	218.967906136113	6.72749322559641	2.24987686226684e-33	Clec3b
ENSMUSG00000004359	5.1275600610928	6.72084971372988	1.73728407976721e-05	Spic
ENSMUSG00000020061	9.73408122799899	6.72058085141254	6.45207695854052e-07	Mybpc1
ENSMUSG00000028751	7.33463296006343	6.712754878474	1.20958396005742e-07	Pla2g2e
ENSMUSG00000069516	753.533842411666	6.70947970582747	5.71488067210942e-16	Lyz2
ENSMUSG00000026712	110.512201600859	6.6850076020157	1.98616552342714e-14	Mrc1
ENSMUSG00000078190	5.95983909630093	6.67565217292734	1.34642896005002e-06	Dnm3os
ENSMUSG00000072941	267.343079469791	6.67356269632171	2.06447481808125e-33	Sod3
ENSMUSG00000026043	1259.82736127343	6.66556598557605	2.4021499469832e-27	Col3a1
ENSMUSG00000031230	8.67440883767849	6.65540420892628	1.55191992067423e-07	Fgf16
ENSMUSG00000038591	5.32307610229734	6.65467285966334	7.62176927431482e-07	Colec10
ENSMUSG00000056328	6.44685945834755	6.65042477807352	3.08875163180998e-05	Myh1
ENSMUSG00000032725	11.5064519129576	6.64536800356017	7.83827868845774e-08	Folr2
ENSMUSG00000109036	4.83020616830299	6.63424429594954	1.33988709493241e-05	NA
ENSMUSG00000040907	19.6864510735805	6.62244436535104	4.96767685659416e-10	Atp1a3
ENSMUSG00000021943	23.2177966672223	6.6191298630908	7.42400935683844e-08	Gdf10
ENSMUSG00000096719	12.2622787092936	6.60144651422395	3.30865380393993e-06	Mrgpra2b
ENSMUSG00000022651	84.0805009289535	6.58784602658312	4.45390393241142e-09	Retnlg
ENSMUSG00000031250	9.27023714490556	6.56672365604712	4.11260670766155e-06	Tnmd
ENSMUSG00000029372	4.39231862435047	6.5534590350589	9.742580812748e-05	Ppbp
ENSMUSG00000042436	14.5693728085758	6.55158831408505	9.50595726948025e-08	Mfap4
ENSMUSG00000026574	148.97097520113	6.5459725998749	1.31402660366348e-46	Dpt
ENSMUSG00000029231	220.572549138659	6.54453986708098	4.59666562428905e-30	Pdgfra
ENSMUSG00000042265	498.687995110596	6.531064643435	3.53347553708439e-11	Trem1
ENSMUSG00000052212	23.7906486251768	6.51536524282408	4.64947265179298e-11	Cd177
ENSMUSG00000078616	4.20714458189144	6.50277420882729	0.000323750345038502	Trim30c
ENSMUSG00000000805	6.96599598063077	6.49064347176869	1.3129469577741e-06	Car4
ENSMUSG00000032125	21.2688154693437	6.48216904692956	9.40088634598851e-11	Robo4
ENSMUSG00000029661	1063.57540978922	6.47759472993171	1.92572770384923e-26	Col1a2
ENSMUSG00000031253	9.13580842954123	6.46397239507378	1.15501807098192e-07	Srpx2
ENSMUSG00000036596	7.98934247550221	6.46114533773781	9.91478726161222e-07	Cpz
ENSMUSG00000013936	4.8055215849035	6.45592905798615	0.00122284938855973	Myl2
ENSMUSG00000013974	99.0851458075274	6.45183480447292	1.99462330657079e-11	Mcemp1
ENSMUSG00000031283	27.7269410539037	6.44820889049875	7.47415793795145e-12	Chrdl1
ENSMUSG00000021388	98.59136964838	6.44772694579319	5.32390887349268e-31	Aspn
ENSMUSG00000043903	5.6437538021413	6.4384225715001	1.21973710393327e-06	Zfp469
ENSMUSG00000053062	9.8546212699309	6.43502533513226	6.71871466523413e-07	Jam2
ENSMUSG00000074793	17.1697596821188	6.43201545408972	3.66608768051843e-08	Hspa12b
ENSMUSG00000097754	15.9269416590381	6.42949473235381	5.17451475567492e-08	Ptgs2os2
ENSMUSG00000031722	196.330742849128	6.42694994471784	5.16072795441223e-10	Hp
ENSMUSG00000050069	16.2162732117986	6.4116514520446	6.147721558864e-08	Grem2
ENSMUSG00000025889	17.7035256646962	6.40935212355881	3.84071075425641e-09	Snca
ENSMUSG00000026365	48.5699435829419	6.40602720304055	4.16681395994548e-18	Cfh
ENSMUSG00000073940	318.630619123778	6.39263536801771	1.28413978746937e-07	Hbb-bt
ENSMUSG00000030144	513.23039112345	6.38400687193221	9.40578716742064e-11	Clec4d
ENSMUSG00000029322	100.308296741475	6.37693024866276	4.20028427662717e-13	Plac8
ENSMUSG00000024340	3.88502969452473	6.37504110839432	0.000149064150603137	Btnl2
ENSMUSG00000051682	15.6351906159868	6.36406703742272	2.82079723196585e-08	Treml4
ENSMUSG00000027559	15.7884947797283	6.35362798537889	1.10782536857955e-05	Car3
ENSMUSG00000021268	25.0386102495931	6.34162655092195	6.80490016627806e-13	Meg3
ENSMUSG00000029096	95.9327953666317	6.33397093747477	7.75444633867668e-33	Htra3
ENSMUSG00000048387	11.9163720857248	6.33115737340967	2.75363370859814e-07	Osr1
ENSMUSG00000027661	5.68997115345704	6.33102150524874	3.80500038644312e-07	Slc2a10
ENSMUSG00000030413	26.872841768312	6.29897749877079	4.40741229340649e-11	Pglyrp1
ENSMUSG00000028859	548.719114920902	6.29763837140209	4.69989476959934e-09	Csf3r
ENSMUSG00000007805	7.63267879051606	6.29648275390232	6.64831298354445e-07	Twist2
ENSMUSG00000024620	46.0167629925821	6.29566489176491	2.61179840733501e-22	Pdgfrb
ENSMUSG00000102051	15.3409397322757	6.28985440196786	4.70806427762997e-09	Ly6a2
ENSMUSG00000030187	29.7850360218532	6.28951575852392	1.33352776164289e-12	Klra2
ENSMUSG00000062329	6.65272034056524	6.27762471620036	2.56866813081862e-06	Cytl1
ENSMUSG00000027500	21.760236075744	6.27502841735302	2.00683983087547e-08	Stmn2
ENSMUSG00000059632	5.13212600293402	6.265854366631	0.000426745317888128	Krtap8-1
ENSMUSG00000027208	14.2753567772052	6.26092018801208	1.47761767469807e-07	Fgf7
ENSMUSG00000095028	27.2630605490793	6.25593864946735	9.12096280826202e-05	Sirpb1b
ENSMUSG00000028883	58.8886965401191	6.23816024832429	8.82423503751831e-25	Sema3a
ENSMUSG00000025270	191.373771871672	6.23740498615292	2.28524511762807e-17	Alas2
ENSMUSG00000019929	1882.87584232347	6.23371152992881	1.31297068709582e-43	Dcn
ENSMUSG00000023992	7.90478818389427	6.21727472696885	9.52776381112191e-07	Trem2
ENSMUSG00000032334	84.9980531397804	6.21724915538269	2.79216757564681e-33	Loxl1
ENSMUSG00000040328	3.44082862820436	6.2072989586731	0.00013048371496799	Olfr56
ENSMUSG00000059173	3.79664977622113	6.2025692910443	2.6365028797047e-05	Pde1a
ENSMUSG00000074896	188.156061072666	6.2024073038134	1.00980977931532e-09	Ifit3
ENSMUSG00000043740	18.5117758510109	6.19456195692589	2.77287957797729e-08	B430306N03Rik
ENSMUSG00000029675	169.308111762953	6.19065740238321	5.86789536773676e-26	Eln
ENSMUSG00000032271	9.92458401083545	6.17422329923965	9.21303141797021e-07	Nnmt
ENSMUSG00000052270	65.7686465195284	6.17334947163781	3.36409291033154e-05	Fpr2
ENSMUSG00000019122	182.748557491496	6.16644254844373	4.59483047958644e-10	Ccl9
ENSMUSG00000042379	3.32836376640866	6.16198116759079	0.000459808345356571	Esm1
ENSMUSG00000001506	1070.89353726801	6.15796283860836	1.81079254911873e-42	Col1a1
ENSMUSG00000069515	27.7095083410204	6.15504496783774	1.53787763177596e-14	Lyz1
ENSMUSG00000015340	98.6042663826251	6.14986770027511	1.58622294667033e-12	Cybb
ENSMUSG00000097451	10.8835573974171	6.14954411905719	1.09165943337272e-06	NA
ENSMUSG00000084956	13.4253709793358	6.14199504476233	1.26509978531356e-06	NA
ENSMUSG00000056492	50.0383458355555	6.13983267001006	8.01523431367375e-19	Adgrf5
ENSMUSG00000028356	8.37151588919867	6.13313858622787	1.3563751780855e-06	Ambp
ENSMUSG00000021319	102.520052784419	6.13300690912983	2.40243219856317e-34	Sfrp4
ENSMUSG00000067297	25.874545039041	6.11907083210721	1.25230858329373e-10	Ifit1bl2
ENSMUSG00000009378	5.50074712100577	6.11524283809776	9.41974887912811e-06	Slc16a12
ENSMUSG00000079227	69.6095237201942	6.11295846565482	4.31157229267151e-14	Ccr5
ENSMUSG00000027474	21.1935047494512	6.0880253322	1.22127541263126e-09	Ccm2l
ENSMUSG00000078780	12.0349318580105	6.08411996109475	0.00838068464253066	Gm5150
ENSMUSG00000030142	898.840011425599	6.06893734988185	2.57360748303226e-11	Clec4e
ENSMUSG00000069763	20.1224445448031	6.06792863378132	5.13622887291028e-09	Tmem100
ENSMUSG00000055782	3.31926358069757	6.06317328512271	1.5247151561784e-05	Abcd2
ENSMUSG00000032323	9.58452200346587	6.05971066777059	2.25499029543421e-06	Cyp11a1
ENSMUSG00000039167	6.29915272213761	6.04656722364282	5.83177651668741e-06	Adgrl4
ENSMUSG00000037095	275.45884041758	6.04064836684904	1.35900227812647e-11	Lrg1
ENSMUSG00000097888	9.13017891572114	6.03815194203716	8.10328388358334e-07	Gm26682
ENSMUSG00000022126	2075.44956656296	6.03616993938294	2.45191580716682e-09	Acod1
ENSMUSG00000047798	208.604246619417	6.03511022160666	1.19761304395907e-09	Cd300lf
ENSMUSG00000058794	17.5242098232899	6.0296854797415	1.47668676987565e-09	Nfe2
ENSMUSG00000005338	133.714325807488	6.02866177534321	1.26592380743264e-40	Cadm3
ENSMUSG00000015947	43.9498403546587	6.02851087877901	0.000685699134768912	Fcgr1
ENSMUSG00000021903	55.9769106117393	6.02509719982494	1.96177307449835e-21	Galnt15
ENSMUSG00000041797	8.6661312663138	6.01834870991992	8.75910444416902e-06	Abca9
ENSMUSG00000022584	110.021727851795	6.01318970927989	1.31593035523645e-07	Ly6c2
ENSMUSG00000024730	3.28578744337318	6.00923054670858	0.000281430466893914	Ms4a8a
ENSMUSG00000029669	7.71543176608961	5.99837783684717	1.73614156603522e-06	Tspan12
ENSMUSG00000045551	69.1095738119044	5.99205751506591	1.11514340698135e-05	Fpr1
ENSMUSG00000027360	1240.1086272738	5.99205155180335	4.07592414617895e-12	Hdc
ENSMUSG00000062488	95.6899995028367	5.99023274527519	3.42017154309816e-05	Ifit3b
ENSMUSG00000024420	25.779853538094	5.98526828780016	5.88516644788724e-11	Zfp521
ENSMUSG00000026208	11.2650275421865	5.97986390907213	3.44461186605445e-05	Des
ENSMUSG00000004655	241.296082037229	5.97657909828665	1.00766319391685e-24	Aqp1
ENSMUSG00000058755	156.613445323397	5.97458884640276	2.19633678894063e-17	Osm
ENSMUSG00000049130	242.349390065243	5.96346212520043	4.81730016473547e-08	C5ar1
ENSMUSG00000053063	8.98060165963169	5.95607200603794	4.40850246871417e-06	Clec12a
ENSMUSG00000029778	3.80166493724601	5.95196496081349	1.69472668264681e-05	Adcyap1r1
ENSMUSG00000034810	5.7607468489823	5.94954646304576	9.61548360360924e-06	Scn7a
ENSMUSG00000057098	31.7380590796083	5.92558986425282	3.01489502367476e-17	Ebf1
ENSMUSG00000009633	182.295995732593	5.91937419473846	8.66111772501691e-15	G0s2
ENSMUSG00000031377	5.31117827265033	5.91119100153582	2.65099317918517e-05	Bmx
ENSMUSG00000029379	168.095273753873	5.91077677175669	7.12983775101886e-15	Cxcl3
ENSMUSG00000035352	2.78010575911412	5.87012788299599	0.000115255340076463	Ccl12
ENSMUSG00000048572	3.32627728241714	5.86372122363666	1.5213700541165e-05	Tmem252
ENSMUSG00000031444	107.33055101889	5.86230414461233	7.26186724195519e-08	F10
ENSMUSG00000078122	45.6336171589377	5.85684588298934	4.93394531519157e-06	F630028O10Rik
ENSMUSG00000004814	8.27487890497313	5.8507156905315	2.7152620963727e-06	Ccl24
ENSMUSG00000079105	3.86427772491488	5.84231110658099	8.11780956705448e-05	C7
ENSMUSG00000078763	84.7304181497251	5.84227517509539	4.91818022273372e-06	Slfn1
ENSMUSG00000024885	16.6017125363997	5.83368628991645	7.90090864188631e-10	Aldh3b1
ENSMUSG00000000204	3599.53337900615	5.82275701727053	1.10016215068972e-07	Slfn4
ENSMUSG00000029553	4.39134398238727	5.81550565608423	0.000184738261919991	Tfec
ENSMUSG00000029223	8.85402746446087	5.81222180232104	3.02313194122741e-06	Uchl1
ENSMUSG00000036103	24.6873839905834	5.80289723074933	2.05716074289074e-14	Colec12
ENSMUSG00000020312	16.0034408643981	5.79267124172178	3.51107410183768e-11	Shc2
ENSMUSG00000025877	65.9585893771997	5.79020841683761	3.33072461343111e-07	Hk3
ENSMUSG00000041261	4.20366362756443	5.78083102698421	2.16188668219494e-05	Car8
ENSMUSG00000016024	371.535540763118	5.78074620753973	2.0439588851097e-23	Lbp
ENSMUSG00000056706	5.43709138113741	5.78004230966214	0.0017896244181131	Krtap7-1
ENSMUSG00000041754	20.6289205756605	5.76842531680694	4.23236100802336e-10	Trem3
ENSMUSG00000040612	9.57633251204457	5.76793955149392	1.37777422265174e-06	Ildr2
ENSMUSG00000043300	4.87225516464637	5.76477733192441	5.48046077257665e-06	B3galnt1
ENSMUSG00000026177	247.32091098505	5.74955207362423	3.45653115341413e-12	Slc11a1
ENSMUSG00000021098	2.71971390855531	5.74167884104004	0.000279365303805478	4930447C04Rik
ENSMUSG00000061723	29.4296674287104	5.73987054223583	3.14574245294441e-06	Tnnt3
ENSMUSG00000067235	64.5939407291281	5.70940631937207	7.05637811379558e-08	H2-Q10
ENSMUSG00000037206	24.2005162314526	5.69571740819869	2.45867898060482e-12	Islr
ENSMUSG00000024677	30.7980551488821	5.69539424416699	2.9564088613172e-11	Ms4a6b
ENSMUSG00000029373	23.2219806189363	5.68437055646042	3.38817591754991e-11	Pf4
ENSMUSG00000043832	21.6272863719542	5.68112608610295	1.52164897692315e-11	Clec4a3
ENSMUSG00000101389	48.6655987603188	5.67126998160241	3.13821344278603e-16	Ms4a4a
ENSMUSG00000053318	2.50513937229894	5.66514066230433	0.00052457720700573	Slamf8
ENSMUSG00000054690	33.1799063290109	5.65182942962688	1.30560869700045e-12	Emcn
ENSMUSG00000034641	58.259786526696	5.64916892478294	1.18297542308662e-07	Cd300ld
ENSMUSG00000031990	7.55742555288081	5.64798407021524	7.46922626568743e-06	Jam3
ENSMUSG00000028116	3.31373922121132	5.62952721614902	0.000864390044764757	Myoz2
ENSMUSG00000060311	2.73573622573911	5.62768555784212	0.000587517315557128	Mucl1
ENSMUSG00000024164	507.782428831413	5.62560972852752	7.42931140185655e-30	C3
ENSMUSG00000000693	28.4026162964349	5.60709357159908	9.5209692750651e-18	Loxl3
ENSMUSG00000030468	13.785372436409	5.60496824197836	1.89808177545721e-06	Siglecg
ENSMUSG00000101585	4.59689515666771	5.58927347756709	6.61391715542382e-05	1600010M07Rik
ENSMUSG00000022438	40.9308488759262	5.58463020114358	2.81360055460675e-16	Parvb
ENSMUSG00000044749	6.14288495012864	5.58263325345678	1.79877048675443e-05	Abca6
ENSMUSG00000031520	3.30718951244663	5.57678854648533	0.000784520033441119	Vegfc
ENSMUSG00000030411	8.84240159152584	5.55877262520962	1.09422746561985e-05	Nova2
ENSMUSG00000034164	13.1745049734495	5.55603354338704	4.84296085626189e-07	Emid1
ENSMUSG00000063193	21.6474133883024	5.54178275498261	1.05583950368893e-09	Cd300lb
ENSMUSG00000056486	5.75539388238735	5.54106152168329	3.53344259872734e-05	Chn1
ENSMUSG00000039264	7.39882623128889	5.53055973984478	0.000736716821530644	Gimap3
ENSMUSG00000031486	92.4421728154792	5.52768545579138	5.54859761408797e-15	Adgra2
ENSMUSG00000062960	73.962511240727	5.52466311427215	2.93267298495644e-19	Kdr
ENSMUSG00000046245	29.7757521280271	5.51565695263427	9.72215703676523e-06	Pilra
ENSMUSG00000071068	23.233750827818	5.50256343755495	1.22127541263126e-09	Treml2
ENSMUSG00000035004	126.893536343488	5.49216896654099	1.09095307905783e-13	Igsf6
ENSMUSG00000039883	5.03222456759532	5.48963614552455	3.92849842211632e-05	Lrrc17
ENSMUSG00000031972	78.61531836055	5.4870102772162	6.19769514353119e-08	Acta1
ENSMUSG00000031871	113.626953501966	5.48277723742044	3.15026151811844e-31	Cdh5
ENSMUSG00000030427	30.3902372883919	5.47938249127136	3.33772301287146e-06	Lilra6
ENSMUSG00000019936	2.31230822984369	5.47211712170157	0.000965130119002417	Epyc
ENSMUSG00000072596	4.51242925064254	5.47047768188545	0.000145545324684242	Ear2
ENSMUSG00000073489	296.418866715776	5.46765454444126	1.74897042684317e-12	Ifi204
ENSMUSG00000033777	78.6783816231297	5.46494120355941	5.69540027873009e-12	Tlr13
ENSMUSG00000029304	250.225343191109	5.45528305945359	4.11604143770303e-09	Spp1
ENSMUSG00000074272	31.8350782658049	5.4467808009899	2.77340482019992e-16	Ceacam1
ENSMUSG00000111167	5.49457286410132	5.43915032405798	0.000474588338278596	NA
ENSMUSG00000040118	18.0650462295634	5.43405769708243	9.92524740147922e-12	Cacna2d1
ENSMUSG00000005800	44.4456839776797	5.42955370411689	8.49685414949566e-06	Mmp8
ENSMUSG00000039084	9.50856074755816	5.42811799846349	1.90858677222277e-05	Chad
ENSMUSG00000019278	17.5450240117491	5.42436749295354	2.40456365459195e-11	Dpep1
ENSMUSG00000105366	2.42251069980902	5.42147837890988	0.00637213307295909	NA
ENSMUSG00000018930	131.180071538559	5.41687056091678	6.09816525659000e-11	Ccl4
ENSMUSG00000079597	29.7196071756555	5.41153103838214	0.0059667828490081	Cstdc4
ENSMUSG00000030351	7.38324403108731	5.40600420260042	8.64002633732852e-05	Tspan11
ENSMUSG00000096140	1.98740155183403	5.39470118951254	0.00406511300246677	Ankrd66
ENSMUSG00000038067	46.5137064191341	5.38650143965789	8.67432708806065e-19	Csf3
ENSMUSG00000024053	539.806229792222	5.38309645315216	8.69840013892174e-15	Emilin2
ENSMUSG00000090084	3.64969597433816	5.38296950729859	0.000200063744714511	Srpx
ENSMUSG00000036545	65.4085456421877	5.38202693096952	3.80179383152513e-28	Adamts2
ENSMUSG00000022534	180.007654432507	5.37807489191536	4.66942001734405e-06	Mefv
ENSMUSG00000026579	53.8445237160936	5.37774650643154	2.05657688428239e-07	F5
ENSMUSG00000068697	2.57641377336301	5.37616101093065	0.000754813689802343	Myoz1
ENSMUSG00000020010	6.4650118861421	5.37496035591946	0.0002805282413129	Vnn3
ENSMUSG00000023868	4.27467174407846	5.37367749548867	0.000185398427059	Pde10a
ENSMUSG00000018339	113.386120815196	5.36229468510184	3.06088389201142e-07	Gpx3
ENSMUSG00000025804	302.181520273945	5.35694263185497	3.4547568210463e-08	Ccr1
ENSMUSG00000040283	6.30475079040676	5.3544106065338	8.86624765640132e-05	Btnl9
ENSMUSG00000027833	4.43244870763385	5.35078149758468	0.000150258294430224	Shox2
ENSMUSG00000026065	2.73850773494331	5.34623327236966	0.00233305924416187	Slc9a4
ENSMUSG00000052749	72.0237552821513	5.3438883193154	5.69275998800409e-11	Trim30b
ENSMUSG00000032419	4.07346516680818	5.33637055737857	0.000118109803644296	Tbx18
ENSMUSG00000022579	5.10447866963855	5.33633249470698	0.000118368307935347	Gpihbp1
ENSMUSG00000022816	507.563891927621	5.32441670100159	1.02332822379469e-23	Fstl1
ENSMUSG00000037820	694.355153079558	5.32261571530563	1.2238607139008e-13	Tgm2
ENSMUSG00000048120	354.07798358153	5.31686812165986	3.59620472992667e-12	Entpd1
ENSMUSG00000052248	3.19594540899524	5.31590325272093	0.000693893066256133	Zeb2os
ENSMUSG00000112023	1423.59371246232	5.29683136430244	2.37924462493083e-11	Lilr4b
ENSMUSG00000031849	100.585845765037	5.29087826045278	4.147171587199e-24	Comp
ENSMUSG00000029718	203.692669415271	5.2891701997809	2.7649172148068e-45	Pcolce
ENSMUSG00000020826	3.28199149984498	5.27530530374341	0.000299298202531586	Nos2
ENSMUSG00000030865	13.9189561423522	5.27185277275454	2.31635494897266e-06	Chp2
ENSMUSG00000008845	29.9833169531995	5.27102491498373	1.07860879319035e-14	Cd163
ENSMUSG00000038156	48.5242444455794	5.26070150217526	2.55260016755875e-18	Spon1
ENSMUSG00000027398	2246.22175134212	5.25603970648639	1.2375562807924e-12	Il1b
ENSMUSG00000022371	93.9318688537412	5.2517791233093	1.88262211854536e-24	Col14a1
ENSMUSG00000019890	28.8975484476158	5.25112912123457	6.66061712265699e-15	Nts
ENSMUSG00000028755	6.64521492211732	5.2460221152171	0.00073468898468828	Cda
ENSMUSG00000022150	160.561772351753	5.24401347233784	7.5822841442118e-43	Dab2
ENSMUSG00000049307	4.50198371057028	5.24249012623781	0.000157129229315571	Fut4
ENSMUSG00000033196	5.59224297645992	5.23860004277828	0.00186691748805647	Myh2
ENSMUSG00000038193	6.48931307742842	5.23836215805006	5.48750825365586e-05	Hand2
ENSMUSG00000052974	71.4097355921943	5.23055302479063	1.156177706503e-09	Cyp2f2
ENSMUSG00000003617	70.0786347789153	5.22277926504381	2.08975414686387e-22	Cp
ENSMUSG00000030562	6.10504622452344	5.22085732567359	3.49732138127682e-05	Nox4
ENSMUSG00000006386	30.5657041218914	5.22080612530168	7.94274787129891e-15	Tek
ENSMUSG00000039109	140.081094925258	5.206597227679	7.27721345918271e-06	F13a1
ENSMUSG00000006403	59.2064003677057	5.20601091695584	2.47831428450178e-26	Adamts4
ENSMUSG00000026814	118.614277606734	5.19736128985085	3.35357144742088e-32	Eng
ENSMUSG00000020357	173.087070890792	5.19338711042086	3.90631558933501e-10	Flt4
ENSMUSG00000021708	6.33414774731202	5.18880202645411	6.09681983919989e-05	Rasgrf2
ENSMUSG00000051439	1508.07016868992	5.18373018651648	1.26864415397788e-15	Cd14
ENSMUSG00000047867	51.0261578629595	5.17511395512376	5.23565741031593e-15	Gimap6
ENSMUSG00000027801	1.71602575900532	5.17417940295028	0.00910387780927636	Tm4sf4
ENSMUSG00000000318	6.14656615218475	5.17027016775089	0.000837081053398902	Clec10a
ENSMUSG00000041741	3.05916783427304	5.16629209723295	0.00140040387617707	Pde3a
ENSMUSG00000026872	198.965439986657	5.16541516252677	1.01526154922471e-13	Zeb2
ENSMUSG00000059657	37.8843278147826	5.15793926111648	6.06549245834987e-08	Stfa2
ENSMUSG00000085295	2.91525849149522	5.15346674202845	0.00115111058305192	NA
ENSMUSG00000047497	4.22351560871819	5.15085466635404	0.000460092453556359	Adamts12
ENSMUSG00000031465	11.7047055700217	5.14350386532516	1.2062652364057e-06	Angpt2
ENSMUSG00000021390	9.17919633576647	5.13012884633132	5.27289767604923e-05	Ogn
ENSMUSG00000054641	184.432473505383	5.12785957757432	3.1525182379127e-09	Mmrn1
ENSMUSG00000038210	4.03517816348705	5.12768885985846	0.00150745330117353	Hoxa11
ENSMUSG00000049103	92.5304903092468	5.12377470556967	6.83159120156519e-13	Ccr2
ENSMUSG00000033191	109.952644813985	5.12081308213293	8.1939099034831e-16	Tie1
ENSMUSG00000028111	71.3712686311858	5.12005759368892	1.08055495518302e-29	Ctsk
ENSMUSG00000004609	127.035749493398	5.10552445109177	7.37757784263966e-06	Cd33
ENSMUSG00000000982	207.783602371378	5.10263943176582	6.13330159259422e-11	Ccl3
ENSMUSG00000062563	4.20772511698108	5.08871008248794	0.000988358368608511	Cys1
ENSMUSG00000112148	531.542532332708	5.08707528479194	2.6809727311934e-13	Lilrb4a
ENSMUSG00000051041	3.06543951629359	5.07146382006883	0.00203230264198209	Olfml1
ENSMUSG00000043263	47.2137714946521	5.06779881667484	5.25590161429273e-08	Ifi209
ENSMUSG00000007122	2.50445565685945	5.05899449923748	0.00387643402700576	Casq1
ENSMUSG00000026890	3.88984280616895	5.05792873655252	0.00170218679145121	Lhx6
ENSMUSG00000044229	4.33859755429061	5.05788375068058	0.00126439743074831	Nxpe4
ENSMUSG00000037849	10.7073652623133	5.05425375786391	4.06934994829021e-06	Ifi206
ENSMUSG00000057378	5.03454154861295	5.05068354900854	0.00137719058717176	Ryr3
ENSMUSG00000052631	5.31621720039653	5.04849507306935	0.000134595594323796	Sh2d6
ENSMUSG00000047880	3.52744177397009	5.04761875380224	0.00135778622717523	Cxcr5
ENSMUSG00000104348	59.6891621028209	5.04199243820983	2.64432913063221e-06	NA
ENSMUSG00000052160	59.4758447541383	5.03667935722538	1.09330304723357e-21	Pld4
ENSMUSG00000033544	2.52587303794488	5.03591732983493	0.0030466993363992	Angptl1
ENSMUSG00000030577	4.04759166360412	5.01964169572671	0.000582806961034001	Cd22
ENSMUSG00000034997	7.10136895465917	5.01913257256021	4.37253059463563e-05	Htr2a
ENSMUSG00000042453	92.1407263123945	5.01581381462163	6.98505106196404e-20	Reln
ENSMUSG00000046491	3.70247890590469	5.01057553468641	0.000928913974209403	C1qtnf2
ENSMUSG00000032181	13.369413677627	5.00949718086941	2.29891805906272e-08	Scg3
ENSMUSG00000044583	14.7245409451795	5.00584793019495	4.77024378951812e-08	Tlr7
ENSMUSG00000078817	11.1568587147876	4.99798502747454	1.65982578462556e-06	Nlrp12
ENSMUSG00000020717	175.807635603625	4.99753081079284	2.13148621881481e-20	Pecam1
ENSMUSG00000020641	396.948129598039	4.99008589410264	7.56891030799604e-10	Rsad2
ENSMUSG00000090667	1.86299357465109	4.98900821914139	0.00199012328345975	Gm765
ENSMUSG00000015354	95.0848585429234	4.98794841146794	2.99304280519097e-30	Pcolce2
ENSMUSG00000049988	78.800124348952	4.98038987269188	5.10594779060216e-11	Lrrc25
ENSMUSG00000024076	19.0709748305708	4.96368219633872	1.02585944180625e-09	Vit
ENSMUSG00000024680	2.10273449828201	4.96037952336799	0.00167183106969428	Ms4a2
ENSMUSG00000025491	151.365770604481	4.95161739052911	1.35080452841996e-16	Ifitm1
ENSMUSG00000049685	180.174226072885	4.94320666581042	6.68339135605251e-10	Cyp2g1
ENSMUSG00000037731	293.643774115041	4.94142763506132	5.43674820703345e-11	Themis2
ENSMUSG00000014603	2.67014358379965	4.93957989403456	0.00614425156963142	Alx3
ENSMUSG00000030249	3.74017467474472	4.93623936438085	0.000655609463144792	Abcc9
ENSMUSG00000094686	287.513156352123	4.93564068099702	3.74845238951303e-07	Ccl21a
ENSMUSG00000046805	278.396944324677	4.93510436096029	6.54328753578392e-13	Mpeg1
ENSMUSG00000003484	169.912185997602	4.92460821649343	1.85689076317942e-10	Cyp4f18
ENSMUSG00000073902	28.1951218302201	4.91791962937371	0.000400163975794594	NA
ENSMUSG00000048126	186.817317281817	4.91755171817787	8.32100996472697e-12	Col6a3
ENSMUSG00000018927	366.312766193754	4.90668505896628	1.11742636913026e-20	Ccl6
ENSMUSG00000041827	151.662657653056	4.90291231327785	8.43475339096758e-09	Oasl1
ENSMUSG00000056529	311.365209005748	4.90050361430249	1.41973226360207e-11	Ptafr
ENSMUSG00000022306	3.65505933355545	4.88338209226851	0.00115320624072285	Zfpm2
ENSMUSG00000079419	56.1002808883919	4.87313429195099	3.45984019622076e-15	Ms4a6c
ENSMUSG00000046167	16.008308211978	4.87209044169263	4.32534821310064e-06	Gldn
ENSMUSG00000006014	2477.48555566333	4.86502741433965	3.71700799897268e-06	Prg4
ENSMUSG00000003477	2.76084313287889	4.85830075744527	0.00194074849659931	Inmt
ENSMUSG00000030470	4.98330477044912	4.85165960832267	0.00323801258925474	Csrp3
ENSMUSG00000032496	4.48866409043701	4.8482044055217	0.00186256491592611	Ltf
ENSMUSG00000021536	4.8671474047998	4.84382435461282	0.000167062818900166	Adcy2
ENSMUSG00000042254	53.7048028196159	4.84318926168273	1.72873358293436e-26	Cilp
ENSMUSG00000050276	4.37043627288434	4.84294286405933	0.000581546659297245	Mrgprg
ENSMUSG00000009281	24.8833939512477	4.83994808698952	1.10514704354343e-12	Rarres2
ENSMUSG00000045092	70.8773461662798	4.83713700818945	5.82977260023382e-23	S1pr1
ENSMUSG00000023959	40.5967734728669	4.82470537843151	2.83695897537601e-17	Clic5
ENSMUSG00000034205	45.2014866587725	4.81644925382548	1.07282624978372e-21	Loxl2
ENSMUSG00000044017	82.5286306794305	4.81411752384341	5.9707950349152e-26	Adgrd1
ENSMUSG00000025330	21.0623830811211	4.80990100223661	1.83204505400601e-11	Padi4
ENSMUSG00000059412	19.0955883362331	4.79932841484214	5.55443359097325e-12	Fxyd2
ENSMUSG00000030178	2.3684451404997	4.79286260090115	0.00811202375216793	Klra13-ps
ENSMUSG00000034911	19.613675081001	4.78549184875768	5.2880616746559e-09	Ushbp1
ENSMUSG00000040046	10.3353046201282	4.78334134067228	3.34255173255931e-06	Tph1
ENSMUSG00000031595	2.57036940120185	4.77626840471359	0.00587374491016002	Pdgfrl
ENSMUSG00000079339	8.78804487818762	4.77497728806373	0.00031123369554282	Ifit1bl1
ENSMUSG00000027322	5.7778381527913	4.77201983348527	0.000442066841357338	Siglec1
ENSMUSG00000018845	8.43555273493101	4.76931752817093	2.81742582325907e-05	Unc45b
ENSMUSG00000001131	418.534230537141	4.7597830146383	1.23231364547095e-60	Timp1
ENSMUSG00000074782	3.20044778573497	4.75930401686958	0.00143963048266219	4833422C13Rik
ENSMUSG00000039706	17.220782934877	4.75564682176785	1.33123962574236e-09	Ldb2
ENSMUSG00000097352	8.70759723670728	4.75117877526521	0.000756449708691121	NA
ENSMUSG00000028328	4.71263434920546	4.74565079856588	0.000472672175573111	Tmod1
ENSMUSG00000020077	1717.50672611606	4.73732616004681	2.86027566709709e-17	Srgn
ENSMUSG00000022237	168.8859819183	4.7319222626106	1.14923573063247e-11	Ankrd33b
ENSMUSG00000023224	459.800820124955	4.71454953241735	9.09887847334197e-56	Serping1
ENSMUSG00000009292	62.289440469513	4.70785109057183	3.19854312110527e-16	Trpm2
ENSMUSG00000095609	2.01566567230305	4.70145306975999	0.00957683275725839	Gm21188
ENSMUSG00000043943	2.40196806009281	4.70050302155694	0.00211122766601171	Naalad2
ENSMUSG00000029915	66.4147171038852	4.69791962915489	9.2447895602769e-15	Clec5a
ENSMUSG00000107352	6.95311957097879	4.69534406877069	7.45035880232793e-06	NA
ENSMUSG00000054196	7.02220056202791	4.68968838797748	0.000203782072216347	Cthrc1
ENSMUSG00000013584	17.8710517130116	4.68122533908865	1.74897042684317e-12	Aldh1a2
ENSMUSG00000059013	191.998179319723	4.67214853636419	2.46132793266523e-16	Sh2d3c
ENSMUSG00000032118	12.3202176348701	4.67112477482978	1.32005901312464e-08	Fez1
ENSMUSG00000074417	13.1094759958376	4.66709321517952	4.15393324340562e-06	Pira11
ENSMUSG00000053338	36.6457329175191	4.66227620289622	5.40214246940666e-11	Tarm1
ENSMUSG00000034652	40.9015886940051	4.65776440347478	6.31305021780423e-11	Cd300a
ENSMUSG00000108695	3.26178396065801	4.65067533633441	0.00451349551885455	Gm2511
ENSMUSG00000018893	20.2282961477481	4.64693347285945	2.55506013997737e-06	Mb
ENSMUSG00000064179	7.4255282465428	4.6462256901921	0.000171215077114804	Tnnt1
ENSMUSG00000066684	18.0370051493764	4.64328667035579	9.06289475191368e-10	Pilrb1
ENSMUSG00000090698	84.1169793015416	4.6428980119481	6.0955420348188e-17	Apold1
ENSMUSG00000072620	483.670971642938	4.6395761854565	2.91606188240442e-13	Slfn2
ENSMUSG00000020486	7.35304407202681	4.63432170080727	0.000347698200786415	36769
ENSMUSG00000020241	290.726205928085	4.63361730482116	2.09579641166174e-40	Col6a2
ENSMUSG00000039115	35.9371135925418	4.62673266968152	1.73060384481255e-12	Itga9
ENSMUSG00000090439	4.00563853522112	4.62426244830998	0.00104427336240188	Gm17455
ENSMUSG00000057802	1.44885637744077	4.61804334537886	0.00883290653413857	Gm10030
ENSMUSG00000027074	85.3461244527155	4.6174471703365	1.82775080365946e-27	Slc43a3
ENSMUSG00000027684	2.7641208922913	4.61645927991029	0.00196024074525519	Mecom
ENSMUSG00000016349	4.46955671445991	4.61463488413867	0.00520675607106432	Eef1a2
ENSMUSG00000035279	48.6535115438138	4.60054333310441	1.41420933740582e-20	Ssc5d
ENSMUSG00000026228	4.39220530317726	4.60016678064539	0.000569842083705631	Htr2b
ENSMUSG00000090019	4.55799882168875	4.59920484469046	0.00171838349824252	Gimap1
ENSMUSG00000042190	28.7390493773777	4.59768048784338	4.9054869336708e-16	Cmklr1
ENSMUSG00000021614	268.123352660855	4.59659011750823	5.46801807691217e-19	Vcan
ENSMUSG00000027869	192.439851111972	4.59218260961711	7.75862147850594e-15	Hsd3b6
ENSMUSG00000040592	2.85994985797849	4.59209911389949	0.00728543042257996	Cd79b
ENSMUSG00000026678	2.77939494511541	4.59183904424861	0.00387757848827989	Rgs5
ENSMUSG00000017300	19.63453789723	4.58921695274006	7.75777496353475e-07	Tnnc2
ENSMUSG00000058396	11.9460628824879	4.58418126763397	8.04503244640446e-09	Gpr182
ENSMUSG00000019990	26.6907394816715	4.58247238913912	4.22512046256548e-11	Pde7b
ENSMUSG00000070526	2.01556586250542	4.58113027223043	0.00667000570889941	Peg12
ENSMUSG00000030730	29.1391090619602	4.57766317910984	9.04305046933943e-08	Atp2a1
ENSMUSG00000028480	69.375882065096	4.57196947515649	2.85588487039571e-21	Glipr2
ENSMUSG00000001819	6.76529204562021	4.56562082346675	0.000108997154947595	Hoxd13
ENSMUSG00000032372	2.21124055132202	4.56346030056203	0.00778209410451348	Plscr2
ENSMUSG00000050425	2.71934220626262	4.54845451334775	0.00444071567949561	Mrgprb2
ENSMUSG00000026921	62.2433211541448	4.54416243943048	2.36122769617258e-16	Egfl7
ENSMUSG00000047261	5.71653606253335	4.54358514424677	0.000181748420118074	Gap43
ENSMUSG00000051177	20.5797065200923	4.53394269397824	3.58036814582514e-10	Plcb1
ENSMUSG00000046280	22.8114774881064	4.53337415958758	1.53743253325973e-10	She
ENSMUSG00000029603	28.5812925259563	4.53269769200914	1.0295040935868e-06	Dtx1
ENSMUSG00000046006	8.12946685660028	4.52521105215792	3.06726562559871e-06	Gapt
ENSMUSG00000020620	3.89770119142463	4.52345370790661	0.00161310115257861	Abca8b
ENSMUSG00000021047	11.0481154131842	4.52087129174881	7.46299109964976e-06	Nova1
ENSMUSG00000026536	56.645649562308	4.51252688835874	1.07245366389769e-22	Ifi211
ENSMUSG00000034041	13.5617376778557	4.51005963675362	3.26633175569218e-07	Lyl1
ENSMUSG00000041134	13.12179717965	4.50761766753718	5.04910706761925e-09	Cyyr1
ENSMUSG00000037358	2.50403150766241	4.5059950512826	0.00714057287098338	Dipk2b
ENSMUSG00000105954	7.14883307670928	4.50450749817028	0.00046497612048798	NA
ENSMUSG00000054203	75.8733459665381	4.49075053881169	1.66186339921835e-18	Ifi205
ENSMUSG00000053475	81.0807809111812	4.48204998343337	1.80298465959247e-28	Tnfaip6
ENSMUSG00000021186	33.8363669372876	4.48173494471638	1.30942347836992e-12	Fbln5
ENSMUSG00000040552	34.0836860824973	4.47992761721612	8.89108265098488e-14	C3ar1
ENSMUSG00000025902	2.40469675982709	4.4715680498819	0.00288352753835082	Sox17
ENSMUSG00000032028	2.72219596836056	4.46297491715908	0.00628348912570136	Nxpe2
ENSMUSG00000046058	6.1801385631634	4.46270419467334	0.000114099926311548	Eid2
ENSMUSG00000029925	7.9896832914223	4.46107406758378	0.000103047462018283	Tbxas1
ENSMUSG00000019899	46.4168734137746	4.45917589092418	5.23529469038928e-20	Lama2
ENSMUSG00000026193	1430.70430877746	4.45879439655203	4.981277026706e-13	Fn1
ENSMUSG00000030147	3.00285494787795	4.45851359183194	0.00372809400307789	Clec4b1
ENSMUSG00000043157	8.874914579597	4.45615701204974	6.13511455874665e-05	Arl11
ENSMUSG00000008153	81.6811467961829	4.45493791158512	2.86027566709709e-17	Clstn3
ENSMUSG00000041378	79.347230896404	4.45120713210138	3.68787587411075e-09	Cldn5
ENSMUSG00000062257	1.7169288532868	4.44862854143549	0.00945413440305129	Opcml
ENSMUSG00000027219	35.4669795352524	4.44452782109737	3.8245784640447e-14	Slc28a2
ENSMUSG00000027188	17.4212036161803	4.44038331498735	1.3699559258876e-11	Pamr1
ENSMUSG00000005397	226.556249394275	4.42946763872372	1.09022105863616e-30	Nid1
ENSMUSG00000038112	34.4016213212705	4.42408746093734	1.87333916983908e-24	AW551984
ENSMUSG00000045932	106.93317403198	4.42104534621279	1.03232805111771e-08	Ifit2
ENSMUSG00000030399	28.099854650465	4.41977689227638	9.75688355558378e-08	Ckm
ENSMUSG00000027832	106.475553203937	4.41821323764427	5.63209065241306e-22	Ptx3
ENSMUSG00000015314	2.48000891168715	4.41755917981866	0.00738924344052831	Slamf6
ENSMUSG00000004098	94.2345492219305	4.39179415249185	6.48969053283758e-22	Col5a3
ENSMUSG00000027716	3.49935856534935	4.38835559346704	0.0013964350734418	Trpc3
ENSMUSG00000045930	6.56643583568298	4.38517955990593	5.53766746241064e-05	Clec14a
ENSMUSG00000022425	51.1562959079274	4.3850298412736	6.86295757568383e-21	Enpp2
ENSMUSG00000051617	139.560230745114	4.3825775411968	1.57531113441926e-08	Krt9
ENSMUSG00000021612	1.76239035871749	4.38248025819141	0.00671528584194958	Slc6a18
ENSMUSG00000043953	545.345087402328	4.37996388688855	5.67410769545735e-11	Ccrl2
ENSMUSG00000041828	5.56544434270853	4.37814860635194	0.00161806018213336	Abca8a
ENSMUSG00000013921	13.5598606568741	4.37796413314237	8.38939447013926e-10	Clip3
ENSMUSG00000100510	2.13552228707535	4.37558423287604	0.00599603540004076	NA
ENSMUSG00000041536	7.15861891605044	4.37378552256782	0.00160121594216902	Serpina3a
ENSMUSG00000033579	1527.87612877657	4.37231198571445	3.40090623189463e-10	Fa2h
ENSMUSG00000020120	1413.58269948905	4.36847166716187	7.30188706807957e-14	Plek
ENSMUSG00000025017	281.572691755472	4.36546599189167	9.04169825028135e-14	Pik3ap1
ENSMUSG00000054435	13.1572020780883	4.36490366876648	1.63315846989882e-06	Gimap4
ENSMUSG00000007877	9.32403840752886	4.36415310846293	0.000259850355783381	Tcap
ENSMUSG00000035448	5.74670628473386	4.36055385510827	8.42215435422851e-05	Ccr3
ENSMUSG00000054293	10.2164975027404	4.35655147842724	2.46350911861704e-06	P2ry10b
ENSMUSG00000034459	240.853105598848	4.34929683115031	3.57988232217574e-06	Ifit1
ENSMUSG00000022122	28.7845799572474	4.34723628211903	1.72770506580653e-10	Ednrb
ENSMUSG00000022053	5.91674552875484	4.34699494656845	0.0001599817193805	Ebf2
ENSMUSG00000046159	6.6235409626012	4.34643745345441	0.000146294755824365	Chrm3
ENSMUSG00000001946	23.2104827890682	4.34295966081103	1.65726687394804e-15	Esam
ENSMUSG00000020953	24.2636232832523	4.33960124776491	9.73209730659161e-06	Coch
ENSMUSG00000081225	38.227427745439	4.33659731311697	4.6974158911727e-15	Cyp2j12
ENSMUSG00000050368	3.15352787204399	4.33552621017276	0.00699518904212169	Hoxd10
ENSMUSG00000024168	11.0182351129398	4.32872238006149	9.0324419423261e-06	Tmem204
ENSMUSG00000038203	3.26874262058511	4.32083060671666	0.0068396111680262	Hoxa13
ENSMUSG00000035799	42.7777350388257	4.31187484983847	7.7002186913269e-21	Twist1
ENSMUSG00000041577	442.302929853632	4.29063974410437	8.33082643899072e-24	Prelp
ENSMUSG00000073418	64.1560827418353	4.28912672517515	4.85412997562071e-29	C4b
ENSMUSG00000001029	14.5511145423912	4.28077434577234	2.23110488943584e-09	Icam2
ENSMUSG00000026837	221.843072899046	4.27487607658431	2.60378994645947e-28	Col5a1
ENSMUSG00000033419	60.2422669573166	4.26999054842015	9.66968807625376e-19	Snap91
ENSMUSG00000078504	20.2839055584019	4.26953221310818	5.08766585335696e-07	Aadacl4fm5
ENSMUSG00000001493	17.307854735976	4.26213759556805	3.74719024777362e-08	Meox1
ENSMUSG00000029309	40.0441337402625	4.26193225411311	2.75038290058175e-11	Sparcl1
ENSMUSG00000025608	91.9681388799938	4.25805467485549	1.98797655187769e-24	Podxl
ENSMUSG00000020902	136.764624958921	4.25739167690199	3.66973043389916e-28	Ntn1
ENSMUSG00000070031	101.452478858052	4.25604884699157	9.39018134982197e-17	Sp140
ENSMUSG00000022220	60.1956315655492	4.25218553976273	2.05204352355664e-21	Adcy4
ENSMUSG00000046470	21.1146565382274	4.2503279242818	4.28101096073897e-09	Sox18
ENSMUSG00000033006	4.30568314423549	4.24009074943296	0.00358771805033663	Sox10
ENSMUSG00000051498	20.5532523547074	4.23000762139566	5.14650142026989e-09	Tlr6
ENSMUSG00000070419	32.0409472947667	4.2271422807472	1.23025731253007e-14	Cyp3a57
ENSMUSG00000056290	7.29844883505309	4.22634932527509	9.12096280826202e-05	Ms4a4b
ENSMUSG00000001741	43.7393127196927	4.22596055605013	2.1820984340971e-13	Il16
ENSMUSG00000054404	180.796833219529	4.21569550855896	8.4756463453011e-15	Slfn5
ENSMUSG00000007480	42.3153262804488	4.21547105574235	2.55099039391307e-13	Mc5r
ENSMUSG00000041696	2.0445013181892	4.21534887228614	0.00863751405725697	Rasl12
ENSMUSG00000027016	23.5331058174809	4.20688300297742	2.11652058283735e-10	Zfp385b
ENSMUSG00000043631	28.8329639877602	4.19868858125059	1.93656497210855e-16	Ecm2
ENSMUSG00000070547	5.4086012324919	4.19665609735361	0.000701511525025563	Mrgprb1
ENSMUSG00000005320	2.9994601192883	4.19371403666066	0.00633455964890622	Fgfr4
ENSMUSG00000082932	17.2490401466381	4.19156488759535	6.83965405062973e-08	Cyp2j8
ENSMUSG00000050671	3.08558993543039	4.19064379145027	0.00766767421746524	Ism2
ENSMUSG00000029913	9.32772395274942	4.18504724806694	6.31526418683624e-07	Prdm5
ENSMUSG00000015053	35.0047239525319	4.18437860300471	1.67616559182373e-15	Gata2
ENSMUSG00000028717	13.8958420798471	4.18377948774727	6.20980271099151e-08	Tal1
ENSMUSG00000090523	37.5010476669775	4.17592652067536	5.87751942010548e-14	Gypc
ENSMUSG00000060791	58.7365059385574	4.17536180283631	1.32155374313385e-15	Gmfg
ENSMUSG00000082292	8.68555197565209	4.16457585015355	8.73025140674979e-06	NA
ENSMUSG00000056091	18.8948659384587	4.15337030330078	1.86752445956267e-10	St3gal5
ENSMUSG00000078920	51.2926643065342	4.14996676887832	3.61543717878491e-07	Ifi47
ENSMUSG00000039476	14.5715984194898	4.1375092516455	4.32400145757836e-08	Prrx2
ENSMUSG00000039007	21.2742286488875	4.12992336132868	9.04169825028135e-14	Cpq
ENSMUSG00000057191	44.6823809782594	4.12817920377961	4.98235472457613e-13	AB124611
ENSMUSG00000091423	2.42494970837899	4.12801459280267	0.00762943918485316	NA
ENSMUSG00000073491	18.8089875129721	4.12701956574834	2.51903800704088e-09	Ifi213
ENSMUSG00000044629	7.90945116088709	4.12344916699724	3.23368427075623e-07	Cnrip1
ENSMUSG00000032006	2.21022325505382	4.1180828022709	0.00818653807379161	Pdgfd
ENSMUSG00000054555	19.3639141707154	4.11491511207755	3.41395251816961e-09	Adam12
ENSMUSG00000024998	27.4859405459233	4.11348389907392	3.26093728691949e-12	Plce1
ENSMUSG00000041735	47.4297398661928	4.11189771199876	2.77817170297888e-13	AAdacl4fm3
ENSMUSG00000039899	581.809318426931	4.10997584369994	1.5883837139822e-16	Fgl2
ENSMUSG00000032492	5.90472897836947	4.10254573425729	0.000131690020041166	Pth1r
ENSMUSG00000027073	4.84257016159023	4.09806201844495	0.0035418953069921	Prg2
ENSMUSG00000051111	9.69591021177305	4.09321625678111	2.22830592105493e-07	Sv2c
ENSMUSG00000017309	11.3456645785712	4.08934776836135	1.5247151561784e-05	Cd300lg
ENSMUSG00000056973	121.293688940031	4.07920027043325	6.16437443104177e-16	Ces1d
ENSMUSG00000030787	298.878095579286	4.07325171358535	1.60908494832451e-29	Lyve1
ENSMUSG00000048960	17.1621084822978	4.05451488199683	7.3936579306328e-10	Prex2
ENSMUSG00000056758	26.1550273620242	4.04839384985434	4.45390393241142e-09	Hmga2
ENSMUSG00000029082	59.4404311008502	4.04587313772228	7.86044623138396e-17	Bst1
ENSMUSG00000033278	26.8735954639191	4.04304455635116	4.70721959609212e-14	Ptprm
ENSMUSG00000022887	6.19533862123025	4.03068413835633	3.77746558399593e-05	Masp1
ENSMUSG00000027966	4.47821353218661	4.02358004815191	0.00219934500681155	Col11a1
ENSMUSG00000022026	5.19800850009419	4.02033992124297	0.00515511736425549	Olfm4
ENSMUSG00000032915	12.0046367554484	4.01943374385467	2.02783793587595e-06	Adgre4
ENSMUSG00000020363	179.637447513455	4.01834722442971	1.07245366389769e-22	Gfpt2
ENSMUSG00000030935	10.633214553928	4.01476297088009	1.37724282076817e-06	Acsm3
ENSMUSG00000071984	277.225792462697	4.01471086869257	2.16462501139198e-49	Fndc1
ENSMUSG00000002944	104.043928904372	4.01255813260815	1.65614462482487e-34	Cd36
ENSMUSG00000035373	230.550943000545	4.01034315095888	4.09967341055763e-11	Ccl7
ENSMUSG00000031994	4.53259554830135	4.00738874853066	0.0045889480935699	Adamts8
ENSMUSG00000030921	175.223587939992	4.00606272478649	9.19896584127357e-14	Trim30a
ENSMUSG00000032691	1154.39758583222	4.0056506532079	1.47579109744126e-12	Nlrp3
ENSMUSG00000023349	45.3925677379947	4.00464655511812	1.4903935508051e-09	Clec4n
ENSMUSG00000048779	11.1632124049316	4.00453961495736	4.12418602306913e-08	P2ry6
ENSMUSG00000026480	240.441300336668	4.00108139199522	4.03018062803735e-14	Ncf2
ENSMUSG00000004651	6.67238520565348	4.00076764743352	0.00308808912740331	Tyr
ENSMUSG00000031443	4.32787507856126	3.99641369553601	0.000483516613448408	F7
ENSMUSG00000033788	29.8493837509414	3.99611165596782	2.83303433610915e-13	Dysf
ENSMUSG00000028417	3.4885749894789	3.99266825896285	0.00473176098502564	Tal2
ENSMUSG00000031375	489.811927516678	3.98938675022554	6.83121008286125e-15	Bgn
ENSMUSG00000005824	56.9120758430542	3.98011063889639	7.05821557142665e-12	Tnfsf14
ENSMUSG00000039013	4.60264917798027	3.97589604801173	0.00287571034033895	Siglecf
ENSMUSG00000053835	26.2674024774193	3.97361063610419	8.26021258031134e-09	H2-T24
ENSMUSG00000033220	186.062861485283	3.97286407373951	9.65181686681468e-22	Rac2
ENSMUSG00000021986	3.63187098729529	3.97167223063885	0.00314011424721715	Amer2
ENSMUSG00000044827	14.1714705439668	3.97054827598727	1.41282164733847e-06	Tlr1
ENSMUSG00000028978	85.7475796552622	3.97041328795516	1.46813622727094e-25	Nos3
ENSMUSG00000097779	24.021675169445	3.96194864814069	3.15147407699352e-08	NA
ENSMUSG00000010175	44.390579456887	3.96154799492279	5.23409709824067e-16	Prox1
ENSMUSG00000059022	9.45402156664402	3.95741677281484	0.00010973050892653	Kcp
ENSMUSG00000043505	6.10779495362917	3.95539548094297	0.00192540727638538	Gimap5
ENSMUSG00000089942	8.22724215739669	3.95445757098225	0.000510554086097119	Pira2
ENSMUSG00000038456	23.019180269829	3.95270814371685	8.57473091060012e-13	Dennd2a
ENSMUSG00000104654	5.1619005833321	3.94251135708829	0.00049903995338715	NA
ENSMUSG00000074361	6.55014613700813	3.94152583390447	9.84717635365114e-05	C5ar2
ENSMUSG00000018868	101.679380955122	3.93589406860862	3.08733357300376e-19	Pnpla5
ENSMUSG00000070354	3.63310784565458	3.93133060504121	0.00248022468580405	Evi2
ENSMUSG00000025058	18.3771776780588	3.92658470617283	2.60779298865206e-08	5430427O19Rik
ENSMUSG00000046618	41.5163805106255	3.92292789139723	1.25580043247874e-18	Olfml2a
ENSMUSG00000006586	2.58050772078525	3.92292080396309	0.00621614745980677	Runx1t1
ENSMUSG00000020810	107.40559013601	3.92165271888194	1.41950368078415e-34	Cygb
ENSMUSG00000058869	5.12553278002605	3.91018853366886	0.000735322516408967	Gm4832
ENSMUSG00000028036	3.67198764751011	3.90394064991595	0.00802498557448864	Ptgfr
ENSMUSG00000026185	792.589313411788	3.90059230095679	7.62694167906385e-19	Igfbp5
ENSMUSG00000020577	43.6345103409903	3.89937125857999	1.04525811210337e-10	Tspan13
ENSMUSG00000032186	25.6920697766459	3.88564756542805	4.00589079545647e-10	Tmod2
ENSMUSG00000033910	8.97233370476958	3.87653917580823	0.00270017503571938	Gucy1a1
ENSMUSG00000033355	124.358976079503	3.87622077345535	2.854340152506e-16	Rtp4
ENSMUSG00000030278	10.9153095213882	3.86644782182493	1.19693741160634e-07	Cidec
ENSMUSG00000038754	254.952505242002	3.86150443501007	7.15494699159282e-12	Elovl3
ENSMUSG00000040026	49.9242025866185	3.86087560643646	4.9121127891534e-11	Saa3
ENSMUSG00000019989	21.178932542642	3.85664638767342	4.47220798460822e-09	Enpp3
ENSMUSG00000030162	77.6113715211103	3.85534376859842	1.20506947412507e-05	Olr1
ENSMUSG00000015090	7.15955623530569	3.85359602576896	0.00224449488543604	Ptgds
ENSMUSG00000034266	15.6077123953019	3.85235193748495	2.22559243767488e-05	Batf
ENSMUSG00000073176	5.8117128815192	3.84096555670934	0.000846025171468513	Zfp449
ENSMUSG00000079293	481.166827590774	3.83869136678332	9.45085855293204e-10	Clec7a
ENSMUSG00000019539	39.5281677996077	3.83853517270873	3.83068222195106e-15	Rcn3
ENSMUSG00000027380	354.546086245513	3.83278759928638	5.2880616746559e-09	Acoxl
ENSMUSG00000030579	331.502908154848	3.83239547778433	3.49127220005599e-13	Tyrobp
ENSMUSG00000038587	73.4390324133236	3.83160042451563	1.21369134284462e-30	Akap12
ENSMUSG00000045362	35.409094585595	3.82475749473942	1.41199748413627e-09	Tnfrsf26
ENSMUSG00000023132	7.08636959771176	3.81806051533557	0.00375104396268875	Gzma
ENSMUSG00000018986	7.7631250031473	3.81550593964302	3.44430920031686e-05	Slfn3
ENSMUSG00000058427	1823.43686361314	3.81276463194585	7.24161411439086e-18	Cxcl2
ENSMUSG00000038188	21.7937351604491	3.81088599986172	1.24149018393625e-10	Scarf1
ENSMUSG00000074805	31.3827737893959	3.809588398529	3.31788530434551e-10	Il1bos
ENSMUSG00000074589	36.1917738700422	3.80748146474673	3.91145451217373e-12	Gm16527
ENSMUSG00000031517	12.5108704092184	3.79772407056602	0.00010357854600768	Gpm6a
ENSMUSG00000060445	25.8946020400075	3.79607658338922	1.02974869161008e-06	Sycp2
ENSMUSG00000030247	6.09470558546275	3.79543560801123	0.000112627842005895	Kcnj8
ENSMUSG00000018924	10.5884439398923	3.7798551406249	1.22070017332821e-05	Alox15
ENSMUSG00000050994	3.14275378362855	3.77974062112045	0.00645951903403263	Adgb
ENSMUSG00000032625	11.6004600700504	3.77481489651025	8.5661858836119e-07	Thsd7a
ENSMUSG00000078505	8.04290850307925	3.77142679754887	0.000262369096276737	Aadacl4fm4
ENSMUSG00000030303	1324.25069250258	3.76884346855569	9.77987211911342e-13	Far2
ENSMUSG00000016756	54.99839992777	3.76498410822833	1.48402747617445e-14	Cmah
ENSMUSG00000002847	8.53653694550689	3.76425770058028	0.000146294755824365	Pla1a
ENSMUSG00000011118	109.601455769085	3.76209563291338	1.10549302763481e-08	Panx3
ENSMUSG00000089844	4.85148582778352	3.7610316308085	0.00126038607616911	A530032D15Rik
ENSMUSG00000000290	351.976961990091	3.76096325534733	1.28734076652906e-24	Itgb2
ENSMUSG00000004631	23.968112300418	3.75266768778074	1.03385958585882e-08	Sgce
ENSMUSG00000027435	119.185697400217	3.74785437241797	1.18664664563807e-16	Cd93
ENSMUSG00000037759	11.0299434160564	3.74556417106673	3.35480161384326e-07	Ptger2
ENSMUSG00000024737	622.441584153189	3.74503642054978	2.36479565713224e-12	Slc15a3
ENSMUSG00000032827	3.91291360139678	3.73795307771513	0.0062572408643704	Ppp1r9a
ENSMUSG00000021090	5.54804115686267	3.73015908892912	0.00739129581478777	Lrrc9
ENSMUSG00000057604	30.4111347984918	3.72762709041483	6.48476104258812e-11	Lmcd1
ENSMUSG00000059498	194.190397928969	3.72080502466042	1.90063342525745e-20	Fcgr3
ENSMUSG00000026600	621.578614074921	3.7161964707492	1.98393073561579e-11	Soat1
ENSMUSG00000044811	18.9081573391757	3.7136356555537	3.12116623000358e-11	Cd300c2
ENSMUSG00000059108	69.4606876326572	3.70789950779127	7.88853010702095e-13	Ifitm6
ENSMUSG00000043017	23.1468118178886	3.696657439268	1.12817914397892e-13	Ptgir
ENSMUSG00000032243	6.08641132642176	3.69586948897721	0.00119655129491096	Itga11
ENSMUSG00000105504	28.3680427231944	3.69446536179036	7.61789825806559e-11	Gbp5
ENSMUSG00000018008	179.726679818093	3.6864905887471	1.01954015196412e-20	Cyth4
ENSMUSG00000025094	4.78194833347659	3.68528217264836	0.00447227054859221	Slc18a2
ENSMUSG00000038248	4.54558619138086	3.68079866193336	0.000439487952536542	Sobp
ENSMUSG00000045658	78.2587014284419	3.6710969631746	5.76275258336781e-21	Pid1
ENSMUSG00000079013	1512.46392761101	3.66241875037237	5.31479344210904e-15	Serpina3j
ENSMUSG00000074971	5.60596329129056	3.66068152401457	0.00458260305228819	Fibin
ENSMUSG00000025355	194.969610019192	3.65830062024357	1.35442269344809e-09	Mmp19
ENSMUSG00000015950	219.695821896262	3.64654650365565	3.22829597498055e-11	Ncf1
ENSMUSG00000028369	28.9218136090458	3.63954278481428	1.26439961640809e-16	Svep1
ENSMUSG00000058818	189.977929859501	3.63632481686892	7.6075382764312e-12	Pirb
ENSMUSG00000030365	5.09903612577274	3.63565392086329	0.00110161610560341	Clec2i
ENSMUSG00000032841	11.1162613786937	3.62225303469242	5.78331789015815e-06	Prr5l
ENSMUSG00000054580	102.261575814423	3.60149345325138	6.6810410831975e-24	Pla2r1
ENSMUSG00000044206	8.09481840825532	3.59668506214537	0.000584983346783232	Vsig4
ENSMUSG00000064147	233.502999882635	3.59407636706118	3.96790350260519e-10	Rab44
ENSMUSG00000062007	10.6609970509888	3.5883582723595	8.48785172507648e-05	Hsh2d
ENSMUSG00000038463	30.8392807540546	3.58588307054461	1.73991058927173e-14	Olfml2b
ENSMUSG00000090527	70.2718579487343	3.57934478595256	2.15859652006892e-15	Aadacl2fm2
ENSMUSG00000049281	4.72996834706225	3.57325304670263	0.00198518595130645	Scn3b
ENSMUSG00000042485	25.6777533260893	3.57134808051598	5.41931311777997e-13	Mustn1
ENSMUSG00000028766	25.9648431548516	3.56636848395046	3.46087959867564e-12	Alpl
ENSMUSG00000033722	25.094618661962	3.5587069723395	2.05948225062189e-08	BC034090
ENSMUSG00000016494	284.985343503524	3.55240910805304	1.05680437104265e-30	Cd34
ENSMUSG00000064080	266.3375609984	3.54980385863169	2.10336934582079e-27	Fbln2
ENSMUSG00000020154	45.7751657220522	3.54695221241646	4.32959440546192e-11	Ptprb
ENSMUSG00000024395	9.76058657672871	3.54444696358631	3.16908818814649e-06	Lims2
ENSMUSG00000021423	20.9783829169047	3.54039503493226	4.82506665561909e-09	Ly86
ENSMUSG00000031239	16.8744425349939	3.53275351684702	7.7705768836556e-08	Itm2a
ENSMUSG00000041731	22.6012012146635	3.5248491386044	8.96907761301669e-08	Pgm5
ENSMUSG00000074472	6.06741975157117	3.52335459550242	0.00323597607027694	Zfp872
ENSMUSG00000028989	55.5538701986292	3.51304122172198	1.30930374005431e-07	Angptl7
ENSMUSG00000015568	189.556277292398	3.50912176710124	3.42285467366714e-17	Lpl
ENSMUSG00000006519	126.018125719924	3.50727375366895	3.68169521867716e-15	Cyba
ENSMUSG00000032024	192.651488435535	3.50164942619257	4.75686760917963e-22	Clmp
ENSMUSG00000016918	145.059732073932	3.49181133209782	3.11189121142326e-26	Sulf1
ENSMUSG00000025726	6.06340889603709	3.49044463620073	0.00190167300899865	Slc28a1
ENSMUSG00000002808	41.6152103890576	3.4830179775093	6.15642507739647e-20	Epdr1
ENSMUSG00000020642	26.712834239847	3.48056741559225	4.56646433911647e-07	Rnf144a
ENSMUSG00000090272	101.634737752609	3.47746329544462	5.6070044463816e-18	Mndal
ENSMUSG00000075289	180.530092729158	3.47600753177663	3.84755012495335e-18	Carns1
ENSMUSG00000018459	7.64175168128698	3.47555911153432	0.000894868657701664	Slc13a3
ENSMUSG00000063234	24.6223539323501	3.47446798679637	1.94843621597744e-07	Gpr84
ENSMUSG00000023019	115.114923914641	3.47383308207982	6.57605718550003e-18	Gpd1
ENSMUSG00000041482	18.0334224120737	3.46332820920332	1.10445209288489e-07	Piezo2
ENSMUSG00000028005	10.5126261822642	3.46096696992102	0.00496691194523781	Gucy1b1
ENSMUSG00000035042	23.0048279304429	3.46004310236181	2.07040931727628e-09	Ccl5
ENSMUSG00000051506	50.2154760374649	3.45865089300781	1.19342860237415e-09	Wdfy4
ENSMUSG00000042540	22.6669824004844	3.45687918017342	1.91498904029618e-09	Acot5
ENSMUSG00000070034	73.9937056206578	3.45281995228627	3.08532668949194e-14	Sp110
ENSMUSG00000058715	285.496594239552	3.44110240935183	1.0282876358e-09	Fcer1g
ENSMUSG00000095128	26.3592264120712	3.43653988016423	1.31494752587191e-09	Gm5709
ENSMUSG00000022686	33.4447881563563	3.43130529523956	2.75327685634379e-12	B3gnt5
ENSMUSG00000030043	3.96169259858072	3.43105536084803	0.00384419310846381	Tacr1
ENSMUSG00000026222	205.308164932364	3.42825767452351	1.45199766297251e-16	Sp100
ENSMUSG00000019987	19.9425262612738	3.42313261039145	6.07172375298312e-07	Arg1
ENSMUSG00000022623	68.4798541341472	3.41794318929029	1.35798222638311e-17	Shank3
ENSMUSG00000108218	8.01392108762336	3.41776941676002	0.000484793934364393	NA
ENSMUSG00000002831	28.4213133929848	3.41369036167318	3.23657286899847e-09	Plin4
ENSMUSG00000054675	4.74452762991704	3.41318916637733	0.00556487736413626	Tmem119
ENSMUSG00000057596	68.8339687832125	3.40865429423548	1.26493285067031e-13	Trim30d
ENSMUSG00000081665	7.05681864106304	3.40794829656823	0.000154045829713604	Pira1
ENSMUSG00000042228	245.28886941874	3.39090123856981	3.74153336376331e-20	Lyn
ENSMUSG00000035592	14.3913472072418	3.38266551841253	0.00207615303206775	Krt33a
ENSMUSG00000102037	10.394830397147	3.37479109762001	2.04520662090498e-05	Bcl2a1a
ENSMUSG00000028476	24.4205262494911	3.36802281242191	5.78994211812028e-11	Reck
ENSMUSG00000031872	4.54526975112273	3.36741863814272	0.00416002197062898	Bean1
ENSMUSG00000066682	13.9748840222931	3.36403955300418	3.53287971744993e-07	Pilrb2
ENSMUSG00000048138	7.99333793343973	3.3578789693494	2.67695226156184e-06	Dmrt2
ENSMUSG00000055937	41.476253604718	3.3514849662094	0.000511661937080199	Krt28
ENSMUSG00000092920	19.865747810087	3.34404054325967	1.51917156916409e-05	NA
ENSMUSG00000052013	9.4306123140334	3.32043438103569	9.42392758968885e-07	Btla
ENSMUSG00000063286	218.549785598279	3.3173946908966	4.75703929850463e-09	Gm8995
ENSMUSG00000045333	17.9544663575754	3.31281787245331	1.03544216393035e-07	Zfp423
ENSMUSG00000000094	8.27928859627945	3.30952090888041	0.00596578877816459	Tbx4
ENSMUSG00000003206	23.2048454075844	3.30885523194302	3.1525182379127e-09	Ebi3
ENSMUSG00000031662	212.502965246314	3.30769365596611	2.26472872107975e-10	Snx20
ENSMUSG00000020689	62.0453755877342	3.30755283698584	6.95964004387399e-19	Itgb3
ENSMUSG00000061535	10.673890343879	3.30145350421462	1.70156705473796e-06	C1qtnf7
ENSMUSG00000030806	7.92487418855962	3.29730291170695	5.52857782106058e-05	Stx1b
ENSMUSG00000066364	1548.78683249001	3.29047767365114	7.42931140185655e-30	Serpina3b
ENSMUSG00000017588	22.2510174200353	3.2895117554244	0.00046942595568525	Krt27
ENSMUSG00000097358	6.37009649213051	3.27194987797386	0.00070967960684639	NA
ENSMUSG00000062184	6.95761723208381	3.27179207804715	0.00223617722124274	Hs6st2
ENSMUSG00000107355	14.390869903715	3.26875046691118	3.54790223303331e-06	NA
ENSMUSG00000035258	615.193578059252	3.26464916007262	8.1939099034831e-16	Abi3bp
ENSMUSG00000073530	9.54263919581948	3.26135402553515	0.000104546864696297	Pappa2
ENSMUSG00000028864	7.36844572617419	3.25890639621384	0.000175977854532121	Hgf
ENSMUSG00000056071	1662.44755027621	3.25134036254479	1.0985862657008e-07	S100a9
ENSMUSG00000006344	35.6457364772474	3.24769963082926	1.89133131717472e-13	Ggt5
ENSMUSG00000059149	21.3575937279619	3.24412182595115	1.29629445488172e-08	Mfsd4a
ENSMUSG00000079481	17.1869618816341	3.24394794400302	1.37525981850212e-08	Nhsl2
ENSMUSG00000022103	36.1095816579597	3.24371382507574	3.01749625024679e-11	Gfra2
ENSMUSG00000033585	17.4165919867186	3.24318408275282	2.08961144092982e-10	Ndn
ENSMUSG00000030474	45.735695702364	3.23756303660346	2.06660176540191e-13	Siglece
ENSMUSG00000087624	8.03558487455559	3.23627445057134	3.78617203542482e-05	NA
ENSMUSG00000110697	6.7142872233119	3.23616752350963	0.000468916148351911	NA
ENSMUSG00000025347	33.2950139905028	3.23487281016144	1.66442107176585e-05	Mettl7b
ENSMUSG00000066677	13.701241662527	3.224659239419	0.00239525824590814	Ifi208
ENSMUSG00000058099	92.2596027880888	3.2234015242714	2.38949329409254e-10	Nfam1
ENSMUSG00000022667	10.845749063857	3.22279683990314	1.21765273932673e-06	Cd200r1
ENSMUSG00000049625	7.65363759161263	3.21762605311206	0.000304191946286477	Tifab
ENSMUSG00000053199	5.31057501224622	3.21581247470231	0.00250753125403319	Arhgap20
ENSMUSG00000097328	11.9878965491156	3.21328647911002	1.64106849129157e-05	Tnfsf12
ENSMUSG00000056145	50.2326309335002	3.20935645941181	3.98585840412252e-08	AI504432
ENSMUSG00000027082	23.4658523208165	3.19589050668604	2.55978089024149e-12	Tfpi
ENSMUSG00000036782	7.6747578264221	3.19099380948508	0.000988358368608511	Klhl13
ENSMUSG00000014329	48.180777755035	3.18833144411271	3.5299077676471e-13	Bicc1
ENSMUSG00000026829	3.47318234909305	3.18664815730526	0.00874615429884681	Gbgt1
ENSMUSG00000040747	524.632233584624	3.18237868036109	8.12302244740977e-12	Cd53
ENSMUSG00000046182	11.92179178086	3.16920097156301	0.000116046594210495	Gsg1l
ENSMUSG00000029298	76.1907041581627	3.16219594523669	1.0260344433743e-11	Gbp9
ENSMUSG00000024713	33.219976571677	3.16098198268548	2.46007261046677e-12	Pcsk5
ENSMUSG00000001240	69.354474619039	3.15881462461336	3.11355807744328e-19	Ramp2
ENSMUSG00000025597	19.9315499260645	3.15522555710196	0.000313142438049395	Klhl4
ENSMUSG00000024397	15.7620982726532	3.14945880895994	4.60920049649194e-07	Aif1
ENSMUSG00000004552	4.79519817074638	3.14914616106186	0.0055257659092931	Ctse
ENSMUSG00000105837	13.1519732872786	3.1478515329206	5.17056755856779e-07	Gm35986
ENSMUSG00000079442	38.8890655063958	3.14703249659716	2.04630010171688e-13	St6galnac4
ENSMUSG00000032698	48.8669007704772	3.14488632764755	6.53063324033831e-15	Lmo2
ENSMUSG00000023045	17.0509352242499	3.14298861886269	4.79257311680901e-07	Soat2
ENSMUSG00000063430	26.5856915338149	3.13072007293573	2.49748248647772e-08	Wscd2
ENSMUSG00000048163	345.517971292347	3.11291106755212	4.37262331859819e-17	Selplg
ENSMUSG00000051243	12.507239879873	3.11148686146034	0.000336527396665902	Islr2
ENSMUSG00000026482	105.008171770046	3.11079208308966	1.046014613139e-20	Rgl1
ENSMUSG00000052316	21.462958312594	3.10896365933114	0.000435716310831539	Lrrc15
ENSMUSG00000027848	52.4051871714001	3.10393589308768	7.31212419734223e-16	Olfml3
ENSMUSG00000075010	6.50083365705054	3.10203180641683	0.000213423981541178	AW112010
ENSMUSG00000056481	76.7744053114277	3.1019805321521	5.94952171988005e-20	Cd248
ENSMUSG00000029765	14.6049538916943	3.10146293049822	1.10540063974923e-05	Plxna4
ENSMUSG00000039349	26.8990744754364	3.10031041023551	7.34491309652532e-08	C130074G19Rik
ENSMUSG00000028167	5.07076840687696	3.09900544986378	0.00885191287994443	Bdh2
ENSMUSG00000038725	23.9884152455527	3.09713102278978	5.6239030995952e-05	Pkhd1l1
ENSMUSG00000042821	38.6391067871585	3.0831380426912	4.15087241959068e-11	Snai1
ENSMUSG00000049037	47.3611399280906	3.07838562861058	1.68200206177946e-11	Clec4a1
ENSMUSG00000002699	196.137880818162	3.0747729332313	9.8808246409185e-10	Lcp2
ENSMUSG00000023473	10.4872268342452	3.07407079957182	4.21130077399106e-06	Celsr3
ENSMUSG00000007097	43.0616569788086	3.07190687174462	6.01899017246963e-12	Atp1a2
ENSMUSG00000032661	190.265602426508	3.07035357092485	3.12671055862703e-07	Oas3
ENSMUSG00000043008	10.2236422656101	3.06935063760571	6.03784167482896e-05	Klhl6
ENSMUSG00000074570	62.6508513637249	3.06708946509795	8.10383218992351e-10	Cass4
ENSMUSG00000045322	12.5892550271931	3.06464467811887	0.000410097462283473	Tlr9
ENSMUSG00000028874	158.371144267147	3.06446680867981	1.46862639809441e-12	Fgr
ENSMUSG00000073490	172.504545173091	3.061443010161	1.03374839887006e-12	Ifi207
ENSMUSG00000003283	89.9289419795521	3.05238602545144	2.87151138843407e-15	Hck
ENSMUSG00000030707	432.152867085973	3.04972169630956	1.77334242212463e-11	Coro1a
ENSMUSG00000058070	38.673351010791	3.04793989865321	2.37924462493083e-11	Eml1
ENSMUSG00000067780	24.8571694534353	3.04778539557646	2.96565447717809e-08	Pi15
ENSMUSG00000079049	25.597975160789	3.03989001651709	1.94371749078518e-07	Serpinb1c
ENSMUSG00000031355	14.6075147981903	3.02802720170007	1.58857594764232e-06	Arhgap6
ENSMUSG00000060063	266.64679984402	3.02573807220625	9.08049961064952e-16	Alox5ap
ENSMUSG00000028339	36.9165737969177	3.02450233170924	1.2375562807924e-12	Col15a1
ENSMUSG00000022831	241.197537940963	3.02132519815804	3.22249927185445e-15	Hcls1
ENSMUSG00000021596	19.1711164216598	3.02059076187593	1.11244861939966e-08	Mctp1
ENSMUSG00000040170	12.2270070480742	3.01860352896805	0.000280404076211051	Fmo2
ENSMUSG00000023000	4.74462888942916	3.01276424708459	0.000822942717617647	Dhh
ENSMUSG00000074071	6.51725387598699	3.01189585555051	0.00124761762012287	Fam169b
ENSMUSG00000031780	15.0205952467324	3.00400091913876	1.15678741844711e-06	Ccl17
ENSMUSG00000049744	13.5089238754771	3.00305022542217	0.000106725514374359	Arhgap15
ENSMUSG00000038352	66.0084132056567	2.99688109530441	2.84056619499893e-15	Arl5c
ENSMUSG00000000440	123.541312749308	2.99665362854843	3.89342178434279e-05	Pparg
ENSMUSG00000016498	6.23392911872248	2.99508070234293	0.000118750288524435	Pdcd1lg2
ENSMUSG00000021990	189.564632443425	2.97886085447687	8.7257575381842e-16	Spata13
ENSMUSG00000027514	127.762905659149	2.97166749553468	4.16594744228918e-13	Zbp1
ENSMUSG00000022330	17.4308552599617	2.96512886269903	2.4104663876944e-10	Osr2
ENSMUSG00000038011	14.2488990257125	2.96307590773448	4.28294337565372e-06	Dnah10
ENSMUSG00000023913	215.587315217432	2.9614751738793	4.46386335001058e-15	Pla2g7
ENSMUSG00000037217	4.9068260085293	2.95404656772395	0.00121144367463955	Syn1
ENSMUSG00000064262	11.251084641558	2.95110003085598	2.29875179289465e-05	Gimap8
ENSMUSG00000003153	224.755860603699	2.94522814834818	1.09663872974434e-14	Slc2a3
ENSMUSG00000033849	23.7765116096783	2.94307965672678	3.3220747360083e-06	B3galt2
ENSMUSG00000031494	9.97664824199878	2.94145488279957	0.000370110216489324	Cd209a
ENSMUSG00000037406	27.1476807430005	2.94038229961532	1.61352242194112e-07	Htra4
ENSMUSG00000022586	8.89327634057598	2.93871423615702	5.07820114805009e-05	Ly6i
ENSMUSG00000028524	4.39208348879813	2.93471932527258	0.00349178459267565	Sgip1
ENSMUSG00000108022	152.026681405182	2.933819276044	1.09802197947824e-06	NA
ENSMUSG00000025586	61.8961436179717	2.93307923531049	2.0994709485673e-14	Cpeb1
ENSMUSG00000008496	14.0345334628536	2.93112813556542	1.69956377479799e-06	Pou2f2
ENSMUSG00000011008	41.863485729097	2.92803211592957	1.68507659103596e-12	Mcoln2
ENSMUSG00000036006	91.7589203874963	2.92459576222305	4.06317654687149e-09	Ripor2
ENSMUSG00000055632	57.7781429860482	2.92195219860173	4.64385031160497e-20	Hmcn2
ENSMUSG00000031342	35.8649120174325	2.92193870091744	1.95004209826392e-09	Gpm6b
ENSMUSG00000059994	4.01033355019216	2.9150288444392	0.00916089519093687	Fcrl1
ENSMUSG00000045954	109.753951608155	2.90944530118753	5.58118019731208e-06	Cavin2
ENSMUSG00000027314	33.9799672784603	2.90912789435528	1.4156096757314e-09	Dll4
ENSMUSG00000038370	35.3339729366121	2.90852211517882	9.52583521481391e-06	Pcp4l1
ENSMUSG00000029163	34.5388274681596	2.90373859069238	6.92756958153219e-14	Emilin1
ENSMUSG00000038298	14.0014332009679	2.90368738793253	5.96764882251606e-05	Pdzk1
ENSMUSG00000104213	9.69564587011661	2.90348928554785	0.000147510243599194	NA
ENSMUSG00000022876	233.982561493308	2.90235995362947	2.61322330855714e-09	Samsn1
ENSMUSG00000091649	10.6984069899461	2.89991222685666	1.89152779410422e-05	Phf11b
ENSMUSG00000015134	152.200234242519	2.89879022509914	4.98055791913361e-17	Aldh1a3
ENSMUSG00000035208	88.6525541892112	2.89829953738109	3.79818663524027e-10	Slfn8
ENSMUSG00000071656	82.3823245516519	2.89771696953826	3.01884191387671e-22	Lrrn4cl
ENSMUSG00000031626	10.7784523996683	2.89625225239026	4.03222491811055e-05	Sorbs2
ENSMUSG00000000794	12.5980012368007	2.8953676333259	0.000495123323142526	Kcnn3
ENSMUSG00000043518	7.01898863962261	2.87765676660985	0.00217858385818798	Rai2
ENSMUSG00000034416	4.88833359867964	2.87503463938245	0.000872925788160035	Pkd1l2
ENSMUSG00000036570	21.3227915481121	2.87283555512324	1.71002845289857e-08	Fxyd1
ENSMUSG00000006457	15.8813158781487	2.87204962970671	0.000114160901157948	Actn3
ENSMUSG00000027669	22.377000134399	2.86723589567522	3.86657312161016e-09	Gnb4
ENSMUSG00000020814	19.9503085673169	2.86485425046903	9.75688355558378e-08	Mxra7
ENSMUSG00000022014	49.6907694430886	2.85868902398527	2.42626248630284e-08	Epsti1
ENSMUSG00000036896	61.8140418680399	2.85671425726982	5.54632146881782e-08	C1qc
ENSMUSG00000060923	14.9248328558529	2.85469556828458	3.63488683495362e-06	Acyp2
ENSMUSG00000024526	235.157365091492	2.84431739538538	4.13911696671909e-13	Cidea
ENSMUSG00000032322	117.261410970119	2.84161320029659	9.77639373805344e-14	Pstpip1
ENSMUSG00000027221	19.1957589746923	2.84149785292366	0.00292624493929975	Chst1
ENSMUSG00000082815	7.06428911183657	2.83084346385226	0.00309774720661149	NA
ENSMUSG00000015476	8.1725353793143	2.82791753367258	0.000286309215182988	Prrt1
ENSMUSG00000016529	59.7599123080406	2.82500210425063	7.2164346068122e-06	Il10
ENSMUSG00000017466	784.065930461153	2.82457759204669	8.66705158742369e-26	Timp2
ENSMUSG00000001930	65.6746657852827	2.82104245013007	1.44876520184018e-13	Vwf
ENSMUSG00000031844	24.5466280651314	2.81830447384071	4.77590912731527e-08	Hsd17b2
ENSMUSG00000032315	42.177497901682	2.81771739834943	5.78713235454603e-07	Cyp1a1
ENSMUSG00000021998	1103.10939490243	2.8170525855575	4.27360505253085e-10	Lcp1
ENSMUSG00000099889	13.5187048350823	2.80953278381938	0.00211591448120329	NA
ENSMUSG00000106734	72.4381457541298	2.80670908951859	1.6455904050846e-12	NA
ENSMUSG00000024300	132.046889059127	2.80179680327496	8.51469081277157e-11	Myo1f
ENSMUSG00000028073	59.3496265684778	2.7982838059694	3.01749625024679e-11	Pear1
ENSMUSG00000036944	11.9701097692719	2.79817543929186	0.000332894634578693	Tmem71
ENSMUSG00000038663	9.05709256608103	2.79798120314539	0.000323353727976956	Fsd2
ENSMUSG00000004730	84.6508064869759	2.79638081772296	4.86342287791027e-13	Adgre1
ENSMUSG00000031216	18.97088180933	2.79617376302144	8.48647065474202e-08	Stard8
ENSMUSG00000050071	23.23128151781	2.79067623967692	4.84445825783779e-11	Bex1
ENSMUSG00000027217	121.922001599793	2.79066461471299	5.86300997776889e-06	Tspan18
ENSMUSG00000089929	10.3279207768381	2.7880057043054	6.48887357036499e-05	Bcl2a1b
ENSMUSG00000040528	22.2050577028136	2.78724124118089	2.33340824281736e-07	Milr1
ENSMUSG00000075122	52.8122501163388	2.78586025234098	1.82961355102683e-10	Cd80
ENSMUSG00000022102	57.3263812678533	2.78322639580186	4.23236100802336e-10	Dok2
ENSMUSG00000005994	29.1693658439628	2.78199968170521	8.95482305682826e-08	Tyrp1
ENSMUSG00000038517	45.9083464036501	2.7781879973133	1.58622294667033e-12	Tbkbp1
ENSMUSG00000024399	32.6685306209352	2.77766487228131	3.68362278550738e-07	Ltb
ENSMUSG00000010476	15.9750211516028	2.77700622391177	1.8547052202832e-07	Ebf3
ENSMUSG00000002233	168.099494025398	2.77582469965106	4.00824403248161e-20	Rhoc
ENSMUSG00000105196	10.013817410481	2.77163686453828	0.000324006025223332	Mir142
ENSMUSG00000029659	61.9635454045254	2.76767649579671	1.12796633640182e-15	Medag
ENSMUSG00000068452	37.4367326234249	2.76671220035333	1.20673306390788e-07	Duox2
ENSMUSG00000012017	39.3923117795116	2.76378347315917	9.94746921339027e-11	Scarf2
ENSMUSG00000063727	47.4447221094501	2.76034832142423	4.68263354449538e-18	Tnfrsf11b
ENSMUSG00000038642	564.348474379729	2.75962914848706	4.3132171896497e-10	Ctss
ENSMUSG00000022099	30.7312647610753	2.75846282757476	2.98702754832978e-11	Dmtn
ENSMUSG00000060703	34.9088682525181	2.75186064579222	4.1080160414412e-13	Cd302
ENSMUSG00000032363	12.4569270021298	2.75057333053594	2.01728058982347e-05	Adamts7
ENSMUSG00000024679	106.349974481773	2.74932411315429	1.8279813541765e-13	Ms4a6d
ENSMUSG00000060459	6.33193761636314	2.74523304148316	0.000188765235598314	Kng2
ENSMUSG00000028132	214.950478074512	2.74509315529491	1.10684350580401e-18	Tmem56
ENSMUSG00000029664	5.84671456872158	2.74438167650124	0.000642362294860237	Tfpi2
ENSMUSG00000022372	47.8321304395999	2.73680652754321	5.49747130136423e-09	Sla
ENSMUSG00000032085	51.8412013777136	2.73670335559029	7.5532063875414e-12	Tagln
ENSMUSG00000020638	80.8641342358464	2.73296896083561	4.80092070378063e-07	Cmpk2
ENSMUSG00000096257	158.782037047632	2.73259562197443	2.02487527464095e-15	Ccer2
ENSMUSG00000027792	49.3972179557212	2.73112090311149	1.91621912779571e-11	Bche
ENSMUSG00000045763	351.878545229702	2.723919425864	1.32850023387968e-09	Basp1
ENSMUSG00000044092	6.74956424188777	2.71821342779418	0.00253259670778777	C130050O18Rik
ENSMUSG00000033213	12.6389575801461	2.71792493042038	1.70104209010469e-05	AA467197
ENSMUSG00000018819	534.501602698445	2.71505042656246	4.15198969761132e-17	Lsp1
ENSMUSG00000042129	84.1931193012253	2.714054037713	3.19187132195643e-08	Rassf4
ENSMUSG00000021624	15.0730925699349	2.71342063971459	0.000652735882675151	Cd180
ENSMUSG00000097113	5.18044927795121	2.71143782595805	0.00251714425040724	Gm19705
ENSMUSG00000027995	510.728173467444	2.70766086898587	1.62935885125486e-10	Tlr2
ENSMUSG00000057722	13.9216992252933	2.70481620038968	1.18526978904294e-05	Lepr
ENSMUSG00000003665	353.850533110711	2.69835919032369	2.13298163813862e-19	Has1
ENSMUSG00000024806	5.16423915018537	2.69551015689955	0.00614425156963142	Mlana
ENSMUSG00000034675	63.9685918338973	2.69293080718057	2.15345450007956e-10	Dbn1
ENSMUSG00000078771	59.4694522116732	2.69122841592604	2.37188039393337e-09	Evi2a
ENSMUSG00000040613	85.8060977844081	2.68898326706672	1.8653307427266e-12	Apobec1
ENSMUSG00000015766	152.391708913451	2.67885156932174	1.66356843561505e-16	Eps8
ENSMUSG00000028926	34.4378665432674	2.67845099267421	8.82460355489765e-07	Cdk14
ENSMUSG00000042759	139.813747612527	2.67618779487097	3.20189499974116e-11	Apobr
ENSMUSG00000010651	37.3566626354379	2.66692994800646	9.64955022371667e-06	Acaa1b
ENSMUSG00000011256	101.376632712147	2.66218459011799	1.50881756392662e-14	Adam19
ENSMUSG00000030268	9.15747387203942	2.65434517242742	0.00025981135901007	Bcat1
ENSMUSG00000028599	1014.48213743144	2.65350420051214	1.28521242560476e-10	Tnfrsf1b
ENSMUSG00000052374	19.6926605342766	2.6524005301988	0.000418174380033381	Actn2
ENSMUSG00000016194	24.7242242994138	2.63678673698057	5.80048604658037e-06	Hsd11b1
ENSMUSG00000000317	35.966897549325	2.6308353016841	2.72663873963967e-11	Bcl6b
ENSMUSG00000019997	544.105083285451	2.62790936300856	6.4169364109356e-18	Ccn2
ENSMUSG00000045382	359.081894258985	2.6207968416062	7.78347441918356e-16	Cxcr4
ENSMUSG00000000392	18.0296797896828	2.61993614232502	3.39724553274277e-06	Fap
ENSMUSG00000055413	40.5756050342697	2.6199132892641	5.52762379357327e-11	H2-Q5
ENSMUSG00000029254	27.0321854745921	2.61920278941452	5.82771872645391e-07	Stap1
ENSMUSG00000033450	37.6329250075216	2.61711076509344	6.45207695854052e-07	Tagap
ENSMUSG00000046318	5.43613597504979	2.61676683344764	0.00695155559004668	Ccbe1
ENSMUSG00000064325	12.2891209220964	2.61399193277973	0.0063968411941285	Hhip
ENSMUSG00000044405	14.390582247469	2.61352769279634	1.07867656816678e-05	Adig
ENSMUSG00000036905	71.8608949147531	2.61332076697687	1.02453772840691e-10	C1qb
ENSMUSG00000022332	18.15844212321	2.60331865524463	1.16354185701397e-07	Khdrbs3
ENSMUSG00000041538	9.1258358501214	2.59173452177677	0.00359390827150308	H2-Ob
ENSMUSG00000031327	4.61623653741023	2.59170807846698	0.0057275316686298	Chic1
ENSMUSG00000025202	477.915748855496	2.58523320971629	5.26932714122911e-18	Scd3
ENSMUSG00000050064	5.18367890718922	2.58489337308957	0.00742531530159224	Zfp697
ENSMUSG00000026811	27.1097221269789	2.5838265148353	6.23048080537628e-08	St6galnac6
ENSMUSG00000021281	1236.79928817525	2.58104100412638	6.50983495462865e-10	Tnfaip2
ENSMUSG00000027962	47.0574084823302	2.58077154237164	1.46263260759591e-14	Vcam1
ENSMUSG00000022129	58.2298301354425	2.57811838626894	1.33129301239609e-12	Dct
ENSMUSG00000054598	6.9260332105086	2.57309164622714	0.00199012328345975	9130230L23Rik
ENSMUSG00000026825	73.2642480819586	2.57029905882	9.76624555228735e-14	Dnm1
ENSMUSG00000032826	28.12765701507	2.56834916475416	3.34592951074352e-08	Ank2
ENSMUSG00000082433	9.64749777480105	2.56695429978121	0.000416782171934121	NA
ENSMUSG00000038147	96.940803558568	2.56440867156	8.86600596573519e-16	Cd84
ENSMUSG00000015665	141.025126588099	2.56346138008155	5.20847194809576e-13	Awat1
ENSMUSG00000095369	5.20450553033004	2.56317480249015	0.00358771805033663	Gm21859
ENSMUSG00000029126	156.801591037753	2.56104078617187	5.15912465450215e-13	Nsg1
ENSMUSG00000000244	6.89977305535368	2.55992642402493	0.000797053861456849	Tspan32
ENSMUSG00000017929	261.334742768733	2.55836860553304	6.71856565517136e-17	B4galt5
ENSMUSG00000041540	12.4399597870215	2.55768887140565	3.45637877806533e-05	Sox5
ENSMUSG00000026786	153.832089317929	2.54189145057528	6.74409315652294e-11	Apbb1ip
ENSMUSG00000034612	83.6529185493251	2.53692846168545	4.65744921008955e-08	Chst11
ENSMUSG00000026728	4960.6314396174	2.53620368577321	1.33550740812979e-11	Vim
ENSMUSG00000081362	32.7086677293675	2.52841154443038	1.18572875261803e-05	NA
ENSMUSG00000052942	33.5189601733638	2.52119609758101	7.5532063875414e-12	Glis3
ENSMUSG00000027015	11.5458830802307	2.51485468880867	0.00348919083627231	Cybrd1
ENSMUSG00000032089	226.355620116926	2.50887399037344	2.38132718327856e-14	Il10ra
ENSMUSG00000112794	48.0071930327542	2.50587670282514	2.69568131818271e-05	NA
ENSMUSG00000060044	16.1075558708046	2.50170913771477	1.36732231963707e-05	Tmem26
ENSMUSG00000046314	19.9379439376476	2.49447628336478	4.66942001734405e-06	Stxbp6
ENSMUSG00000037913	13.4007266420675	2.49128364463119	4.29734269974162e-07	Tmem156
ENSMUSG00000087107	19.5787646953686	2.49051061714342	1.13913488488902e-05	AI662270
ENSMUSG00000062585	17.6561230976043	2.48812912985422	0.000435781571770693	Cnr2
ENSMUSG00000016087	40.3554598681782	2.48782675225625	1.63103602427843e-10	Fli1
ENSMUSG00000047945	1431.21594145077	2.48633861405567	1.36137438164965e-16	Marcksl1
ENSMUSG00000031586	66.0922071137429	2.48576736251406	1.0912910213872e-13	Rbpms
ENSMUSG00000036067	183.574692296764	2.48447610312666	2.37472854506962e-09	Slc2a6
ENSMUSG00000021298	325.388652710367	2.4809840369656	1.06808597750908e-12	Gpr132
ENSMUSG00000033453	27.4455257612975	2.47919528691208	1.32349296744558e-06	Adamts15
ENSMUSG00000026068	116.616300204162	2.47729790185357	8.0531955384149e-11	Il18rap
ENSMUSG00000045165	19.0363575446856	2.4672868528577	0.000355960450630651	AI467606
ENSMUSG00000002020	54.7354460577791	2.46436015985749	1.36962399424941e-12	Ltbp2
ENSMUSG00000034959	14.9597738188305	2.46272255881843	4.92791600336547e-05	Rubcnl
ENSMUSG00000040212	253.433690392846	2.46270291164452	2.92593149854576e-23	Emp3
ENSMUSG00000042041	6.81214013490471	2.46055502590277	0.00353844669993373	2010003K11Rik
ENSMUSG00000040950	22.4368027778846	2.45903992694499	0.000238506504368444	Mgl2
ENSMUSG00000031875	102.819697011195	2.45085618252906	8.25683139493279e-24	Cmtm3
ENSMUSG00000075284	188.355947096044	2.45057597847562	4.39277784467201e-12	Wipf1
ENSMUSG00000026875	233.55335584001	2.44965139481502	2.89104255762046e-10	Traf1
ENSMUSG00000020123	212.069662014857	2.44806353973306	0.00045778069715015	Avpr1a
ENSMUSG00000029576	11.7715630739626	2.44364000775154	4.15393324340562e-06	Radil
ENSMUSG00000001802	17.9737991534811	2.4423774787741	7.33936800407081e-05	Lrp3
ENSMUSG00000034786	83.1887220878725	2.44210124398718	1.14660017871663e-15	Gpsm3
ENSMUSG00000048621	56.5732154407666	2.43818988434072	3.56700550231309e-09	Gm6377
ENSMUSG00000028469	68.3338056380366	2.43742260436639	1.51931493351877e-12	Npr2
ENSMUSG00000000682	262.163280751962	2.43722439281037	8.85730359058714e-12	Cd52
ENSMUSG00000062939	11.3918220184824	2.43675413553737	0.000204785432540296	Stat4
ENSMUSG00000009687	700.365549012616	2.43544383446149	8.22931110517996e-14	Fxyd5
ENSMUSG00000023961	18.9863064098756	2.43248988871014	1.52577676341263e-06	Enpp4
ENSMUSG00000031503	530.943326233105	2.42989060544417	4.98077611478015e-25	Col4a2
ENSMUSG00000035385	624.727424169845	2.42975794544188	1.53455095154782e-05	Ccl2
ENSMUSG00000060568	15.9993686277067	2.42579413996768	2.37631224265968e-08	Fam78b
ENSMUSG00000001864	47.3994627808528	2.4252817669159	1.4255142570651e-10	Aif1l
ENSMUSG00000060572	26.8050653909524	2.42365794974842	0.00340142171137462	Mfap2
ENSMUSG00000045664	51.887934697341	2.4173036631085	4.67642069887788e-11	Cdc42ep2
ENSMUSG00000071715	171.578352272137	2.41711369665887	1.05747228678084e-11	Ncf4
ENSMUSG00000022148	146.497848171466	2.41655843751193	5.07652118850145e-11	Fyb
ENSMUSG00000063605	24.1636992506373	2.41621245588226	5.67404403732815e-09	Ccdc102a
ENSMUSG00000076617	70.8325901799059	2.4155946088386	5.62750676385243e-05	NA
ENSMUSG00000099974	34.6479514922787	2.40981599474959	2.09117667488392e-06	Bcl2a1d
ENSMUSG00000029204	25.1103785854183	2.40930325837388	1.75215601499094e-05	Rhoh
ENSMUSG00000025666	26.0286839086537	2.40304653269169	3.63889822873926e-12	Tmem47
ENSMUSG00000040447	125.488694906828	2.38999605152263	7.51161162853295e-12	Spns2
ENSMUSG00000042993	9.80136317646514	2.38238740477884	0.00102166802327889	Ifnk
ENSMUSG00000032596	120.633725345587	2.38186914483792	2.752028383111e-07	Uba7
ENSMUSG00000025978	12.3856108032963	2.37914259466056	3.36390734432981e-05	Rftn2
ENSMUSG00000073412	30.9964778508256	2.37907054991448	2.44661496371628e-06	Lst1
ENSMUSG00000003418	7.52410251346762	2.37846503550432	0.00443578974181932	St8sia6
ENSMUSG00000084796	20.2015612401838	2.37309787740744	0.000349335838168735	NA
ENSMUSG00000014164	6.4637920542661	2.36851639218716	0.00951592775445881	Klhl3
ENSMUSG00000036353	6.71518493467107	2.36639051307271	0.00554151668989752	P2ry12
ENSMUSG00000000958	33.564212219838	2.35650592342634	1.76702350552041e-11	Slc7a7
ENSMUSG00000026249	157.586530746137	2.34868057207888	6.30891145904516e-15	Serpine2
ENSMUSG00000024534	11.8352203068935	2.34341305023977	0.000789915041128538	Sncaip
ENSMUSG00000061353	437.821267775936	2.34338710250866	3.440357595025e-18	Cxcl12
ENSMUSG00000020178	24.1087220898574	2.33881389786101	4.07665147965299e-05	Adora2a
ENSMUSG00000020674	131.283404238493	2.33860550752583	1.21877567662415e-08	Pxdn
ENSMUSG00000027875	222.06982876855	2.33612848734751	1.03511010909443e-11	Hmgcs2
ENSMUSG00000073409	123.484949533177	2.33437107437103	1.73013103516894e-10	H2-Q6
ENSMUSG00000055805	794.090451761645	2.33295812335313	2.1716439157641e-08	Fmnl1
ENSMUSG00000026073	2651.37743193918	2.33232493326908	6.82792083936097e-14	Il1r2
ENSMUSG00000049112	109.776371539043	2.33002108547709	0.00275599458096277	Oxtr
ENSMUSG00000097636	56.174682284872	2.32727981556046	8.53136522643712e-08	NA
ENSMUSG00000030638	8.65266263920446	2.32499086636514	0.000514231723606686	Sh3gl3
ENSMUSG00000021125	371.641647031002	2.32400062559485	8.0703579847342e-11	Arg2
ENSMUSG00000024897	14.8493697792446	2.3205276390557	0.000904272911722658	Apba1
ENSMUSG00000026042	647.483746724424	2.31821577013929	3.68563848954329e-19	Col5a2
ENSMUSG00000002204	126.483734372845	2.31188380349923	6.33712528126200e-11	Napsa
ENSMUSG00000039316	43.1810342032331	2.31106071552606	7.78102760527301e-08	Rftn1
ENSMUSG00000024986	26.8113574518643	2.30948778996767	9.71121166540323e-10	Hhex
ENSMUSG00000060470	152.338220173615	2.30832974947514	7.70400921120194e-10	Adgrg3
ENSMUSG00000070609	152.378115120228	2.30832374980334	4.32729024723459e-14	Aadacl4
ENSMUSG00000083161	6.4505761055605	2.30220046131229	0.00336991671438579	NA
ENSMUSG00000031264	39.7922136242037	2.29710268388674	1.30200108734001e-05	Btk
ENSMUSG00000028268	84.5515018248888	2.29481598782302	3.07255315723781e-08	Gbp3
ENSMUSG00000030428	7.85793427352822	2.28661560287899	0.000350539717558085	Ttyh1
ENSMUSG00000002668	95.9285492193709	2.28637410764409	5.54079822646201e-08	Dennd1c
ENSMUSG00000056124	40.9290066851796	2.28345217249055	3.2468373357514e-07	B4galt6
ENSMUSG00000068220	361.872798456791	2.28316993174494	5.46934297398347e-13	Lgals1
ENSMUSG00000037946	167.066030344637	2.281196457116	7.82404300144684e-09	Fgd3
ENSMUSG00000031289	31.0036934517414	2.28099441050308	1.07445226893937e-07	Il13ra2
ENSMUSG00000039934	65.9393046080499	2.27988548049806	7.29433496608767e-10	Gsap
ENSMUSG00000024798	5.46605974462975	2.27805673370567	0.00648228942343816	Htr7
ENSMUSG00000033880	262.166387069983	2.27764830320574	1.28336460428606e-13	Lgals3bp
ENSMUSG00000031502	758.426971026926	2.27740772024898	4.7121098510016e-17	Col4a1
ENSMUSG00000063354	18.8098811451563	2.27699162688912	0.000510510470470042	Slc39a4
ENSMUSG00000002475	29.9310747241168	2.27006924158343	1.4592541417222e-10	Abhd3
ENSMUSG00000024451	183.348237483228	2.26364944737936	3.20189499974116e-11	Arap3
ENSMUSG00000043099	22.5393846047945	2.25822833179947	4.95593729410195e-07	Hic1
ENSMUSG00000009585	66.7792407603127	2.2570612966233	5.13622887291028e-09	Apobec3
ENSMUSG00000037348	1306.12625711502	2.25466088759799	8.83560928923862e-24	Paqr7
ENSMUSG00000026833	109.89142333511	2.25393581410548	1.31305218827495e-18	Olfm1
ENSMUSG00000033436	35.7848933614887	2.25313257575157	9.0582043378032e-08	Armcx2
ENSMUSG00000004661	22.3025086124719	2.25117646684945	1.47313111181248e-07	Arid3b
ENSMUSG00000056888	37.178414148357	2.25101300431668	2.75717411445574e-05	Glipr1
ENSMUSG00000047810	265.096094223206	2.24766845183461	3.56642328780879e-10	Ccdc88b
ENSMUSG00000086567	6.14066751167914	2.24617810888924	0.00549577392705113	NA
ENSMUSG00000032511	11.6993383373826	2.24579017219259	0.00228979556447416	Scn5a
ENSMUSG00000079363	29.9395673797668	2.24366960847389	1.10530332841197e-05	Gbp4
ENSMUSG00000002504	51.0850048270326	2.24196864938233	3.76347067808787e-07	Slc9a3r2
ENSMUSG00000024065	32.1818766265187	2.23973877231001	3.633774385478e-05	Ehd3
ENSMUSG00000071713	704.964716799208	2.23869786429733	1.32167883799371e-07	Csf2rb
ENSMUSG00000024084	28.8152644200446	2.23495923048851	1.0787103089004e-08	Qpct
ENSMUSG00000085894	115.204780310939	2.23492783003684	2.55872979028323e-08	NA
ENSMUSG00000068699	114.231770735974	2.2328139345857	1.89002987889202e-11	Flnc
ENSMUSG00000048534	86.6142137619557	2.22866462554215	1.02089397339849e-08	Jaml
ENSMUSG00000068335	35.9312696438335	2.22825763559049	2.05262558324088e-08	Dok1
ENSMUSG00000040260	10.6043747928619	2.22780032090805	0.00411709067586419	Daam2
ENSMUSG00000069892	14.6865027532301	2.22360667724874	0.000837081053398902	9930111J21Rik2
ENSMUSG00000040345	118.283491007704	2.2233648876369	3.08419910235189e-09	Arhgap9
ENSMUSG00000021262	150.32613387263	2.22313103963201	1.58120558438104e-10	Evl
ENSMUSG00000059588	73.9822333451718	2.22265986941268	1.30855507760012e-10	Calcrl
ENSMUSG00000026395	714.935275685263	2.22159364008595	6.40766122840961e-11	Ptprc
ENSMUSG00000041361	35.0673981660871	2.21880021418554	2.01346730829905e-08	Myzap
ENSMUSG00000062591	12.0704916185235	2.21715278845522	3.53771165629523e-05	Tubb4a
ENSMUSG00000019577	866.821184720327	2.21501802581215	3.32860612932545e-08	Pdk4
ENSMUSG00000032690	189.347421934796	2.21493808693061	6.21579137555254e-05	Oas2
ENSMUSG00000048865	196.842570948829	2.21313142123365	3.1431910682986e-09	Arhgap30
ENSMUSG00000050530	30.5125339344308	2.21189490213151	5.68544939605493e-08	Fam171a1
ENSMUSG00000011148	72.7146047422832	2.20745555973804	6.33933606100439e-12	Adssl1
ENSMUSG00000041117	17.1580507611339	2.20714125282886	0.000475397442235901	Ccdc8
ENSMUSG00000020019	166.497034485674	2.20174101396189	1.66186339921835e-18	Ntn4
ENSMUSG00000031165	61.1869487766193	2.20044735969201	5.59389746719612e-08	Was
ENSMUSG00000032714	57.2011176347267	2.19446145772554	7.70965894323041e-12	Syde1
ENSMUSG00000031497	10.313356270486	2.19308673540135	0.00429282304179599	Tnfsf13b
ENSMUSG00000038811	54.2601422435936	2.19198540171282	1.47668676987565e-09	Gngt2
ENSMUSG00000100215	14.0237243723468	2.19126088702909	3.75758106405651e-06	NA
ENSMUSG00000042010	411.934369079165	2.18526795934475	8.13528860896896e-24	Acacb
ENSMUSG00000005057	212.606273624175	2.18401733976552	1.94371749078518e-07	Sh2b2
ENSMUSG00000038910	51.5071420806308	2.18384584389057	5.2950233264145e-07	Plcl2
ENSMUSG00000026840	16.1837425847482	2.18209523966725	0.00620838530226193	Lamc3
ENSMUSG00000063661	61.9869701391354	2.17940822153424	9.12096280826202e-05	Krt73
ENSMUSG00000050052	30.0771143603278	2.17906556480156	4.68193459558422e-08	Tdrp
ENSMUSG00000024696	53.0123122012111	2.17688974782789	3.40110736481082e-11	Lpxn
ENSMUSG00000078670	75.2856326286782	2.17603706804974	1.33005700003235e-09	Fam174b
ENSMUSG00000042532	32.3156777860959	2.16451897456522	0.00136566763968121	Golga7b
ENSMUSG00000020473	440.200435371253	2.1606860986338	1.10259824267836e-25	Aebp1
ENSMUSG00000050931	713.528112573257	2.1606800449908	1.42976931819692e-07	Sgms2
ENSMUSG00000043727	22.8473284490986	2.15752366506874	0.00927520471700771	F830045P16Rik
ENSMUSG00000030022	135.325309640499	2.15316468849036	1.60955518156717e-10	Adamts9
ENSMUSG00000043259	11.771484952082	2.15192472923367	0.000372558814130665	Fam13c
ENSMUSG00000076433	10.1731426066204	2.14915648674909	0.00252540378729998	Cep295nl
ENSMUSG00000027009	79.7386336695349	2.14794735838468	2.07389039732802e-08	Itga4
ENSMUSG00000027800	589.443954171751	2.14743234106022	4.52990085973376e-06	Tm4sf1
ENSMUSG00000000562	20.5592957655528	2.14602426897238	7.5799978194288e-05	Adora3
ENSMUSG00000006269	73.2842264307167	2.13918796037196	0.000452852562185765	Atp6v1b1
ENSMUSG00000056025	161.018740141639	2.13472976398265	1.28860593234278e-11	Clca3a1
ENSMUSG00000022488	239.384275590514	2.13315941024168	8.11204701766347e-08	Nckap1l
ENSMUSG00000030830	194.294367677628	2.1327012817929	2.55459125187996e-08	Itgal
ENSMUSG00000036661	56.8592766105473	2.12923967589181	0.000139695752942649	Dennd3
ENSMUSG00000004707	14.8011692739225	2.12706176125508	0.00098371750175788	Ly9
ENSMUSG00000027339	93.8901863867372	2.12683081301337	5.33348770197001e-11	Rassf2
ENSMUSG00000055541	15.380083532029	2.12584992490968	0.000172389114424044	Lair1
ENSMUSG00000031803	17.2116146217047	2.1221635284332	0.000297069754154469	B3gnt3
ENSMUSG00000067594	3125.41281228815	2.11781487927047	4.5259430229298e-05	Krt77
ENSMUSG00000033327	1624.4237155772	2.11570853228924	1.21627810184676e-06	Tnxb
ENSMUSG00000009394	16.7042490243488	2.11233119650873	0.00144452062857642	Syn2
ENSMUSG00000022208	8.68571404184222	2.11122514201132	0.000808089681698757	Jph4
ENSMUSG00000023947	503.906734559207	2.11086920782831	1.86752445956267e-10	Nfkbie
ENSMUSG00000018916	19.235236239826	2.11048980404953	0.00153076810528471	Csf2
ENSMUSG00000020866	68.1112525057719	2.10978402966204	3.12399472666929e-10	Cacna1g
ENSMUSG00000028494	2369.05607775996	2.10838288916413	1.3476053555982e-18	Plin2
ENSMUSG00000020900	23.4327141658946	2.10752934755705	5.70205600609252e-08	Myh10
ENSMUSG00000008734	62.7305586938564	2.10741250519755	2.58694902778873e-10	Gprc5b
ENSMUSG00000035711	136.272823276437	2.1063914355243	8.91515502491953e-11	Dok3
ENSMUSG00000015355	38.5820556825534	2.10503648214596	1.29225606711139e-07	Cd48
ENSMUSG00000001227	33.926216683862	2.10439804301433	8.67942430812088e-06	Sema6b
ENSMUSG00000048332	68.9859681392398	2.10268941921454	1.53144600342102e-10	Lhfp
ENSMUSG00000034520	24.0899197782703	2.10226435494245	3.92878007716477e-05	Gjc1
ENSMUSG00000023046	528.586323969233	2.10034945964133	1.5145981180802e-16	Igfbp6
ENSMUSG00000052760	15.8577296860154	2.10020988586029	0.00249362707687324	A630001G21Rik
ENSMUSG00000031506	59.5687092839218	2.09739945440805	1.67757059703808e-11	Ptpn7
ENSMUSG00000001281	194.565862934607	2.09478061016481	9.90791810126963e-11	Itgb7
ENSMUSG00000028583	514.217359161696	2.09201352679998	7.24613412561431e-14	Pdpn
ENSMUSG00000033491	22.9637697687381	2.08876789882318	0.00841136797831343	Prss35
ENSMUSG00000060131	78.3004701714554	2.0877514920505	2.21853655969289e-07	Atp8b4
ENSMUSG00000062980	44.2098079558857	2.08661040462668	9.74294266045225e-12	Cped1
ENSMUSG00000036356	277.747655084034	2.0853493621124	8.30208979990094e-10	Csgalnact1
ENSMUSG00000056978	12.7973929815772	2.08068119899154	0.00916820144917874	Hamp2
ENSMUSG00000087400	9.70304431871685	2.07838125301714	0.00201017050686589	NA
ENSMUSG00000031558	9.62880744070915	2.07475292417542	0.00748091185333644	Slit2
ENSMUSG00000038668	60.1071022936448	2.07369162058467	5.84391337072764e-11	Lpar1
ENSMUSG00000029311	98.4323243650789	2.07299950565567	1.63605942145958e-09	Hsd17b11
ENSMUSG00000021751	48.4016302861255	2.07233927750224	4.75917913908126e-05	Acox2
ENSMUSG00000028927	25.1815981443714	2.07220881237244	0.000434605038165654	Padi2
ENSMUSG00000064065	22.0723751000481	2.07184390957556	0.00271291802178718	Ipcef1
ENSMUSG00000002885	369.7223044868	2.06620475575233	1.81310570562377e-13	Adgre5
ENSMUSG00000037225	28.9441267108771	2.06504489956607	4.40927849831357e-06	Fgf2
ENSMUSG00000085126	14.6206550209505	2.06232007061395	0.00114776867998489	Gm12589
ENSMUSG00000087364	16.7512666900032	2.06126695476825	0.000889220418131089	NA
ENSMUSG00000038677	27.0126727096183	2.05850649706777	0.0013804701197732	Scube3
ENSMUSG00000031438	36.0235149924842	2.05590920361718	1.93366105996174e-07	Rnf128
ENSMUSG00000020272	83.9945944651598	2.05181664908273	9.06119814043445e-10	Stk10
ENSMUSG00000040650	22.3941629567291	2.05137164408464	0.000169393384166705	Cyp2b23
ENSMUSG00000047793	445.073891275014	2.05060770022907	6.16437443104177e-16	Sned1
ENSMUSG00000034037	62.2811630853768	2.04700768086834	2.32514377325936e-06	Fgd5
ENSMUSG00000030551	72.4112524012342	2.04668903342495	4.57598836494591e-13	Nr2f2
ENSMUSG00000038623	120.030625441974	2.04449200259305	8.42140779581603e-08	Tm6sf1
ENSMUSG00000021886	30.7766393032574	2.04209171401615	3.40758729983066e-05	Gpr65
ENSMUSG00000006958	10.8403603313969	2.03788209920247	0.00210762356551279	Chrd
ENSMUSG00000024743	7.77104957538101	2.0376477169984	0.0021013696951704	Syt7
ENSMUSG00000021384	8.96872005396073	2.03749648397625	0.0053866023760283	Susd3
ENSMUSG00000019467	50.897449861048	2.03561433263733	0.000185398427059	Arhgef25
ENSMUSG00000038301	78.877930838097	2.03037262994079	1.47084269457e-09	Snx10
ENSMUSG00000030745	30.5422858682615	2.02729420194501	1.66459886597043e-07	Il21r
ENSMUSG00000078945	32.6702215223774	2.02522473606359	2.42444209674214e-06	Naip2
ENSMUSG00000000901	23.115811767974	2.02303576218457	0.00048643713145948	Mmp11
ENSMUSG00000060550	105.102587827789	2.02249348603312	3.08313897806988e-07	H2-Q7
ENSMUSG00000022439	48.6533693483486	2.00728213516502	1.31299613002694e-06	Parvg
ENSMUSG00000034116	173.824881327016	2.00677429764665	1.76572308786656e-10	Vav1
ENSMUSG00000021207	69.383592902879	2.00153592268816	4.37743604265889e-06	Akr1c21
ENSMUSG00000052384	126.667238842361	2.00150131457293	2.53078123479863e-09	Nrros
ENSMUSG00000060560	128.5252518433	1.99900942217053	6.53316526118604e-09	Ces4a
ENSMUSG00000040428	96.9594380443351	1.99605740974722	2.40456365459195e-11	Plekha4
ENSMUSG00000075702	48.1124830356824	1.99340470884398	9.24088754331802e-08	Selenom
ENSMUSG00000054720	56.3266548291711	1.98927724490224	1.88963975953396e-09	Lrrc8c
ENSMUSG00000057672	175.702474637697	1.98628859066808	6.18811437043212e-10	Pkn1
ENSMUSG00000022309	12.1613485888342	1.98475923405144	0.00178640618281112	Angpt1
ENSMUSG00000046417	24.7543846410372	1.98470926043431	5.24801942523642e-06	Lrrc75a
ENSMUSG00000048583	100.727422660568	1.97724057018094	8.56148868213851e-09	Igf2
ENSMUSG00000030223	50.1328680888758	1.97531274346668	3.75758106405651e-06	Ptpro
ENSMUSG00000039377	38.3103249446011	1.97468245080099	6.14693175172122e-06	Hlx
ENSMUSG00000031610	21.9989721622307	1.97218306816403	0.00480920082715687	Scrg1
ENSMUSG00000022235	15.9340639109488	1.96977124753946	0.000197002114121729	Cmbl
ENSMUSG00000037892	11.1032615871448	1.96627676879089	0.00395881190140975	Pcdh18
ENSMUSG00000016496	319.024226659987	1.96489886582092	2.83482778759663e-09	Cd274
ENSMUSG00000003420	197.037907115548	1.96017939764399	4.15198969761132e-17	Fcgrt
ENSMUSG00000034258	16.3073600596125	1.95992197418328	4.44383892079839e-05	Flvcr2
ENSMUSG00000041220	5138.29937676071	1.95652368742924	9.82408599794108e-20	Elovl6
ENSMUSG00000036362	15.2167021606842	1.95651536837129	0.000498004195841051	P2ry13
ENSMUSG00000018169	13.5093611172239	1.95485188107169	0.000355838481879791	Mfng
ENSMUSG00000024180	19.0359530646769	1.95472352631525	0.000563117162098481	Tmem8
ENSMUSG00000020102	50.4697547172211	1.95441729186222	6.30247574931538e-05	Slc16a7
ENSMUSG00000038271	45.524409761337	1.95410946112064	5.74480470699151e-07	Iffo1
ENSMUSG00000035692	350.000312101891	1.95143606449909	0.000393668439291783	Isg15
ENSMUSG00000030798	118.133883235729	1.94993829511005	7.05157986152089e-11	Cd37
ENSMUSG00000035863	276.84345047819	1.94873185541167	6.55571233750158e-07	Palm
ENSMUSG00000027254	7.59341473048038	1.94765320524494	0.00581782484678748	Map1a
ENSMUSG00000024663	58.8800424553428	1.94602829329186	2.47498430563307e-08	Rab3il1
ENSMUSG00000056054	752.229389831819	1.94128683265141	0.00894623202145359	S100a8
ENSMUSG00000028581	914.34945381686	1.93835629272469	1.86646651555838e-09	Laptm5
ENSMUSG00000030877	19.5289910220712	1.93148542914702	2.31141352056124e-05	Mfsd13b
ENSMUSG00000063531	88.5853250814511	1.93145139332029	1.12751420481751e-14	Sema3e
ENSMUSG00000075254	205.816867844452	1.92871287491332	2.90767727814692e-19	Heg1
ENSMUSG00000020681	166.187046898351	1.92490221816635	4.15472073847674e-09	Ace
ENSMUSG00000043004	92.5319111999381	1.92464494506826	9.70257969500732e-07	Gng2
ENSMUSG00000056427	239.389690611879	1.92225045095336	2.06886936911469e-14	Slit3
ENSMUSG00000001128	292.522089952393	1.91900785886721	1.73006765091512e-15	Cfp
ENSMUSG00000058914	8.34649833522337	1.91844588892738	0.00648741308611342	C1qtnf3
ENSMUSG00000028251	11.8462198086517	1.91797982320513	0.000396936079758779	Tstd3
ENSMUSG00000020218	42.9222923605676	1.91648419604201	0.00654520480684427	Wif1
ENSMUSG00000034271	254.196578885322	1.91331921397034	5.47443086452693e-10	Jdp2
ENSMUSG00000079652	18.7542455829049	1.91236895496493	0.000163534351729509	Fam71f2
ENSMUSG00000071203	41.3622042272812	1.91156527528824	8.51024672856052e-08	Naip5
ENSMUSG00000031070	79.3933248576277	1.90960189738172	1.34618424369085e-05	Mrgprf
ENSMUSG00000001020	52.8729136304746	1.90940997886807	1.0923183141818e-07	S100a4
ENSMUSG00000034738	12.4719020770536	1.90747186184823	0.00015384051423777	Nostrin
ENSMUSG00000015745	118.45386865747	1.90679900304062	2.46983811366963e-18	Plekho1
ENSMUSG00000024784	36.7046335627279	1.90462300002402	0.00122505149478214	Gpha2
ENSMUSG00000025746	200.791980790164	1.89921903821537	6.35947427168915e-06	Il6
ENSMUSG00000035697	500.285111802411	1.89861168689663	4.43590587134268e-10	Arhgap45
ENSMUSG00000037860	52.1884028158912	1.89258875358228	1.01691707765091e-08	Aim2
ENSMUSG00000089715	98.1269273390052	1.89216421493801	2.21669031064622e-12	Cbx6
ENSMUSG00000066607	13.4129641677382	1.89035472352446	0.000404548148914483	Insyn1
ENSMUSG00000050345	8.0435912460433	1.88863177341012	0.00833258314228241	4930486L24Rik
ENSMUSG00000020407	122.762183891974	1.88239761393918	4.79827374256175e-06	Upp1
ENSMUSG00000071714	417.096443408649	1.88076772700511	8.97785622674089e-10	Csf2rb2
ENSMUSG00000020143	163.083175197106	1.8705390836973	6.52708102398365e-07	Dock2
ENSMUSG00000047180	527.083858185588	1.86992532476716	2.13390438137627e-09	Neurl3
ENSMUSG00000034591	48.7599278084447	1.86948363241896	2.53757599429853e-08	Slc41a2
ENSMUSG00000022665	227.649613741824	1.86935203612838	9.26028657696872e-12	Ccdc80
ENSMUSG00000045826	48.5793288031831	1.86415968755012	0.000272575609688585	Ptprcap
ENSMUSG00000046157	21.2562471651969	1.86115346956059	1.67878176396557e-05	Tmem229b
ENSMUSG00000034845	133.949697696871	1.86049202176082	7.37378596164023e-07	Plvap
ENSMUSG00000026981	2131.67552825752	1.85752850611878	3.36939062918725e-09	Il1rn
ENSMUSG00000095213	33.4696949776287	1.8532845659092	0.000172879897132104	NA
ENSMUSG00000037921	64.457148165457	1.85251072639664	0.000720261947114925	Ddx60
ENSMUSG00000025422	95.9440199451366	1.84748707838912	3.16024009911695e-07	Agap2
ENSMUSG00000031661	23.6704508936294	1.84115865207638	0.00180315441287403	Nkd1
ENSMUSG00000090222	21.2533994099077	1.83729250494892	0.000616509832387868	NA
ENSMUSG00000049288	84.8261526324231	1.8367557901131	4.76443406515024e-11	Lix1l
ENSMUSG00000026832	597.725520800567	1.83494381551739	1.0912910213872e-13	Cytip
ENSMUSG00000026389	188.018514345627	1.83402562949702	2.6425661774427e-15	Steap3
ENSMUSG00000026288	302.36276435095	1.83129597264988	1.17122015997811e-08	Inpp5d
ENSMUSG00000027985	49.5378527541085	1.82999307785888	0.00108845688186972	Lef1
ENSMUSG00000038807	47.1371067550575	1.82879629035796	2.0411715400581e-08	Rap1gap2
ENSMUSG00000039236	245.500825773371	1.82826176419283	1.76156159071323e-06	Isg20
ENSMUSG00000032766	33.6384099222111	1.8270799761834	0.0013373717500423	Gng11
ENSMUSG00000027797	69.3603102879939	1.82616296515114	4.2552192000255e-06	Dclk1
ENSMUSG00000031101	37.0306068908137	1.82447612825844	3.36409291033154e-05	Sash3
ENSMUSG00000029070	94.6410161844648	1.82390218672122	8.13846909009091e-13	Mxra8
ENSMUSG00000021728	1127.9982251119	1.8219789908423	2.04585741581801e-15	Emb
ENSMUSG00000021759	152.370475085579	1.82074790592994	1.314666413275e-13	Plpp1
ENSMUSG00000037202	34.5990469659519	1.81773104343345	0.000612771157148364	Prf1
ENSMUSG00000033597	18.3658881668081	1.81732761981717	7.7972621451866e-05	Caskin1
ENSMUSG00000039005	59.9356538230461	1.81678904782402	1.33046133821908e-06	Tlr4
ENSMUSG00000022440	25.6651814683575	1.80834168978361	0.00247227522296383	C1qtnf6
ENSMUSG00000025161	977.349495000585	1.80660935592571	0.000150258294430224	Slc16a3
ENSMUSG00000042834	118.467290434546	1.80537200785868	1.91498904029618e-09	Nrep
ENSMUSG00000040181	25.9949383526067	1.80207306376144	0.000517162947444673	Fmo1
ENSMUSG00000050721	544.738854577665	1.80159429935137	5.90633663110593e-15	Plekho2
ENSMUSG00000035062	12.8196705838364	1.79987086951405	0.00649904828457917	Zc4h2
ENSMUSG00000036106	12.4349093076541	1.79970159779615	0.00664630928101359	Prr5
ENSMUSG00000028078	11.3963341621342	1.79588617221888	0.00461455003736428	Dclk2
ENSMUSG00000028597	20.4927470064966	1.79131694920489	6.53073987900418e-06	Gpx7
ENSMUSG00000022885	66.3294777057478	1.7907328898663	3.04840932093594e-06	St6gal1
ENSMUSG00000036469	33.8595657032062	1.7904901935981	0.000378006210417568	March1
ENSMUSG00000018507	132.795388530324	1.78998831625126	1.78464187488328e-08	Trpv2
ENSMUSG00000078942	31.3051301457007	1.77969010214653	9.72215703676523e-06	Naip6
ENSMUSG00000001249	10.1790086964209	1.77891803731357	0.00626120297082151	Hpn
ENSMUSG00000030786	190.266674035628	1.77675944010696	2.97224818926432e-08	Itgam
ENSMUSG00000037010	47.5838543041056	1.77546448987031	1.0929326014476e-05	Apln
ENSMUSG00000046223	1038.80955574323	1.7690754438332	3.19187132195643e-08	Plaur
ENSMUSG00000097767	19.9261403578259	1.76604649628824	6.70791951416522e-05	Miat
ENSMUSG00000029061	8.95390384568729	1.76565034302562	0.00591144808628386	Mmp23
ENSMUSG00000018340	331.950765514557	1.75801455982824	8.84377508125667e-10	Anxa6
ENSMUSG00000074766	304.162488829493	1.75292799786664	2.82294114123007e-09	Ism1
ENSMUSG00000029314	64.6239343475935	1.75153957313904	0.000518338918502481	Gpat3
ENSMUSG00000044258	289.41874334515	1.7511907319245	7.76822307051409e-08	Ctla2a
ENSMUSG00000031133	84.8873618608589	1.74929098345197	1.63458358845237e-07	Arhgef6
ENSMUSG00000036298	11.2337661563357	1.74664969830276	0.00930356746731675	Slc2a13
ENSMUSG00000019843	196.974377117371	1.74628663988656	1.10237808413503e-11	Fyn
ENSMUSG00000028445	22.8219753865612	1.74563411581591	0.0071007359218822	Enho
ENSMUSG00000037071	17256.2290015764	1.74409824021172	9.25423129755535e-17	Scd1
ENSMUSG00000015437	25.3135869175562	1.74145772072598	0.00582233536188457	Gzmb
ENSMUSG00000108658	12.6515208918375	1.73559714405095	0.009097337996479	NA
ENSMUSG00000052087	76.6716026473289	1.73472241533598	3.80011009165463e-09	Rgs14
ENSMUSG00000030789	199.831461751489	1.73411544184539	1.99676554454526e-05	Itgax
ENSMUSG00000022799	150.60429155954	1.73080736262569	1.57436225822211e-09	Arhgap31
ENSMUSG00000027078	162.505568303171	1.73074816738302	1.40349161317156e-07	Ube2l6
ENSMUSG00000060961	32.0552877764497	1.73055240642197	4.79257311680901e-07	Slc4a4
ENSMUSG00000021214	542.976343028031	1.73045209684368	0.000116405484969749	Akr1c18
ENSMUSG00000020627	29.6381074211798	1.7281778745439	0.000160808061432139	Klhl29
ENSMUSG00000038543	9.71693616395388	1.72480879085693	0.00623934136863734	BC028528
ENSMUSG00000016256	495.703470402487	1.72145188460329	7.14801772520927e-12	Ctsz
ENSMUSG00000046743	20.9030539202338	1.71984581311915	0.000401887453131918	Fat4
ENSMUSG00000037712	219.384458314435	1.71810035103852	3.29812835534366e-10	Fermt2
ENSMUSG00000030589	225.950179571017	1.7177392402502	5.02718347151227e-06	Rasgrp4
ENSMUSG00000102758	77.106818110317	1.71571521666628	6.16309963915475e-10	Naaladl2
ENSMUSG00000002688	10.2021640438216	1.7153605005206	0.00422741199540865	Prkd1
ENSMUSG00000027239	14.8426955936327	1.71531312009652	0.0020609372825301	Mdk
ENSMUSG00000029401	265.360249084081	1.71219505741656	1.1547746452047e-08	Rilpl2
ENSMUSG00000019846	261.695012231959	1.71200130346334	7.81618216883171e-12	Lama4
ENSMUSG00000026573	71.4384242740104	1.7070804210831	0.00426667843313134	Xcl1
ENSMUSG00000001156	2054.71996839404	1.70567359795064	1.03820184003187e-05	Mxd1
ENSMUSG00000037990	31.0965033870533	1.70515609013619	0.000201816928651908	Sh3rf3
ENSMUSG00000058571	21.3196887251898	1.70424435691598	0.00063917127350537	Gpc6
ENSMUSG00000041012	63.776691551361	1.70083998445562	1.72136508923092e-09	Cmtm8
ENSMUSG00000044033	20.8533836733281	1.69717424654444	0.00189201402849172	Ccdc141
ENSMUSG00000038508	58.9205036630057	1.68931574437673	0.00372809400307789	Gdf15
ENSMUSG00000005465	19.0500323948197	1.68629079547569	0.00410769281261188	Il27ra
ENSMUSG00000030246	489.402518472703	1.6860168462945	3.37228446401274e-14	Ldhb
ENSMUSG00000064109	15.9260800028106	1.68569090500208	0.00411709067586419	Hcst
ENSMUSG00000001604	52.2327794732874	1.68353361031549	0.000105172501982304	Tcea3
ENSMUSG00000030671	57.9525212882558	1.68261378002327	3.54327117377567e-07	Pde3b
ENSMUSG00000044122	18.9971643078143	1.67867278430643	0.000708906775489088	Proca1
ENSMUSG00000044906	33.5238526136597	1.67429002862662	1.49447308708703e-05	4930503L19Rik
ENSMUSG00000022894	172.075546136171	1.67036732885606	1.51584601980584e-13	Adamts5
ENSMUSG00000025375	25.6151127509951	1.66970000631508	0.00179027082232816	Aatk
ENSMUSG00000050022	73.8503445277572	1.6645158391224	2.19996341252772e-08	Amz1
ENSMUSG00000074874	63.7045698948069	1.66104142164534	0.00093749565926537	Ctla2b
ENSMUSG00000042284	25.7148452288638	1.66026059532954	4.40609316991049e-05	Itga1
ENSMUSG00000073002	19.8115539204052	1.65917597248737	0.00564978118322979	Vamp5
ENSMUSG00000070524	11.8540272981994	1.65710577155001	0.00353844669993373	Fcrlb
ENSMUSG00000031709	142.924486267872	1.65661887347086	8.98901575499285e-11	Tbc1d9
ENSMUSG00000067613	41.551016550406	1.65439600586692	0.00100633979035505	Krt83
ENSMUSG00000040808	17.2588968494176	1.65430524237785	0.000620831743889476	S100g
ENSMUSG00000024965	162.955628411986	1.65318107891128	5.61811330625601e-09	Fermt3
ENSMUSG00000079654	43.5205735951168	1.64524312994801	4.11260670766155e-06	Prrt4
ENSMUSG00000039943	52.9198781166497	1.64303302359426	3.24502128904441e-07	Plcb4
ENSMUSG00000076490	91.9767494659645	1.64066940823846	8.53924774392294e-07	NA
ENSMUSG00000070390	15.4758301983192	1.6397946316696	0.0059191692529444	Nlrp1b
ENSMUSG00000046312	27.41201016708	1.63926075938803	0.000721291886643949	Myorg
ENSMUSG00000045312	73.1098514953155	1.63520598102982	1.7432410491734e-05	Lhfpl2
ENSMUSG00000074813	36.949561440092	1.63164831002296	3.49924189593408e-05	NA
ENSMUSG00000018774	308.924480876872	1.63057400944044	2.61490470400397e-07	Cd68
ENSMUSG00000049313	636.798718117854	1.6298772192518	4.21868909949061e-09	Sorl1
ENSMUSG00000031220	96.0515098151359	1.62790833681498	1.58693937519059e-08	Awat2
ENSMUSG00000025911	13.5428309279991	1.62749245957147	0.00624937421569528	Adhfe1
ENSMUSG00000026357	32.1217349993051	1.62708753489631	0.00286020065910978	Rgs18
ENSMUSG00000023903	44.2699076277248	1.62687801837962	5.18191276595705e-05	Mmp25
ENSMUSG00000030711	22.8962860649755	1.62329004232587	0.00278081991209458	Sult1a1
ENSMUSG00000097418	21.1143278349173	1.62205569938547	0.00348919083627231	Mir155hg
ENSMUSG00000030737	99.5127395168477	1.62186822398673	1.49645631774111e-06	Slco2b1
ENSMUSG00000016758	7.88761248062304	1.62161475738762	0.00701968905555108	Bik
ENSMUSG00000013707	24.8733283295226	1.61806722869714	0.000726458556020142	Tnfaip8l2
ENSMUSG00000060206	48.892473677836	1.61800126840059	1.5082584903828e-05	Zfp462
ENSMUSG00000058966	179.681490545583	1.61619489921141	4.2403249104105e-09	Fam57b
ENSMUSG00000022901	174.042417089012	1.61524643885077	1.17086056753662e-06	Cd86
ENSMUSG00000000594	402.336329118497	1.6118916386675	1.75545410633634e-10	Gm2a
ENSMUSG00000039936	202.605849626338	1.61113101367512	0.000152207253277321	Pik3cd
ENSMUSG00000021806	39.8156947777742	1.60964689590125	0.0034072779443515	Nid2
ENSMUSG00000061414	13.4740680409809	1.60455372153358	0.00579965928769886	Cracr2a
ENSMUSG00000039126	28.1121208500765	1.60275295249033	1.8420333709834e-05	Prune2
ENSMUSG00000006310	15.6895960466282	1.60199524797025	0.00181371966047312	Zbtb32
ENSMUSG00000087445	10.8008184203592	1.60021912550066	0.0071268164291863	NA
ENSMUSG00000074342	49.8649414103315	1.59829780299989	0.000389835139213103	I830077J02Rik
ENSMUSG00000040723	125.409799350604	1.59791567088328	1.00244963437447e-05	Rcsd1
ENSMUSG00000045404	10.4053288776307	1.59726833286911	0.0078074413155837	Kcnk13
ENSMUSG00000028071	82.2622552284755	1.59704253828132	1.7827927503578e-06	Sh2d2a
ENSMUSG00000090248	22.1556553893705	1.59693806023006	0.00413986991569355	NA
ENSMUSG00000024299	142.708760430518	1.59336373463177	3.35480161384326e-07	Adamts10
ENSMUSG00000026475	233.342544448902	1.58942365457497	5.07626027187722e-08	Rgs16
ENSMUSG00000066113	149.646718475802	1.58822724446413	1.34618424369085e-05	Adamtsl1
ENSMUSG00000024013	47.4479066572445	1.58684831441885	0.000168456895092992	Fgd2
ENSMUSG00000030222	83.4241926226464	1.5862755026698	0.000136595801637061	Rerg
ENSMUSG00000032311	114.072260189627	1.58350251585099	3.00570367971434e-07	Nrg4
ENSMUSG00000020886	47.9027086431779	1.57923945338686	2.52164290429063e-05	Dlg4
ENSMUSG00000108024	12.8712396650777	1.57848441554251	0.00350661207725787	NA
ENSMUSG00000049191	13.2251411943537	1.57462250970798	0.00178058482978603	Rtl5
ENSMUSG00000032946	35.6244879196873	1.57091980505822	0.000711443485045303	Rasgrp2
ENSMUSG00000041423	17.0192498291621	1.56783116724499	0.00376566285305066	Paqr6
ENSMUSG00000046095	43.6426789385417	1.56536062056962	9.58736468570915e-05	Krt32
ENSMUSG00000025555	179.081222793129	1.56498938639345	5.64162504267133e-09	Farp1
ENSMUSG00000035413	46.7182096480036	1.56478835685893	0.000714503132117113	Tmem98
ENSMUSG00000030834	67.2615617774229	1.56216777538466	0.000600833964969654	Abcc6
ENSMUSG00000041515	74.9173852727586	1.55983701243505	1.82685579558104e-07	Irf8
ENSMUSG00000040699	95.3214891087243	1.55953030944119	3.88129530420167e-07	Limd2
ENSMUSG00000079017	225.606934563199	1.55408487405968	1.36725503474151e-07	Ifi27l2a
ENSMUSG00000026656	242.851840227436	1.55329261932629	2.44661496371628e-06	Fcgr2b
ENSMUSG00000004508	300.76864822657	1.55013525973356	1.29883431206623e-08	Gab2
ENSMUSG00000024621	872.796085380664	1.54933969795922	4.16224987547923e-06	Csf1r
ENSMUSG00000029338	928.758116452234	1.54625479751263	3.2325645614265e-06	Antxr2
ENSMUSG00000032094	41.9924454430074	1.54314659800979	0.00105394377549078	Cd3d
ENSMUSG00000001021	55.6108088023041	1.54063629677994	0.000651935713812603	S100a3
ENSMUSG00000002111	345.708846767206	1.54005718745831	7.89242743795457e-09	Spi1
ENSMUSG00000028931	61.6743447994645	1.53566029332373	3.39571300033719e-07	Kcnab2
ENSMUSG00000051359	62.3601841099765	1.5326300761167	0.000586856220972472	Ncald
ENSMUSG00000014361	88.7658975861583	1.53071640869734	0.000872641265057214	Mertk
ENSMUSG00000027368	433.58568179996	1.52895679163683	1.31701038465944e-09	Dusp2
ENSMUSG00000027698	149.38381557881	1.51941947088747	1.11607151482792e-05	Nceh1
ENSMUSG00000020553	30.8840015669104	1.51700235688728	2.9159954535091e-05	Pctp
ENSMUSG00000038860	27.8688672894559	1.51686288407731	0.00018297711348483	Garnl3
ENSMUSG00000027843	104.318756942485	1.51509670596651	5.80227010126861e-06	Ptpn22
ENSMUSG00000046561	20.0660668719948	1.51169271258236	0.00261769313413289	Arsj
ENSMUSG00000051457	82.2967770198592	1.50931626104395	0.000414924197850452	Spn
ENSMUSG00000015452	43.8407325557597	1.50888921372014	0.000893390279518792	Ager
ENSMUSG00000020598	80.9188119612434	1.50678444835719	0.00689857824516042	Nrcam
ENSMUSG00000030272	105.945640439266	1.50609810605135	3.63488683495362e-06	Camk1
ENSMUSG00000033581	35.6621147683489	1.50600406608721	0.000394731353661189	Igf2bp2
ENSMUSG00000091387	41.170250971257	1.50555324004768	0.000988678773311069	Gcnt4
ENSMUSG00000039997	190.585358263873	1.50533990471892	1.0923183141818e-07	Ifi203
ENSMUSG00000051735	85.9524543421845	1.50405339545944	3.24710476585891e-06	Rinl
ENSMUSG00000021253	174.660075490479	1.50138154062829	1.3034677299435e-05	Tgfb3
ENSMUSG00000032060	66.8572593329193	1.49644300260515	1.05828242638121e-05	Cryab
ENSMUSG00000074207	723.825491663079	1.49566134939447	1.1971973761829e-10	Adh1
ENSMUSG00000033427	39.1196490054632	1.49507435911327	0.00353844669993373	Upb1
ENSMUSG00000038349	18.2334735907319	1.49464157552461	0.00648228942343816	Plcl1
ENSMUSG00000041734	146.467964995716	1.49449984677135	1.74897042684317e-12	Kirrel
ENSMUSG00000002033	203.722092193033	1.49341839888617	0.000515341994708131	Cd3g
ENSMUSG00000024087	147.128380492465	1.49306524920617	3.41197605265106e-06	Cyp1b1
ENSMUSG00000005413	954.004925031721	1.49187262326204	2.54631371130792e-07	Hmox1
ENSMUSG00000020788	180.972012846618	1.49170491301135	5.15740876304191e-05	Atp2a3
ENSMUSG00000025359	58.7472965930623	1.49099135986925	3.50211874949308e-06	Pmel
ENSMUSG00000026764	20.3005902689909	1.48684117519239	0.00373854954229339	Kif5c
ENSMUSG00000036887	135.373013205126	1.48567389427133	4.79827374256175e-06	C1qa
ENSMUSG00000004612	80.4005479682563	1.48152720269648	0.00313976988588601	Nkg7
ENSMUSG00000047592	54.2407548857559	1.48046377162343	0.00016956952430009	Nxpe5
ENSMUSG00000029798	73.7409833117056	1.47898899691894	0.000699619331649576	Herc6
ENSMUSG00000052302	15.5980319246016	1.47666719996982	0.00562676891708142	Tbc1d30
ENSMUSG00000024381	146.49427717336	1.47641295281291	3.68239260779025e-07	Bin1
ENSMUSG00000017897	59.455141749205	1.47593925708428	0.00300981030022914	Eya2
ENSMUSG00000020614	56.6534113751088	1.47543282858708	0.000694962065567337	Fam20a
ENSMUSG00000020467	779.086979493098	1.47320377554361	4.0096190868587e-19	Efemp1
ENSMUSG00000047181	47.7199140071148	1.47267030742981	4.34497666816976e-05	Samd14
ENSMUSG00000019194	143.107459541271	1.47201965120178	1.43008254024845e-09	Scn1b
ENSMUSG00000041737	98.4345018299192	1.46855308983149	6.76970689446439e-06	Tmem45b
ENSMUSG00000035513	145.858129476209	1.46604256244248	3.44485140750785e-06	Ntng2
ENSMUSG00000059326	678.073418835471	1.46583956686649	2.78299322166014e-09	Csf2ra
ENSMUSG00000021798	37.0236029842045	1.45838094368123	2.20212448443972e-05	Ldb3
ENSMUSG00000068129	39.6528844695011	1.45819238543686	0.00205242559747059	Cst7
ENSMUSG00000052105	18.2409439371693	1.45491501630732	0.00793816014220857	Mtcl1
ENSMUSG00000048388	18.6008471423426	1.45294761488307	0.00581368427167026	Fam171b
ENSMUSG00000066705	187.527825048966	1.44944023959622	6.82561992167405e-06	Fxyd6
ENSMUSG00000020437	342.495773818705	1.44685304127807	3.50934696467258e-06	Myo1g
ENSMUSG00000005763	94.7392799312216	1.44594056394939	0.00021056104913825	Cd247
ENSMUSG00000050989	787.353890129357	1.44494793618978	2.08263527010179e-09	Selenon
ENSMUSG00000060969	349.486708362442	1.44375833333713	1.64897606499856e-07	Irx1
ENSMUSG00000024459	55.5492028623856	1.44189774257401	0.00671621657172747	H2-M5
ENSMUSG00000006777	99.6747630114093	1.44188000243704	0.00201262502340495	Krt23
ENSMUSG00000004933	76.8394307400488	1.44083872727123	4.38009217761638e-05	Matk
ENSMUSG00000070044	33.8620403846339	1.43508809445416	9.01278420405177e-05	Fam149a
ENSMUSG00000081169	15.2533549646259	1.4346372266175	0.0047457449784852	NA
ENSMUSG00000020811	18.9914001567748	1.43392742636889	0.00536325637224448	Wscd1
ENSMUSG00000034353	23.8789940052609	1.43105072807765	0.00323829981559186	Ramp1
ENSMUSG00000031304	132.55133211341	1.43086776154065	3.98660756679947e-06	Il2rg
ENSMUSG00000042638	36.3482363973765	1.42858170731575	9.28800864695217e-05	Gucy2c
ENSMUSG00000022415	50.3001933660998	1.42732979013156	0.00110810409884685	Syngr1
ENSMUSG00000019699	62.1847986190845	1.42434201377515	0.000215692426533437	Akt3
ENSMUSG00000040247	43.9910603595618	1.42417692709743	9.98889912060043e-05	Tbc1d10c
ENSMUSG00000025934	89.6993030633011	1.42416705135974	3.26808671292527e-07	Gsta3
ENSMUSG00000025701	281.083696148836	1.42245318840631	5.47680546836642e-05	Alox5
ENSMUSG00000020186	58.1456883069451	1.41925766958282	4.07677454781904e-09	Csrp2
ENSMUSG00000022636	545.174746921284	1.41500972794569	2.37472854506962e-09	Alcam
ENSMUSG00000039153	87.2478035875324	1.41465822815561	2.49873443259217e-06	Runx2
ENSMUSG00000044162	32.296731987012	1.41250402681693	0.000571090244552413	Tnip3
ENSMUSG00000048200	488.049753268069	1.41218059093509	1.74182682251092e-08	Cracr2b
ENSMUSG00000064246	224.728618964608	1.41127141872502	4.03039081748719e-06	Chil1
ENSMUSG00000049804	35.213091771385	1.41097256913269	7.67544674788491e-05	Armcx4
ENSMUSG00000021720	26.4414356152835	1.40996392347485	0.00104427336240188	Rnf180
ENSMUSG00000039607	110.947500884031	1.40962214857871	1.03141309781735e-08	Rbms3
ENSMUSG00000024238	183.769568063781	1.40930769611074	2.93524466502765e-07	Zeb1
ENSMUSG00000050708	4865.46520818574	1.40898440396556	4.08679811733162e-14	Ftl1
ENSMUSG00000034463	147.270766391446	1.40667466700085	1.89619781692024e-08	Scara3
ENSMUSG00000019261	92.0041746488426	1.40620353055582	9.75688355558378e-08	Map1s
ENSMUSG00000038178	290.938899064737	1.4056244823326	4.99739872244765e-10	Slc43a2
ENSMUSG00000036218	33.4347175855657	1.40419700432335	0.00186395381611452	Pdzrn4
ENSMUSG00000026672	126.387774270015	1.40072263532778	1.67222869225702e-05	Optn
ENSMUSG00000061740	37.626160140721	1.39914551031808	0.000409337265632327	Cyp2d22
ENSMUSG00000000791	23.6827298421728	1.39865191683823	0.00632360083409789	Il12rb1
ENSMUSG00000028538	29.0009132180084	1.39799538311814	5.41401806849664e-05	St3gal3
ENSMUSG00000023411	157.455887740708	1.39731468827778	2.01799408006701e-08	Nfatc4
ENSMUSG00000078507	171.228052854981	1.39719217330168	3.27530159415024e-06	Aadacl3
ENSMUSG00000036452	124.546626602526	1.39569032327017	6.70644819422174e-07	Arhgap26
ENSMUSG00000003228	103.67681010475	1.39209610745726	8.68515202223803e-08	Grk5
ENSMUSG00000005583	115.953061528567	1.39139558378696	1.64897606499856e-07	Mef2c
ENSMUSG00000108545	13.1995785658106	1.38764933280006	0.0083631394489417	NA
ENSMUSG00000021565	159.442844830409	1.38449555519057	0.00389206515443813	Slc6a19
ENSMUSG00000028047	388.616214007897	1.38268363849844	1.44740717290303e-09	Thbs3
ENSMUSG00000020176	82.5235530893815	1.38164363589237	3.27530159415024e-06	Grb10
ENSMUSG00000027381	690.618166041908	1.38066337147212	3.39571300033719e-07	Bcl2l11
ENSMUSG00000004562	215.909573984068	1.38030616037295	1.13852531780565e-06	Arhgef40
ENSMUSG00000034586	34.3557741550028	1.37997938495026	3.72947783042947e-05	Hid1
ENSMUSG00000010663	101.566106343864	1.37706224925895	3.53771165629523e-05	Fads1
ENSMUSG00000053158	308.990944028402	1.37661575348275	1.11034290318661e-09	Fes
ENSMUSG00000070691	228.939021829315	1.36947828690702	1.20954783900901e-06	Runx3
ENSMUSG00000051727	24.8664752265548	1.36803483742659	0.00538503381643641	Kctd14
ENSMUSG00000004709	107.930673665494	1.36712771746587	8.15124519392921e-06	Cd244a
ENSMUSG00000030165	43.7367957633657	1.36688821405546	0.00571640142084045	Klrd1
ENSMUSG00000057137	71.6157393298903	1.36652174072248	3.45931293747262e-09	Tmem140
ENSMUSG00000042099	157.909088120895	1.36523309900656	4.28369435954553e-08	Kank3
ENSMUSG00000025163	180.767795403677	1.36510100397209	0.000423692143139669	Cd7
ENSMUSG00000034613	68.8612807927853	1.36326555991605	2.84234960749275e-06	Ppm1h
ENSMUSG00000026893	16.3716306874749	1.36175091808171	0.00957274412966192	Gca
ENSMUSG00000042918	46.0505540274061	1.36085171496796	0.000864843962831116	Mamstr
ENSMUSG00000053101	127.347698867665	1.35846464657946	0.00274731551422994	Gpr141
ENSMUSG00000032908	65.4347945365271	1.3538917813327	6.6464664023195e-05	Sgpp2
ENSMUSG00000023249	214.735137812566	1.35366365496265	3.73903923189958e-08	Parp3
ENSMUSG00000047473	31.5222412971831	1.35344709300718	0.000727911411987443	Zfp30
ENSMUSG00000015702	146.479712317971	1.3511912200574	0.00506685388995015	Anxa9
ENSMUSG00000033107	48.2938565481021	1.34966967152846	0.000574511230194529	Rnf125
ENSMUSG00000050106	29.0070914638555	1.34495519585732	0.000380554500426695	Tmc8
ENSMUSG00000076928	26.1932053182648	1.34380479933248	0.00463781975139299	NA
ENSMUSG00000050075	48.6319527189421	1.3436040363945	0.00028863629082855	Gpr171
ENSMUSG00000006362	56.1286483150425	1.34070747906488	0.00685978297424969	Cbfa2t3
ENSMUSG00000015396	702.56484926248	1.33795449042302	5.90267003175116e-08	Cd83
ENSMUSG00000041112	143.157517737044	1.33582345589804	2.71556318385377e-06	Elmo1
ENSMUSG00000052142	70.3020413372991	1.33296024789347	0.00130940753441039	Rasal3
ENSMUSG00000032420	560.72947266422	1.33077515684872	8.17388104786919e-07	Nt5e
ENSMUSG00000038179	55.5036689428746	1.3302549111261	0.000135498859718904	Slamf7
ENSMUSG00000025232	225.660617236616	1.32618261390567	4.84658082627311e-11	Hexa
ENSMUSG00000048537	1081.96897491106	1.32599398979285	8.46482158413429e-09	Phldb1
ENSMUSG00000026548	19.075996537075	1.32322724254964	0.000620831743889476	Slamf9
ENSMUSG00000034394	97.9542688117283	1.32301122559388	4.53695803521754e-06	Lif
ENSMUSG00000053054	69.1957799174126	1.32285404377387	0.00456013409333979	Adh6a
ENSMUSG00000104876	387.218396083209	1.32257972772759	0.000543562161591647	NA
ENSMUSG00000000402	52.396185384697	1.31886482133704	4.3501955577992e-05	Egfl6
ENSMUSG00000019978	660.783851183639	1.31875500195382	3.26995166968337e-14	Epb41l2
ENSMUSG00000052135	153.488060047276	1.31839189452278	2.36284004727766e-07	Foxo6
ENSMUSG00000020901	289.054621707228	1.31630632999347	8.48964366271967e-05	Pik3r5
ENSMUSG00000043614	32.3968857469682	1.31475424223937	0.0025538675946986	Vps37d
ENSMUSG00000046207	52.1142216614632	1.31237196463331	1.32202374096229e-07	Pik3r6
ENSMUSG00000021280	16.6148263536122	1.31044923661809	0.000885106869266741	Exoc3l4
ENSMUSG00000019876	79.7554865102195	1.30982342953748	6.93053214861879e-06	Pkib
ENSMUSG00000031659	256.044285765977	1.30821470250963	0.000289212475226019	Adcy7
ENSMUSG00000024778	229.792738363356	1.30547888567079	7.73136948710801e-05	Fas
ENSMUSG00000044456	292.374033985959	1.29963185332785	4.43558677693811e-06	Rin3
ENSMUSG00000029380	2794.26108442349	1.29787494051036	1.72389160315733e-08	Cxcl1
ENSMUSG00000040987	28.3316674934382	1.29684948776014	0.000957934168736715	Mill2
ENSMUSG00000036908	428.215711742674	1.29548117063788	4.76443406515024e-11	Unc93b1
ENSMUSG00000039217	68.1004861612241	1.29120087560053	5.07820114805009e-05	Il18
ENSMUSG00000036553	96.1916246052143	1.28694066801344	1.41428077408781e-09	Sh3tc1
ENSMUSG00000018654	201.280113686392	1.28575466289686	7.69194262770171e-05	Ikzf1
ENSMUSG00000020399	175.517715164494	1.28398237444813	1.3034677299435e-05	Havcr2
ENSMUSG00000034783	1105.65206221756	1.28362752166326	0.00402175019475765	Cd207
ENSMUSG00000057969	19.7539766566363	1.28060987598074	0.00372037356989766	Sema3b
ENSMUSG00000031530	213.187403072327	1.2800139818017	1.5111682565845e-09	Dusp4
ENSMUSG00000031636	30.9984204118678	1.27882910044476	0.00222130065759425	Pdlim3
ENSMUSG00000024910	126.911917386331	1.27749494199183	0.00444071567949561	Ctsw
ENSMUSG00000060586	3415.69519520491	1.27570326887943	0.00188779340658622	H2-Eb1
ENSMUSG00000030123	308.185898978468	1.27324904597825	6.87633432766729e-09	Plxnd1
ENSMUSG00000049608	26.125122110899	1.27317778618389	0.00308103681960871	Gpr55
ENSMUSG00000028845	49.90980207024	1.27269143415769	0.000637994642233263	Tekt2
ENSMUSG00000030107	118.258622280834	1.26994311088861	0.00619389778053239	Usp18
ENSMUSG00000098557	1907.38164638523	1.26723871420189	5.58118019731208e-06	Kctd12
ENSMUSG00000038884	30.3278565625914	1.26122743887765	0.00715906557624857	Shfl
ENSMUSG00000032232	281.551689090822	1.26029137952542	0.000298014438102397	Cgnl1
ENSMUSG00000022015	43.6357784845613	1.2584543616928	0.00587496251439976	Tnfsf11
ENSMUSG00000078794	38.3103209355363	1.25532398777033	0.000126046222708471	Dact3
ENSMUSG00000022661	333.666119405902	1.25379077196879	4.42109289557699e-05	Cd200
ENSMUSG00000049872	37.2176141378863	1.25263180707528	0.000129579757956831	Calhm5
ENSMUSG00000015709	80.4600062227698	1.25257458993667	0.00089460965567282	Arnt2
ENSMUSG00000047907	123.544472217506	1.25198011847793	5.35840299379392e-06	Tshz2
ENSMUSG00000033276	21.0023523684578	1.24971739406586	0.00277897327261071	Stk36
ENSMUSG00000039646	456.638480580502	1.24925348824691	2.60779298865206e-08	Vasn
ENSMUSG00000086564	42.462754458626	1.24885569722882	0.00168781970088944	Cd101
ENSMUSG00000030263	180.761604037995	1.24806221723571	0.000818437996608834	Lrmp
ENSMUSG00000044562	366.332094246838	1.24628378166208	1.20296464181228e-07	Rasip1
ENSMUSG00000038843	138.166712959069	1.24618616088683	0.00185057174852685	Gcnt1
ENSMUSG00000001119	1814.97824067795	1.24581332790576	2.85763333754652e-13	Col6a1
ENSMUSG00000073421	3939.13138333473	1.24408368379291	0.00294085839952244	H2-Ab1
ENSMUSG00000030257	36.2150896643343	1.24396038524692	1.34618424369085e-05	Srgap3
ENSMUSG00000083664	30.3649635743562	1.23921456150651	0.00878012568885904	NA
ENSMUSG00000027858	74.6715509824172	1.23767144920016	0.00364895328036707	Tspan2
ENSMUSG00000054342	63.3401033015507	1.23580823272891	0.000645738306409626	Kcnn4
ENSMUSG00000074785	89.3848772610058	1.23441555490248	0.00195460934250683	Plxnc1
ENSMUSG00000040722	30.5181066683677	1.23158988330153	0.00285443982802806	Scamp5
ENSMUSG00000001555	174.248788137966	1.22889842302472	9.94472421207071e-09	Fkbp10
ENSMUSG00000025255	25.3224372215837	1.2285876010764	0.00244904834338395	Zfhx4
ENSMUSG00000051851	32.5580892595115	1.22845182726807	0.000549692779514156	Rtl8c
ENSMUSG00000020101	490.152691992546	1.22553673794668	3.64266254142755e-10	Vsir
ENSMUSG00000040329	82.9676176286924	1.22474310776273	0.00334704010855487	Il7
ENSMUSG00000057058	34.0496719118051	1.22321989191165	0.00339173836772418	Skap1
ENSMUSG00000028600	131.136359738047	1.22255869971696	1.09761237666692e-06	Podn
ENSMUSG00000001588	255.829957341832	1.22024964636046	0.000103793829565224	Acap1
ENSMUSG00000024610	8457.90310344534	1.21932396071767	8.52770251316831e-05	Cd74
ENSMUSG00000026117	88.8326500080588	1.21847979477277	0.00155983286624594	Zap70
ENSMUSG00000054672	54.1720078538533	1.2154053062374	0.000928022052496409	5830411N06Rik
ENSMUSG00000079547	237.701015944063	1.21450441816358	1.58857594764232e-06	H2-DMb1
ENSMUSG00000042404	204.839569534764	1.21233431659284	5.93100823582583e-08	Dennd4b
ENSMUSG00000037649	321.824123610281	1.21222529323858	2.75656462905459e-06	H2-DMa
ENSMUSG00000031378	93.464513961791	1.21149203638367	1.52879202475786e-07	Abcd1
ENSMUSG00000041481	93.016338151715	1.21115784239698	0.00445904866548731	Serpina3g
ENSMUSG00000037548	94.1064081887682	1.20926072497333	0.00318561511802503	H2-DMb2
ENSMUSG00000059336	57.2521448186705	1.2083970712385	0.000642308587057857	Slc14a1
ENSMUSG00000036036	24.0197796540829	1.20720996412152	0.00286020065910978	Zfp57
ENSMUSG00000062542	29.3513017178459	1.20713493392599	0.00433735694217322	Syt9
ENSMUSG00000009614	157.438220364984	1.20463389604258	3.57496480624953e-05	Sardh
ENSMUSG00000026102	81.6749221894602	1.20450799722493	1.13305157703276e-06	Inpp1
ENSMUSG00000041729	31.9757648642025	1.20279589825089	0.00067378898949786	Coro2b
ENSMUSG00000050520	76.3749913660743	1.20264173347419	0.00092424796524149	Cldn8
ENSMUSG00000026546	32.6148682872002	1.20215859469916	0.00515951026900491	Cfap45
ENSMUSG00000020253	183.93912566614	1.1987985212905	2.65434789429144e-08	Ppm1m
ENSMUSG00000060675	210.515684711269	1.19872340795648	4.08657802445743e-05	Plaat3
ENSMUSG00000020377	78.8606643994394	1.19748521393349	0.000496898825491586	Ltc4s
ENSMUSG00000026358	2094.39114590296	1.19732514405919	4.33385960137758e-05	Rgs1
ENSMUSG00000048764	36.9197275984551	1.195084730495	0.00487643649102623	Tmprss11f
ENSMUSG00000015850	313.817342854464	1.19458699116673	7.77175993003895e-07	Adamtsl4
ENSMUSG00000020573	57.912658465234	1.19424137559963	0.000272036272398444	Pik3cg
ENSMUSG00000043421	301.226232035741	1.19058506949223	2.70355613669631e-11	Hilpda
ENSMUSG00000021508	2680.78668355789	1.18753389546954	0.00342829019069869	Cxcl14
ENSMUSG00000028459	171.257008445483	1.18746070197909	0.000579646572084556	Cd72
ENSMUSG00000030742	84.3936195511571	1.18418897058515	0.0021432643591165	Lat
ENSMUSG00000026797	108.436741424169	1.18288063907759	5.3544642722695e-09	Stxbp1
ENSMUSG00000041957	41.0316192278311	1.1813852493758	0.00265073933198947	Pkp2
ENSMUSG00000045672	153.227529114275	1.18086713408079	0.00360075657473162	Col27a1
ENSMUSG00000036594	3516.19081785707	1.18055218381714	0.00030714613392131	H2-Aa
ENSMUSG00000017652	71.3509594032563	1.17804063811744	0.00204457518660574	Cd40
ENSMUSG00000026170	218.545033278934	1.17487426774059	8.05228902997174e-06	Cyp27a1
ENSMUSG00000038608	217.943056593638	1.17202169424102	0.00122446245950952	Dock10
ENSMUSG00000030796	52.9697303219329	1.17087590648107	0.000242437253336057	Tead2
ENSMUSG00000024401	669.824887314397	1.17022993995445	9.70233110936563e-05	Tnf
ENSMUSG00000038264	88.7844113878072	1.16718671210818	0.000893390279518792	Sema7a
ENSMUSG00000078816	42.0254153485883	1.16697055548895	0.00493130574705277	Prkcg
ENSMUSG00000018381	87.5566608987651	1.16580770123629	1.43506738011938e-05	Abi3
ENSMUSG00000037944	153.51274346391	1.16482769357963	0.00503578072312489	Ccr7
ENSMUSG00000038576	69.4985177729436	1.16403126989635	8.32080013169212e-05	Susd4
ENSMUSG00000046807	67.907617525882	1.16392755339965	0.00747221854984936	Lrrc75b
ENSMUSG00000024063	351.419235548499	1.16238904058982	6.0794207564657e-05	Lbh
ENSMUSG00000109946	26.8431003454389	1.16031843099194	0.0018748704005026	Brd3os
ENSMUSG00000034614	211.062983803543	1.15753372696792	2.87347382156283e-05	Pik3ip1
ENSMUSG00000057315	533.567556345179	1.15729005714892	0.000177318086387027	Arhgap24
ENSMUSG00000023169	211.285031032302	1.15675150295962	7.68605029937946e-05	Slc38a1
ENSMUSG00000006782	68.2511614344211	1.1566611839974	2.34397112875656e-07	Cnp
ENSMUSG00000029570	696.155153326224	1.15614163563582	1.34963129775845e-08	Lfng
ENSMUSG00000040061	82.2032278538917	1.15539704225594	0.000293121890221429	Plcb2
ENSMUSG00000048826	35.6222206854498	1.1528584862355	0.00348919083627231	Dact2
ENSMUSG00000003882	232.213997112266	1.15072703175632	8.20064384928982e-05	Il7r
ENSMUSG00000042104	39.7647128073147	1.14965766892872	0.00280970692937865	Uggt2
ENSMUSG00000078350	69.698721775875	1.1466270809606	0.000524388010569699	Smim1
ENSMUSG00000068758	105.7839684732	1.14658518832547	3.54589175998388e-05	Il3ra
ENSMUSG00000022836	63.9997427073821	1.14342853465255	0.00105331773145057	Mylk
ENSMUSG00000022048	86.0363949788558	1.14327775607828	0.00144992036824774	Dpysl2
ENSMUSG00000041695	196.5819646879	1.14041072974675	1.93697349271536e-05	Kcnj2
ENSMUSG00000040710	85.5288089345349	1.13844191965798	0.00125043427165366	St8sia4
ENSMUSG00000036611	89.7059930891614	1.13553843168607	1.44723894687122e-05	Eepd1
ENSMUSG00000050212	102.178101918444	1.13380854396288	5.71220843613305e-06	Eva1b
ENSMUSG00000026853	585.705416420359	1.13292764860047	6.95833173171453e-12	Crat
ENSMUSG00000045629	82.9942629850619	1.13079368348618	0.00108440784644757	Sh3tc2
ENSMUSG00000040751	128.907290856486	1.12879962396103	3.0657195558408e-05	Lat2
ENSMUSG00000036862	39.6721760520015	1.12808839419625	0.00012443304764079	Dchs1
ENSMUSG00000030149	109.720858162175	1.1272064186095	0.00693846454928146	Klrk1
ENSMUSG00000061577	41.3517163555708	1.12599830848123	0.00632145862494651	Adgrg5
ENSMUSG00000097415	70.1188567666444	1.12378323916593	0.00745765602504032	NA
ENSMUSG00000010307	96.944639451183	1.12195912805682	5.1865247303082e-06	Tmem86a
ENSMUSG00000031387	93.5997038356749	1.11787668658504	7.02828678405862e-07	Renbp
ENSMUSG00000027452	78.0708497599079	1.11744836535496	0.000160949026692976	Acss1
ENSMUSG00000067924	115.319889480855	1.11719077317689	5.71220843613305e-06	Rtl8b
ENSMUSG00000002732	46.7872269778617	1.11693559690095	0.000387251263394389	Fkbp7
ENSMUSG00000030306	92.857240573534	1.1152608770641	0.00367004398909489	Tmtc1
ENSMUSG00000105107	36.0335687304887	1.11175587687452	0.00620961923212007	NA
ENSMUSG00000036931	911.909489918719	1.1098871431591	2.41071911797719e-05	Nfkbid
ENSMUSG00000036585	102.323712695526	1.10978204457693	0.000688144663106225	Fgf1
ENSMUSG00000014813	80.1505074593802	1.1069398372561	0.00447893517725544	Stc1
ENSMUSG00000040111	132.063773780656	1.10449412296155	0.000615093834930515	Gramd1b
ENSMUSG00000031504	313.539930626159	1.10274685771464	4.99397177372319e-06	Rab20
ENSMUSG00000079057	46.2594327861103	1.10099247377125	0.000445312848275456	Cyp4v3
ENSMUSG00000030156	107.688049491258	1.09488024182788	0.00143542588377914	Cd69
ENSMUSG00000064267	96.9747987881755	1.08957897009647	0.000882853408973769	Hvcn1
ENSMUSG00000066361	60.5606465023967	1.08842128724626	0.0059124986831505	Serpina3c
ENSMUSG00000038074	25.5010216265542	1.08382729117906	0.00169528728667225	Fkbp14
ENSMUSG00000038217	249.698385663454	1.08355736484778	1.28770216062134e-08	Tlcd2
ENSMUSG00000022969	270.383364941619	1.07947237540649	5.88751017483773e-10	Il10rb
ENSMUSG00000020027	137.600589435037	1.07929770676287	2.84427631906199e-05	Socs2
ENSMUSG00000034171	868.769341110907	1.07899506710741	3.46277948754538e-05	Faah
ENSMUSG00000021676	111.674957094051	1.07542193159384	0.000167131883547235	Iqgap2
ENSMUSG00000031538	271.666143857179	1.07264006268752	1.8176186097033e-06	Plat
ENSMUSG00000032177	56.5322921810528	1.07215685374272	0.00160021995262812	Pde4a
ENSMUSG00000021259	51.0886515094768	1.07198752698138	0.0068238679820624	Cyp46a1
ENSMUSG00000016206	51.106370950382	1.07007541365977	0.000199532390779224	H2-M3
ENSMUSG00000035735	51.0736201411641	1.06925422044675	0.000124683567296233	Dagla
ENSMUSG00000039158	237.795061649178	1.06921311068554	0.000185697203373724	Akna
ENSMUSG00000060802	4661.46282438222	1.06860302241205	1.05399848837264e-07	B2m
ENSMUSG00000026126	42.2701094005567	1.06730160656029	0.00251246980851591	Ptpn18
ENSMUSG00000050295	689.375896703035	1.06704278389778	1.08342685826507e-05	Foxc1
ENSMUSG00000026928	167.429103549347	1.06533664040451	0.000949059284299935	Card9
ENSMUSG00000030218	278.29281011902	1.06492419959114	5.70745570868837e-05	Mgp
ENSMUSG00000056476	29.6023622763195	1.06392408954583	0.00333006824920214	Med12l
ENSMUSG00000033066	1218.29098967441	1.06241676807016	4.69859171809904e-07	Gas7
ENSMUSG00000031712	136.763571087613	1.06213941730034	0.000366400621700102	Il15
ENSMUSG00000060227	64.6108148445368	1.06093613749522	2.69023978278277e-05	Casc4
ENSMUSG00000058297	214.778935479515	1.05803284498015	0.000386125662680817	Spock2
ENSMUSG00000020846	350.068333722024	1.05530397361868	0.000189963216040728	Rflnb
ENSMUSG00000037031	40.2475080097516	1.05297939622706	0.0050098904721782	Tspan15
ENSMUSG00000098112	145.606887010093	1.05210648306465	7.7963343819634e-05	Bin2
ENSMUSG00000046718	253.964454586288	1.05127742104302	0.00110281703263523	Bst2
ENSMUSG00000030255	42.2557287613383	1.05008934224997	0.00117829306969993	Sspn
ENSMUSG00000035273	62.6934986123056	1.04938934200972	0.00106707978883508	Hpse
ENSMUSG00000019823	645.725541569762	1.04925842236709	2.19330696774985e-09	Mical1
ENSMUSG00000019647	135.206200555714	1.04829224993086	0.000234647795409312	Sema6a
ENSMUSG00000035357	367.704517428155	1.04753882796255	0.00155894021925937	Pdzrn3
ENSMUSG00000072949	652.849485785199	1.04333703533999	2.07492632956634e-10	Acot1
ENSMUSG00000022575	144.191991758869	1.04153843675707	8.43916700034359e-05	Gsdmd
ENSMUSG00000071064	83.9549631067377	1.03634394502253	0.00885191287994443	Zfp827
ENSMUSG00000024043	45.1109315579877	1.0331736995472	0.00694557136752316	Arhgap28
ENSMUSG00000068923	35.8205492330786	1.03170488938755	0.00509366464124313	Syt11
ENSMUSG00000031480	112.049417160078	1.02676066653397	0.000523743537842368	Thsd1
ENSMUSG00000035678	233.62025202835	1.02555026029084	5.48750825365586e-05	Tnfsf9
ENSMUSG00000092060	94.7326972892064	1.01773713862755	0.00350930869108881	Bend4
ENSMUSG00000066842	140.539981595776	1.01771294427932	0.00720873853831708	Hmcn1
ENSMUSG00000071604	720.866742553845	1.01697773142701	3.06005172206154e-07	Fam189a2
ENSMUSG00000057335	165.157102975374	1.01559776290837	3.20554441221417e-05	Cep170
ENSMUSG00000064373	1357.30539676258	1.01263030602564	5.81248581984682e-05	Selenop
ENSMUSG00000034855	525.308603275544	1.00988206458261	0.00122106768344376	Cxcl10
ENSMUSG00000033174	3636.25678549395	1.00083091159534	1.51931493351877e-12	Mgll
ENSMUSG00000066258	169.287858920906	1.00046633295271	0.000129579757956831	Trim12a
ENSMUSG00000090314	1176.52547291734	0.999741893644136	0.000418448731990839	2310050C09Rik
ENSMUSG00000044349	52.8298578140273	0.999427201454842	0.00810839340259518	Snhg11
ENSMUSG00000030616	112.609366965996	0.998680546425465	0.000949059284299935	Sytl2
ENSMUSG00000026770	43.4602259619691	0.997938575548233	0.0060861965890003	Il2ra
ENSMUSG00000051236	220.260945352614	0.997894072459821	1.35790078454702e-05	Msrb3
ENSMUSG00000017830	111.777253577434	0.99772830626853	0.00827857703180689	Dhx58
ENSMUSG00000035929	1343.85509654868	0.995741506996939	0.00127836628017436	H2-Q4
ENSMUSG00000002289	715.90862208881	0.992574438127033	0.001889906497031	Angptl4
ENSMUSG00000022793	46.5035433383425	0.99231591525178	0.000874751349396091	B4galt4
ENSMUSG00000031389	132.64981619341	0.991557095445665	0.000115857348963937	Arhgap4
ENSMUSG00000028641	109.310255755483	0.990993583454326	0.000416011384795361	P3h1
ENSMUSG00000046879	226.595292837771	0.990162929795859	0.00118458564413247	Irgm1
ENSMUSG00000066442	65.0234340767976	0.98537791622099	0.000239826482954256	Mthfs
ENSMUSG00000074577	369.556711011304	0.98372920198197	3.66963104153447e-06	Ripor3
ENSMUSG00000047735	323.995753695167	0.981925178670588	0.00511924579543992	Samd9l
ENSMUSG00000034059	41.4592699999722	0.980579450286414	0.000620831743889476	Ypel4
ENSMUSG00000025810	83.2257296252569	0.970812121718262	0.00127074642982179	Nrp1
ENSMUSG00000004267	37.2600842060394	0.968790037059916	0.00403987930759388	Eno2
ENSMUSG00000051212	89.6873772465264	0.968242820927245	0.00835071803210127	Gpr183
ENSMUSG00000022489	138.173568564729	0.968187254645403	0.00158081850217331	Pde1b
ENSMUSG00000012126	48.850320337837	0.965717009558441	9.11806763168877e-05	Ubxn11
ENSMUSG00000000486	196.151604021381	0.962847607281369	0.000780645315475793	35673
ENSMUSG00000020150	47.4009565476228	0.962036000512203	0.0058652140802943	Gamt
ENSMUSG00000050063	251.922301287792	0.960154304501736	0.00810685143404865	Klk6
ENSMUSG00000049556	41.8008074766953	0.958989952915291	0.00232725354370414	Lingo1
ENSMUSG00000047415	52.5274091898232	0.956463601583285	0.00325184840605224	Gpr68
ENSMUSG00000041046	168.653295582912	0.953049762945558	7.19353501671779e-05	Ramp3
ENSMUSG00000005672	95.9718490070064	0.950921985805206	0.00164500699018131	Kit
ENSMUSG00000051331	55.8361522531343	0.949185388368113	0.000330930158927687	Cacna1c
ENSMUSG00000042804	81.246855299695	0.945689995929822	0.00732782851966134	Gpr153
ENSMUSG00000039982	246.312484945999	0.942099905957236	3.16927083730512e-06	Dtx4
ENSMUSG00000049866	2404.45363281939	0.940090939781288	1.72218731904648e-08	Arl4c
ENSMUSG00000025993	358.145173201478	0.937655054637188	0.00222527370963055	Slc40a1
ENSMUSG00000025432	167.812279548008	0.937156675242611	0.00039070611632539	Avil
ENSMUSG00000025461	107.282422868799	0.936457105085105	0.00863321770920013	Cd163l1
ENSMUSG00000033152	81.3779730376596	0.936284436379606	0.00112754624829352	Podxl2
ENSMUSG00000068874	261.09878478025	0.935570905634397	1.43326538554292e-05	Selenbp1
ENSMUSG00000028479	114.911160644527	0.935227642082918	4.82164213587234e-06	Gne
ENSMUSG00000049128	779.836520818967	0.934330785030547	0.00362729129014325	Ivl
ENSMUSG00000026473	4631.36397210722	0.933716891959973	2.58334064534113e-09	Glul
ENSMUSG00000029090	1212.76706779039	0.931357349250973	1.69448741056192e-06	Adgra3
ENSMUSG00000031066	91.9152811207518	0.931123268457862	0.000997649325974371	Usp11
ENSMUSG00000023064	207.971919973689	0.92942524898227	0.003667647689082	Sncg
ENSMUSG00000021091	1303.94941931656	0.924193018801134	0.00499395129703697	Serpina3n
ENSMUSG00000038855	1948.64370362489	0.923342185406123	0.0024994149295248	Itpkb
ENSMUSG00000067203	114.255523433195	0.92282771194377	0.000173905134537863	H2-K2
ENSMUSG00000085095	49.5524323588215	0.919375883760617	0.00962746419452338	NA
ENSMUSG00000020566	1039.49108949172	0.919341235718325	0.00067361489118513	Atp6v1c2
ENSMUSG00000044250	83.2208513463006	0.914227458071574	0.00345012696880267	Pced1b
ENSMUSG00000036473	31.167526478027	0.912892368280713	0.00442009229449031	Tbc1d24
ENSMUSG00000022040	88.5810681034083	0.911932836016466	0.00107148883141706	Ephx2
ENSMUSG00000014303	115.52785182249	0.908237889922026	0.000859377657598852	Glis2
ENSMUSG00000031488	1573.84626646971	0.904863675238711	0.00134943874548535	Rab11fip1
ENSMUSG00000049811	67.1630857928157	0.902887823815582	0.00287442009098879	Fam161a
ENSMUSG00000029816	418.529574540647	0.902637999970621	5.85393382439388e-05	Gpnmb
ENSMUSG00000049871	62.9601474502011	0.89981416642051	0.00636504461185233	Nlrc3
ENSMUSG00000020435	37.1642447943259	0.897737967362288	0.00951592775445881	Osbp2
ENSMUSG00000000530	396.307732531708	0.894582108146835	1.52830010937363e-06	Acvrl1
ENSMUSG00000030946	699.524115408432	0.893592570417186	1.06237480664597e-06	Lhpp
ENSMUSG00000029359	248.875452507336	0.892414769048212	0.00419441008110704	Tesc
ENSMUSG00000021306	167.341392707628	0.892097068599907	0.000289858159403928	Gpr137b
ENSMUSG00000014075	102.712847120007	0.891845042047345	9.38890211974915e-05	Tctex1d2
ENSMUSG00000091243	196.000144014812	0.891602814856377	0.00226472587368632	Vgll3
ENSMUSG00000032014	215.344483800853	0.889539792655687	4.69086748465114e-05	Oaf
ENSMUSG00000000409	114.788509052519	0.888777853070911	0.0056572858373804	Lck
ENSMUSG00000000876	946.048630695478	0.887897344561314	9.59860573940782e-13	Pxmp4
ENSMUSG00000037966	1165.07403601294	0.887386990350428	7.08440473991637e-10	Ninj1
ENSMUSG00000007039	238.976832183172	0.886176933757388	3.84907489379989e-05	Ddah2
ENSMUSG00000034127	223.716382439656	0.880760074376738	0.000676434777804207	Tspan8
ENSMUSG00000073755	217.344124692963	0.878847562954044	3.30618241786346e-07	5730409E04Rik
ENSMUSG00000028223	575.001664966302	0.877849314315564	6.49588205516361e-10	Decr1
ENSMUSG00000020604	78.890983987387	0.877777965814708	0.0020462934614724	Arsg
ENSMUSG00000032374	73.0860545183613	0.876038984049351	0.00107783920360006	Plod2
ENSMUSG00000024590	2666.18904664449	0.872305840950658	1.62665959601487e-05	Lmnb1
ENSMUSG00000050921	313.773093664051	0.870229800834679	0.00142823112940855	P2ry10
ENSMUSG00000052331	330.059263126786	0.869152817321944	2.24830423015855e-05	Ankrd44
ENSMUSG00000024691	322.804202444321	0.8666767466737	7.45801170328501e-05	Fam111a
ENSMUSG00000050756	2272.3410588873	0.86655447988853	0.000580746536456624	Defb6
ENSMUSG00000008318	93.3704823383857	0.862190249466095	0.00721464675622173	Relt
ENSMUSG00000022610	171.928207542794	0.862124482253294	4.9262413807041e-05	Mapk12
ENSMUSG00000025511	339.014785810962	0.861273476189664	1.64106849129157e-05	Tspan4
ENSMUSG00000022383	117.112387682443	0.860926722319072	0.000702907140262192	Ppara
ENSMUSG00000039463	226.683444763858	0.855130945983709	1.97709538995523e-06	Slc9a8
ENSMUSG00000023092	259.514953744793	0.854414850936503	0.000581297680691367	Fhl1
ENSMUSG00000053641	1526.82481761272	0.854313181409494	0.000400449619622823	Dennd4a
ENSMUSG00000010609	160.828433600845	0.853034151199563	3.64806069754207e-07	Psen2
ENSMUSG00000036832	164.363347559706	0.85299445816796	0.00136802563115661	Lpar3
ENSMUSG00000022657	80.4503071240272	0.852324458027145	0.00670064168336793	Cd96
ENSMUSG00000031936	220.733349085817	0.852322102182331	0.00529682087498935	Hephl1
ENSMUSG00000033467	440.975445631468	0.852066563579406	5.67635919544806e-11	Crlf2
ENSMUSG00000031266	542.647436444321	0.850561534759551	0.00161310115257861	Gla
ENSMUSG00000024427	98.8768281873498	0.850518710938286	0.000837081053398902	Spry4
ENSMUSG00000026360	2071.43187199971	0.848385221908938	0.000169943574258915	Rgs2
ENSMUSG00000110841	183.056049462587	0.845631716500587	0.000189350937777652	NA
ENSMUSG00000085022	120.724033099024	0.844531106959191	0.0093093083671182	Gm5860
ENSMUSG00000040703	417.520985823317	0.843678765325235	6.55399399930824e-08	Cyp2s1
ENSMUSG00000050103	93.106465066713	0.841129028060325	0.00361347782140707	Agmo
ENSMUSG00000031246	687.536793842409	0.839609179639114	3.06005172206154e-07	Sh3bgrl
ENSMUSG00000033705	66.3816942003297	0.838608030539348	0.00680189686941797	Stard9
ENSMUSG00000023809	90.4251856039211	0.838466453593153	0.00048431449250965	Rps6ka2
ENSMUSG00000040488	7828.94852972225	0.838078184861121	1.38144435522075e-15	Ltbp4
ENSMUSG00000003541	4922.85517824364	0.837772779023337	0.00186256491592611	Ier3
ENSMUSG00000026435	151.743647242009	0.836803119236301	2.03881931383925e-06	Slc45a3
ENSMUSG00000076431	508.571307761601	0.836280187437612	0.000695845366395897	Sox4
ENSMUSG00000022206	357.659547751347	0.834399743424794	0.000285503436743004	Npr3
ENSMUSG00000024036	84.7428583459432	0.834210230650707	0.000486682882319504	Slc37a1
ENSMUSG00000024247	126.313106868577	0.827335494784975	1.050746918e-05	Pkdcc
ENSMUSG00000055301	2843.83323508485	0.82696709443551	1.50593344231339e-05	Adh7
ENSMUSG00000037337	110.810210657443	0.826894555514794	0.00013048371496799	Map4k1
ENSMUSG00000089789	449.462607442718	0.826170376753721	0.00592015240438474	Rdh1
ENSMUSG00000034926	11517.7594999513	0.824412546076133	7.56826594329383e-05	Dhcr24
ENSMUSG00000030917	863.383950961714	0.823710275937994	2.53270978847654e-09	Tmem159
ENSMUSG00000000739	658.700396511176	0.823500439601526	0.00165250488354596	Sult5a1
ENSMUSG00000020092	296.992708366774	0.822936330015543	2.78182050085905e-10	Pald1
ENSMUSG00000047414	223.987827858448	0.819580294483923	0.00162340562276627	Flrt2
ENSMUSG00000032436	163.814646877262	0.819466977921928	1.80940726411221e-07	Cmtm7
ENSMUSG00000039405	577.264429496552	0.819091492436434	0.00430833559537754	Prss23
ENSMUSG00000038372	111.312531758236	0.81739734401434	0.000496898825491586	Gmds
ENSMUSG00000046402	233.156692913849	0.81541499432371	0.00593009120725686	Rbp1
ENSMUSG00000023266	99.682750084713	0.815260528921249	0.000299298202531586	Frs3
ENSMUSG00000033187	189.368110219847	0.813878118700335	3.65971298288599e-05	BC016579
ENSMUSG00000035458	56.9667019579577	0.813217081297216	0.00177014075238834	Tnni3
ENSMUSG00000015957	194.399976667531	0.811141783569834	0.00153882520511124	Wnt11
ENSMUSG00000002108	50.8831243917058	0.810298954455554	0.00506445227859656	Nr1h3
ENSMUSG00000020644	1212.84074032839	0.810129508030779	0.000641915236142513	Id2
ENSMUSG00000021379	443.8433143287	0.807734808623024	0.000255746326320297	Id4
ENSMUSG00000038777	88.554108861726	0.807613568770337	0.00411457385972362	Sema6c
ENSMUSG00000037960	711.261483894	0.807046938468515	7.97418810761796e-07	Card19
ENSMUSG00000002058	160.141630323513	0.806051769522195	0.00117194445559479	Unc119
ENSMUSG00000036169	1317.85174036291	0.805770735974194	0.000162489023656834	Sostdc1
ENSMUSG00000027761	739.334279481778	0.805069066957969	3.82557571655259e-06	Aadac
ENSMUSG00000022240	153.702643450114	0.804854565779737	0.00375880226184162	Ctnnd2
ENSMUSG00000054146	22442.9696543302	0.804679283334385	3.51917729159376e-05	Krt15
ENSMUSG00000055368	428.227001527131	0.803113863814212	0.00138910956439413	Slc6a2
ENSMUSG00000011263	251.10731915422	0.79938565712942	0.000530789798050956	Exoc3l2
ENSMUSG00000019832	674.446512541531	0.797702709806938	0.000184059242107672	Rab32
ENSMUSG00000023074	390.408287136375	0.797620021329703	1.05210023392998e-11	Mospd1
ENSMUSG00000032740	108.80666480321	0.796647617324409	0.005749419523132	Ccdc88a
ENSMUSG00000037855	144.87499027725	0.796462769194803	0.000294662481050204	Zfp365
ENSMUSG00000024462	475.395452394907	0.794178205470315	0.000386646285604174	Gabbr1
ENSMUSG00000047045	1277.84816200534	0.791702385998887	7.24436340889889e-10	Tmem164
ENSMUSG00000038594	109.888626741973	0.791194581656318	7.32477551101945e-05	Cep85l
ENSMUSG00000031740	1909.4204362411	0.789888108892632	8.11204701766347e-08	Mmp2
ENSMUSG00000061815	106.907434286111	0.789109557734604	0.000645511121872479	Rufy4
ENSMUSG00000006360	2444.40853365591	0.788743910149731	0.0070069712785145	Crip1
ENSMUSG00000042842	76.3418570051933	0.787897808946515	0.00483699252227053	Serpinb6b
ENSMUSG00000028980	149.583201914133	0.786456304749938	0.0002141883016416	H6pd
ENSMUSG00000024338	381.033233163629	0.784369232563521	0.00619512652460683	Psmb8
ENSMUSG00000028393	1068.43331956002	0.783483412144193	4.87801096849833e-05	Alad
ENSMUSG00000031278	1320.27275070418	0.783007098465682	1.10032496131536e-08	Acsl4
ENSMUSG00000038893	398.435189912865	0.779155020759747	0.000694297195544185	Fam117a
ENSMUSG00000020453	121.133477151242	0.778437483336248	0.000780645315475793	Patz1
ENSMUSG00000015312	6304.94239302337	0.778081736169016	0.00125542005389033	Gadd45b
ENSMUSG00000038936	241.733584812623	0.774663849351682	2.22408390086479e-05	Sccpdh
ENSMUSG00000031565	3770.1796263611	0.774334848431024	4.19277997270682e-06	Fgfr1
ENSMUSG00000026483	350.132012849739	0.773921980188729	0.000798859225807478	Fam129a
ENSMUSG00000025557	287.366363950617	0.772491500301304	3.7933255835446e-06	Slc15a1
ENSMUSG00000026785	673.297842891602	0.77101149878328	6.71615318371782e-12	Pkn3
ENSMUSG00000073889	763.681823981055	0.770852436949897	8.32080013169212e-05	Il11ra1
ENSMUSG00000007783	95.9176776930319	0.770817679499823	0.00334623288288604	Cpt1c
ENSMUSG00000030605	4332.0990518569	0.770743960747459	0.00413146738931921	Mfge8
ENSMUSG00000020601	118.843576202383	0.770566080171025	0.00108401323869041	Trib2
ENSMUSG00000019102	5848.09862100102	0.769260867460869	4.37253059463563e-05	Aldh3a1
ENSMUSG00000006369	516.704560934081	0.769250089092348	0.000375339037208197	Fbln1
ENSMUSG00000031805	273.108473689607	0.76770799891343	0.00185834235797722	Jak3
ENSMUSG00000027230	233.374573877092	0.762417175122174	0.000908416892910406	Creb3l1
ENSMUSG00000030047	348.356071279153	0.759200461072579	0.000151932355435922	Arhgap25
ENSMUSG00000051790	583.662741446695	0.751631889636645	0.000450538627789491	Nlgn2
ENSMUSG00000000531	940.651456868387	0.751391757854531	0.0067107495349557	Grasp
ENSMUSG00000029821	98.1692198503661	0.750858453718269	0.00402283845550397	Gsdme
ENSMUSG00000015243	1301.88925606862	0.750503751485016	0.000327871114811442	Abca1
ENSMUSG00000053687	226.226779752649	0.750501616703982	0.00232725354370414	Dpep2
ENSMUSG00000020121	217.226504451565	0.747162058296098	0.00192540727638538	Srgap1
ENSMUSG00000028100	466.345113386529	0.746698836365764	0.000476677313271381	Nudt17
ENSMUSG00000022018	2103.4154538357	0.74460670449876	3.65122334461671e-07	Rgcc
ENSMUSG00000008540	2522.72335199368	0.740791001524343	0.0001891049882457	Mgst1
ENSMUSG00000038552	125.653477661667	0.738067925677649	0.00919985359332103	Fndc4
ENSMUSG00000024654	85.0091023935785	0.737351920839355	0.00515467123175997	Asrgl1
ENSMUSG00000049404	1236.26973272252	0.736647894138331	0.00612132287165903	Rarres1
ENSMUSG00000045917	118.199612752607	0.736617813467373	9.65936583602664e-05	Tmem268
ENSMUSG00000037003	941.133416963415	0.736072235305955	9.95701062513624e-06	Tns2
ENSMUSG00000039959	323.21379443677	0.735186782119822	0.00617037340720831	Hip1
ENSMUSG00000051323	268.029173743611	0.735138734424062	0.00626120297082151	Pcdh19
ENSMUSG00000054150	300.431683803843	0.732570637176396	0.00136119990164578	Syne3
ENSMUSG00000004105	1775.63202882599	0.732209655735377	0.00281389954293551	Angptl2
ENSMUSG00000002603	1476.29700694917	0.731731220927474	1.97138478543679e-07	Tgfb1
ENSMUSG00000035713	58.7223231310054	0.728875890456798	0.00179318500617012	Usp35
ENSMUSG00000033502	174.808842298202	0.728741479486856	7.03561834815502e-05	Cdc14a
ENSMUSG00000042066	74.1790567713163	0.728206584001221	0.00123854260323794	Tmcc2
ENSMUSG00000102644	271.153292318656	0.726403502369351	2.83671324348752e-05	Thap6
ENSMUSG00000055322	3084.48030413823	0.725265496038159	0.000827551355725591	Tns1
ENSMUSG00000026094	1615.07150806997	0.718275603669556	0.0015280116858745	Stk17b
ENSMUSG00000061397	23946.6632019636	0.717444104970271	1.66442107176585e-05	Krt79
ENSMUSG00000019368	906.613786626713	0.716292171761542	0.00932328688483815	Sec14l4
ENSMUSG00000025321	275.286784112415	0.715305003301755	0.00574771031500634	Itgb8
ENSMUSG00000108601	97.1031536852361	0.713963048712586	0.000779454221647893	NA
ENSMUSG00000032369	144.430580389371	0.709382657321511	0.00215699390913474	Plscr1
ENSMUSG00000041736	2831.52029984085	0.709120190980428	6.2414051500007e-06	Tspo
ENSMUSG00000033530	128.06092385479	0.708801207457672	0.00156340974996667	Ttc7b
ENSMUSG00000055639	173.502843858702	0.703623655236451	0.00562667088288447	Dach1
ENSMUSG00000019055	272.135863348846	0.699168002734781	0.000331067275490309	Plod1
ENSMUSG00000030410	438.653011643113	0.696232196011954	7.19132504759199e-05	Dmwd
ENSMUSG00000023277	158.839133628083	0.695608599473355	0.000561117614590547	Twf2
ENSMUSG00000024014	6507.42184419979	0.69479774840095	0.00247320437661009	Pim1
ENSMUSG00000024661	25571.2345588308	0.692588705691536	0.00012485897974852	Fth1
ENSMUSG00000063439	193.173108472072	0.686223734074149	0.00481422254297515	B9d2
ENSMUSG00000022747	408.426603480841	0.684682974866411	1.54605340152932e-06	St3gal6
ENSMUSG00000047090	253.350837308962	0.683702283952872	0.000272894513030517	Tmem198b
ENSMUSG00000024846	10235.1762790032	0.682157651973837	0.000399366676342728	Cst6
ENSMUSG00000074916	130.874982112777	0.681479493342522	0.00238578812121796	Chst14
ENSMUSG00000032656	145.646024559954	0.681097775458686	0.000570114565277425	March3
ENSMUSG00000025795	1490.56446754752	0.680258130425161	2.23135883366123e-07	Rassf3
ENSMUSG00000022555	1647.07230454171	0.680075984483183	2.34196216914965e-05	Dgat1
ENSMUSG00000020227	529.628197810863	0.679952021750213	0.00051394425706125	Irak3
ENSMUSG00000027931	419.51292502865	0.67866374049876	9.71237752162908e-07	Npr1
ENSMUSG00000031015	517.342779606819	0.677172451934153	3.46528002785698e-05	Swap70
ENSMUSG00000017493	1315.91883821515	0.676831361818824	0.00294233747875262	Igfbp4
ENSMUSG00000026655	1528.34822037672	0.674473384234034	0.00493834079299752	Fam107b
ENSMUSG00000005836	289.35867741015	0.672488740705766	0.00186691748805647	Gata6
ENSMUSG00000063889	512.575808780909	0.672209973777793	0.000939610475238459	Crem
ENSMUSG00000015714	748.412271098227	0.671026066986134	0.00157707524248615	Cers2
ENSMUSG00000022708	201.456720837982	0.670016933839067	0.0014674520108642	Zbtb20
ENSMUSG00000019872	662.441922055855	0.667877798278702	7.04549697390304e-06	Smpdl3a
ENSMUSG00000021994	112.167815169599	0.666130467475247	0.0078781162523165	Wnt5a
ENSMUSG00000055254	1229.59251697415	0.665490448705428	0.00908704056963354	Ntrk2
ENSMUSG00000026826	1704.07269707129	0.658451023922832	0.00814975508494791	Nr4a2
ENSMUSG00000027805	243.403129874401	0.658113688551433	0.000171215077114804	Pfn2
ENSMUSG00000017754	618.699312301013	0.657424429778443	0.00015009737380618	Pltp
ENSMUSG00000065954	527.27011261378	0.656227534783827	4.1599281699033e-05	Tacc1
ENSMUSG00000023191	192.370329197322	0.655822100274133	0.000387251263394389	P3h3
ENSMUSG00000021457	1394.52360691719	0.651433196141045	0.00898206664189481	Syk
ENSMUSG00000050379	217.881834557673	0.651280931524882	0.000378926319111858	37499
ENSMUSG00000036748	571.258956532104	0.645798938624449	3.35646612222692e-06	Cuedc2
ENSMUSG00000035104	222.847022692401	0.644358018390023	0.00233244751419497	Eva1a
ENSMUSG00000057329	175.37569762396	0.644099144968671	0.000803098073671392	Bcl2
ENSMUSG00000027605	507.025453667101	0.643409609470026	8.41982953055923e-05	Acss2
ENSMUSG00000028194	111.141930694162	0.639671129898057	0.00453223533767392	Ddah1
ENSMUSG00000030256	695.091901106637	0.637854893194124	0.00070761412853101	Bhlhe41
ENSMUSG00000023008	319.859105791699	0.636865266163511	0.000632163907280616	Fmnl3
ENSMUSG00000056501	9093.22529365319	0.636204964469067	2.81463018418586e-06	Cebpb
ENSMUSG00000038366	1837.49294089212	0.632498257323485	0.00014658135104535	Lasp1
ENSMUSG00000060477	1119.96240104479	0.627160406739747	0.00239509499941188	Irak2
ENSMUSG00000020422	1086.42727908856	0.627032568643492	0.00693846454928146	Tns3
ENSMUSG00000075706	2480.85972758064	0.626210422527838	0.000261216734850736	Gpx4
ENSMUSG00000046768	217.651728899244	0.625004788401501	0.000988358368608511	Rhoj
ENSMUSG00000021453	901.168025105952	0.621612036195335	0.00274883147930291	Gadd45g
ENSMUSG00000071379	582.568705708863	0.614226062103782	1.24250063227198e-07	Hpcal1
ENSMUSG00000040690	3056.59114142915	0.613907024777511	0.000414924197850452	Col16a1
ENSMUSG00000025213	331.134533634388	0.613112718183408	0.00165250488354596	Kazald1
ENSMUSG00000024772	3005.73363609305	0.61276867196443	0.000188735825419313	Ehd1
ENSMUSG00000021830	434.435550808075	0.612121133134469	0.004067433781343	Txndc16
ENSMUSG00000051427	129.794494877076	0.609826131506882	0.00732480945215985	Ccdc157
ENSMUSG00000030029	2203.82099213535	0.607743803428333	0.00169528728667225	Lrig1
ENSMUSG00000063275	65.2360084321471	0.606923027031858	0.00352051862514511	Hacd1
ENSMUSG00000050288	297.481940807784	0.60551116197003	0.00341587024064798	Fzd2
ENSMUSG00000001504	1914.74108763598	0.605490695219785	0.000217192508338915	Irx2
ENSMUSG00000033032	183.317933604735	0.604067384494566	0.00953457210676337	Afap1l1
ENSMUSG00000021665	658.972324047692	0.603669363988584	2.61955057123214e-05	Hexb
ENSMUSG00000044788	143.929486224081	0.603536898380284	0.00473125230680348	Fads6
ENSMUSG00000024193	969.940082104918	0.603447437469608	1.01040346940133e-07	Phf1
ENSMUSG00000031903	223.067570584081	0.602116084806353	0.00339347606416242	Pla2g15
ENSMUSG00000044968	89.572567668392	0.601691349999709	0.0091845504559429	Napepld
ENSMUSG00000022982	2324.59134265857	0.601649636672312	0.000120585516464881	Sod1
ENSMUSG00000029672	417.315747157212	0.599973254571073	0.000856016104551066	Fam3c
ENSMUSG00000013419	186.9680768602	0.597230041596765	0.000397615964626402	Zfp651
ENSMUSG00000071847	1431.88671365087	0.596673115616935	0.00385293768456755	Apcdd1
ENSMUSG00000001918	1066.2768171031	0.594232739360889	1.13305157703276e-06	Slc1a5
ENSMUSG00000040680	300.825638340781	0.593549631453825	0.00405878229481259	Kremen2
ENSMUSG00000058022	666.284003628348	0.592550915341177	6.95936471736604e-05	Adtrp
ENSMUSG00000032735	260.523687371806	0.591929615960468	0.00634509785174871	Ablim3
ENSMUSG00000034312	785.989916162677	0.587310193254534	0.00490096935734745	Iqsec1
ENSMUSG00000057751	2058.03986446351	0.587203528845244	0.000524388010569699	Megf6
ENSMUSG00000026576	210.790149660521	0.586745329136204	0.00649904828457917	Atp1b1
ENSMUSG00000042364	1304.50379103471	0.585826475629328	9.90325641022106e-05	Snx18
ENSMUSG00000107881	252.049252867905	0.585670535366466	0.00164500699018131	NA
ENSMUSG00000038393	5644.07174548121	0.579887968577851	0.000349824621518682	Txnip
ENSMUSG00000021417	1245.2968820018	0.577094524244075	0.00198168378334442	Eci2
ENSMUSG00000035504	345.518846526293	0.569066733530565	0.000830538889608228	Reep6
ENSMUSG00000040339	559.439618353788	0.566954441373451	0.00545519163431812	Fam102b
ENSMUSG00000033460	259.502041735717	0.565834926988667	0.00270759878278249	Armcx1
ENSMUSG00000004032	1124.57551060487	0.563790250825373	0.000894156730212404	Gstm5
ENSMUSG00000026031	1562.05621117671	0.560410144584949	0.00271415667974341	Cflar
ENSMUSG00000033685	5841.16907416009	0.559161667096358	0.000101506741445679	Ucp2
ENSMUSG00000035901	1044.8696336373	0.557842705003963	0.00122505149478214	Dennd5a
ENSMUSG00000034285	246.348728493178	0.556862611512857	0.00397482418560378	Nipsnap1
ENSMUSG00000007038	505.815492647188	0.556286761353027	0.000370110216489324	Neu1
[truncated: 347 more rows]

## Sheet: Vehicle treatment
gene	baseMean	log2FoldChange	padj	symbol
ENSMUSG00000024011	360.136311445314	5.42721483130824	4.57159535046555e-37	Pi16
ENSMUSG00000023224	459.800820124955	4.13092327965456	2.03268068057095e-30	Serping1
ENSMUSG00000020902	136.764624958921	4.24520672661807	5.41655622929561e-24	Ntn1
ENSMUSG00000041220	5138.29937676071	2.03541506022057	5.56120610853683e-20	Elovl6
ENSMUSG00000029675	169.308111762953	5.71854704516584	8.3729474766575e-20	Eln
ENSMUSG00000026574	148.97097520113	4.0920252875504	1.02028633770026e-19	Dpt
ENSMUSG00000025608	91.9681388799938	4.0053676129345	1.23241023317607e-19	Podxl
ENSMUSG00000021388	98.59136964838	3.5718050926481	4.52204352874878e-18	Aspn
ENSMUSG00000025202	477.915748855496	2.61671264330198	6.81760550371753e-18	Scd3
ENSMUSG00000001506	1070.89353726801	4.07830249139692	8.71210125094842e-18	Col1a1
ENSMUSG00000002944	104.043928904372	2.91721867271546	1.54257698383622e-17	Cd36
ENSMUSG00000026697	749.772016547737	4.91404639970155	1.58584271972793e-17	Myoc
ENSMUSG00000019846	261.695012231959	2.21446906773257	2.66878825630849e-17	Lama4
ENSMUSG00000026043	1259.82736127343	5.47735590586226	3.12189316381172e-17	Col3a1
ENSMUSG00000054580	102.261575814423	3.01370796154912	1.05158773784969e-16	Pla2r1
ENSMUSG00000042010	411.934369079165	1.82351360883126	1.91795780618239e-16	Acacb
ENSMUSG00000026582	83.1386859517375	4.26815916145396	4.82433614801054e-16	Sele
ENSMUSG00000029096	95.9327953666317	4.77122516911269	1.04495782122203e-15	Htra3
ENSMUSG00000071984	277.225792462697	2.23224795158325	1.15552400164972e-15	Fndc1
ENSMUSG00000005397	226.556249394275	3.68488544930422	1.21238352833337e-15	Nid1
ENSMUSG00000023959	40.5967734728669	3.92954124289392	1.48198963179566e-15	Clic5
ENSMUSG00000025784	218.967906136113	4.42179456024042	2.02809175146907e-15	Clec3b
ENSMUSG00000075289	180.530092729158	3.11143561232926	3.95493945701162e-15	Carns1
ENSMUSG00000032334	84.9980531397804	4.32810790511749	4.65635432361747e-15	Loxl1
ENSMUSG00000030787	298.878095579286	2.95708512652054	5.76183393547615e-15	Lyve1
ENSMUSG00000026586	127.283487549366	3.9454276589471	7.25328664791787e-15	Prrx1
ENSMUSG00000031871	113.626953501966	4.19533646446066	7.25328664791787e-15	Cdh5
ENSMUSG00000036446	94.8680920324933	5.6825706542323	1.59857984502627e-14	Lum
ENSMUSG00000042453	92.1407263123945	3.95354398132135	4.42309404289618e-14	Reln
ENSMUSG00000074589	36.1917738700422	3.58747023451618	9.76132557580573e-14	Gm16527
ENSMUSG00000058966	179.681490545583	2.06788267809437	1.9773460427413e-13	Fam57b
ENSMUSG00000037348	1306.12625711502	1.71981524820685	2.55621330396929e-13	Paqr7
ENSMUSG00000003617	70.0786347789153	3.95115657421129	2.57045310819737e-13	Cp
ENSMUSG00000066364	1548.78683249001	2.21810701523452	2.88383175131875e-13	Serpina3b
ENSMUSG00000026853	585.705416420359	1.23062223434139	4.15797355636015e-13	Crat
ENSMUSG00000024526	235.157365091492	2.94715484733303	4.15797355636015e-13	Cidea
ENSMUSG00000033419	60.2422669573166	2.99212032159895	4.62886881910284e-13	Snap91
ENSMUSG00000026185	792.589313411788	3.28103725526873	8.39580889475564e-13	Igfbp5
ENSMUSG00000078507	171.228052854981	2.16798593308766	8.39580889475564e-13	Aadacl3
ENSMUSG00000021319	102.520052784419	6.32057403203756	1.77675362231512e-12	Sfrp4
ENSMUSG00000090527	70.2718579487343	3.10064161766534	1.97962132291357e-12	Aadacl2fm2
ENSMUSG00000022032	58.642881988336	5.62918286423991	2.55962616148042e-12	Scara5
ENSMUSG00000070419	32.0409472947667	3.47485472380702	2.60057539010544e-12	Cyp3a57
ENSMUSG00000062960	73.962511240727	4.28380599215961	2.90269068947072e-12	Kdr
ENSMUSG00000019883	1502.6122459276	0.715267897205271	3.21252449339254e-12	Echdc1
ENSMUSG00000004655	241.296082037229	4.33362697483761	3.41709415709454e-12	Aqp1
ENSMUSG00000022548	235.514599006071	4.44734493872203	3.41709415709454e-12	Apod
ENSMUSG00000020363	179.637447513455	3.71500049516301	5.44039167323273e-12	Gfpt2
ENSMUSG00000037071	17256.2290015764	1.4957776228317	1.08980512048797e-11	Scd1
ENSMUSG00000034926	11517.7594999513	1.37255655903839	1.40368088144372e-11	Dhcr24
ENSMUSG00000034205	45.2014866587725	3.34728088260407	1.79370848298586e-11	Loxl2
ENSMUSG00000056481	76.7744053114277	2.64165183524135	2.03149004867565e-11	Cd248
ENSMUSG00000022425	51.1562959079274	3.08865658731992	2.07271059205882e-11	Enpp2
ENSMUSG00000010175	44.390579456887	3.11362972064056	3.78390380696104e-11	Prox1
ENSMUSG00000007480	42.3153262804488	3.19068072288848	4.69747275189877e-11	Mc5r
ENSMUSG00000064080	266.3375609984	2.35406696953346	7.82827144570373e-11	Fbln2
ENSMUSG00000022129	58.2298301354425	2.4165117160399	8.21095865539711e-11	Dct
ENSMUSG00000033174	3636.25678549395	0.960355802453613	8.30436344756998e-11	Mgll
ENSMUSG00000032024	192.651488435535	2.43830375296155	8.45842246961996e-11	Clmp
ENSMUSG00000056973	121.293688940031	3.16491317631301	1.00793756469372e-10	Ces1d
ENSMUSG00000081225	38.227427745439	3.04636120940563	1.18165600792047e-10	Cyp2j12
ENSMUSG00000026814	118.614277606734	3.01501017402576	1.23983170092457e-10	Eng
ENSMUSG00000029603	28.5812925259563	4.66176756012261	1.68738461632699e-10	Dtx1
ENSMUSG00000029661	1063.57540978922	4.15094151028979	1.68738461632699e-10	Col1a2
ENSMUSG00000024164	507.782428831413	3.53343372852669	1.81748673954094e-10	C3
ENSMUSG00000056492	50.0383458355555	3.93549894277497	2.64803595288775e-10	Adgrf5
ENSMUSG00000034845	133.949697696871	2.93305773197073	2.8665415906422e-10	Plvap
ENSMUSG00000070609	152.378115120228	1.99930740996854	2.96298019887494e-10	Aadacl4
ENSMUSG00000039428	1211.22257229913	0.41945966088623	3.33822174405255e-10	Tmem135
ENSMUSG00000038463	30.8392807540546	4.5365731004731	3.79819029856859e-10	Olfml2b
ENSMUSG00000008153	81.6811467961829	3.03828286321469	3.85127041347692e-10	Clstn3
ENSMUSG00000019809	1095.11860673082	0.492927574899139	3.85127041347692e-10	Pex3
ENSMUSG00000033191	109.952644813985	4.15456572179328	5.31180769797841e-10	Tie1
ENSMUSG00000031849	100.585845765037	3.64538072813409	5.39692732061273e-10	Comp
ENSMUSG00000069919	1627.23189419907	5.91404659312783	6.82615099311777e-10	Hba-a1
ENSMUSG00000090698	84.1169793015416	3.3909202759774	7.3040471637816e-10	Apold1
ENSMUSG00000006386	30.5657041218914	3.87723803269069	7.48812083223728e-10	Tek
ENSMUSG00000045092	70.8773461662798	3.33265547322504	7.80461247704256e-10	S1pr1
ENSMUSG00000021091	1303.94941931656	2.32107953589986	7.80461247704256e-10	Serpina3n
ENSMUSG00000018868	101.679380955122	2.62475378737821	1.03102084993224e-09	Pnpla5
ENSMUSG00000005338	133.714325807488	3.01847913051334	1.057644225095e-09	Cadm3
ENSMUSG00000041445	29.8897002457693	4.09322467526902	1.09157871576824e-09	Mmrn2
ENSMUSG00000015568	189.556277292398	2.63949422842134	1.11070321415747e-09	Lpl
ENSMUSG00000007097	43.0616569788086	2.53988575248397	1.24039085815794e-09	Atp1a2
ENSMUSG00000022623	68.4798541341472	2.66799520094763	1.42683502841992e-09	Shank3
ENSMUSG00000026921	62.2433211541448	3.63727741042053	2.2845165913079e-09	Egfl7
ENSMUSG00000038725	23.9884152455527	3.59984909505028	2.31982746613327e-09	Pkhd1l1
ENSMUSG00000036887	135.373013205126	2.17580647945151	3.68641509548406e-09	C1qa
ENSMUSG00000041737	98.4345018299192	1.9308121608878	4.36191602099959e-09	Tmem45b
ENSMUSG00000020154	45.7751657220522	4.03198098048516	4.64475603333958e-09	Ptprb
ENSMUSG00000026365	48.5699435829419	4.66577449437658	5.07954995548292e-09	Cfh
ENSMUSG00000047867	51.0261578629595	3.87003985050447	5.19435289666708e-09	Gimap6
ENSMUSG00000023019	115.114923914641	2.47293047240351	6.20667240069465e-09	Gpd1
ENSMUSG00000027016	23.5331058174809	3.32214066513149	6.85088721414737e-09	Zfp385b
ENSMUSG00000022371	93.9318688537412	2.89534693548104	7.51587098928838e-09	Col14a1
ENSMUSG00000036896	61.8140418680399	3.69413646106207	8.48730929866793e-09	C1qc
ENSMUSG00000022816	507.563891927621	3.27198973533883	1.17286683885826e-08	Fstl1
ENSMUSG00000036545	65.4085456421877	2.72967377081537	1.26266446313694e-08	Adamts2
ENSMUSG00000027318	27.3993054852428	3.44446549902959	1.27205392457937e-08	Adam33
ENSMUSG00000025270	191.373771871672	4.8270571525785	1.34969017382054e-08	Alas2
ENSMUSG00000036905	71.8608949147531	2.95914330292752	1.46988750702859e-08	C1qb
ENSMUSG00000039115	35.9371135925418	4.01841125664008	1.88974129104915e-08	Itga9
ENSMUSG00000015665	141.025126588099	2.09332442096843	2.17676584600286e-08	Awat1
ENSMUSG00000038156	48.5242444455794	3.72881677783067	2.39654393201125e-08	Spon1
ENSMUSG00000057098	31.7380590796083	5.03323431511534	2.9925361648058e-08	Ebf1
ENSMUSG00000030116	173.43144561541	5.44335555352871	3.06527360870366e-08	Mfap5
ENSMUSG00000041735	47.4297398661928	2.94737655088472	3.2044873547047e-08	AAdacl4fm3
ENSMUSG00000026600	621.578614074921	3.2471954556361	3.66666767658494e-08	Soat1
ENSMUSG00000028494	2369.05607775996	1.42714321483588	4.06352223047172e-08	Plin2
ENSMUSG00000043631	28.8329639877602	2.84489434171131	4.06352223047172e-08	Ecm2
ENSMUSG00000031502	758.426971026926	1.62443846451737	4.33818499379757e-08	Col4a1
ENSMUSG00000079013	1512.46392761101	2.74985599081317	4.78528458691121e-08	Serpina3j
ENSMUSG00000090523	37.5010476669775	4.38037637396637	5.81527135745332e-08	Gypc
ENSMUSG00000015354	95.0848585429234	2.42329241551745	5.85412332561207e-08	Pcolce2
ENSMUSG00000019890	28.8975484476158	3.53786294501899	5.88267999307125e-08	Nts
ENSMUSG00000000753	314.573589487213	4.4863856902317	7.26734973896254e-08	Serpinf1
ENSMUSG00000036103	24.6873839905834	3.91367496607589	7.33206868291272e-08	Colec12
ENSMUSG00000024420	25.779853538094	4.39344074214822	8.05191125434241e-08	Zfp521
ENSMUSG00000030303	1324.25069250258	3.03320556301551	8.8866738522351e-08	Far2
ENSMUSG00000029309	40.0441337402625	3.84447423405393	9.3905910630662e-08	Sparcl1
ENSMUSG00000049685	180.174226072885	4.26477134733954	1.03436118761196e-07	Cyp2g1
ENSMUSG00000021903	55.9769106117393	3.67180257637634	1.12494117609135e-07	Galnt15
ENSMUSG00000059316	4315.75079062175	0.776410103786501	1.18023854053578e-07	Slc27a4
ENSMUSG00000020717	175.807635603625	3.02236862452745	1.18619307030218e-07	Pecam1
ENSMUSG00000021614	268.123352660855	3.42242769260068	1.22597077109341e-07	Vcan
ENSMUSG00000016494	284.985343503524	1.7663798827344	1.2971465145425e-07	Cd34
ENSMUSG00000027605	507.025453667101	0.857248014147565	1.40471523847068e-07	Acss2
ENSMUSG00000027204	459.981522195529	4.63438817966685	1.41045477768035e-07	Fbn1
ENSMUSG00000016024	371.535540763118	3.42974442423571	1.41045477768035e-07	Lbp
ENSMUSG00000073418	64.1560827418353	2.54897442805066	1.46292023784904e-07	C4b
ENSMUSG00000041112	143.157517737044	1.58093355494196	1.50523086858783e-07	Elmo1
ENSMUSG00000026837	221.843072899046	2.14817925555416	1.52672606661436e-07	Col5a1
ENSMUSG00000027869	192.439851111972	3.19390695219155	1.70973923805149e-07	Hsd3b6
ENSMUSG00000027656	49.6452096667847	4.76322055475488	2.20996367249988e-07	Ccn5
ENSMUSG00000027474	21.1935047494512	3.51140499261862	2.30995051326346e-07	Ccm2l
ENSMUSG00000037362	178.034923000253	3.83540475615204	2.34672476031429e-07	Ccn3
ENSMUSG00000037206	24.2005162314526	4.56092581637799	2.45594749518173e-07	Islr
ENSMUSG00000079049	25.597975160789	2.98813661168506	2.79612782112873e-07	Serpinb1c
ENSMUSG00000032125	21.2688154693437	6.60116687570274	3.06736404925976e-07	Robo4
ENSMUSG00000005994	29.1693658439628	3.02334315061184	3.12379949758567e-07	Tyrp1
ENSMUSG00000078504	20.2839055584019	2.84929483966366	3.38109586128276e-07	Aadacl4fm5
ENSMUSG00000054690	33.1799063290109	4.05220005955967	3.39849182571904e-07	Emcn
ENSMUSG00000020676	57.5790319245524	4.82567451864856	3.39849182571904e-07	Ccl11
ENSMUSG00000034127	223.716382439656	1.45361202213895	3.82313875211769e-07	Tspan8
ENSMUSG00000041012	63.776691551361	1.50830200030798	3.89428856174426e-07	Cmtm8
ENSMUSG00000041378	79.347230896404	4.11676996152323	4.08916771724902e-07	Cldn5
ENSMUSG00000029718	203.692669415271	1.96936801557176	5.29478575812598e-07	Pcolce
ENSMUSG00000021751	48.4016302861255	2.54143733446815	5.48853228989672e-07	Acox2
ENSMUSG00000072941	267.343079469791	3.21992354189478	5.49786313008363e-07	Sod3
ENSMUSG00000026193	1430.70430877746	3.37343041744225	6.03607798673555e-07	Fn1
ENSMUSG00000027931	419.51292502865	0.747453751085828	6.19025961468398e-07	Npr1
ENSMUSG00000021186	33.8363669372876	3.46580724095348	6.53696574573546e-07	Fbln5
ENSMUSG00000041577	442.302929853632	2.3800596264055	6.74605864510623e-07	Prelp
ENSMUSG00000020053	20.6527304174508	6.43961414941463	6.76681442641884e-07	Igf1
ENSMUSG00000015053	35.0047239525319	2.96370972052296	6.78238723824962e-07	Gata2
ENSMUSG00000031220	96.0515098151359	1.49753609923846	7.06787840949208e-07	Awat2
ENSMUSG00000095213	33.4696949776287	2.5085469278216	9.55635981149492e-07	NA
ENSMUSG00000028073	59.3496265684778	2.29118334251696	1.00489813710965e-06	Pear1
ENSMUSG00000048126	186.817317281817	4.06175501025386	1.11656052631349e-06	Col6a3
ENSMUSG00000046207	52.1142216614632	1.40631029939297	1.17834981775801e-06	Pik3r6
ENSMUSG00000021728	1127.9982251119	1.22903391458683	1.21841127112119e-06	Emb
ENSMUSG00000037419	1702.1968169482	0.426586049620111	1.37324566749594e-06	Endod1
ENSMUSG00000030946	699.524115408432	0.935413434805183	1.44128197988706e-06	Lhpp
ENSMUSG00000002831	28.4213133929848	2.58001639442733	1.45890253581577e-06	Plin4
ENSMUSG00000004098	94.2345492219305	2.43801554841438	1.65802640435944e-06	Col5a3
ENSMUSG00000046182	11.92179178086	3.66972088257862	1.76495470778264e-06	Gsg1l
ENSMUSG00000028937	232.575990994569	1.04163099511518	1.78637919901284e-06	Acot7
ENSMUSG00000039899	581.809318426931	2.65888625575165	1.79639130361495e-06	Fgl2
ENSMUSG00000011118	109.601455769085	3.2941317096407	2.11328381912666e-06	Panx3
ENSMUSG00000040732	19.1061590293282	4.81671210109581	2.16144802772393e-06	Erg
ENSMUSG00000041482	18.0334224120737	3.36358538682001	2.19809959907879e-06	Piezo2
ENSMUSG00000031503	530.943326233105	1.24897316385498	2.50079530430758e-06	Col4a2
ENSMUSG00000004110	78.1755221188571	1.84743193824599	2.78030607730197e-06	Cacna1e
ENSMUSG00000046470	21.1146565382274	3.5924465040845	2.79056769240688e-06	Sox18
ENSMUSG00000025969	860.424759577261	1.04669682958685	2.87233369702463e-06	Nrp2
ENSMUSG00000046314	19.9379439376476	3.03728639817177	2.88456535870623e-06	Stxbp6
ENSMUSG00000030272	105.945640439266	1.61074797340255	2.94504924206641e-06	Camk1
ENSMUSG00000024981	8211.86602387364	0.261014737141707	2.96797064006852e-06	Acsl5
ENSMUSG00000017466	784.065930461153	1.40837216799957	3.11288950325734e-06	Timp2
ENSMUSG00000033278	26.8735954639191	2.45473647423896	3.17953277993025e-06	Ptprm
ENSMUSG00000048332	68.9859681392398	2.19534705350911	3.28588675102923e-06	Lhfp
ENSMUSG00000069516	753.533842411666	4.42750056324364	3.37683240373322e-06	Lyz2
ENSMUSG00000044626	147.854835939339	0.923908923701699	3.66035715363268e-06	Liph
ENSMUSG00000044017	82.5286306794305	2.4873048152814	3.66770016255579e-06	Adgrd1
ENSMUSG00000041731	22.6012012146635	2.63101833879768	4.04263098290012e-06	Pgm5
ENSMUSG00000024529	109.633377206401	3.77834381657876	4.20081587905443e-06	Lox
ENSMUSG00000042254	53.7048028196159	2.33542262366328	4.33313152969366e-06	Cilp
ENSMUSG00000048960	17.1621084822978	3.56518973466388	4.48706551807065e-06	Prex2
ENSMUSG00000027074	85.3461244527155	2.19998381973462	4.48706551807065e-06	Slc43a3
ENSMUSG00000060560	128.5252518433	1.69432011305498	4.5380965822835e-06	Ces4a
ENSMUSG00000039349	26.8990744754364	2.79121222680609	4.8145602168157e-06	C130074G19Rik
ENSMUSG00000024620	46.0167629925821	3.18841923640113	5.18668408461343e-06	Pdgfrb
ENSMUSG00000050071	23.23128151781	2.01917837023899	5.44500099004381e-06	Bex1
ENSMUSG00000022489	138.173568564729	1.53886061902701	5.54449281286865e-06	Pde1b
ENSMUSG00000033083	956.692750198762	0.855760139994835	5.78432489771887e-06	Tbc1d4
ENSMUSG00000038456	23.019180269829	2.56649704867726	6.1267470379328e-06	Dennd2a
ENSMUSG00000027848	52.4051871714001	2.32908105077115	6.28627201970006e-06	Olfml3
ENSMUSG00000112023	1423.59371246232	4.2775534290614	6.3257001015296e-06	Lilr4b
ENSMUSG00000033788	29.8493837509414	3.44515719690917	6.71903148199564e-06	Dysf
ENSMUSG00000008734	62.7305586938564	1.60572697071842	6.87490975479951e-06	Gprc5b
ENSMUSG00000073940	318.630619123778	6.33929465227504	7.443641953636e-06	Hbb-bt
ENSMUSG00000038754	254.952505242002	2.76092910851096	7.58789604149556e-06	Elovl3
ENSMUSG00000052305	4079.93751579045	6.11856584899177	7.61202447756904e-06	Hbb-b1
ENSMUSG00000006403	59.2064003677057	2.86811989468993	7.93574929155066e-06	Adamts4
ENSMUSG00000069763	20.1224445448031	5.89927888727243	8.27389962274168e-06	Tmem100
ENSMUSG00000027188	17.4212036161803	5.85213262953315	8.34953769290478e-06	Pamr1
ENSMUSG00000027380	354.546086245513	3.1871911753287	8.34953769290478e-06	Acoxl
ENSMUSG00000036144	8.62474132041327	6.02514922998485	8.34953769290478e-06	Meox2
ENSMUSG00000034981	249.153670588702	1.63845256837358	9.3176960283088e-06	Parm1
ENSMUSG00000022240	153.702643450114	1.24426563966489	9.55626512730029e-06	Ctnnd2
ENSMUSG00000037649	321.824123610281	1.20492215780182	1.04716018303061e-05	H2-DMa
ENSMUSG00000071042	21.5254322965178	3.13930386598749	1.05886055634421e-05	Rasgrp3
ENSMUSG00000020681	166.187046898351	1.64124221556423	1.0600092668518e-05	Ace
ENSMUSG00000059149	21.3575937279619	2.09057674142234	1.07113279631278e-05	Mfsd4a
ENSMUSG00000028883	58.8886965401191	4.3957591634997	1.07113279631278e-05	Sema3a
ENSMUSG00000029231	220.572549138659	3.00388472103104	1.08020172340852e-05	Pdgfra
ENSMUSG00000000876	946.048630695478	0.602271667615102	1.08340880962896e-05	Pxmp4
ENSMUSG00000020357	173.087070890792	3.94962598048422	1.08340880962896e-05	Flt4
ENSMUSG00000025597	19.9315499260645	3.98090671726313	1.08340880962896e-05	Klhl4
ENSMUSG00000039706	17.220782934877	3.18593429233511	1.17937147509915e-05	Ldb2
ENSMUSG00000027761	739.334279481778	0.812312157996281	1.29766862847933e-05	Aadac
ENSMUSG00000031936	220.733349085817	1.32221750604452	1.30443936009533e-05	Hephl1
ENSMUSG00000040447	125.488694906828	1.65916705061108	1.31979163695876e-05	Spns2
ENSMUSG00000022150	160.561772351753	1.76547503493428	1.38823416783885e-05	Dab2
ENSMUSG00000019929	1882.87584232347	2.24139862406492	1.44192480588209e-05	Dcn
ENSMUSG00000035735	51.0736201411641	1.49429102872466	1.62048108127958e-05	Dagla
ENSMUSG00000036553	96.1916246052143	1.0707696856895	1.7029579032904e-05	Sh3tc1
ENSMUSG00000035093	2950.9446306303	0.559473234184259	1.70570576217771e-05	Secisbp2l
ENSMUSG00000031517	12.5108704092184	3.74930387388387	1.74835579988474e-05	Gpm6a
ENSMUSG00000082932	17.2490401466381	2.48368191973829	1.76861964733216e-05	Cyp2j8
ENSMUSG00000020241	290.726205928085	1.65145256264859	1.88863216217723e-05	Col6a2
ENSMUSG00000022099	30.7312647610753	1.91029974697591	1.88863216217723e-05	Dmtn
ENSMUSG00000070730	1196.87980376138	0.456712009754476	1.93274845481656e-05	Rmdn3
ENSMUSG00000028031	21.2030754475127	3.82585738896665	1.94576613778803e-05	Dkk2
ENSMUSG00000046618	41.5163805106255	1.65253952042973	1.99360090396597e-05	Olfml2a
ENSMUSG00000033849	23.7765116096783	2.56011511203072	2.03753346717889e-05	B3galt2
ENSMUSG00000029373	23.2219806189363	3.34908368687815	2.08551458531834e-05	Pf4
ENSMUSG00000020399	175.517715164494	1.36009855265201	2.11115948123742e-05	Havcr2
ENSMUSG00000031709	142.924486267872	1.23779549967585	2.11155828431366e-05	Tbc1d9
ENSMUSG00000032349	971.046323203113	0.641369152736881	2.14539540272141e-05	Elovl5
ENSMUSG00000053931	1167.0648047161	0.84131311691916	2.16077670221343e-05	Cnn3
ENSMUSG00000037406	27.1476807430005	2.74498059209245	2.24275589624629e-05	Htra4
ENSMUSG00000069515	27.7095083410204	4.7294670088229	2.41229790894644e-05	Lyz1
ENSMUSG00000030865	13.9189561423522	4.05516569052899	2.42963376800219e-05	Chp2
ENSMUSG00000006014	2477.48555566333	4.81250801013266	2.60302761478936e-05	Prg4
ENSMUSG00000008845	29.9833169531995	4.05727119362488	2.60302761478936e-05	Cd163
ENSMUSG00000016256	495.703470402487	1.22625538039064	2.67980767339039e-05	Ctsz
ENSMUSG00000025557	287.366363950617	0.744579993288576	2.67980767339039e-05	Slc15a1
ENSMUSG00000054641	184.432473505383	3.9432186599361	2.81083414415232e-05	Mmrn1
ENSMUSG00000032908	65.4347945365271	1.4402318455972	2.89957262178954e-05	Sgpp2
ENSMUSG00000046805	278.396944324677	4.13948748662019	2.89957262178954e-05	Mpeg1
ENSMUSG00000042485	25.6777533260893	2.46572059143534	3.01977416836765e-05	Mustn1
ENSMUSG00000033910	8.97233370476958	6.25408257917084	3.02670391868303e-05	Gucy1a1
ENSMUSG00000062329	6.65272034056524	6.01485880262914	3.35706457075629e-05	Cytl1
ENSMUSG00000033579	1527.87612877657	3.21551607217018	3.62668720717819e-05	Fa2h
ENSMUSG00000032186	25.6920697766459	2.2661289381842	3.93046131776705e-05	Tmod2
ENSMUSG00000022126	2075.44956656296	6.29011537464289	3.95321283483606e-05	Acod1
ENSMUSG00000020810	107.40559013601	1.43259827927398	3.98687176310943e-05	Cygb
ENSMUSG00000032826	28.12765701507	2.32700459625972	4.589322829681e-05	Ank2
ENSMUSG00000028339	36.9165737969177	2.3439692667515	4.7546257342233e-05	Col15a1
ENSMUSG00000042190	28.7390493773777	3.38159932993797	4.85443962523455e-05	Cmklr1
ENSMUSG00000069917	661.261557784794	5.58218615117212	4.85443962523455e-05	Hba-a2
ENSMUSG00000037095	275.45884041758	5.16247793453504	5.02388246058566e-05	Lrg1
ENSMUSG00000112148	531.542532332708	3.9466805048926	5.09730455491802e-05	Lilrb4a
ENSMUSG00000066441	2094.23531115598	0.524348478143044	5.15494576324768e-05	Rdh11
ENSMUSG00000022504	84.6866126499793	1.33127693804428	5.15494576324768e-05	Ciita
ENSMUSG00000026712	110.512201600859	4.43060276432258	5.31695824840384e-05	Mrc1
ENSMUSG00000017969	138.737273917371	5.90558031817727	5.58096272108857e-05	Ptgis
ENSMUSG00000061397	23946.6632019636	0.725264356635486	5.58096272108857e-05	Krt79
ENSMUSG00000002204	126.483734372845	1.63736322959275	5.93536698933449e-05	Napsa
ENSMUSG00000062515	31.7670354735201	3.41473905088012	6.18295694986219e-05	Fabp4
ENSMUSG00000076609	10.5766368567269	5.81659541946818	6.18295694986219e-05	NA
ENSMUSG00000095128	26.3592264120712	2.24369078820014	6.42197471319558e-05	Gm5709
ENSMUSG00000028476	24.4205262494911	2.30559190908479	6.61780628199639e-05	Reck
ENSMUSG00000002233	168.099494025398	1.50888738376188	6.8831068473643e-05	Rhoc
ENSMUSG00000040118	18.0650462295634	3.99666582071392	6.99909482321948e-05	Cacna2d1
ENSMUSG00000094686	287.513156352123	4.26190542267177	7.025053246506e-05	Ccl21a
ENSMUSG00000052974	71.4097355921943	3.56042535636847	7.025053246506e-05	Cyp2f2
ENSMUSG00000029832	449.019301937184	0.754514102414632	7.15244728857722e-05	Nfe2l3
ENSMUSG00000025555	179.081222793129	1.19289745392473	7.33587734024679e-05	Farp1
ENSMUSG00000009281	24.8833939512477	4.2126059570478	7.36341590473436e-05	Rarres2
ENSMUSG00000022332	18.15844212321	2.87796320667637	7.38887269743346e-05	Khdrbs3
ENSMUSG00000029919	406.098120952601	1.18737032252134	7.87772246259529e-05	Hpgds
ENSMUSG00000019978	660.783851183639	0.787922139446147	7.87772246259529e-05	Epb41l2
ENSMUSG00000079547	237.701015944063	1.09672844489441	7.87772246259529e-05	H2-DMb1
ENSMUSG00000015396	702.56484926248	1.08907333272489	7.91605288074576e-05	Cd83
ENSMUSG00000027187	2561.73677000443	0.584755773110173	7.98200131582063e-05	Cat
ENSMUSG00000047045	1277.84816200534	0.566893978775495	7.98908398756374e-05	Tmem164
ENSMUSG00000032698	48.8669007704772	1.73147932377039	8.21209011486074e-05	Lmo2
ENSMUSG00000041729	31.9757648642025	1.50714764808273	8.5130802458059e-05	Coro2b
ENSMUSG00000052087	76.6716026473289	1.27769953963624	8.74569779952467e-05	Rgs14
ENSMUSG00000103593	1618.42486273271	-1.38790083793257	9.0852238920894e-05	NA
ENSMUSG00000019848	546.739694898831	-0.427708952628469	9.13913272612512e-05	Popdc3
ENSMUSG00000081362	32.7086677293675	2.28087134900143	9.27317937372569e-05	NA
ENSMUSG00000017309	11.3456645785712	5.46316613317615	9.57087867984563e-05	Cd300lg
ENSMUSG00000021943	23.2177966672223	2.86019471484373	9.85922953777636e-05	Gdf10
ENSMUSG00000028538	29.0009132180084	1.49077044062685	0.000108808799114922	St3gal3
ENSMUSG00000063531	88.5853250814511	1.07573074037497	0.000110954994447152	Sema3e
ENSMUSG00000030142	898.840011425599	5.62911167244243	0.000110954994447152	Clec4e
ENSMUSG00000000794	12.5980012368007	3.50024339518156	0.000112316903801924	Kcnn3
ENSMUSG00000025701	281.083696148836	1.46132328889616	0.000112316903801924	Alox5
ENSMUSG00000030638	8.65266263920446	4.39646496981891	0.000112316903801924	Sh3gl3
ENSMUSG00000010797	18.6511880478595	5.40401460588853	0.000115951679741905	Wnt2
ENSMUSG00000001493	17.307854735976	4.29369873808502	0.000116054608466023	Meox1
ENSMUSG00000022901	174.042417089012	1.4541824175098	0.000116054608466023	Cd86
ENSMUSG00000021268	25.0386102495931	5.18480115354963	0.000118137314876741	Meg3
ENSMUSG00000034911	19.613675081001	3.3181340537441	0.000121924005368462	Ushbp1
ENSMUSG00000028459	171.257008445483	1.40834610383695	0.00012202725193261	Cd72
ENSMUSG00000041794	19.3666335845762	1.76084236562262	0.00012202725193261	Myrip
ENSMUSG00000108022	152.026681405182	2.52541696668566	0.00012373856233221	NA
ENSMUSG00000026288	302.36276435095	1.41644525141827	0.000127557315474959	Inpp5d
ENSMUSG00000028717	13.8958420798471	3.13209747992116	0.000127557315474959	Tal1
ENSMUSG00000046916	7.64419133723958	5.88809898823158	0.00012916776969895	Myct1
ENSMUSG00000028100	466.345113386529	0.866305425870998	0.000130016092889339	Nudt17
ENSMUSG00000016756	54.99839992777	2.204304026185	0.000130016092889339	Cmah
ENSMUSG00000061100	10.7861594975698	5.94160245460339	0.000132886276224943	Retnla
ENSMUSG00000020674	131.283404238493	1.76966266009496	0.000134256853185176	Pxdn
ENSMUSG00000021047	11.0481154131842	3.94204119313337	0.000137273807198224	Nova1
ENSMUSG00000027792	49.3972179557212	1.54686598643951	0.000142751352534809	Bche
ENSMUSG00000031283	27.7269410539037	3.90735292941671	0.000143485045414693	Chrdl1
ENSMUSG00000004270	2720.69082672366	0.432917323485306	0.000144095303475123	Lpcat3
ENSMUSG00000026833	109.89142333511	1.09102210172005	0.000144987423775929	Olfm1
ENSMUSG00000042129	84.1931193012253	2.08632707333801	0.000148223543167557	Rassf4
ENSMUSG00000026208	11.2650275421865	6.09297513305433	0.000148254086757698	Des
ENSMUSG00000027978	326.298461138525	1.42430244497903	0.000148254086757698	Prss12
ENSMUSG00000039109	140.081094925258	5.34257971859883	0.000148254086757698	F13a1
ENSMUSG00000032925	17.7183031138327	4.352166399093	0.000152439013724072	Itgbl1
ENSMUSG00000032625	11.6004600700504	4.04501292503811	0.000156683552360266	Thsd7a
ENSMUSG00000024610	8457.90310344534	1.26608977344493	0.000161057506082562	Cd74
ENSMUSG00000045954	109.753951608155	2.6139338404514	0.000161368924367321	Cavin2
ENSMUSG00000028111	71.3712686311858	1.96361012103906	0.00016228363057725	Ctsk
ENSMUSG00000040650	22.3941629567291	1.81692872836586	0.000169139052605993	Cyp2b23
ENSMUSG00000034591	48.7599278084447	1.61865534293784	0.000169777602070647	Slc41a2
ENSMUSG00000055541	15.380083532029	3.11778470272817	0.000173426495669039	Lair1
ENSMUSG00000022665	227.649613741824	1.22020801488649	0.000173497646582933	Ccdc80
ENSMUSG00000072949	652.849485785199	0.699295519636681	0.000177261897217736	Acot1
ENSMUSG00000040061	82.2032278538917	1.26535855156694	0.000180566127647273	Plcb2
ENSMUSG00000035711	136.272823276437	1.38893936675912	0.000180566127647273	Dok3
ENSMUSG00000044405	14.390582247469	2.2347676957156	0.000186499606768628	Adig
ENSMUSG00000031530	213.187403072327	0.888194612079762	0.000189442057492511	Dusp4
ENSMUSG00000063430	26.5856915338149	2.1381782043733	0.000191237016085218	Wscd2
ENSMUSG00000033610	739.746216893845	0.511153398717354	0.000191664530013399	Pank1
ENSMUSG00000027559	15.7884947797283	6.05964562143473	0.00019594309385593	Car3
ENSMUSG00000002504	51.0850048270326	1.76232662335726	0.000197446221028919	Slc9a3r2
ENSMUSG00000032915	12.0046367554484	4.56488747908053	0.000201819075848225	Adgre4
ENSMUSG00000036594	3516.19081785707	1.29843691059997	0.00021623684389834	H2-Aa
ENSMUSG00000034258	16.3073600596125	1.87565347966727	0.00021872744880265	Flvcr2
ENSMUSG00000022438	40.9308488759262	2.51825381272178	0.000218780896922271	Parvb
ENSMUSG00000038147	96.940803558568	1.44395783929872	0.000229393223220538	Cd84
ENSMUSG00000034041	13.5617376778557	4.60072018552828	0.000229393223220538	Lyl1
ENSMUSG00000024998	27.4859405459233	2.38477435266713	0.000231784121988899	Plce1
ENSMUSG00000102758	77.106818110317	1.03419020876439	0.000236252619699797	Naaladl2
ENSMUSG00000021702	299.542972648758	3.27284916683498	0.00023637498361607	Thbs4
ENSMUSG00000025889	17.7035256646962	5.39761160799292	0.000237810306866496	Snca
ENSMUSG00000026580	106.369181737927	4.0726995313039	0.000242106877674283	Selp
ENSMUSG00000015340	98.6042663826251	5.76531217021348	0.000242106877674283	Cybb
ENSMUSG00000034037	62.2811630853768	1.83172432807337	0.00024702643582639	Fgd5
ENSMUSG00000001240	69.354474619039	1.45681115265673	0.000252246338797872	Ramp2
ENSMUSG00000022799	150.60429155954	1.21453076857257	0.000253829940850805	Arhgap31
ENSMUSG00000031486	92.4421728154792	2.89918149875258	0.000255155406773567	Adgra2
ENSMUSG00000029669	7.71543176608961	5.15738354786639	0.000261440152342435	Tspan12
ENSMUSG00000027339	93.8901863867372	1.45254898247088	0.000263841869108444	Rassf2
ENSMUSG00000073599	173.7956298193	1.81307648841955	0.000269277655925867	Ecscr
ENSMUSG00000022456	69.2089875611887	1.45624792565111	0.000275150539558756	2003-09-01
ENSMUSG00000031216	18.97088180933	1.89903671454903	0.000284315328297178	Stard8
ENSMUSG00000025347	33.2950139905028	2.94747185198338	0.000289689594544055	Mettl7b
ENSMUSG00000069633	136.919628748259	0.714959104506394	0.00029005747989303	Pex11g
ENSMUSG00000001930	65.6746657852827	1.55651219900764	0.000293262898057847	Vwf
ENSMUSG00000019539	39.5281677996077	1.94868093698098	0.000302852862531009	Rcn3
ENSMUSG00000030246	489.402518472703	0.918831432272056	0.00030427560635832	Ldhb
ENSMUSG00000069248	39.0411411488275	2.15291308623137	0.000311490128047399	Serpinb6e
ENSMUSG00000039883	5.03222456759532	5.24449862082817	0.000314676490878152	Lrrc17
ENSMUSG00000045333	17.9544663575754	3.66550275540828	0.000315001726174468	Zfp423
ENSMUSG00000060206	48.892473677836	1.42025974610891	0.000316880480660199	Zfp462
ENSMUSG00000057722	13.9216992252933	2.86858373101101	0.000323374058635281	Lepr
ENSMUSG00000000290	351.976961990091	1.61405692739929	0.000336892494850672	Itgb2
ENSMUSG00000018819	534.501602698445	1.37340314780933	0.0003417662711641	Lsp1
ENSMUSG00000010651	37.3566626354379	2.33790200904221	0.000346487244090821	Acaa1b
ENSMUSG00000078505	8.04290850307925	3.71999688651585	0.000346691100485758	Aadacl4fm4
ENSMUSG00000025978	12.3856108032963	2.81902457848106	0.000351654017905483	Rftn2
ENSMUSG00000043727	22.8473284490986	3.14072985178231	0.000359599385251786	F830045P16Rik
ENSMUSG00000033825	22.1530527119539	5.25796039302305	0.000369313774452823	Tpsb2
ENSMUSG00000041559	137.017077571737	3.25235354601124	0.000376207823605063	Fmod
ENSMUSG00000029765	14.6049538916943	3.04553015778744	0.000390126958363259	Plxna4
ENSMUSG00000031506	59.5687092839218	1.29692802361894	0.000404375709349204	Ptpn7
ENSMUSG00000037872	36.2233070734655	3.34358011258981	0.000408139448559746	Ackr1
ENSMUSG00000020573	57.912658465234	1.31055649655099	0.000408139448559746	Pik3cg
ENSMUSG00000017652	71.3509594032563	1.54506475166609	0.00041140305055745	Cd40
ENSMUSG00000039943	52.9198781166497	1.28675586525507	0.000414125571715256	Plcb4
ENSMUSG00000048387	11.9163720857248	5.17552454089368	0.000414125571715256	Osr1
ENSMUSG00000041957	41.0316192278311	1.52200797633776	0.000414125571715256	Pkp2
ENSMUSG00000036036	24.0197796540829	1.54574687856938	0.000424412904914936	Zfp57
ENSMUSG00000040212	253.433690392846	1.06078650296219	0.00043092980614012	Emp3
ENSMUSG00000027208	14.2753567772052	2.98772058170886	0.000439067711989199	Fgf7
ENSMUSG00000074793	17.1697596821188	2.30724928774546	0.000445651251117313	Hspa12b
ENSMUSG00000029322	100.308296741475	5.69799403422605	0.000451182607767208	Plac8
ENSMUSG00000027360	1240.1086272738	4.16009902647783	0.000463952590002342	Hdc
ENSMUSG00000032725	11.5064519129576	3.84851385779399	0.000476934793271246	Folr2
ENSMUSG00000000531	940.651456868387	1.00870527307806	0.000491926474185315	Grasp
ENSMUSG00000022048	86.0363949788558	1.36420768803106	0.000497916563357493	Dpysl2
ENSMUSG00000087364	16.7512666900032	2.62194800498304	0.000508751149783383	NA
ENSMUSG00000048621	56.5732154407666	1.7848278835517	0.000528966875705666	Gm6377
ENSMUSG00000047562	27.1807782837827	-2.67912182996206	0.000538779023646279	Mmp10
ENSMUSG00000026728	4960.6314396174	1.52435096839278	0.000540535578951921	Vim
ENSMUSG00000062464	78.6171352928798	1.27556282292875	0.000542641651116474	Cyp4f37
ENSMUSG00000037548	94.1064081887682	1.49914703817013	0.000542641651116474	H2-DMb2
ENSMUSG00000041828	5.56544434270853	5.21982804766042	0.000542923929293312	Abca8a
ENSMUSG00000002578	471.00572595597	-0.838257914318107	0.000553382492945819	Ikzf4
ENSMUSG00000040950	22.4368027778846	3.27902591129417	0.000560713034386817	Mgl2
ENSMUSG00000032690	189.347421934796	2.50261723205107	0.000569340284997992	Oas2
ENSMUSG00000030399	28.099854650465	3.11001046017633	0.000578696425809208	Ckm
ENSMUSG00000073490	172.504545173091	1.82587464072961	0.000604274129119554	Ifi207
ENSMUSG00000053475	81.0807809111812	1.81552804692404	0.000607532451615185	Tnfaip6
ENSMUSG00000026832	597.725520800567	1.00998251934549	0.00061730306426416	Cytip
ENSMUSG00000026749	205.994264523699	0.847488453939205	0.000619827369068156	Nek6
ENSMUSG00000071656	82.3823245516519	1.21517661691026	0.000651598922414634	Lrrn4cl
ENSMUSG00000034783	1105.65206221756	1.6103536246394	0.000653742809390931	Cd207
ENSMUSG00000031289	31.0036934517414	1.75936511256335	0.000679963290381363	Il13ra2
ENSMUSG00000028766	25.9648431548516	1.86811364910607	0.000718667571849336	Alpl
ENSMUSG00000061068	47.565538902653	4.42710087562593	0.00072763137956491	Mcpt4
ENSMUSG00000075284	188.355947096044	1.45168673699307	0.000729218223611731	Wipf1
ENSMUSG00000008496	14.0345334628536	3.04018223381172	0.000729218223611731	Pou2f2
ENSMUSG00000031844	24.5466280651314	1.70033819616873	0.000729218223611731	Hsd17b2
ENSMUSG00000030551	72.4112524012342	1.10967173103212	0.000735632367876041	Nr2f2
ENSMUSG00000022225	38.0760792884311	4.30715913146973	0.000759627691716454	Cma1
ENSMUSG00000030935	10.633214553928	2.29917636786648	0.000766379771427761	Acsm3
ENSMUSG00000001865	11.8260637612107	5.31751814418514	0.000767679891775914	Cpa3
ENSMUSG00000019278	17.5450240117491	2.95510324450196	0.000767679891775914	Dpep1
ENSMUSG00000068220	361.872798456791	1.27492936824203	0.000767679891775914	Lgals1
ENSMUSG00000019843	196.974377117371	1.02745577280277	0.000769921364413906	Fyn
ENSMUSG00000028132	214.950478074512	1.20448882006193	0.000778191456039279	Tmem56
ENSMUSG00000029657	4921.75564244114	-1.15463591022589	0.00078119452710756	Hsph1
ENSMUSG00000031253	9.13580842954123	4.80598624561765	0.000804002298157093	Srpx2
ENSMUSG00000038193	6.48931307742842	5.0574282759174	0.000807985272175456	Hand2
ENSMUSG00000096257	158.782037047632	1.35121664725407	0.000839887505870866	Ccer2
ENSMUSG00000039934	65.9393046080499	1.54565478244666	0.000840356366974921	Gsap
ENSMUSG00000027698	149.38381557881	1.30653908540121	0.00084834967100894	Nceh1
ENSMUSG00000001227	33.926216683862	2.6513045696125	0.000865012731208027	Sema6b
ENSMUSG00000027500	21.760236075744	2.99519671258823	0.000935021663952205	Stmn2
ENSMUSG00000003882	232.213997112266	1.08751223938634	0.000935021663952205	Il7r
ENSMUSG00000108218	8.01392108762336	3.38466274159648	0.000966981023772608	NA
ENSMUSG00000033705	66.3816942003297	1.08221065794439	0.000972221421695933	Stard9
ENSMUSG00000059412	19.0955883362331	2.05224647696285	0.00100270063141917	Fxyd2
ENSMUSG00000026980	144.443145537479	1.12207970687796	0.00101868653327175	Ly75
ENSMUSG00000054435	13.1572020780883	3.2347069143501	0.00102317379749568	Gimap4
ENSMUSG00000050022	73.8503445277572	1.08898565062678	0.00103004201665157	Amz1
ENSMUSG00000015355	38.5820556825534	1.59736836308195	0.00103358392662667	Cd48
ENSMUSG00000054203	75.8733459665381	3.38744442677683	0.00103358392662667	Ifi205
ENSMUSG00000022836	63.9997427073821	1.28075967721654	0.00104539170729812	Mylk
ENSMUSG00000026656	242.851840227436	1.26471013086271	0.00104862976659138	Fcgr2b
ENSMUSG00000022330	17.4308552599617	2.538143001715	0.00104862976659138	Osr2
ENSMUSG00000006782	68.2511614344211	0.86603687654321	0.00107781037081857	Cnp
ENSMUSG00000028978	85.7475796552622	1.54484886448209	0.0011059137107669	Nos3
ENSMUSG00000028581	914.34945381686	1.24973512319052	0.00111215633489344	Laptm5
ENSMUSG00000061723	29.4296674287104	4.5815105910923	0.00114518621530706	Tnnt3
ENSMUSG00000019122	182.748557491496	4.80747774216482	0.00116065727234295	Ccl9
ENSMUSG00000051236	220.260945352614	0.842324636742202	0.00116123928178443	Msrb3
ENSMUSG00000000693	28.4026162964349	2.80939122700854	0.00118917446170708	Loxl3
ENSMUSG00000018339	113.386120815196	4.09388214401361	0.00121371387495055	Gpx3
ENSMUSG00000035799	42.7777350388257	1.81175683665876	0.00121626134963985	Twist1
ENSMUSG00000003051	892.763753213297	-1.05228001477517	0.00123348351091683	Elf3
ENSMUSG00000000392	18.0296797896828	2.40074389257638	0.00124411353700402	Fap
ENSMUSG00000075254	205.816867844452	0.8301486942705	0.0012503054984891	Heg1
ENSMUSG00000053702	858.599013431562	0.533381703305644	0.00125934092233104	Nebl
ENSMUSG00000031778	1549.11920692327	-0.397978909692489	0.00126803385115069	Cx3cl1
ENSMUSG00000029576	11.7715630739626	2.63761352647492	0.00127041733578284	Radil
ENSMUSG00000020486	7.35304407202681	3.05708999795285	0.00128412504028483	2004-09-01
ENSMUSG00000054720	56.3266548291711	1.54976534864657	0.00130732224068537	Lrrc8c
ENSMUSG00000019577	866.821184720327	1.51110420219347	0.00131251002281998	Pdk4
ENSMUSG00000020788	180.972012846618	1.3477182444551	0.00131251002281998	Atp2a3
ENSMUSG00000017300	19.63453789723	3.26394993213185	0.00133130008044318	Tnnc2
ENSMUSG00000035504	345.518846526293	0.605912304915843	0.00133130008044318	Reep6
ENSMUSG00000030218	278.29281011902	1.09503905109166	0.00138687859691751	Mgp
ENSMUSG00000030468	13.785372436409	5.33902603894565	0.00138787479849817	Siglecg
ENSMUSG00000056025	161.018740141639	1.15969555035782	0.00141314797055982	Clca3a1
ENSMUSG00000024986	26.8113574518643	1.43039917529755	0.00144333667111826	Hhex
ENSMUSG00000071715	171.578352272137	1.39361536917699	0.00145192638145404	Ncf4
ENSMUSG00000053907	9091.05513935868	-0.451538857605187	0.0014685774293944	Mat2a
ENSMUSG00000073421	3939.13138333473	1.44461109808804	0.00148055166804109	H2-Ab1
ENSMUSG00000060675	210.515684711269	1.02903019396225	0.00148055166804109	Plaat3
ENSMUSG00000086578	4.19459782314773	5.16062058196798	0.00150672360217693	NA
ENSMUSG00000020901	289.054621707228	1.22044703917988	0.00150672360217693	Pik3r5
ENSMUSG00000024168	11.0182351129398	3.23648048265845	0.00152902537534546	Tmem204
ENSMUSG00000044906	33.5238526136597	1.53521196832679	0.00152902537534546	4930503L19Rik
ENSMUSG00000028005	10.5126261822642	2.59504290619141	0.00153767536880134	Gucy1b1
ENSMUSG00000039316	43.1810342032331	1.73797262421565	0.00153767536880134	Rftn1
ENSMUSG00000024544	445.676887197778	-0.490052443972812	0.00153767536880134	Ldlrad4
ENSMUSG00000040552	34.0836860824973	2.56397943448462	0.00154487811664569	C3ar1
ENSMUSG00000042540	22.6669824004844	2.27914039459304	0.00156451575679042	Acot5
ENSMUSG00000071714	417.096443408649	1.16934919998365	0.00156451575679042	Csf2rb2
ENSMUSG00000026069	352.440098697619	3.4512270008275	0.00158047442000229	Il1rl1
ENSMUSG00000089715	98.1269273390052	0.931161206151313	0.00158587977795654	Cbx6
ENSMUSG00000057672	175.702474637697	1.22525084826493	0.00160196874227165	Pkn1
ENSMUSG00000061132	490.514984254351	0.589634129262377	0.00161720155749983	Blnk
ENSMUSG00000038677	27.0126727096183	2.14935751048659	0.00162013661687763	Scube3
ENSMUSG00000023992	7.90478818389427	4.72708246422807	0.00162013661687763	Trem2
ENSMUSG00000029163	34.5388274681596	1.47358533658107	0.00162225070191076	Emilin1
ENSMUSG00000062980	44.2098079558857	1.03529100018678	0.0016326891381973	Cped1
ENSMUSG00000038217	249.698385663454	0.683566810444863	0.00163630389608122	Tlcd2
ENSMUSG00000034675	63.9685918338973	1.57774432263029	0.00164016063514735	Dbn1
ENSMUSG00000096917	203.842229634981	-0.574010910707879	0.00164192221675625	2500002B13Rik
ENSMUSG00000053675	498.318908903191	0.609668818862822	0.00167252241743084	Tgm5
ENSMUSG00000030513	827.271990006682	0.711849012227597	0.00167523450638406	Pcsk6
ENSMUSG00000020312	16.0034408643981	4.54606372856363	0.00167799094126254	Shc2
ENSMUSG00000039007	21.2742286488875	1.90937661953263	0.00169781744901853	Cpq
ENSMUSG00000052921	39.264313403582	1.6220634008821	0.00170120880260696	Arhgef15
ENSMUSG00000020473	440.200435371253	0.818804937522241	0.00174663523116065	Aebp1
ENSMUSG00000038811	54.2601422435936	1.37891201649908	0.00190545413709168	Gngt2
ENSMUSG00000038936	241.733584812623	0.597525251450824	0.00195286283336454	Sccpdh
ENSMUSG00000060586	3415.69519520491	1.39942027580352	0.00196360906696177	H2-Eb1
ENSMUSG00000021207	69.383592902879	1.50776988413704	0.0019898727882562	Akr1c21
ENSMUSG00000073755	217.344124692963	0.619609756965064	0.002069149902416	5730409E04Rik
ENSMUSG00000034738	12.4719020770536	1.75284349811665	0.00213763997212258	Nostrin
ENSMUSG00000061751	243.079222274079	0.473588365491244	0.00215396190647581	Kalrn
ENSMUSG00000024238	183.769568063781	1.05094758097593	0.00225892391214846	Zeb1
ENSMUSG00000020900	23.4327141658946	1.35519080831734	0.00228895026708746	Myh10
ENSMUSG00000025283	21199.7409388715	-0.475189186053278	0.00231649073695337	Sat1
ENSMUSG00000057182	27.0004807571824	1.68777303220114	0.00233611971271468	Scn3a
ENSMUSG00000056427	239.389690611879	0.916166838887133	0.00234822591904147	Slit3
ENSMUSG00000033107	48.2938565481021	1.44100911303267	0.00235057531928062	Rnf125
ENSMUSG00000026610	3.82389686654605	4.93170168390462	0.00236138955340799	Esrrg
ENSMUSG00000089789	449.462607442718	0.987751278135042	0.00238985515695714	Rdh1
ENSMUSG00000027797	69.3603102879939	1.45878170854683	0.00240785079072242	Dclk1
ENSMUSG00000030223	50.1328680888758	1.48393045465225	0.00240785079072242	Ptpro
ENSMUSG00000041536	7.15861891605044	2.64778409308896	0.00240785079072242	Serpina3a
ENSMUSG00000045975	1615.28142654038	0.475039830108042	0.00240785079072242	C2cd2
ENSMUSG00000030789	199.831461751489	1.42190682728036	0.00242738215836298	Itgax
ENSMUSG00000064267	96.9747987881755	1.14312354072841	0.00246521063293752	Hvcn1
ENSMUSG00000032118	12.3202176348701	2.41862420864073	0.00249867080467768	Fez1
ENSMUSG00000039167	6.29915272213761	4.65366581276121	0.0025054458665202	Adgrl4
ENSMUSG00000032181	13.369413677627	4.51813072596162	0.0025054458665202	Scg3
ENSMUSG00000089960	640.320392725472	0.798882865486787	0.00254227051509036	Ugt1a1
ENSMUSG00000020111	1609.22772984562	0.282952877319275	0.00255142209952405	Micu1
ENSMUSG00000053062	9.8546212699309	4.59306904445508	0.00265495572373401	Jam2
ENSMUSG00000057614	4990.53356412667	-0.328870900255912	0.00270093485163598	Gnai1
ENSMUSG00000024621	872.796085380664	1.18226340360783	0.00271745257833293	Csf1r
ENSMUSG00000017737	345.350562903525	1.8097921482737	0.00274405972292918	Mmp9
ENSMUSG00000008035	1495.53305439682	0.309461496941795	0.00279881958400811	Mid1ip1
ENSMUSG00000037820	694.355153079558	2.65859069079791	0.00281565316840439	Tgm2
ENSMUSG00000030917	863.383950961714	0.489370769670517	0.00284537300954622	Tmem159
ENSMUSG00000074272	31.8350782658049	2.72143338821583	0.00286734058495699	Ceacam1
ENSMUSG00000026872	198.965439986657	2.7079757426871	0.00291154481793187	Zeb2
ENSMUSG00000019989	21.178932542642	1.7836446765373	0.00295471639327054	Enpp3
ENSMUSG00000022534	180.007654432507	5.76651676795659	0.00300759194323248	Mefv
ENSMUSG00000044968	89.572567668392	0.749032771093188	0.00302078208647378	Napepld
ENSMUSG00000025044	73.879334614418	4.93735573261277	0.00309501650044537	Msr1
ENSMUSG00000022439	48.6533693483486	1.46515589249398	0.00313218433856335	Parvg
ENSMUSG00000078670	75.2856326286782	1.30204999305998	0.00315878114016455	Fam174b
ENSMUSG00000014329	48.180777755035	1.66981681532339	0.00315878114016455	Bicc1
ENSMUSG00000022053	5.91674552875484	4.58866580223503	0.00315878114016455	Ebf2
ENSMUSG00000030249	3.74017467474472	4.89037923655419	0.00317166663637568	Abcc9
ENSMUSG00000058427	1823.43686361314	1.64136714966503	0.003184564868148	Cxcl2
ENSMUSG00000003746	724.083382112071	0.587556890479016	0.00323460565023169	Man1a
ENSMUSG00000035376	3288.64859829445	0.297969729225125	0.0032968296656512	Hacd2
ENSMUSG00000027799	42.5140845680916	1.01346918392252	0.00330283297563413	Nbea
ENSMUSG00000025911	13.5428309279991	1.77379675669452	0.00335197205435086	Adhfe1
ENSMUSG00000009687	700.365549012616	1.18860118422859	0.00344108547655862	Fxyd5
ENSMUSG00000021708	6.33414774731202	2.81486601554931	0.00344567489892982	Rasgrf2
ENSMUSG00000071019	2684.36915428982	0.672945519651752	0.00345345357980142	Sdr16c6
ENSMUSG00000024679	106.349974481773	1.86120332333521	0.00347138443727426	Ms4a6d
ENSMUSG00000020620	3.89770119142463	4.67945381576129	0.00355228637753421	Abca8b
ENSMUSG00000006777	99.6747630114093	1.50396126300097	0.00359738667375615	Krt23
ENSMUSG00000043004	92.5319111999381	1.36261929259851	0.00362734002470163	Gng2
ENSMUSG00000011256	101.376632712147	1.26791161544742	0.00364500257423892	Adam19
ENSMUSG00000060594	21.0703088820528	4.44734848718909	0.00369445408861587	Layn
ENSMUSG00000024084	28.8152644200446	1.38656515061813	0.00374716145031914	Qpct
ENSMUSG00000004730	84.6508064869759	1.3689426575998	0.00375642729791094	Adgre1
ENSMUSG00000030798	118.133883235729	1.10504997497739	0.00381870502403572	Cd37
ENSMUSG00000057969	19.7539766566363	1.30987233664895	0.00384154628478687	Sema3b
ENSMUSG00000037710	922.667708644345	0.471444892728664	0.00384154628478687	Cisd1
ENSMUSG00000030278	10.9153095213882	2.24927045578995	0.00399525033786285	Cidec
ENSMUSG00000053063	8.98060165963169	4.66779071167632	0.00399525033786285	Clec12a
ENSMUSG00000074625	239.862816261517	0.973618451517833	0.0040115685260942	Arhgap40
ENSMUSG00000018893	20.2282961477481	3.25057403823698	0.00403880776437876	Mb
ENSMUSG00000029761	746.194720516003	0.880621162527912	0.00410294067823325	Cald1
ENSMUSG00000064262	11.251084641558	2.71918692612951	0.00410394105519379	Gimap8
ENSMUSG00000008206	5198.30727789913	0.687887779224989	0.00410394105519379	Cers4
ENSMUSG00000029915	66.4147171038852	2.61805090748134	0.00410806141348999	Clec5a
ENSMUSG00000027398	2246.22175134212	2.75144427403568	0.00418245159143657	Il1b
ENSMUSG00000044749	6.14288495012864	2.73121018915312	0.00431974077930786	Abca6
ENSMUSG00000041287	610.294652960754	-0.495460845295787	0.00434091139455857	Sox15
ENSMUSG00000028369	28.9218136090458	2.33083576721602	0.00435504030369874	Svep1
ENSMUSG00000054404	180.796833219529	2.10331653154311	0.00440808533755476	Slfn5
ENSMUSG00000108366	53.3177242155295	-0.876666130499597	0.00444100256811221	NA
ENSMUSG00000026825	73.2642480819586	1.127926650109	0.00444817830662944	Dnm1
ENSMUSG00000005483	18380.206345188	-0.801254603942352	0.00444817830662944	Dnajb1
ENSMUSG00000015468	24.4954287252297	1.46521343041267	0.0044883097365862	Notch4
ENSMUSG00000002847	8.53653694550689	4.80718687554119	0.00454234557072897	Pla1a
ENSMUSG00000025429	129.901094935937	0.787246137772713	0.00454234557072897	Pstpip2
ENSMUSG00000021798	37.0236029842045	1.10324743990317	0.00466474757719281	Ldb3
ENSMUSG00000029503	63.8666403486705	1.60760560823732	0.00468162846392949	P2rx2
ENSMUSG00000024076	19.0709748305708	2.11938571603233	0.00477871667425195	Vit
ENSMUSG00000040612	9.57633251204457	3.2018355229675	0.00480309585991466	Ildr2
ENSMUSG00000038663	9.05709256608103	2.60639644633253	0.00484909324273902	Fsd2
ENSMUSG00000035407	13.9124953063204	2.06808150728508	0.00493403666674591	Kank4
ENSMUSG00000024451	183.348237483228	1.20932229827271	0.00493403666674591	Arap3
ENSMUSG00000002475	29.9310747241168	1.033524909291	0.00496264258708126	Abhd3
ENSMUSG00000021130	19.6333857791779	2.72914445108827	0.0049771395612601	Galnt16
ENSMUSG00000045658	78.2587014284419	1.36095265911917	0.00498018597086694	Pid1
ENSMUSG00000043068	680.226351067337	0.568316371304503	0.0049894595215003	Fam89a
ENSMUSG00000031375	489.811927516678	1.80798062911444	0.00500867761796602	Bgn
ENSMUSG00000022372	47.8321304395999	1.83220926040495	0.00513488750383912	Sla
ENSMUSG00000031239	16.8744425349939	2.06425436923631	0.00519451562179764	Itm2a
ENSMUSG00000033880	262.166387069983	1.13069250145251	0.00523244317748592	Lgals3bp
ENSMUSG00000001131	418.534230537141	1.90958742730913	0.00523244317748592	Timp1
ENSMUSG00000020377	78.8606643994394	1.12509046670051	0.00527091756237623	Ltc4s
ENSMUSG00000028211	2515.17722880477	-0.38649306152583	0.00527214820995401	Trp53inp1
ENSMUSG00000032596	120.633725345587	1.66666075456817	0.00527214820995401	Uba7
ENSMUSG00000026786	153.832089317929	1.37722625292462	0.00527921687064386	Apbb1ip
ENSMUSG00000097451	10.8835573974171	4.44742470131256	0.00528602528995232	NA
ENSMUSG00000022651	84.0805009289535	5.29706767899169	0.00536654086926541	Retnlg
ENSMUSG00000006221	8.70552721183947	4.87268755978844	0.00558616303280583	Hspb7
ENSMUSG00000009394	16.7042490243488	1.9340812863512	0.00558616303280583	Syn2
ENSMUSG00000046280	22.8114774881064	2.12295477364991	0.00559170459587286	She
ENSMUSG00000085403	102.491278913262	-1.61651650077137	0.00559170459587286	NA
ENSMUSG00000038264	88.7844113878072	1.18361883836051	0.0056033831058258	Sema7a
ENSMUSG00000031586	66.0922071137429	1.11953478772514	0.0056599003764723	Rbpms
ENSMUSG00000022793	46.5035433383425	0.917735645303041	0.0056599003764723	B4galt4
ENSMUSG00000040345	118.283491007704	1.28291960340726	0.00568395489780953	Arhgap9
ENSMUSG00000026358	2094.39114590296	0.959939657687163	0.00568908074515577	Rgs1
ENSMUSG00000032232	281.551689090822	1.1129400779097	0.00574647326196907	Cgnl1
ENSMUSG00000056978	12.7973929815772	2.29122961780608	0.00575582787888631	Hamp2
ENSMUSG00000023274	12.9103669320583	1.94208800160229	0.0057574421804612	Cd4
ENSMUSG00000000440	123.541312749308	2.34711556011205	0.00587474494987004	Pparg
ENSMUSG00000046337	192.88526846148	-0.43141123959026	0.00590646635506663	Fam178b
ENSMUSG00000042436	14.5693728085758	3.69110197443207	0.00594895016205417	Mfap4
ENSMUSG00000024459	55.5492028623856	1.5893470484251	0.00618806159906248	H2-M5
ENSMUSG00000031662	212.502965246314	1.81485919356159	0.00622112072341782	Snx20
ENSMUSG00000026177	247.32091098505	3.29694954325775	0.00627361153703883	Slc11a1
ENSMUSG00000032418	3826.61481644594	0.561189434941974	0.00637486624366181	Me1
ENSMUSG00000034164	13.1745049734495	2.72827113769761	0.00637486624366181	Emid1
ENSMUSG00000037685	482.967357696434	0.433249443417578	0.00641923959510785	Atp8a1
ENSMUSG00000041440	926.689476652779	0.48819684291074	0.00650134433516395	Gk5
ENSMUSG00000040537	9.42317970931275	2.2104981152444	0.0065068049354131	Adam22
ENSMUSG00000062542	29.3513017178459	1.20246627918196	0.00653221579065272	Syt9
ENSMUSG00000013846	548.178234347438	0.864053815415195	0.00653221579065272	St3gal1
ENSMUSG00000032243	6.08641132642176	2.5689880302714	0.00658148829446136	Itga11
ENSMUSG00000112794	48.0071930327542	1.82486183343871	0.00663039174209351	NA
ENSMUSG00000078190	5.95983909630093	4.67528344169612	0.00677620606856823	Dnm3os
ENSMUSG00000021270	17846.0786777648	-0.758405179321641	0.00680953346018981	Hsp90aa1
ENSMUSG00000021214	542.976343028031	1.43377632496558	0.00680953346018981	Akr1c18
ENSMUSG00000052415	785.986932535035	-0.54769434931953	0.0069064449673838	Tchh
ENSMUSG00000038623	120.030625441974	1.26242804596413	0.0072536101369701	Tm6sf1
ENSMUSG00000026579	53.8445237160936	5.00516737003782	0.00725744884519072	F5
ENSMUSG00000031604	4027.38325246043	0.511928995198213	0.00728175817601396	Msmo1
ENSMUSG00000020814	19.9503085673169	1.81951394481043	0.00731324746459772	Mxra7
ENSMUSG00000028410	8247.42980808835	-0.778939511076552	0.0073870819625745	Dnaja1
ENSMUSG00000000204	3599.53337900615	5.22021710194958	0.00743043990867538	Slfn4
ENSMUSG00000024087	147.128380492465	1.01489295168172	0.00743653612537989	Cyp1b1
ENSMUSG00000051041	3.06543951629359	5.05512653365067	0.00745336066469923	Olfml1
ENSMUSG00000022488	239.384275590514	1.33544258771036	0.00747529443404281	Nckap1l
ENSMUSG00000020121	217.226504451565	0.746563419460241	0.00749539237961359	Srgap1
ENSMUSG00000057315	533.567556345179	0.961662393813892	0.00762353731756598	Arhgap24
ENSMUSG00000028480	69.375882065096	1.93741093782003	0.00764573123091563	Glipr2
ENSMUSG00000053158	308.990944028402	0.775689602682661	0.00779359129921482	Fes
ENSMUSG00000034320	3563.21304039053	-0.450987953058252	0.00779966754251955	Slc26a2
ENSMUSG00000049804	35.213091771385	1.20837533125563	0.00779966754251955	Armcx4
ENSMUSG00000048138	7.99333793343973	3.41532745544323	0.00789268506666028	Dmrt2
ENSMUSG00000028859	548.719114920902	4.46242484535022	0.00796195817626208	Csf3r
ENSMUSG00000056071	1662.44755027621	2.18342930807468	0.00802650672584368	S100a9
ENSMUSG00000024053	539.806229792222	2.40107734459169	0.00811898191930404	Emilin2
ENSMUSG00000001128	292.522089952393	0.826654924895534	0.00811898191930404	Cfp
ENSMUSG00000035545	5927.05418854932	-0.344342596929082	0.00826212717318406	Leng8
ENSMUSG00000002111	345.708846767206	0.916404337997724	0.00832767116682623	Spi1
ENSMUSG00000042993	9.80136317646514	2.60395200062377	0.00835300907350693	Ifnk
ENSMUSG00000021904	4.64071444181431	3.06312217782932	0.00840089948204191	Sema3g
ENSMUSG00000042429	13.305608277881	2.05436691150197	0.00840333807383626	Adora1
ENSMUSG00000049130	242.349390065243	4.44483053202078	0.00862019344242061	C5ar1
ENSMUSG00000058396	11.9460628824879	2.89185363441802	0.00862592707928956	Gpr182
ENSMUSG00000041147	922.850782391926	-0.400644996849689	0.00866300476957284	Brca2
ENSMUSG00000001741	43.7393127196927	2.06052592752837	0.00867855278503963	Il16
ENSMUSG00000053137	234.110678672875	0.605043004546034	0.00869387678211229	Mapk11
ENSMUSG00000028078	11.3963341621342	2.04337314539003	0.00874865739510135	Dclk2
ENSMUSG00000111229	49.7954625525799	-1.23892145382755	0.00892947261324152	NA
ENSMUSG00000018593	5693.03718633048	-0.414164125572302	0.00892947261324152	Sparc
ENSMUSG00000004651	6.67238520565348	3.738996327568	0.00908273444251645	Tyr
ENSMUSG00000021759	152.370475085579	0.766423423661785	0.00925682357001678	Plpp1
ENSMUSG00000033355	124.358976079503	3.13405884064168	0.00925939132170583	Rtp4
ENSMUSG00000043903	5.6437538021413	4.34084107304225	0.00927285751576159	Zfp469
ENSMUSG00000074676	4.4863780353131	4.3023062210995	0.00928935900026775	Foxs1
ENSMUSG00000020130	2124.29059583597	-0.208943197991779	0.00928935900026775	Tbc1d15
ENSMUSG00000094733	163.482520586654	2.37966981321056	0.00938757227212206	Csta3
ENSMUSG00000031165	61.1869487766193	1.35023090698477	0.00943706180844189	Was
ENSMUSG00000025422	95.9440199451366	1.18442620145363	0.00946947876149016	Agap2
ENSMUSG00000030144	513.23039112345	4.44448262131003	0.00949451706541953	Clec4d
ENSMUSG00000029298	76.1907041581627	1.68275896172849	0.00950808515868731	Gbp9
ENSMUSG00000018507	132.795388530324	1.05770816372211	0.0095536039247352	Trpv2
ENSMUSG00000021087	49.5022239271659	1.39585777631948	0.00957769572145137	Rtn1
ENSMUSG00000022014	49.6907694430886	1.88765545913723	0.00963260469735785	Epsti1
ENSMUSG00000079105	3.86427772491488	4.69259922137921	0.0096694918520618	C7
ENSMUSG00000025279	703.186623278099	0.87874476858769	0.00969728143620952	Dnase1l3
ENSMUSG00000046491	3.70247890590469	4.67235674572107	0.00971460587993136	C1qtnf2
ENSMUSG00000058794	17.5242098232899	4.35381200825748	0.00978229428393841	Nfe2
ENSMUSG00000030413	26.872841768312	4.24578750926116	0.00986925890251535	Pglyrp1
ENSMUSG00000002808	41.6152103890576	1.24621707485058	0.00987066106782211	Epdr1
ENSMUSG00000038213	980.898195711263	0.305597676958141	0.00994252716046334	Tapbpl
NA	NA	NA	NA	NA
NA.1	NA	NA	NA	NA
NA.2	NA	NA	NA	NA
NA.3	NA	NA	NA	NA
NA.4	NA	NA	NA	NA
NA.5	NA	NA	NA	NA
NA.6	NA	NA	NA	NA
NA.7	NA	NA	NA	NA
NA.8	NA	NA	NA	NA
NA.9	NA	NA	NA	NA
NA.10	NA	NA	NA	NA
NA.11	NA	NA	NA	NA
NA.12	NA	NA	NA	NA
NA.13	NA	NA	NA	NA
NA.14	NA	NA	NA	NA
NA.15	NA	NA	NA	NA
NA.16	NA	NA	NA	NA
NA.17	NA	NA	NA	NA
NA.18	NA	NA	NA	NA
NA.19	NA	NA	NA	NA
NA.20	NA	NA	NA	NA
NA.21	NA	NA	NA	NA
NA.22	NA	NA	NA	NA
NA.23	NA	NA	NA	NA
NA.24	NA	NA	NA	NA
NA.25	NA	NA	NA	NA
NA.26	NA	NA	NA	NA
NA.27	NA	NA	NA	NA
NA.28	NA	NA	NA	NA
NA.29	NA	NA	NA	NA
NA.30	NA	NA	NA	NA
NA.31	NA	NA	NA	NA
NA.32	NA	NA	NA	NA
NA.33	NA	NA	NA	NA
NA.34	NA	NA	NA	NA
NA.35	NA	NA	NA	NA
NA.36	NA	NA	NA	NA
NA.37	NA	NA	NA	NA
NA.38	NA	NA	NA	NA
NA.39	NA	NA	NA	NA
NA.40	NA	NA	NA	NA
NA.41	NA	NA	NA	NA
NA.42	NA	NA	NA	NA
NA.43	NA	NA	NA	NA
NA.44	NA	NA	NA	NA
NA.45	NA	NA	NA	NA
NA.46	NA	NA	NA	NA
NA.47	NA	NA	NA	NA
NA.48	NA	NA	NA	NA
NA.49	NA	NA	NA	NA
NA.50	NA	NA	NA	NA
NA.51	NA	NA	NA	NA
NA.52	NA	NA	NA	NA
NA.53	NA	NA	NA	NA
NA.54	NA	NA	NA	NA
NA.55	NA	NA	NA	NA
NA.56	NA	NA	NA	NA
NA.57	NA	NA	NA	NA
NA.58	NA	NA	NA	NA
NA.59	NA	NA	NA	NA
NA.60	NA	NA	NA	NA
NA.61	NA	NA	NA	NA
NA.62	NA	NA	NA	NA
NA.63	NA	NA	NA	NA
NA.64	NA	NA	NA	NA
NA.65	NA	NA	NA	NA
NA.66	NA	NA	NA	NA
NA.67	NA	NA	NA	NA
NA.68	NA	NA	NA	NA
NA.69	NA	NA	NA	NA
NA.70	NA	NA	NA	NA
NA.71	NA	NA	NA	NA
NA.72	NA	NA	NA	NA
NA.73	NA	NA	NA	NA
NA.74	NA	NA	NA	NA
NA.75	NA	NA	NA	NA
NA.76	NA	NA	NA	NA
NA.77	NA	NA	NA	NA
NA.78	NA	NA	NA	NA
NA.79	NA	NA	NA	NA
NA.80	NA	NA	NA	NA
NA.81	NA	NA	NA	NA
NA.82	NA	NA	NA	NA
NA.83	NA	NA	NA	NA
NA.84	NA	NA	NA	NA
NA.85	NA	NA	NA	NA
NA.86	NA	NA	NA	NA
NA.87	NA	NA	NA	NA
NA.88	NA	NA	NA	NA
NA.89	NA	NA	NA	NA
NA.90	NA	NA	NA	NA
NA.91	NA	NA	NA	NA
NA.92	NA	NA	NA	NA
NA.93	NA	NA	NA	NA
NA.94	NA	NA	NA	NA
NA.95	NA	NA	NA	NA
NA.96	NA	NA	NA	NA
NA.97	NA	NA	NA	NA
NA.98	NA	NA	NA	NA
NA.99	NA	NA	NA	NA
NA.100	NA	NA	NA	NA
NA.101	NA	NA	NA	NA
NA.102	NA	NA	NA	NA
NA.103	NA	NA	NA	NA
NA.104	NA	NA	NA	NA
NA.105	NA	NA	NA	NA
NA.106	NA	NA	NA	NA
NA.107	NA	NA	NA	NA
NA.108	NA	NA	NA	NA
NA.109	NA	NA	NA	NA
NA.110	NA	NA	NA	NA
NA.111	NA	NA	NA	NA
NA.112	NA	NA	NA	NA
NA.113	NA	NA	NA	NA
NA.114	NA	NA	NA	NA
NA.115	NA	NA	NA	NA
NA.116	NA	NA	NA	NA
NA.117	NA	NA	NA	NA
NA.118	NA	NA	NA	NA
NA.119	NA	NA	NA	NA
NA.120	NA	NA	NA	NA
NA.121	NA	NA	NA	NA
NA.122	NA	NA	NA	NA
NA.123	NA	NA	NA	NA
NA.124	NA	NA	NA	NA
NA.125	NA	NA	NA	NA
NA.126	NA	NA	NA	NA
NA.127	NA	NA	NA	NA
NA.128	NA	NA	NA	NA
NA.129	NA	NA	NA	NA
NA.130	NA	NA	NA	NA
NA.131	NA	NA	NA	NA
NA.132	NA	NA	NA	NA
NA.133	NA	NA	NA	NA
NA.134	NA	NA	NA	NA
NA.135	NA	NA	NA	NA
NA.136	NA	NA	NA	NA
NA.137	NA	NA	NA	NA
NA.138	NA	NA	NA	NA
NA.139	NA	NA	NA	NA
NA.140	NA	NA	NA	NA
NA.141	NA	NA	NA	NA
NA.142	NA	NA	NA	NA
NA.143	NA	NA	NA	NA
NA.144	NA	NA	NA	NA
NA.145	NA	NA	NA	NA
NA.146	NA	NA	NA	NA
NA.147	NA	NA	NA	NA
NA.148	NA	NA	NA	NA
NA.149	NA	NA	NA	NA
NA.150	NA	NA	NA	NA
NA.151	NA	NA	NA	NA
NA.152	NA	NA	NA	NA
NA.153	NA	NA	NA	NA
NA.154	NA	NA	NA	NA
NA.155	NA	NA	NA	NA
NA.156	NA	NA	NA	NA
NA.157	NA	NA	NA	NA
NA.158	NA	NA	NA	NA
NA.159	NA	NA	NA	NA
NA.160	NA	NA	NA	NA
NA.161	NA	NA	NA	NA
NA.162	NA	NA	NA	NA
NA.163	NA	NA	NA	NA
NA.164	NA	NA	NA	NA
NA.165	NA	NA	NA	NA
NA.166	NA	NA	NA	NA
NA.167	NA	NA	NA	NA
NA.168	NA	NA	NA	NA
NA.169	NA	NA	NA	NA
NA.170	NA	NA	NA	NA
NA.171	NA	NA	NA	NA
NA.172	NA	NA	NA	NA
NA.173	NA	NA	NA	NA
NA.174	NA	NA	NA	NA
NA.175	NA	NA	NA	NA
NA.176	NA	NA	NA	NA
NA.177	NA	NA	NA	NA
NA.178	NA	NA	NA	NA
NA.179	NA	NA	NA	NA
NA.180	NA	NA	NA	NA
NA.181	NA	NA	NA	NA
NA.182	NA	NA	NA	NA
NA.183	NA	NA	NA	NA
NA.184	NA	NA	NA	NA
NA.185	NA	NA	NA	NA
NA.186	NA	NA	NA	NA
NA.187	NA	NA	NA	NA
NA.188	NA	NA	NA	NA
NA.189	NA	NA	NA	NA
NA.190	NA	NA	NA	NA
NA.191	NA	NA	NA	NA
NA.192	NA	NA	NA	NA
NA.193	NA	NA	NA	NA
NA.194	NA	NA	NA	NA
NA.195	NA	NA	NA	NA
NA.196	NA	NA	NA	NA
NA.197	NA	NA	NA	NA
NA.198	NA	NA	NA	NA
NA.199	NA	NA	NA	NA
NA.200	NA	NA	NA	NA
NA.201	NA	NA	NA	NA
NA.202	NA	NA	NA	NA
NA.203	NA	NA	NA	NA
NA.204	NA	NA	NA	NA
NA.205	NA	NA	NA	NA
NA.206	NA	NA	NA	NA
NA.207	NA	NA	NA	NA
NA.208	NA	NA	NA	NA
NA.209	NA	NA	NA	NA
NA.210	NA	NA	NA	NA
NA.211	NA	NA	NA	NA
NA.212	NA	NA	NA	NA
NA.213	NA	NA	NA	NA
NA.214	NA	NA	NA	NA
NA.215	NA	NA	NA	NA
NA.216	NA	NA	NA	NA
NA.217	NA	NA	NA	NA
NA.218	NA	NA	NA	NA
NA.219	NA	NA	NA	NA
NA.220	NA	NA	NA	NA
NA.221	NA	NA	NA	NA
NA.222	NA	NA	NA	NA
NA.223	NA	NA	NA	NA
NA.224	NA	NA	NA	NA
NA.225	NA	NA	NA	NA
NA.226	NA	NA	NA	NA
NA.227	NA	NA	NA	NA
NA.228	NA	NA	NA	NA
NA.229	NA	NA	NA	NA
NA.230	NA	NA	NA	NA
NA.231	NA	NA	NA	NA
NA.232	NA	NA	NA	NA
NA.233	NA	NA	NA	NA
NA.234	NA	NA	NA	NA
NA.235	NA	NA	NA	NA
NA.236	NA	NA	NA	NA
NA.237	NA	NA	NA	NA
NA.238	NA	NA	NA	NA
NA.239	NA	NA	NA	NA
NA.240	NA	NA	NA	NA
NA.241	NA	NA	NA	NA
NA.242	NA	NA	NA	NA
NA.243	NA	NA	NA	NA
NA.244	NA	NA	NA	NA
NA.245	NA	NA	NA	NA
NA.246	NA	NA	NA	NA
NA.247	NA	NA	NA	NA
NA.248	NA	NA	NA	NA
NA.249	NA	NA	NA	NA
NA.250	NA	NA	NA	NA
NA.251	NA	NA	NA	NA
NA.252	NA	NA	NA	NA
NA.253	NA	NA	NA	NA
NA.254	NA	NA	NA	NA
NA.255	NA	NA	NA	NA
NA.256	NA	NA	NA	NA
NA.257	NA	NA	NA	NA
NA.258	NA	NA	NA	NA
NA.259	NA	NA	NA	NA
NA.260	NA	NA	NA	NA
NA.261	NA	NA	NA	NA
NA.262	NA	NA	NA	NA
NA.263	NA	NA	NA	NA
NA.264	NA	NA	NA	NA
NA.265	NA	NA	NA	NA
NA.266	NA	NA	NA	NA
NA.267	NA	NA	NA	NA
NA.268	NA	NA	NA	NA
NA.269	NA	NA	NA	NA
NA.270	NA	NA	NA	NA
NA.271	NA	NA	NA	NA
NA.272	NA	NA	NA	NA
NA.273	NA	NA	NA	NA
NA.274	NA	NA	NA	NA
NA.275	NA	NA	NA	NA
NA.276	NA	NA	NA	NA
NA.277	NA	NA	NA	NA
NA.278	NA	NA	NA	NA
NA.279	NA	NA	NA	NA
NA.280	NA	NA	NA	NA
NA.281	NA	NA	NA	NA
NA.282	NA	NA	NA	NA
NA.283	NA	NA	NA	NA
NA.284	NA	NA	NA	NA
NA.285	NA	NA	NA	NA
NA.286	NA	NA	NA	NA
NA.287	NA	NA	NA	NA
NA.288	NA	NA	NA	NA
NA.289	NA	NA	NA	NA
NA.290	NA	NA	NA	NA
NA.291	NA	NA	NA	NA
NA.292	NA	NA	NA	NA
NA.293	NA	NA	NA	NA
NA.294	NA	NA	NA	NA
NA.295	NA	NA	NA	NA
NA.296	NA	NA	NA	NA
NA.297	NA	NA	NA	NA
NA.298	NA	NA	NA	NA
NA.299	NA	NA	NA	NA
NA.300	NA	NA	NA	NA
NA.301	NA	NA	NA	NA
NA.302	NA	NA	NA	NA
NA.303	NA	NA	NA	NA

## Sheet: AhR-poor diet
gene	baseMean	log2FoldChange	symbol
ENSMUSG00000044734	3218.21402498019	3.29580090190803	Serpinb1a
ENSMUSG00000026822	1808.68016000493	5.35784258516652	Lcn2
ENSMUSG00000001131	418.534230537141	6.90767029821787	Timp1
ENSMUSG00000056515	1937.96491986442	3.29682811239743	Rab31
ENSMUSG00000049303	378.10416953399	2.50496543364197	Syt12
ENSMUSG00000071561	7761.47078265486	2.90347773843722	Cstdc5
ENSMUSG00000030681	5014.83419291363	1.47994292889365	Mvp
ENSMUSG00000021509	2141.20252338212	2.49074796442611	Slc25a48
ENSMUSG00000021091	1303.94941931656	5.30418038083008	Serpina3n
ENSMUSG00000026880	10708.3395664556	2.41103593263233	Stom
ENSMUSG00000026180	557.769371544627	4.92292833137591	Cxcr2
ENSMUSG00000096001	4476.51747634655	4.91171179525594	2610528A11Rik
ENSMUSG00000058624	1140.4369118625	2.66431064686133	Gda
ENSMUSG00000071562	2673.47519429521	2.32389820575861	Stfa1
ENSMUSG00000024909	149.617241321775	3.12979913030025	Efemp2
ENSMUSG00000027639	6877.5094079496	2.73742046122265	Samhd1
ENSMUSG00000024891	1436.48457712926	2.49975835608882	Slc29a2
ENSMUSG00000066800	737.767567380197	3.55964762815561	Rnasel
ENSMUSG00000028583	514.217359161696	4.45169107723483	Pdpn
ENSMUSG00000026069	352.440098697619	6.97346132094018	Il1rl1
ENSMUSG00000021190	3928.18997369773	2.26699537257708	Lgmn
ENSMUSG00000020009	2449.17227943025	1.48837948886712	Ifngr1
ENSMUSG00000053797	59177.229873166	4.00993389004816	Krt16
ENSMUSG00000045349	740.359017926999	4.74693536294344	Sh2d5
ENSMUSG00000025481	13349.2284842711	1.64889789994016	Urah
ENSMUSG00000045934	2099.62162010906	-0.990490456521474	Mtmr11
ENSMUSG00000105987	5386.43166579314	1.62497187016634	AI506816
ENSMUSG00000110368	347.240798218369	4.38635087580377	NA
ENSMUSG00000025647	5646.02837589036	1.15784985795986	Shisa5
ENSMUSG00000027737	906.884213184849	4.2597105681038	Slc7a11
ENSMUSG00000075602	9770.72820399271	1.95861315861164	Ly6a
ENSMUSG00000034361	3431.63807999859	1.84868108114207	Cpne2
ENSMUSG00000022094	1869.6435133441	2.50772021003225	Slc39a14
ENSMUSG00000014602	112.435333931507	4.09150576883367	Kif1a
ENSMUSG00000034853	396.038672778206	2.24427820427757	Acot11
ENSMUSG00000028194	111.141930694162	3.26423676131819	Ddah1
ENSMUSG00000025743	1139.43313563282	3.15036408912276	Sdc3
ENSMUSG00000020695	2099.2417261224	-1.44901774041827	Mrc2
ENSMUSG00000032348	2608.10949860189	3.64086034860309	Gsta4
ENSMUSG00000063694	2445.70860441769	0.993145455671116	Cycs
ENSMUSG00000014599	1782.71907891513	1.92243094837624	Csf1
ENSMUSG00000092572	1883.83502846001	-1.6918005038857	Serpinb10
ENSMUSG00000031402	3529.5606531698	1.32241966157162	Mpp1
ENSMUSG00000040688	2262.94769429691	0.698849932326925	Tbl3
ENSMUSG00000030862	998.670191127509	-1.41577444150772	Cpxm2
ENSMUSG00000038059	575.263343711287	3.08884276209794	Smim3
ENSMUSG00000079018	2696.4477674068	1.77502751237659	Ly6c1
ENSMUSG00000030098	302.598339581306	3.28399257458276	Grip2
ENSMUSG00000027332	1591.82237308444	-0.838720311036812	Ivd
ENSMUSG00000000730	116.469602403333	2.8790581826801	Dnmt3l
ENSMUSG00000052560	2251.1208218786	1.12019354689868	Cpne8
ENSMUSG00000021939	17475.6734038934	1.22979146944734	Ctsb
ENSMUSG00000001870	1234.00452224238	1.99927031663544	Ltbp1
ENSMUSG00000079037	10689.4087336964	1.10870780162483	Prnp
ENSMUSG00000037580	795.856175428783	1.76166822830429	Gch1
ENSMUSG00000031825	2894.67400683993	3.01074882632179	Crispld2
ENSMUSG00000086845	85.3676263286267	3.05797367716417	Gm13010
ENSMUSG00000031897	716.355012705896	1.68279688313999	Psmb10
ENSMUSG00000029093	413.201878591509	1.82728515536117	Sorcs2
ENSMUSG00000038388	892.916008087878	1.00466271584306	Mpp6
ENSMUSG00000030220	6884.46074390967	1.40139272061124	Arhgdib
ENSMUSG00000031755	714.594976351129	-1.05126696109516	Bbs2
ENSMUSG00000015966	424.753446781773	-1.41816803229496	Il17rb
ENSMUSG00000042073	1032.74366580341	-1.1005746459886	Abhd14b
ENSMUSG00000023963	940.492420309993	-1.05041730507114	Cyp39a1
ENSMUSG00000039997	190.585358263873	3.44420308701075	Ifi203
ENSMUSG00000028464	8736.77151021492	1.92830241666344	Tpm2
ENSMUSG00000020869	6553.01640983793	1.02195793470663	Lrrc59
ENSMUSG00000051048	129.764749014455	4.48564351887466	P4ha3
ENSMUSG00000044748	1437.36821224654	1.83876418246391	Defb1
ENSMUSG00000042244	475.981206375059	2.36809317081273	Pglyrp3
ENSMUSG00000027514	127.762905659149	5.3661251753323	Zbp1
ENSMUSG00000047441	79.8818870240903	5.10437726804306	Antxrl
ENSMUSG00000050447	126.897821463694	-1.85671881331844	Lypd6
ENSMUSG00000030218	278.29281011902	2.95031471207619	Mgp
ENSMUSG00000027227	1396.58052174282	-1.22331151563374	Sord
ENSMUSG00000030465	997.438282053056	-1.69859392393378	Psd3
ENSMUSG00000001918	1066.2768171031	1.3553208999517	Slc1a5
ENSMUSG00000048232	822.651148236664	1.69971916711118	Fbxo10
ENSMUSG00000021591	1030.61088754598	1.80679892334358	Glrx
ENSMUSG00000020116	2105.97107957829	0.768819112336844	Pno1
ENSMUSG00000056071	1662.44755027621	6.77066722322588	S100a9
ENSMUSG00000031799	20843.7651526478	0.937369243812182	Tpm4
ENSMUSG00000032038	532.941252520313	2.3474020502032	St3gal4
ENSMUSG00000022769	787.723889031444	1.68506979700866	Sdf2l1
ENSMUSG00000032020	867.278597978629	1.7480762925214	Ubash3b
ENSMUSG00000029762	1837.02444252875	1.80340851580108	Akr1b8
ENSMUSG00000001416	8145.27579633306	0.712135458728814	Cct3
ENSMUSG00000039519	345.220621741217	2.81175591185593	Cyp7b1
ENSMUSG00000033355	124.358976079503	5.68585665324801	Rtp4
ENSMUSG00000018378	1442.42328636276	-0.895650355927908	2210416O15Rik
ENSMUSG00000050063	251.922301287792	3.6346863438475	Klk6
ENSMUSG00000012350	1750.64551001815	1.85915016809464	Ehf
ENSMUSG00000024078	1401.95879730107	0.85198090193225	Ttc27
ENSMUSG00000021803	3378.33361585966	5.0094535436507	Cdhr1
ENSMUSG00000026245	2734.58914010221	0.934453825475073	Farsb
ENSMUSG00000004460	4478.47598768029	0.958744961617459	Dnajb11
ENSMUSG00000005686	2053.05054219423	1.22027720779881	Ampd3
ENSMUSG00000031209	801.78208484653	-1.88243585404481	Heph
ENSMUSG00000069769	1147.25291799777	-0.8582377504264	Msi2
ENSMUSG00000055538	385.368179631837	1.63832959618256	Zcchc24
ENSMUSG00000028633	2117.10272165807	0.899282079772993	Ctps
ENSMUSG00000022962	3722.06789843304	0.700101383762292	Gart
ENSMUSG00000022475	6617.52718429035	1.24317733063409	Hdac7
ENSMUSG00000023048	5227.19322114294	1.31690506849501	Prr13
ENSMUSG00000029622	4744.77497196969	1.08578930863579	Arpc1b
ENSMUSG00000025927	3536.05444095233	-0.848533632696787	Tfap2b
ENSMUSG00000029632	4354.61684847248	0.932933500705186	Ndufa4
ENSMUSG00000032666	2951.53565479662	-0.710134039908857	1700025G04Rik
ENSMUSG00000059901	1897.54332092623	-2.20670405129504	Adamts14
ENSMUSG00000027832	106.475553203937	5.07511516640697	Ptx3
ENSMUSG00000026070	146.652967487339	2.17691309938831	Il18r1
ENSMUSG00000003849	780.448995624995	2.37639659411639	Nqo1
ENSMUSG00000046718	253.964454586288	3.17890571120214	Bst2
ENSMUSG00000029561	541.726455550871	5.75830735315328	Oasl2
ENSMUSG00000039953	8430.87811751965	-0.808628544870514	Clstn1
ENSMUSG00000024679	106.349974481773	4.10166091192229	Ms4a6d
ENSMUSG00000029270	467.410958387191	1.54932157712447	Dipk1a
ENSMUSG00000030849	11142.0350560604	-0.815815785168607	Fgfr2
ENSMUSG00000034522	1714.1438177337	-1.18972142056516	Zfp395
ENSMUSG00000022791	6926.80129082027	-0.912331108531921	Tnk2
ENSMUSG00000010358	1009.60902017607	1.64364628669425	Ifi35
ENSMUSG00000021947	411.649681543806	-1.22222492911194	Cryl1
ENSMUSG00000027932	9142.84977787125	1.359253478248	Slc27a3
ENSMUSG00000031750	3365.57380539059	-1.773111467686	Il34
ENSMUSG00000024312	2940.50898252653	0.721669167533104	Wdr46
ENSMUSG00000026536	56.645649562308	5.08667030895154	Ifi211
ENSMUSG00000036943	2590.50412468913	1.2823970767528	Rab8b
ENSMUSG00000022902	55.6095468041996	3.40667376989305	Stfa2
ENSMUSG00000085403	102.491278913262	4.42027681293337	NA
ENSMUSG00000030339	1839.70979754199	0.935972733186795	Ltbr
ENSMUSG00000068551	495.600499598687	-1.35062067291948	Zfp467
ENSMUSG00000048915	1382.75530339598	1.30143549294221	Efna5
ENSMUSG00000047797	63.1776806580589	5.21336380270121	Gjb1
ENSMUSG00000074151	1383.96779249972	2.45081089091121	Nlrc5
ENSMUSG00000022629	5031.09113341891	-0.971771382520032	Kif21a
ENSMUSG00000021457	1394.52360691719	2.23973901144381	Syk
ENSMUSG00000061981	1470.4688275191	1.70580961019668	Flot2
ENSMUSG00000029761	746.194720516003	2.3958392186453	Cald1
ENSMUSG00000029484	383.581312632908	2.79630808807471	Anxa3
ENSMUSG00000050737	5538.91320566416	1.58238402101055	Ptges
ENSMUSG00000021375	3983.43407863962	-1.11623764936038	Kif13a
ENSMUSG00000027940	10756.2502586057	0.639389388813889	Tpm3
ENSMUSG00000003746	724.083382112071	1.55435127834826	Man1a
ENSMUSG00000027333	3037.76679443367	1.79535091905351	Smox
ENSMUSG00000057337	1345.27764686773	-1.44812277375116	Chst3
ENSMUSG00000026024	1237.20499200913	1.35018790209215	Als2
ENSMUSG00000026604	5815.70993075929	-1.13693217403959	Ptpn14
ENSMUSG00000022557	4618.53660871522	0.888620553229531	Bop1
ENSMUSG00000075028	454.788073181581	-1.18239818170808	Prdm11
ENSMUSG00000022587	5955.68020672342	1.23790708654168	Ly6e
ENSMUSG00000006732	1225.91219793558	0.862891322177993	Mettl1
ENSMUSG00000022203	4741.59084933262	-0.788143076283235	Efs
ENSMUSG00000033763	1487.58302992685	-1.5140444587222	Mtss2
ENSMUSG00000044813	1435.13112967845	1.59629136347839	Shb
ENSMUSG00000097104	79.7337567759726	2.54478549848696	Gm26579
ENSMUSG00000046719	529.755829902733	-1.55520352991861	Nxph3
ENSMUSG00000026674	2791.40255154328	2.56208660791075	Ddr2
ENSMUSG00000022546	4305.22819202093	-1.29050887490022	Gpt
ENSMUSG00000022471	1386.04688556607	0.726849306818595	Xrcc6
ENSMUSG00000022564	8377.09156798716	1.29310238487042	Grina
ENSMUSG00000042851	546.773489858408	-1.71343012092154	Zc3h6
ENSMUSG00000042500	2051.96613934052	-1.03516273299642	Ago4
ENSMUSG00000004462	1094.93633934561	1.12345861002996	Tbccd1
ENSMUSG00000034220	6886.03617216301	0.882764817526286	Gpc1
ENSMUSG00000038736	1376.46119974755	1.00830324406938	Nudcd1
ENSMUSG00000063060	2815.09672983578	-0.756776900791058	Sox7
ENSMUSG00000025511	339.014785810962	1.8896921967152	Tspan4
ENSMUSG00000026509	5978.69220910536	1.01601071736888	Capn2
ENSMUSG00000046982	1521.50884716463	-1.03391691430297	Tshz1
ENSMUSG00000015970	2797.99396616356	-0.876749918009293	Chdh
ENSMUSG00000003949	4138.11118432771	-1.7088902130834	Hlf
ENSMUSG00000030750	1252.65695152393	1.68552100400158	Nsmce1
ENSMUSG00000006818	3681.98839273214	0.779259482847714	Sod2
ENSMUSG00000013629	4255.48677853074	1.18001419956163	Cad
ENSMUSG00000073010	166.417377371972	-1.67172316609672	Gm5127
ENSMUSG00000025364	10840.1956257341	0.671795519508562	Pa2g4
ENSMUSG00000064246	224.728618964608	2.91873462023022	Chil1
ENSMUSG00000033065	922.041679509562	-1.14349845801377	Pfkm
ENSMUSG00000046354	116.590414454811	5.27264965231571	Defb14
ENSMUSG00000094733	163.482520586654	4.39436056495639	Csta3
ENSMUSG00000041506	2160.39418246749	0.888642108584059	Rrp9
ENSMUSG00000015134	152.200234242519	3.42064113329754	Aldh1a3
ENSMUSG00000002319	3054.73374437802	1.00784456758028	Ipo4
ENSMUSG00000030214	11933.393961978	0.998267545283023	Plbd1
ENSMUSG00000062867	9344.81097454392	0.776014022251761	Impdh2
ENSMUSG00000040483	196.071263464908	3.24595101392415	Xaf1
ENSMUSG00000025314	950.0925516882	1.80156777771424	Ptprj
ENSMUSG00000079523	5503.2665362739	1.43303983920765	Tmsb10
ENSMUSG00000035557	47148.4461197771	1.87643837386599	Krt17
ENSMUSG00000034424	1112.09177869378	1.23962615820402	Gcsh
ENSMUSG00000026104	908.260261933627	1.66993639330801	Stat1
ENSMUSG00000025887	607.051823603341	1.9559818341852	Casp12
ENSMUSG00000027223	457.208428178345	-1.11111504170168	Mapk8ip1
ENSMUSG00000037035	756.689368639187	1.11652978408189	Inhbb
ENSMUSG00000034057	67.3164219351352	4.73795689914274	Myrfl
ENSMUSG00000074415	501.956196297966	1.28391696989472	Mir100hg
ENSMUSG00000062937	942.395114314881	1.08931094373885	Mtap
ENSMUSG00000022378	1499.41261440142	1.09776819478564	Fam49b
ENSMUSG00000023272	2022.70820333531	1.26005459579003	Creld2
ENSMUSG00000001911	17830.3531431002	-0.641535764665639	Nfix
ENSMUSG00000058354	47567.0807364201	3.94396399488363	Krt6a
ENSMUSG00000032834	1821.35308180584	0.816760463072855	Pwp2
ENSMUSG00000038522	57.6799220242643	3.73598532362922	Mfsd4b1
ENSMUSG00000027883	4928.80255741836	-0.852160378003391	Gpsm2
ENSMUSG00000022241	4589.22032927029	0.650901719845025	Tars
ENSMUSG00000031403	2900.58243816829	0.754422878868434	Dkc1
ENSMUSG00000061458	1353.15251356481	0.872976632002093	Nol10
ENSMUSG00000009900	279.268845969899	-1.28478640733157	Wnt3a
ENSMUSG00000026749	205.994264523699	1.7653918146484	Nek6
ENSMUSG00000029541	505.327588802915	-2.44122635698127	Cyp2w1
ENSMUSG00000026131	26624.7122648411	-1.25408315853343	Dst
ENSMUSG00000056054	752.229389831819	6.23432559485755	S100a8
ENSMUSG00000093573	63.0165680756588	5.39158517272885	NA
ENSMUSG00000026271	638.812106922646	2.11936013722454	Gpr35
ENSMUSG00000025213	331.134533634388	-1.53778649197912	Kazald1
ENSMUSG00000038119	1780.69432401587	-1.16181576398727	Cdon
ENSMUSG00000025492	10594.2676591219	1.59232666925788	Ifitm3
ENSMUSG00000035692	350.000312101891	4.83038499622098	Isg15
ENSMUSG00000011257	2227.38523171748	0.775254943218981	Pabpc4
ENSMUSG00000032014	215.344483800853	1.96024683649617	Oaf
ENSMUSG00000030341	9936.58704915689	0.582886070061938	Tnfrsf1a
ENSMUSG00000055368	428.227001527131	-1.99700487190117	Slc6a2
ENSMUSG00000015224	484.594273244955	-1.2807088045381	Cyp2j9
ENSMUSG00000020111	1609.22772984562	-0.714187421404698	Micu1
ENSMUSG00000041954	1259.39252347344	1.57872955015683	Tnfrsf18
ENSMUSG00000070284	910.367243474874	1.23744262460025	Gmppb
ENSMUSG00000019139	1275.60459131202	1.02187232861534	Isyna1
ENSMUSG00000033361	147.100694083786	-1.52230742096118	Prrg3
ENSMUSG00000004040	16286.9793383077	0.916732218497432	Stat3
ENSMUSG00000043668	59.9485167094113	-2.29388807833636	Tox3
ENSMUSG00000006442	3822.86339649081	1.00402197507113	Srm
ENSMUSG00000028268	84.5515018248888	3.96792220076063	Gbp3
ENSMUSG00000032661	190.265602426508	5.59950604156953	Oas3
ENSMUSG00000029371	190.867377858705	9.32186629531668	Cxcl5
ENSMUSG00000032411	1324.9966135902	-0.981917083257407	Tfdp2
ENSMUSG00000005413	954.004925031721	2.58228419773362	Hmox1
ENSMUSG00000016554	6319.6779034118	0.556023422946213	Eif3d
ENSMUSG00000097636	56.174682284872	4.39214201575977	NA
ENSMUSG00000069662	2543.04852352889	1.33887367880465	Marcks
ENSMUSG00000033706	1211.17872975978	0.872969615823953	Smyd5
ENSMUSG00000070327	958.101370162032	2.8571987609786	Rnf213
ENSMUSG00000020077	1717.50672611606	5.15642909682613	Srgn
ENSMUSG00000027422	5358.42123452066	0.860713067578024	Rrbp1
ENSMUSG00000074445	441.311451277092	4.41002601143921	Sprr2a3
ENSMUSG00000017999	4259.94999174076	0.490430199861402	Ddx27
ENSMUSG00000025650	19190.8152414697	-0.872297760339149	Col7a1
ENSMUSG00000019848	546.739694898831	-0.915183346574076	Popdc3
ENSMUSG00000024529	109.633377206401	4.08088422600852	Lox
ENSMUSG00000051497	81.914850511918	-2.97735149121559	Kcnj16
ENSMUSG00000059248	6181.73384925026	1.06225602305497	2009-09-01
ENSMUSG00000041560	14553.2834664691	-0.622236483945804	Nop53
ENSMUSG00000029379	168.095273753873	7.42082289827464	Cxcl3
ENSMUSG00000029563	291.374614504189	-1.68897634082612	Foxp2
ENSMUSG00000023044	1422.17684360302	-1.04146457518535	Csad
ENSMUSG00000029802	2070.31147259016	1.39779816172607	Abcg2
ENSMUSG00000022389	8127.13020023315	-0.984923503283913	Tef
ENSMUSG00000063015	6849.24473855077	-0.741655497364605	Ccni
ENSMUSG00000026883	5038.00069976271	-0.689955656967963	Dab2ip
ENSMUSG00000027420	154.277126685893	2.14957008960998	Bfsp1
ENSMUSG00000021775	5146.47934821892	-0.686577581090557	Nr1d2
ENSMUSG00000005873	11632.2904598941	-0.784817884229995	Reep5
ENSMUSG00000024165	4023.41983830558	0.902934558498895	Jpt2
ENSMUSG00000016262	2123.59013948774	-1.21838893604961	Sertad4
ENSMUSG00000057751	2058.03986446351	-1.37128043867058	Megf6
ENSMUSG00000014859	2827.35986417732	0.716345630916297	E2f4
ENSMUSG00000003665	353.850533110711	2.70098110974892	Has1
ENSMUSG00000004936	2219.44397602058	0.890280715161647	Map2k1
ENSMUSG00000021131	2092.00617943887	0.743126684322025	Erh
ENSMUSG00000050359	14889.2364712067	1.92540965362517	Sprr1a
ENSMUSG00000035314	389.369669366	-1.04873764841355	Gdpd5
ENSMUSG00000027859	344.858656560917	2.44869969033938	Ngf
ENSMUSG00000054793	233.104710199967	3.21588097865005	Cadm4
ENSMUSG00000032011	4336.25465550041	1.27722251878806	Thy1
ENSMUSG00000001123	2146.70951376233	1.81923046127413	Lgals9
ENSMUSG00000060073	5480.7620262327	0.477317873835855	Psma3
ENSMUSG00000034990	51.6074517063726	-2.31404462867018	Otoa
ENSMUSG00000028741	2462.11239527142	0.857958926665558	Mrto4
ENSMUSG00000000204	3599.53337900615	9.55678818290126	Slfn4
ENSMUSG00000052776	130.432531768914	3.74838996634135	Oas1a
ENSMUSG00000100183	50.3936749648311	4.47082714239781	NA
ENSMUSG00000030748	3648.34278013199	1.8347517279017	Il4ra
ENSMUSG00000057614	4990.53356412667	-0.793725698246319	Gnai1
ENSMUSG00000067367	1952.45069693986	0.969500989863128	Lyar
ENSMUSG00000048772	74.3192760776111	-1.72217593441334	Tmem53
ENSMUSG00000001436	802.039695912509	1.02394542748236	Slc19a1
ENSMUSG00000027423	5794.84139729413	0.49614327780062	Snx5
ENSMUSG00000027398	2246.22175134212	6.53380995152953	Il1b
ENSMUSG00000040263	1717.81715432202	0.643721431544105	Klhdc4
ENSMUSG00000024083	2030.10244405727	-0.630366453511913	Pja2
ENSMUSG00000030921	175.223587939992	4.82354917611157	Trim30a
ENSMUSG00000040659	2617.06032197515	1.23557859881961	Efhd2
ENSMUSG00000038650	16447.0236136355	0.800479090867273	Rnh1
ENSMUSG00000025161	977.349495000585	3.92270107607935	Slc16a3
ENSMUSG00000040652	1995.69902015099	-1.113364186359	Oaz2
ENSMUSG00000024997	527.064208817056	0.963995340228844	Prdx3
ENSMUSG00000020484	4281.21244780356	0.885974084666635	Xbp1
ENSMUSG00000026420	368.834867280459	3.93173594212269	Il24
ENSMUSG00000020571	7793.03997910949	1.03641735673455	Pdia6
ENSMUSG00000036817	5575.51675195943	-0.528829090565659	Sun1
ENSMUSG00000037493	2002.21977908101	-1.29160203352524	Cib2
ENSMUSG00000023224	459.800820124955	2.61886318131821	Serping1
ENSMUSG00000036882	908.110323543783	-0.884164684588498	Arhgap33
ENSMUSG00000046532	1473.26163083712	-0.998770919684844	Ar
ENSMUSG00000051439	1508.07016868992	5.72201679967183	Cd14
ENSMUSG00000040136	61.0969340063665	3.49903676421544	Abcc8
ENSMUSG00000024485	316.765376669557	-2.17552965279376	Slc4a9
ENSMUSG00000004356	2967.06813911395	0.718612800390055	Utp20
ENSMUSG00000040123	2221.73201975997	-0.569185413797798	Zmym5
ENSMUSG00000030319	208.580186947162	-1.18819119995256	Cand2
ENSMUSG00000095567	7653.96089950744	0.707407076701124	Noc2l
ENSMUSG00000040463	10641.5438274816	0.696292954916043	Mybbp1a
ENSMUSG00000018334	2398.29507895312	1.16335736658418	Ksr1
ENSMUSG00000043673	200.768794132036	2.1171608757143	Kcns3
ENSMUSG00000025212	2365.07269924519	-0.761209355114961	Sfxn3
ENSMUSG00000043613	1109.31764672022	3.4022024342422	Mmp3
ENSMUSG00000045671	1932.60272018516	-0.923754755366242	Spred2
ENSMUSG00000040631	2500.91242656632	-1.44142785733618	Dok4
ENSMUSG00000052310	4732.95609817112	0.757383533203421	Slc39a1
ENSMUSG00000021266	2118.19044899702	0.715596208826363	Wars
ENSMUSG00000025817	3015.38683807163	1.02779313966107	Nudt5
ENSMUSG00000031948	5899.09143750507	0.538323021574501	Kars
ENSMUSG00000036306	226.670963464231	-1.51550628588572	Lzts1
ENSMUSG00000020334	3775.83813023868	-1.27277448056127	Slc22a4
ENSMUSG00000026019	1413.51195390699	0.788498915693039	Wdr12
ENSMUSG00000018008	179.726679818093	3.42015894418065	Cyth4
ENSMUSG00000029455	5770.89364994764	-0.515068575936922	Aldh2
ENSMUSG00000013415	89.8477168826911	4.21425218542233	Igf2bp1
ENSMUSG00000031245	1437.02170599708	-0.829049716168306	Hmgn5
ENSMUSG00000025223	11582.381168574	-0.781755627414236	Ldb1
ENSMUSG00000031207	13693.6403013059	1.19599371467316	Msn
ENSMUSG00000039070	169.448136545383	2.46191758620912	Cpa4
ENSMUSG00000001424	5635.75803558457	0.834315918826605	Snd1
ENSMUSG00000054203	75.8733459665381	4.3835034510759	Ifi205
ENSMUSG00000017002	1994.44592377586	3.80532987648506	Slpi
ENSMUSG00000059796	37239.788222818	0.40343407934215	Eif4a1
ENSMUSG00000036278	803.997537838984	-0.776097217657273	Macrod1
ENSMUSG00000038949	1837.5927192385	-0.799464543457627	Cnst
ENSMUSG00000020361	9831.95938668557	0.567983084953102	Hspa4
ENSMUSG00000027978	326.298461138525	2.57831159595638	Prss12
ENSMUSG00000050854	1079.31423736797	1.27518452393778	Tmem125
ENSMUSG00000035754	2066.1936142063	0.602894921617213	Wdr18
ENSMUSG00000059182	1865.70803615793	1.21412928548288	Skap2
ENSMUSG00000001847	14138.5362460312	0.582041675691899	Rac1
ENSMUSG00000023988	1704.48113439604	0.801773090376851	Bysl
ENSMUSG00000020661	1266.05137133785	-0.78906327379919	Dnmt3a
ENSMUSG00000019579	1546.49228988539	0.682137492916282	Mydgf
ENSMUSG00000022871	473.345302809909	2.37351394858223	Fetub
ENSMUSG00000041202	62.9285814875082	2.07202493835633	Pla2g2d
ENSMUSG00000022969	270.383364941619	1.47470888881576	Il10rb
ENSMUSG00000038112	34.4016213212705	2.92963580957688	AW551984
ENSMUSG00000109145	41.2315449883421	4.00810889623728	Gm20744
ENSMUSG00000031489	152.979597967753	-1.69691629360845	Adrb3
ENSMUSG00000032115	5858.94345416572	1.17520827299664	Hyou1
ENSMUSG00000013846	548.178234347438	2.05359652597534	St3gal1
ENSMUSG00000015652	29.1913022961107	3.11402305093978	Steap1
ENSMUSG00000030409	3911.08128261649	-1.73751514904102	Dmpk
ENSMUSG00000029605	91.4325114737623	1.90275527117826	Oas1b
ENSMUSG00000057596	68.8339687832125	3.98902156496372	Trim30d
ENSMUSG00000058260	425.353340938492	2.15173319637078	Serpina9
ENSMUSG00000022994	1691.31177874178	-0.837726592800862	Adcy6
ENSMUSG00000030834	67.2615617774229	-2.52159274403606	Abcc6
ENSMUSG00000042694	512.079679177445	0.916778510127025	Stn1
ENSMUSG00000066861	65.1520987757265	3.27190245470255	Oas1g
ENSMUSG00000055172	278.731860501042	1.80701169938033	C1ra
ENSMUSG00000037921	64.457148165457	4.74712152345304	Ddx60
ENSMUSG00000025082	925.783767239158	-1.31772508258359	Vwa2
ENSMUSG00000090216	66.5437533639768	7.01634850505205	NA
ENSMUSG00000029581	939.562890884424	2.19848149909431	Fscn1
ENSMUSG00000042156	562.771812104059	-0.909380788304833	Dzip1
ENSMUSG00000028412	4753.44190019771	-0.636983573394774	Slc44a1
ENSMUSG00000020473	440.200435371253	1.7460134076739	Aebp1
ENSMUSG00000063838	606.473722679469	-1.2463573858208	Cdc42ep5
ENSMUSG00000026222	205.308164932364	3.48970633037177	Sp100
ENSMUSG00000031934	1464.58139638268	0.86821084537481	Panx1
ENSMUSG00000020455	2702.21408521819	0.802849682081126	Trim11
ENSMUSG00000029447	7626.66448981351	0.556954653009316	Cct6a
ENSMUSG00000027377	4283.28501886158	1.17333841136545	Mall
ENSMUSG00000030643	808.485052247077	-1.03610269324745	Rab30
ENSMUSG00000020641	396.948129598039	6.79653700144415	Rsad2
ENSMUSG00000048142	4325.08711520559	1.19577657479606	Nat8l
ENSMUSG00000078954	107.440389516662	2.60900681287237	Arhgap8
ENSMUSG00000026991	3914.14118095851	0.857754462056598	Pkp4
ENSMUSG00000030738	13194.936327884	0.412023472959891	Eif3c
ENSMUSG00000049493	81.143003405041	-2.19911049501496	Pls1
ENSMUSG00000063275	65.2360084321471	1.71192332173881	Hacd1
ENSMUSG00000024120	2980.69392718639	0.640671097578744	Lrpprc
ENSMUSG00000040998	1200.40000930649	-1.81064060286328	Npnt
ENSMUSG00000029198	2571.44802652235	0.552455422839144	Grpel1
ENSMUSG00000038507	955.891244866493	1.53084064502784	Parp12
ENSMUSG00000006127	2252.74015658891	-0.750294397139531	Inpp5k
ENSMUSG00000006494	2440.66961861361	-0.782217612494764	Pdk1
ENSMUSG00000025491	151.365770604481	4.96509825672864	Ifitm1
ENSMUSG00000101389	48.6655987603188	5.80788517333426	Ms4a4a
ENSMUSG00000015094	2078.359908791	0.8614152608624	Npdc1
ENSMUSG00000003153	224.755860603699	3.1599480935691	Slc2a3
ENSMUSG00000019082	1217.10388600487	0.852764576361869	Slc25a22
ENSMUSG00000024829	1289.67580664707	0.591685801518863	Mrpl21
ENSMUSG00000030512	1708.07394878677	0.782345182393235	Snrpa1
ENSMUSG00000042793	1898.68595947028	-1.64081998369521	Lgr6
ENSMUSG00000002458	602.494291807456	0.764018116809663	Rgs19
ENSMUSG00000025780	734.17242611168	-1.85491771774541	Itih5
ENSMUSG00000047379	1154.29414313089	1.00151486078892	B4gat1
ENSMUSG00000027624	599.896563285027	-1.52738370742139	Epb41l1
ENSMUSG00000078664	50.2195477346551	3.82428579653703	Sprr2a1
ENSMUSG00000003500	1608.48752378536	0.9155514127672	Impdh1
ENSMUSG00000041620	58.9054442844873	3.96776500636195	Mmp1b
ENSMUSG00000025986	2989.45053658972	1.33100219302105	Slc39a10
ENSMUSG00000024349	631.585785548639	3.54597767223968	Tmem173
ENSMUSG00000000037	325.776856751893	-1.32086952826549	Scml2
ENSMUSG00000045636	1494.78052588393	-0.702983318646066	Mtus1
ENSMUSG00000014551	1320.52923993392	1.12224503622824	Mrps25
ENSMUSG00000031845	68.6366132702678	-2.65767054725608	Bco1
ENSMUSG00000026875	233.55335584001	3.16688549726075	Traf1
ENSMUSG00000042286	1725.91728654702	1.48739280701041	Stab1
ENSMUSG00000089647	43.5831242423118	5.53420577512387	LOC102632231
ENSMUSG00000018417	980.301337120622	1.7854764550724	Myo1b
ENSMUSG00000058755	156.613445323397	5.71771176464326	Osm
ENSMUSG00000028034	5260.79546331142	0.742566542608098	Fubp1
ENSMUSG00000022019	2222.67412800129	-0.673428583728462	Tdrd3
ENSMUSG00000079025	5974.03755564442	2.23205649259394	Gsdmc
ENSMUSG00000112148	531.542532332708	5.69784919186145	Lilrb4a
ENSMUSG00000001768	3138.27353511324	-0.756927014575921	Rin2
ENSMUSG00000036309	10270.6150767728	0.799633439060902	Skp1a
ENSMUSG00000002109	1123.45364750099	-0.590687734236259	Ddb2
ENSMUSG00000025613	10801.3126723012	0.561970701771626	Cct8
ENSMUSG00000030657	547.284196428899	1.38506768250307	Xylt1
ENSMUSG00000022906	1011.17989718791	1.49274926634108	Parp9
ENSMUSG00000020467	779.086979493098	-1.27729029392816	Efemp1
ENSMUSG00000023952	2291.93887534531	-0.422838912521522	Gtpbp2
ENSMUSG00000086448	738.845209472092	-1.28163355466701	NA
ENSMUSG00000035208	88.6525541892112	3.81395555263438	Slfn8
ENSMUSG00000037601	1096.17024772917	1.09895389286067	Nme1
ENSMUSG00000029752	3336.96430014736	0.881177656280608	Asns
ENSMUSG00000020089	3399.80967775597	1.15570413507954	Ppa1
ENSMUSG00000025823	4276.46960835582	1.05165522048933	Pdia4
ENSMUSG00000001665	505.252003690704	-1.02298341674843	Gstt3
ENSMUSG00000045382	359.081894258985	2.63487035976893	Cxcr4
ENSMUSG00000026068	116.616300204162	3.08758159879368	Il18rap
ENSMUSG00000042302	672.918458533154	-0.99274251457938	Ehbp1
ENSMUSG00000022237	168.8859819183	5.69805094703002	Ankrd33b
ENSMUSG00000097059	312.126162277965	-1.09459573317027	NA
ENSMUSG00000047139	8137.29173865571	0.979778933703171	Cd24a
ENSMUSG00000074577	369.556711011304	-1.53047307915132	Ripor3
ENSMUSG00000046337	192.88526846148	-1.10773078347948	Fam178b
ENSMUSG00000025007	3502.58205614452	1.03295073664465	Aldh18a1
ENSMUSG00000028613	451.483678322361	1.55740948128718	Lrp8
ENSMUSG00000053475	81.0807809111812	2.98799503507503	Tnfaip6
ENSMUSG00000029082	59.4404311008502	3.85499156355392	Bst1
ENSMUSG00000004446	167.29900740375	1.13671648946522	Bid
ENSMUSG00000025130	19252.9480594597	0.648027749263908	P4hb
ENSMUSG00000030228	507.148286971979	-1.7652003196788	Pik3c2g
ENSMUSG00000020142	1057.4968175924	-0.944075816100661	Slc1a4
ENSMUSG00000031584	1384.31738468443	1.0978216031312	Gsr
ENSMUSG00000037944	153.51274346391	3.05269890356823	Ccr7
ENSMUSG00000007610	998.436119477764	0.948227002864293	Gtpbp3
ENSMUSG00000027360	1240.1086272738	6.90907241616385	Hdc
ENSMUSG00000028776	1036.55030856413	1.92618171199267	Tinagl1
ENSMUSG00000039886	920.34956637085	0.75720645583639	Tmem120a
ENSMUSG00000037720	2799.13319747383	0.668090019154373	Tmem33
ENSMUSG00000002233	168.099494025398	2.41210866623991	Rhoc
ENSMUSG00000044139	46.4763979015107	2.27879045243564	Prss53
ENSMUSG00000021573	3154.04386841959	-1.16046673636609	Tppp
ENSMUSG00000023232	3191.75443975029	1.19193565546948	Serinc2
ENSMUSG00000021037	3471.49838853325	0.777132149536244	Ahsa1
ENSMUSG00000031490	1659.23539002671	0.956623011081322	Eif4ebp1
ENSMUSG00000011752	3083.22832736846	0.82266775502008	Pgam1
ENSMUSG00000075595	4623.47560576042	-0.835067909598411	Zfp652
ENSMUSG00000031562	876.386747712513	1.10121397248095	Dctd
ENSMUSG00000028156	3421.44860761113	0.657021854315626	Eif4e
ENSMUSG00000001707	1224.43294356995	0.807571152504256	Eef1e1
ENSMUSG00000017830	111.777253577434	2.77448043815726	Dhx58
ENSMUSG00000032002	2382.10720948911	0.507187971955664	Dcun1d5
ENSMUSG00000039879	2817.25694995224	-0.538993713900681	Heca
ENSMUSG00000028854	10448.1511252064	0.910022484625875	Slc9a1
ENSMUSG00000045038	1056.11210610878	1.85071247459088	Prkce
ENSMUSG00000090272	101.634737752609	3.17502743373624	Mndal
ENSMUSG00000024140	1913.72514378576	-1.66203010579375	Epas1
ENSMUSG00000022544	1120.01026640801	0.677873804642062	Eef2kmt
ENSMUSG00000041360	3513.23391304861	0.653130162589675	Pum3
ENSMUSG00000059824	5515.549523986	-1.27238456352105	Dbp
ENSMUSG00000036528	1262.98431805359	-1.31785591558944	Ppfibp2
ENSMUSG00000022324	1098.90640023465	-1.14439706994569	Matn2
ENSMUSG00000038510	842.320140202021	0.64597360905588	Rpf2
ENSMUSG00000003814	27556.498671829	0.980288880970178	Calr
ENSMUSG00000004931	2208.08590391784	0.551831878182992	Apba3
ENSMUSG00000040026	49.9242025866185	4.89834612387781	Saa3
ENSMUSG00000030609	1510.30739497613	0.860140797782087	Aen
ENSMUSG00000062991	472.337319063644	2.18976433676711	Nrg1
ENSMUSG00000071369	1123.11755868386	0.974428672990199	Map3k5
ENSMUSG00000018537	1917.09309991915	-0.662082197048163	Pcgf2
ENSMUSG00000031757	11387.1700960173	-1.8428353248895	Mt4
ENSMUSG00000024501	2258.80148785096	-1.44498086115355	Dpysl3
ENSMUSG00000021223	610.223896159455	-1.97291478958318	Papln
ENSMUSG00000001441	10306.3417205648	0.63867279775687	Npepps
ENSMUSG00000067194	5424.81981854491	0.480519475830282	Eif1ax
ENSMUSG00000016256	495.703470402487	1.96292509727631	Ctsz
ENSMUSG00000001674	2027.56712823328	0.632120880967379	Ddx18
ENSMUSG00000038065	280.354142914488	-1.40369793036101	Mturn
ENSMUSG00000028480	69.375882065096	3.59223361458828	Glipr2
ENSMUSG00000000555	1177.05902872868	2.24233067257098	Itga5
ENSMUSG00000028949	440.257926955701	1.86062126614787	Smarcd3
ENSMUSG00000027405	6162.2403065067	0.650014044283549	Nop56
ENSMUSG00000026586	127.283487549366	2.61880574978947	Prrx1
ENSMUSG00000058799	5663.7390419635	0.852880607427493	Nap1l1
ENSMUSG00000040557	337.727897060366	-1.17085452294144	Mettl27
ENSMUSG00000022407	2213.52171915014	0.618335482827754	Adsl
ENSMUSG00000003546	644.320724683582	-0.655822557427377	Klc4
ENSMUSG00000059108	69.4606876326572	4.09376341515285	Ifitm6
ENSMUSG00000021371	3225.10755687192	-1.05569675411541	Mcur1
ENSMUSG00000037325	277.210787488153	-0.956533386738216	Bbs7
ENSMUSG00000005360	264.931232068477	1.19827256551645	Slc1a3
ENSMUSG00000034156	227.464053207102	-1.30554139883224	Tspoap1
ENSMUSG00000036718	613.543026148369	-0.837791293234234	Micall2
ENSMUSG00000063873	998.517068708804	-1.5154926315768	Slc24a3
ENSMUSG00000031432	877.288009839065	0.730110963499074	Prps1
ENSMUSG00000072620	483.670971642938	4.94105635650129	Slfn2
ENSMUSG00000055629	185.466398776772	1.83208027460236	B4galnt4
ENSMUSG00000038116	997.909560581533	-0.798202041387773	Phf20
ENSMUSG00000024736	1587.84075575519	-0.876111032259893	Tmem132a
ENSMUSG00000022551	5122.29863084123	0.526127647686533	Cyc1
ENSMUSG00000024683	787.94808543477	0.582095780089057	Mrpl16
ENSMUSG00000048007	236.666306866223	0.90057471473939	Timm8a1
ENSMUSG00000053801	1540.80690107846	0.929497972604582	Grwd1
ENSMUSG00000060376	2369.07293180982	-0.689848627277644	Bckdha
ENSMUSG00000038991	3396.35338771312	0.740618889951281	Txndc5
ENSMUSG00000100546	34.3707486888368	4.48280583184008	NA
ENSMUSG00000057766	485.540298107162	-1.02224426770668	Ankrd29
ENSMUSG00000073489	296.418866715776	6.00450970127292	Ifi204
ENSMUSG00000026914	3450.40164724898	0.456586504443741	Psmd14
ENSMUSG00000033220	186.062861485283	3.18325332258232	Rac2
ENSMUSG00000022391	10336.2060805482	0.617253843650249	Rangap1
ENSMUSG00000020891	164.296644272719	2.42259380999034	Alox8
ENSMUSG00000005378	1545.98713862525	0.569367779847324	Bud23
ENSMUSG00000029147	4024.49347736904	0.628015621558065	Ppm1g
ENSMUSG00000033880	262.166387069983	2.36891519542393	Lgals3bp
ENSMUSG00000029246	651.000477364478	0.866924984886665	Ppat
ENSMUSG00000027068	135.330977320113	2.43357063218618	Dhrs9
ENSMUSG00000025473	3575.59017770315	2.25470333284449	Adam8
ENSMUSG00000031910	1024.33202328849	1.86778488237968	Has3
ENSMUSG00000032690	189.347421934796	4.06292434325901	Oas2
ENSMUSG00000038236	1706.09839867447	-0.771773483464703	Hoxa7
ENSMUSG00000037016	919.938930046551	-2.03934963385357	Frem2
ENSMUSG00000005338	133.714325807488	2.88374297700353	Cadm3
ENSMUSG00000024431	4179.68215402552	-0.654139748353167	Nr3c1
ENSMUSG00000009633	182.295995732593	5.83289382567299	G0s2
ENSMUSG00000021116	4362.01757074456	0.730706791188595	Eif2s1
ENSMUSG00000022325	569.396249297026	0.94437745199259	Pop1
ENSMUSG00000031628	1479.38186747136	0.938531220767283	Casp3
ENSMUSG00000020864	2467.087597065	-0.48093043322375	Ankrd40
ENSMUSG00000042265	498.687995110596	7.58280035126931	Trem1
ENSMUSG00000039787	260.861163426172	-1.58274656312346	Cercam
ENSMUSG00000034422	581.567916236818	2.15126267122074	Parp14
ENSMUSG00000042659	1752.95497739138	0.991914993645485	Arrdc4
ENSMUSG00000029063	5356.07071432696	0.553891174552802	Nadk
ENSMUSG00000020381	199.942502553468	-1.19316027714262	Mrnip
ENSMUSG00000052942	33.5189601733638	2.86132928779804	Glis3
ENSMUSG00000000290	351.976961990091	2.81254381555106	Itgb2
ENSMUSG00000009292	62.289440469513	4.26996037807344	Trpm2
ENSMUSG00000032936	89.0557891911182	-1.66428114274996	Camkv
ENSMUSG00000027656	49.6452096667847	2.62208469998241	Ccn5
ENSMUSG00000022894	172.075546136171	1.71740659102606	Adamts5
ENSMUSG00000034858	842.779080868178	-1.15555496489474	Fam214a
ENSMUSG00000024066	7062.88186221804	1.40640924410913	Xdh
ENSMUSG00000038279	2852.27222328135	0.728831709472841	Nop2
ENSMUSG00000024026	5444.11187266193	0.863050968680711	Glo1
ENSMUSG00000022822	4522.27475141765	-0.990032727315568	Abcc5
ENSMUSG00000042660	1193.94126172691	0.875894964344883	Wdr55
ENSMUSG00000043557	460.824925613479	-1.65209830385566	Mdga1
ENSMUSG00000033209	324.06505397954	-1.87157113656128	Ttc28
ENSMUSG00000015714	748.412271098227	1.46566689762114	Cers2
ENSMUSG00000087516	83.4912366884417	-2.7213170680774	AW549542
ENSMUSG00000053175	2522.2214073606	2.20891781316452	Bcl3
ENSMUSG00000106734	72.4381457541298	3.01644472525066	NA
ENSMUSG00000005481	5240.71720068648	0.717502521261324	Ddx39
ENSMUSG00000021876	4911.7632366856	-0.602685758246569	Rnase4
ENSMUSG00000029154	2561.26417886379	0.822250364150255	Cwh43
ENSMUSG00000030222	83.4241926226464	-2.304508441318	Rerg
ENSMUSG00000057963	1208.79726148029	1.10822191310382	Itpk1
ENSMUSG00000058057	157.275608753635	-1.37636665077005	Mettl7a3
ENSMUSG00000060594	21.0703088820528	4.29484425617323	Layn
ENSMUSG00000023021	2722.40222524362	-0.603925723220159	Cers5
ENSMUSG00000031273	2003.73337387023	-1.5152786951166	Col4a6
ENSMUSG00000024039	680.369642056741	-1.34662281658777	Cbs
ENSMUSG00000068328	3896.97376812123	0.458384788885792	Aup1
ENSMUSG00000004105	1775.63202882599	-1.64041757101666	Angptl2
ENSMUSG00000020099	1204.30479222634	-0.806186401117011	Unc5b
ENSMUSG00000032135	579.307113190926	1.62074509158655	Mcam
ENSMUSG00000031834	5825.21809360286	-0.772243534124606	Pik3r2
ENSMUSG00000038175	1858.93294128916	-0.801628797659081	Mylip
ENSMUSG00000040811	3640.94202974034	-0.536173782899166	Eml2
ENSMUSG00000026645	1480.98096797642	-2.10501901659993	Olah
ENSMUSG00000020368	12808.8489236368	0.557764530024718	Canx
ENSMUSG00000046186	12560.8826872848	-0.846390666633322	Cd109
ENSMUSG00000002325	1890.99002414037	0.975276985475927	Irf9
ENSMUSG00000028883	58.8886965401191	3.30840727572111	Sema3a
ENSMUSG00000031841	2963.53810792895	-1.14711675527103	Cdh13
ENSMUSG00000021180	196.659085316228	-1.02658765923511	Rps6ka5
ENSMUSG00000037788	2892.02327949174	-0.508880667034465	Vopp1
ENSMUSG00000039450	420.460924865522	-0.861640138912845	Dcxr
ENSMUSG00000045475	79.4740993187624	2.97703502634325	Lce3c
ENSMUSG00000078713	1453.51121722208	0.790241620135053	Tomm5
ENSMUSG00000079419	56.1002808883919	4.52119428480911	Ms4a6c
ENSMUSG00000034981	249.153670588702	2.20521698334278	Parm1
ENSMUSG00000020388	2346.9845199295	-1.31806049489948	Pdlim4
ENSMUSG00000020785	3101.34676732706	-1.22009381085194	Camkk1
ENSMUSG00000032089	226.355620116926	2.46196394024566	Il10ra
ENSMUSG00000042303	664.455951669302	0.696936721186336	Sgsm3
ENSMUSG00000030056	665.50238490399	0.604003142703657	Isy1
ENSMUSG00000037679	5297.88772328605	-0.438125638657828	Inf2
ENSMUSG00000002395	3889.94428724505	-0.509838947883592	Use1
ENSMUSG00000026664	932.135497294999	1.24053029710365	Phyh
ENSMUSG00000043079	742.8014429498	1.3984181155655	Synpo
ENSMUSG00000023041	18313.927811655	5.5161930373791	Krt6b
ENSMUSG00000026657	990.288061368298	-0.804738269460735	Frmd4a
ENSMUSG00000028369	28.9218136090458	3.04041046414243	Svep1
ENSMUSG00000029438	1223.64451410619	-0.541425294051705	Bcl7a
ENSMUSG00000021792	4640.32655366217	-1.45940410401423	Prxl2a
ENSMUSG00000025351	3312.41156039617	0.822458334196765	Cd63
ENSMUSG00000053338	36.6457329175191	6.61140462275595	Tarm1
ENSMUSG00000036067	183.574692296764	3.06951662688597	Slc2a6
ENSMUSG00000029330	4863.29021044559	-0.828811017594247	Cds1
ENSMUSG00000033294	2467.72337632018	0.822017443216462	Noc4l
ENSMUSG00000029430	10340.6783518557	0.654882420867133	Ran
ENSMUSG00000023913	215.587315217432	2.80295259661308	Pla2g7
ENSMUSG00000025324	932.077165793703	1.26975631047878	Atp10a
ENSMUSG00000078652	6718.46936927897	0.486351990644169	Psme3
ENSMUSG00000022876	233.982561493308	3.57780157726739	Samsn1
ENSMUSG00000025584	722.494694413653	-1.10418662166956	Pde8a
ENSMUSG00000038067	46.5137064191341	3.9177628346509	Csf3
ENSMUSG00000022686	33.4447881563563	3.67706684900374	B3gnt5
ENSMUSG00000032376	2396.82495500843	-0.528232625704372	Usp3
ENSMUSG00000054958	57.7158035208809	4.37706404629559	Nt5c1a
ENSMUSG00000030695	23826.8488690363	0.700164499807266	Aldoa
ENSMUSG00000034687	253.874872585476	-2.00591620585176	Fras1
ENSMUSG00000030107	118.258622280834	3.15187917026052	Usp18
ENSMUSG00000026411	568.667826786849	-0.730854535922993	Tmem9
ENSMUSG00000020706	5047.01335601425	0.635398594621237	Ftsj3
ENSMUSG00000078812	46243.1947314832	0.640128089453587	Eif5a
ENSMUSG00000028654	5187.43610490009	-1.30674449341358	Mycl
ENSMUSG00000022234	12869.2233648486	0.567746063054148	Cct5
ENSMUSG00000040033	2204.35155217912	1.34970983308395	Stat2
ENSMUSG00000054146	22442.9696543302	-1.34857786719068	Krt15
ENSMUSG00000025465	3724.85426981796	-0.620010217059982	Echs1
ENSMUSG00000060950	981.176053529198	1.03704505424252	Trmt61a
ENSMUSG00000038539	4062.25082952017	0.929117060424779	Atf5
ENSMUSG00000059883	1158.19640139771	0.847192405731455	Irak4
ENSMUSG00000031214	670.051624409067	-1.19765352469997	Ophn1
ENSMUSG00000040028	2898.43193839647	0.46702944002374	Elavl1
ENSMUSG00000087659	29.0026709962254	4.0583014916304	NA
ENSMUSG00000058427	1823.43686361314	3.28251156355803	Cxcl2
ENSMUSG00000042784	85.0777190171997	1.61404639803396	Muc1
ENSMUSG00000034127	223.716382439656	1.76812025986652	Tspan8
ENSMUSG00000038637	305.372306001938	-1.11726188972823	Lrrc56
ENSMUSG00000068245	345.781868167476	2.13416109590823	Phf11d
ENSMUSG00000006403	59.2064003677057	2.9544003029076	Adamts4
ENSMUSG00000004270	2720.69082672366	0.713360632869914	Lpcat3
ENSMUSG00000045193	2616.32953423439	-1.24907518654963	Cirbp
ENSMUSG00000056209	2466.4696963135	0.784210146761493	Npm3
ENSMUSG00000057113	25612.3594293088	0.575129889353367	Npm1
ENSMUSG00000038260	2185.04160309442	-0.615319401383697	Trpm4
ENSMUSG00000097178	100.319750108672	-1.73009378133167	2310002F09Rik
ENSMUSG00000020363	179.637447513455	2.96842793468795	Gfpt2
ENSMUSG00000040253	91.0806438670117	3.0735229059414	Gbp7
ENSMUSG00000022555	1647.07230454171	1.11012672580928	Dgat1
ENSMUSG00000013662	3648.20989380414	0.498256603251536	Atad1
ENSMUSG00000047409	2951.20716035747	-0.492856075487276	Ctdspl
ENSMUSG00000020547	2864.72871117513	0.481773781551056	Bzw2
ENSMUSG00000015176	5747.39094986557	0.631595836655501	Nolc1
ENSMUSG00000038587	73.4390324133236	2.1575063217241	Akap12
ENSMUSG00000021614	268.123352660855	3.75907888359596	Vcan
ENSMUSG00000017969	138.737273917371	4.85725882639533	Ptgis
ENSMUSG00000048310	898.28944439214	-0.807213677449151	Pskh1
ENSMUSG00000022503	1377.81458987121	0.49157095085532	Nubp1
ENSMUSG00000050092	81.6856226345927	3.58510693417117	Sprr2b
ENSMUSG00000009418	1286.32023773728	1.33472978638219	Nav1
ENSMUSG00000001794	6127.23575333883	0.941868415194136	Capns1
ENSMUSG00000051557	1482.53871608048	0.592057646498008	Pusl1
ENSMUSG00000093489	29.4207102828771	4.71320083345141	NA
ENSMUSG00000073982	1792.14950523752	0.929859159825673	Rhog
ENSMUSG00000029166	2048.23762250657	-0.642137280778842	Mapre3
ENSMUSG00000072941	267.343079469791	3.76148701254451	Sod3
ENSMUSG00000003484	169.912185997602	5.62246079116397	Cyp4f18
ENSMUSG00000030298	3342.29479206621	0.470755543661744	Sec13
ENSMUSG00000034271	254.196578885322	2.21637392469025	Jdp2
ENSMUSG00000028261	686.560954074136	0.798292067106178	Ndufaf4
ENSMUSG00000021238	1497.16152084176	-0.953034338912022	Aldh6a1
ENSMUSG00000041324	44.5543024640152	4.43344041655355	Inhba
ENSMUSG00000070034	73.9937056206578	3.26575227911231	Sp110
ENSMUSG00000026946	279.02358757612	1.55196964932048	Nmi
ENSMUSG00000044768	1001.44468682556	0.726535484922178	D1Ertd622e
ENSMUSG00000051098	440.372712124599	-0.803796238436441	Mblac2
ENSMUSG00000026806	615.668641695899	0.793396724070784	Ddx31
ENSMUSG00000091537	2127.55594714768	0.593952737809258	Tma7
ENSMUSG00000024308	4530.6466520538	0.74540552934728	Tapbp
ENSMUSG00000057133	2314.51452083174	-0.706529034418912	Chd6
ENSMUSG00000048332	68.9859681392398	2.37325447394093	Lhfp
ENSMUSG00000005103	10582.718174364	0.775729158659595	Wdr1
ENSMUSG00000079014	498.692722359593	1.55628088556906	Serpina3i
ENSMUSG00000030401	332.647723988842	-1.10980518643567	Rtn2
ENSMUSG00000027551	801.13315392643	-0.565098404560954	Zfp64
ENSMUSG00000052160	59.4758447541383	3.36263188731682	Pld4
ENSMUSG00000028173	4116.26633378675	-0.635241052925441	Wls
ENSMUSG00000003283	89.9289419795521	2.76113556481403	Hck
ENSMUSG00000024376	1019.71475891853	0.708324249999746	Epb41l4a
ENSMUSG00000030786	190.266674035628	2.27149816286055	Itgam
ENSMUSG00000045136	815.344685952124	1.71831697185105	Tubb2b
ENSMUSG00000071528	2152.16139574825	0.56256598221669	Atp5md
ENSMUSG00000041827	151.662657653056	6.18091087563825	Oasl1
ENSMUSG00000053746	654.636489633184	1.43471270403978	Ptrh1
ENSMUSG00000041147	922.850782391926	0.849301517548998	Brca2
ENSMUSG00000039620	123.525651833143	-1.29815634119251	Trmt9b
ENSMUSG00000028919	1730.79297424153	-0.849744101684209	Arhgef19
ENSMUSG00000073418	64.1560827418353	2.39323725289041	C4b
ENSMUSG00000023032	769.006957782635	1.2672141638688	Slc4a8
ENSMUSG00000030474	45.735695702364	3.12483100646367	Siglece
ENSMUSG00000053964	611.352155797031	-0.870279540763355	Lgals4
ENSMUSG00000062070	6620.3785430754	1.05270021387448	Pgk1
ENSMUSG00000042501	28.3065139946848	-2.86715456438195	Cpa6
ENSMUSG00000030142	898.840011425599	6.49430075497142	Clec4e
ENSMUSG00000063229	25944.0372059779	0.893674903419931	Ldha
ENSMUSG00000032679	665.453496779066	-0.959318149785286	Cd59a
ENSMUSG00000030983	2721.47734928837	0.564379577724924	Bccip
ENSMUSG00000027401	19496.4055851345	-1.06281173064517	Tgm3
ENSMUSG00000026176	4537.96090978748	-0.384925392154752	Ctdsp1
ENSMUSG00000028953	4778.70057708626	0.579894524058306	Abcf2
ENSMUSG00000027889	1945.69219670716	0.711433003228921	Ampd2
ENSMUSG00000023070	253.778666791656	-2.37427000477458	Rgn
ENSMUSG00000059326	678.073418835471	1.73588859490032	Csf2ra
ENSMUSG00000027993	1646.17205423137	-0.935800677369428	Trim2
ENSMUSG00000050373	1619.77130821118	-0.951151495561231	Snx21
ENSMUSG00000079426	3805.72170507633	0.481206995719005	Arpc4
ENSMUSG00000060703	34.9088682525181	2.66574253805907	Cd302
ENSMUSG00000031672	6923.77161020329	0.601945079624465	Got2
ENSMUSG00000058586	2638.85191405846	-0.920400211204407	Serhl
ENSMUSG00000031451	13309.5667041266	-0.585085989108092	Gas6
ENSMUSG00000008373	2450.04132201671	0.708071619449735	Prpf31
ENSMUSG00000022126	2075.44956656296	7.11773434045114	Acod1
ENSMUSG00000018848	3382.64716421502	0.498895768405605	Rars
ENSMUSG00000001120	393.016775089639	1.11451625276948	Pcbp3
ENSMUSG00000021133	3872.61894868298	0.822014422612017	Susd6
ENSMUSG00000053931	1167.0648047161	1.2288480014974	Cnn3
ENSMUSG00000014226	3088.21170069279	0.792092882563236	Cacybp
ENSMUSG00000028757	4700.4461013956	0.522853450233369	Ddost
ENSMUSG00000032307	3678.23374912057	0.674024740922788	Ube2q2
ENSMUSG00000002984	4115.34723599691	0.649431554976676	Tomm40
ENSMUSG00000018566	249.558898014002	-1.53359744900831	Slc2a4
ENSMUSG00000029231	220.572549138659	3.81385045924237	Pdgfra
ENSMUSG00000038618	1884.03659824608	-0.683157030188625	Rassf7
ENSMUSG00000022774	2057.88316902443	0.578515713443497	Ncbp2
ENSMUSG00000022199	752.024093150108	-0.785623764620371	Slc22a17
ENSMUSG00000026473	4631.36397210722	-1.08908106380662	Glul
ENSMUSG00000001440	11872.3045954072	0.446118667615682	Kpnb1
ENSMUSG00000020238	3462.50676355434	0.6781823923747	Ncln
ENSMUSG00000035004	126.893536343488	5.18834150053268	Igsf6
ENSMUSG00000046879	226.595292837771	2.00223867873957	Irgm1
ENSMUSG00000002111	345.708846767206	1.86339436477513	Spi1
ENSMUSG00000034435	3257.39095482823	-0.585776919503896	Tmem30b
ENSMUSG00000046805	278.396944324677	4.85295246763916	Mpeg1
ENSMUSG00000056076	14951.023107557	0.540836771503282	Eif3b
ENSMUSG00000021360	3205.85823229434	0.928145662987996	Gcnt2
ENSMUSG00000068893	32.2718592485599	4.69130913822486	Sprr2a2
ENSMUSG00000028111	71.3712686311858	2.65561978454758	Ctsk
ENSMUSG00000026127	2596.71421214807	0.530389312725483	Imp4
ENSMUSG00000010554	1673.26026695091	0.568204485069399	Mettl16
ENSMUSG00000024339	2271.97517789876	1.0878372336763	Tap2
ENSMUSG00000024587	6831.97629585441	0.602741377852868	Nars
ENSMUSG00000031168	3173.3600682264	0.815560815950962	Ebp
ENSMUSG00000003808	2566.39370289361	0.613806939540648	Farsa
ENSMUSG00000006724	93.1184994712395	2.01761745158236	Cyp27b1
ENSMUSG00000001288	14422.0704076324	-0.700795351243387	Rarg
ENSMUSG00000035095	3061.49327365743	1.54091227677693	Fam167a
ENSMUSG00000002409	699.538636345654	-0.745244357838051	Dyrk1b
ENSMUSG00000022561	3566.47055346436	0.62704377439058	Gpaa1
ENSMUSG00000027637	3437.52697344428	0.449796576428212	Rab5if
ENSMUSG00000025128	33.9162968964218	5.4229895689208	Bhlhe22
ENSMUSG00000030144	513.23039112345	6.92805767430519	Clec4d
ENSMUSG00000056529	311.365209005748	5.09239449957888	Ptafr
ENSMUSG00000005824	56.9120758430542	4.07733833313676	Tnfsf14
ENSMUSG00000112023	1423.59371246232	5.55429475120733	Lilr4b
ENSMUSG00000035783	381.817567344682	2.38537068385587	Acta2
ENSMUSG00000046768	217.651728899244	1.24162486564938	Rhoj
ENSMUSG00000017221	8747.72612223434	0.522774832433275	Psmd3
ENSMUSG00000075122	52.8122501163388	3.07922379446527	Cd80
ENSMUSG00000013974	99.0851458075274	6.85273595295771	Mcemp1
ENSMUSG00000054404	180.796833219529	3.80180502450559	Slfn5
ENSMUSG00000022146	2420.46632679725	1.0362909950865	Osmr
ENSMUSG00000027246	85.8197930765588	-1.9004827344021	Ell3
ENSMUSG00000025196	62.1462772913925	2.20328644475732	Cpn1
ENSMUSG00000030157	998.052564880606	1.2037495463019	Clec2d
ENSMUSG00000048285	4604.87446798299	-0.5288399350171	Frmd6
ENSMUSG00000070031	101.452478858052	3.52398757419284	Sp140
ENSMUSG00000060791	58.7365059385574	3.54414184615483	Gmfg
ENSMUSG00000034245	1271.15944024541	-0.658035182018997	Hdac11
ENSMUSG00000004846	1671.24324698282	1.02400815766195	Plod3
ENSMUSG00000058392	1782.6292072309	0.803095814251205	Rrp1b
ENSMUSG00000028849	10113.8977715412	0.981700537657687	Map7d1
ENSMUSG00000029326	997.038539317025	0.584385565009174	Enoph1
ENSMUSG00000074896	188.156061072666	7.1970265151863	Ifit3
ENSMUSG00000035049	2451.3643909644	0.88932761601497	Rrp12
ENSMUSG00000020120	1413.58269948905	4.08913747153435	Plek
ENSMUSG00000034161	144.729913482118	-1.82605764102526	Scx
ENSMUSG00000000693	28.4026162964349	2.97255473398815	Loxl3
ENSMUSG00000054619	5164.06759417489	-1.0934375026126	Mettl7a1
ENSMUSG00000033467	440.975445631468	0.899586014101696	Crlf2
ENSMUSG00000069581	173.816733896712	-2.43046092586857	Tspear
ENSMUSG00000024613	3462.91337869099	0.529344715183902	Tcof1
ENSMUSG00000033227	315.67639017442	-1.46484033340061	Wnt6
ENSMUSG00000039252	53.9172125717446	3.62144992943346	Lgi2
ENSMUSG00000037104	889.26507817828	0.835403395039563	Socs5
ENSMUSG00000024011	360.136311445314	2.10224952828437	Pi16
ENSMUSG00000032294	43319.3868037472	0.752290019774757	Pkm
ENSMUSG00000060548	4162.96954349525	-1.01160052574114	Tnfrsf19
ENSMUSG00000064090	890.196909463679	-0.608089546348277	Vrk2
ENSMUSG00000031722	196.330742849128	7.27002696176411	Hp
ENSMUSG00000024620	46.0167629925821	2.76756266551145	Pdgfrb
ENSMUSG00000052749	72.0237552821513	5.71936940770256	Trim30b
ENSMUSG00000026696	1668.97832352386	0.806524045500282	Vamp4
ENSMUSG00000013584	17.8710517130116	4.167097811505	Aldh1a2
ENSMUSG00000032548	3011.33816352149	1.2788172185916	Slco2a1
ENSMUSG00000046574	4418.93768789581	-0.685591535832985	Prr12
ENSMUSG00000025464	903.042550333201	-0.695884483780517	Paox
ENSMUSG00000028874	158.371144267147	2.99441226420288	Fgr
ENSMUSG00000028811	2683.50489077447	0.745725131886285	Yars
ENSMUSG00000027804	2889.05808747058	0.87014395483667	Ppid
ENSMUSG00000048027	1700.23679161977	-0.682349746735543	Rgmb
ENSMUSG00000052914	3080.27834005291	-0.953155823835705	Cyp2j6
ENSMUSG00000041459	11013.8145266354	0.543688892763807	Tardbp
ENSMUSG00000087439	28.1921803902877	3.09507570108697	NA
ENSMUSG00000029471	863.656505619444	0.774004878435746	Camkk2
ENSMUSG00000041096	982.404410928876	-0.628263846187277	Tspyl2
ENSMUSG00000039031	864.011206324071	-0.763395107884378	Arhgap18
ENSMUSG00000022124	3420.14268416646	-0.559283152193691	Fbxl3
ENSMUSG00000020676	57.5790319245524	2.78670251571366	Ccl11
ENSMUSG00000026234	39481.264746369	0.495983125530113	Ncl
ENSMUSG00000032374	73.0860545183613	1.77351466869892	Plod2
ENSMUSG00000078853	100.946094753558	2.42046358596861	Igtp
ENSMUSG00000039096	392.050355721403	-0.791665750256354	Rsad1
ENSMUSG00000027298	4756.6729078448	1.09576939400981	Tyro3
ENSMUSG00000030094	1344.05130246652	-0.625665755600316	Xpc
ENSMUSG00000032562	8618.9843713908	0.454009854978206	Gnai2
ENSMUSG00000028617	2088.73269040111	0.634985157677909	Lrrc42
ENSMUSG00000031647	2644.38823546299	-1.18230100607979	Mfap3l
ENSMUSG00000035944	653.618312428465	-0.732348481558164	Ttc38
ENSMUSG00000063802	1611.10364722978	0.729127628081076	Hspbp1
ENSMUSG00000048120	354.07798358153	5.24729679813825	Entpd1
ENSMUSG00000029594	1245.19384194375	0.712993901098709	Rbm19
ENSMUSG00000078429	9968.07868902854	-0.654865521383883	Ctdsp2
ENSMUSG00000058672	5759.01659237041	1.187890662868	Tubb2a
ENSMUSG00000047115	312.568553203379	-1.11947361050287	Fam221a
ENSMUSG00000009248	200.229845070375	-1.44100875797807	Ascl2
ENSMUSG00000029999	1151.52296700381	1.78133894888007	Tgfa
ENSMUSG00000028932	4091.79019138353	0.344180997542283	Psmc2
ENSMUSG00000023367	485.235983938207	1.11569618623131	Tmem176a
ENSMUSG00000023915	2421.96089747875	0.813233014653209	Tnfrsf21
ENSMUSG00000032377	1371.9957115445	-1.34993711620223	Plscr4
ENSMUSG00000020844	4883.40794386441	-0.467959463307288	Nxn
ENSMUSG00000014873	1664.56363880474	0.628070213090634	Surf2
ENSMUSG00000023143	769.115631575955	0.62475082705844	Nagpa
ENSMUSG00000020883	1765.24657285897	-0.817356873466373	Fbxl20
ENSMUSG00000024338	381.033233163629	1.76272000773255	Psmb8
ENSMUSG00000047221	366.337292299342	0.897081290187459	Fam185a
ENSMUSG00000007888	1653.03722990083	-0.947970223321925	Crlf1
ENSMUSG00000062604	3983.00664144397	-0.491912271769327	Srpk2
ENSMUSG00000057666	24451.7466435229	0.612804351442455	Gapdh
ENSMUSG00000026159	3956.43986693229	0.568945682268959	Agfg1
ENSMUSG00000028121	748.574581940051	0.988804670022868	Bcar3
ENSMUSG00000029659	61.9635454045254	2.29898354423833	Medag
ENSMUSG00000025355	194.969610019192	4.09251258552379	Mmp19
ENSMUSG00000032009	865.733061339655	-0.818784277514265	Sesn3
ENSMUSG00000004771	6246.07847204605	0.687182365524109	Rab11a
ENSMUSG00000052212	23.7906486251768	5.59110638476398	Cd177
ENSMUSG00000001473	3126.29096296946	1.75834750340039	Tubb6
ENSMUSG00000004393	2458.52235584194	0.550025026712025	Ddx56
ENSMUSG00000018171	2791.74225793077	1.16104551785621	Vmp1
ENSMUSG00000070003	1579.34177807686	0.886995705879312	Ssbp4
ENSMUSG00000028270	375.748795968714	3.83046732190618	Gbp2
ENSMUSG00000083282	1095.00056504729	-0.587469521409803	Ctsf
ENSMUSG00000105504	28.3680427231944	3.8823303466626	Gbp5
ENSMUSG00000031605	941.680276365108	0.602858808465586	Klhl2
ENSMUSG00000029321	565.330565826411	1.65958407364957	Slc10a6
ENSMUSG00000032534	1335.5914819055	-0.437180813969324	Cep63
ENSMUSG00000017057	14086.933581762	0.712637573711313	Il13ra1
ENSMUSG00000041530	4170.03683586574	-0.574661628514818	Ago1
ENSMUSG00000038822	2041.68127736755	-0.703205323730674	Hace1
ENSMUSG00000037138	876.302381109243	-1.03726066432275	Aff3
ENSMUSG00000027808	5917.16024829117	0.710598062402996	Serp1
ENSMUSG00000021198	153.330885483908	-1.45124014478151	Unc79
ENSMUSG00000039081	1901.79795795094	-0.664312738716461	Zfp503
ENSMUSG00000046203	48.7137784258505	3.01635838272626	Sprr2g
ENSMUSG00000024169	939.286644628428	-0.658400987882234	Ift140
ENSMUSG00000046223	1038.80955574323	2.12766584115248	Plaur
ENSMUSG00000055723	656.798439500018	0.807790693157891	Rras2
ENSMUSG00000056270	120.541542075919	1.75664597974718	Prr9
ENSMUSG00000034343	1387.17111682504	0.560756584417996	Ube2f
ENSMUSG00000087138	78.191060802252	-1.37619277853431	Gm15545
ENSMUSG00000049709	860.987087691341	-1.38378826048623	Nlrp10
ENSMUSG00000035967	3398.79073325907	-1.07260102107306	Ints6l
ENSMUSG00000031149	113.821311793703	1.51041795965336	Praf2
ENSMUSG00000032327	122.105805439144	-1.64498909217575	Stra6
ENSMUSG00000049553	2500.92819973468	0.699238756594221	Polr1a
ENSMUSG00000054342	63.3401033015507	2.35935105136903	Kcnn4
ENSMUSG00000033845	1520.96712546994	0.592116936404731	Mrpl15
ENSMUSG00000054263	1068.03193953621	-1.15079487008571	Lifr
ENSMUSG00000059005	21008.7157983587	0.51190672370115	Hnrnpa3
ENSMUSG00000074749	493.33002575871	-0.946548349725836	Kiz
ENSMUSG00000002017	1300.80598973707	0.749696604338283	Fam98a
ENSMUSG00000030187	29.7850360218532	7.35504051430807	Klra2
ENSMUSG00000021182	1959.75731070491	-1.19290161439252	Ccdc88c
ENSMUSG00000031024	1054.84528847258	0.95437703771688	St5
ENSMUSG00000029153	1050.8530180965	-0.84523600373286	Ociad2
ENSMUSG00000034321	1096.41398936859	0.643754959596811	Exosc1
ENSMUSG00000029714	3059.75512038295	-0.544401928653316	Gigyf1
ENSMUSG00000021990	189.564632443425	2.48701507076335	Spata13
ENSMUSG00000033777	78.6783816231297	5.250190382672	Tlr13
ENSMUSG00000050721	544.738854577665	1.55551925706563	Plekho2
ENSMUSG00000020307	2236.95263632962	0.452399453866436	Cdc34
ENSMUSG00000044646	2844.26105639562	-0.772047850555914	Zbtb7c
ENSMUSG00000039713	2466.72700920858	-0.667010292278601	Plekhg5
ENSMUSG00000022367	226.416026391048	2.38612281304173	Has2
ENSMUSG00000027566	5318.64704909595	0.449098139951767	Psma7
ENSMUSG00000008575	7110.66221398331	-0.544932920273941	Nfib
ENSMUSG00000015932	39005.8017326514	0.615914652341769	Dstn
ENSMUSG00000058818	189.977929859501	3.54454642659344	Pirb
ENSMUSG00000020936	3383.63379089753	0.296520279441786	Nmt1
ENSMUSG00000047798	208.604246619417	6.64811534804293	Cd300lf
ENSMUSG00000027533	40937.6704420418	1.25862642779889	Fabp5
ENSMUSG00000100017	213.354481423761	-1.00911502389919	2410022M11Rik
ENSMUSG00000027248	20266.8540895553	0.635707800905096	Pdia3
ENSMUSG00000036902	98.2585488405297	1.21628571706674	Neto2
ENSMUSG00000052430	39.0662185000726	2.05287027578682	Bmpr1b
ENSMUSG00000018677	3743.17117894883	0.490122395910953	Slc25a39
ENSMUSG00000037490	489.53051483816	-0.746760016999477	Slc2a12
ENSMUSG00000054766	11491.0996171432	0.589067655675888	Set
ENSMUSG00000058290	1245.1250519845	-0.790049306285693	Espl1
ENSMUSG00000053399	45.4240339887835	-2.93662851482132	Adamts18
ENSMUSG00000003378	254.70625550229	-0.894803121407026	Grik5
ENSMUSG00000019173	12646.7985874735	0.541903583353608	Rab5c
ENSMUSG00000054720	56.3266548291711	2.20020707166047	Lrrc8c
ENSMUSG00000032434	5609.8305332442	0.648125576375328	Cmtm6
ENSMUSG00000034055	239.116888871563	-1.06823366713894	Phka1
ENSMUSG00000040265	73.2390127742067	-1.55053473390889	Dnm3
ENSMUSG00000063727	47.4447221094501	1.99798184056045	Tnfrsf11b
ENSMUSG00000021702	299.542972648758	4.55674627689915	Thbs4
ENSMUSG00000037306	693.834972302964	-1.27395209511742	Man1c1
ENSMUSG00000039183	1680.46731785714	0.558317798206181	Nubp2
ENSMUSG00000029769	138.139245802218	-1.47140583023272	Ccdc136
ENSMUSG00000019944	341.085020742242	-1.19766509665315	Rhobtb1
ENSMUSG00000074677	21.3751686593067	5.85817111172562	Sirpb1c
ENSMUSG00000078532	33.9858690718255	2.10159593223839	Nkain1
ENSMUSG00000028318	752.804364284825	0.607502431139717	Polr1e
ENSMUSG00000041126	1439.32178615984	-0.940278876712164	H2afv
ENSMUSG00000045427	3272.64430276453	0.47660858879364	Hnrnph2
ENSMUSG00000060591	2562.14096696334	0.92792525525357	Ifitm2
ENSMUSG00000024966	6267.47938169044	0.542636221699939	Stip1
ENSMUSG00000027435	119.185697400217	2.96399009437673	Cd93
ENSMUSG00000034203	631.742881824635	1.09444408482067	Chchd4
ENSMUSG00000057719	2642.55193123529	-1.00534385620512	Sh3rf2
ENSMUSG00000001305	1236.67498024548	0.808484147024902	Rrp15
ENSMUSG00000062203	6887.03946807221	0.552863699873281	Gspt1
ENSMUSG00000040747	524.632233584624	3.07353741521363	Cd53
ENSMUSG00000030062	7539.96809497897	0.607819156263722	Rpn1
ENSMUSG00000024771	46.7442873819883	2.40764182746903	Lipk
ENSMUSG00000006179	164.820695373457	1.06209013032361	Prss16
ENSMUSG00000032735	260.523687371806	-1.20682679828517	Ablim3
ENSMUSG00000005397	226.556249394275	2.50248087286029	Nid1
ENSMUSG00000047986	45.3115396852788	-2.19954464541802	Palm3
ENSMUSG00000013483	1993.32593094228	1.38777672140257	Card14
ENSMUSG00000027995	510.728173467444	2.78028281720487	Tlr2
ENSMUSG00000020839	104.269580814844	1.971066426335	Tmigd1
ENSMUSG00000021097	142.7079244445	-1.30199368651457	Clmn
ENSMUSG00000056131	615.37080536755	0.664183686636816	Pgm3
ENSMUSG00000074129	1138.35294413139	0.742485346143624	Rpl13a
ENSMUSG00000020075	8814.47612028523	0.691974694398401	Ddx21
ENSMUSG00000061048	4808.57506326461	0.943501803683903	Cdh3
ENSMUSG00000005087	24861.4514480674	0.805652772264473	Cd44
ENSMUSG00000050244	2629.07859435673	0.915980966916431	Heatr1
ENSMUSG00000023068	2532.33428203268	0.636724069960774	Nus1
ENSMUSG00000000861	2267.52699735472	-0.655945850032426	Bcl11a
ENSMUSG00000019188	3859.69523791405	0.594994048793235	H13
ENSMUSG00000024845	5235.96573359709	-0.522430307881818	Tmem134
ENSMUSG00000057497	999.801044707574	0.764220250890429	Fam136a
ENSMUSG00000024675	49.0046939910755	6.48451278793298	Ms4a4c
ENSMUSG00000004056	5156.72166236714	0.336201263614081	Akt2
ENSMUSG00000078348	2061.51887146927	0.667474625738453	Sf3b5
ENSMUSG00000045763	351.878545229702	2.91655842763623	Basp1
ENSMUSG00000032231	73312.2800079546	0.590038813214263	Anxa2
ENSMUSG00000028937	232.575990994569	1.20131279480122	Acot7
ENSMUSG00000032017	61.4000740957922	-2.75676197414179	Grik4
ENSMUSG00000061950	4130.37902293797	0.698544194166591	Ppp4r1
ENSMUSG00000038351	2156.08244483611	-0.930578422127605	Sgsm2
ENSMUSG00000024883	3825.14836328103	1.07188595673436	Rin1
ENSMUSG00000032860	89.1335720660581	2.04842829428338	P2ry2
ENSMUSG00000052557	5010.74260583779	-1.1368094640259	Gan
ENSMUSG00000070639	1335.49423763088	-0.647858649209862	Lrrc8b
ENSMUSG00000029868	529.579110583843	-0.998295260137988	Trpv6
ENSMUSG00000023262	679.343394466795	0.637043153378592	Acy1
ENSMUSG00000002997	369.364553231008	-1.0851659164078	Prkar2b
ENSMUSG00000016529	59.7599123080406	4.09412575019452	Il10
ENSMUSG00000111229	49.7954625525799	2.31772919653745	NA
ENSMUSG00000005846	4493.37454391952	0.489911037516344	Rsl1d1
ENSMUSG00000057181	600.98830536984	-0.627171729176078	5730455P16Rik
ENSMUSG00000034042	3005.09871836108	-0.414173538245358	Gpbp1l1
ENSMUSG00000025189	115.390269065892	-1.37210015891923	Cnnm1
ENSMUSG00000021069	1743.75197409941	-0.662998065083508	Pygl
ENSMUSG00000029209	709.903077951603	-0.648023651838031	Gnpda2
ENSMUSG00000021215	14676.9390220271	-0.49290194771947	Net1
ENSMUSG00000060739	5897.70331586614	-0.387366753005626	Nsa2
ENSMUSG00000042628	937.515418753246	-0.620753392243782	Zfyve1
ENSMUSG00000022843	746.920059640531	-0.716109513722596	Clcn2
ENSMUSG00000020866	68.1112525057719	-1.50136189185329	Cacna1g
ENSMUSG00000030045	1147.22166565343	0.501142532213884	Mrpl19
ENSMUSG00000085315	101.655160542506	-1.25153938497257	NA
ENSMUSG00000062908	2567.70115055304	-0.750509122285271	Acadm
ENSMUSG00000025591	783.397310029063	0.676144005526259	Tma16
ENSMUSG00000028799	1301.223113442	-0.631362216805507	Zfp362
ENSMUSG00000044408	5492.04851763509	-0.712087476631681	Sptssa
ENSMUSG00000025026	1660.35362834936	-0.743055891557406	Add3
ENSMUSG00000000563	7351.23976282904	0.420068960428319	Atp5pb
ENSMUSG00000037905	1184.48088039162	0.715794981634265	Bri3bp
ENSMUSG00000030760	2487.18919887387	-0.655457972180322	Acer3
ENSMUSG00000079227	69.6095237201942	4.91282821465252	Ccr5
ENSMUSG00000049957	1083.20564695942	0.76222180451343	Ccdc137
ENSMUSG00000039640	2603.46246664202	0.823535570478404	Mrpl12
ENSMUSG00000021583	1811.67178819051	0.973516741638468	Erap1
ENSMUSG00000028413	4531.73934044659	0.642151646374688	B4galt1
ENSMUSG00000073491	18.8089875129721	4.84313091063283	Ifi213
ENSMUSG00000020464	1852.3152063822	0.642609769781245	Pnpt1
ENSMUSG00000067297	25.874545039041	8.45145540437299	Ifit1bl2
ENSMUSG00000079563	51.1462333079068	3.00570683589714	Pglyrp2
ENSMUSG00000031444	107.33055101889	7.31041980784341	F10
ENSMUSG00000044162	32.296731987012	2.67050258893754	Tnip3
ENSMUSG00000022792	649.574005882839	0.599865116342217	Yars2
ENSMUSG00000059923	2899.37072285391	0.323770065751054	Grb2
ENSMUSG00000028488	513.734696655988	-1.50889342111706	Sh3gl2
ENSMUSG00000029468	532.373697849451	-0.892131318414982	P2rx7
ENSMUSG00000021737	3410.30339399984	0.382089563949468	Psmd6
ENSMUSG00000038967	392.342063335046	-0.784036295333014	Pdk2
ENSMUSG00000027613	10597.7300158516	0.583108137923302	Eif6
ENSMUSG00000006699	11909.4955912981	0.27718121913065	Cdc42
ENSMUSG00000028957	1665.51687935107	-0.894732144188009	Per3
ENSMUSG00000048277	6006.85386966978	0.647538575366439	Syngr2
ENSMUSG00000019471	8552.06718016386	0.41002321402066	Cdc37
ENSMUSG00000028656	12735.8196266085	0.720740076022384	Cap1
ENSMUSG00000024921	3000.89043569588	-0.642980326275715	Smarca2
ENSMUSG00000025017	281.572691755472	3.78175250456118	Pik3ap1
ENSMUSG00000017929	261.334742768733	1.98457954716469	B4galt5
ENSMUSG00000061665	7800.82304699865	0.588190588046775	Cd2ap
ENSMUSG00000040254	1952.37069022734	-2.43129888430703	Sema3d
ENSMUSG00000031657	2013.44738838122	0.536665638665148	Heatr3
ENSMUSG00000079604	157.6656993166	-1.31446015932965	Gm13219
ENSMUSG00000060445	25.8946020400075	6.04632652330399	Sycp2
ENSMUSG00000031870	72.7415152310539	-2.05097793375784	Pgr
ENSMUSG00000030691	564.326061879455	-0.679498597965047	Fchsd2
ENSMUSG00000030557	8548.40638177887	-0.82425002599188	Mef2a
ENSMUSG00000040327	421.779676443247	-1.10371022803725	Cul9
ENSMUSG00000050896	26.1917158471528	3.01085676382389	Rtn4rl2
ENSMUSG00000035704	779.625056151831	0.69108264814536	Alg8
ENSMUSG00000045679	1311.51424644032	-0.673155962125551	Pqlc3
ENSMUSG00000085786	650.295297886302	0.783634581976432	NA
ENSMUSG00000000386	54.9350383429029	3.52396748664674	Mx1
ENSMUSG00000028860	5682.28004385813	-1.02667124389541	Sytl1
ENSMUSG00000038776	1968.99250964491	-0.879687939265683	Ephx1
ENSMUSG00000022403	4667.95699203716	0.430802605704212	St13
ENSMUSG00000017386	743.842216037204	0.849712360450659	Traf4
ENSMUSG00000021905	1231.3023388966	0.602305659723522	Dph3
ENSMUSG00000022841	7335.68545138751	0.418471982278275	Ap2m1
ENSMUSG00000042228	245.28886941874	2.36685803288262	Lyn
ENSMUSG00000031879	798.521656529846	0.610642619820883	Ciao2b
ENSMUSG00000026177	247.32091098505	5.25049454271239	Slc11a1
ENSMUSG00000063286	218.549785598279	3.58736949581608	Gm8995
ENSMUSG00000039676	60.8874011878525	-1.77910467047266	Capsl
ENSMUSG00000025158	2517.84514902546	0.806113572287564	Rfng
ENSMUSG00000028978	85.7475796552622	2.26776336286934	Nos3
ENSMUSG00000025268	342.313228012242	-0.790403565250506	Maged2
ENSMUSG00000040728	18063.2563759571	-0.810601440672456	Esrp1
ENSMUSG00000000982	207.783602371378	4.95732106508987	Ccl3
ENSMUSG00000036104	2145.92124016936	-0.469279777793378	Rab3gap1
ENSMUSG00000029378	708.073532658731	1.41958353782432	Areg
ENSMUSG00000039765	848.018798533814	-0.683615864965268	Cc2d2a
ENSMUSG00000034459	240.853105598848	5.83846994758482	Ifit1
ENSMUSG00000042251	120.977369433257	-1.33911575696823	Pm20d1
ENSMUSG00000059714	1965.37730742455	0.577039858727577	Flot1
ENSMUSG00000083012	1738.8150239664	0.397914516757591	Fam220a
ENSMUSG00000003762	1195.24904617969	0.503835726517305	Coq8b
ENSMUSG00000026000	4645.44105710594	-0.549545630984775	Lancl1
ENSMUSG00000009585	66.7792407603127	2.44175490893832	Apobec3
ENSMUSG00000034795	519.691703141209	-0.85442793841946	Ccdc122
ENSMUSG00000049811	67.1630857928157	-1.44022541157493	Fam161a
ENSMUSG00000073599	173.7956298193	2.48809186666128	Ecscr
ENSMUSG00000058248	2623.69058887868	1.58133477784417	Kcnh1
ENSMUSG00000043510	262.662641011311	-0.796315037313857	Hscb
ENSMUSG00000024948	1538.76145470989	-0.742262044642216	Map4k2
ENSMUSG00000005034	1877.69340496613	-0.593706294844299	Prkacb
ENSMUSG00000047810	265.096094223206	2.26346920246022	Ccdc88b
ENSMUSG00000056413	64.4022221249451	1.82541323529875	Adap1
ENSMUSG00000043439	1288.33124451586	0.779589478648369	Epop
ENSMUSG00000025869	2151.12858157541	0.772910918315083	Nop16
ENSMUSG00000100627	24.129022592217	-2.8671285923528	NA
ENSMUSG00000086212	40.7673409360785	-2.47788712311766	Mkln1os
ENSMUSG00000024785	1229.05648699983	0.48862208858462	Rcl1
ENSMUSG00000029175	2146.12231968129	0.765909970102468	Slc35f6
ENSMUSG00000021607	1269.63003476603	0.469751871073941	Mrpl36
ENSMUSG00000056201	28904.3055119346	0.702432673633065	Cfl1
ENSMUSG00000004100	2869.93022825386	0.603176145152188	Ppan
ENSMUSG00000078784	1546.81622803239	0.545128969222668	Rbis
ENSMUSG00000051498	20.5532523547074	4.82677738407825	Tlr6
ENSMUSG00000027774	2224.4960410453	0.429229382520975	Gfm1
ENSMUSG00000027078	162.505568303171	2.04556031986522	Ube2l6
ENSMUSG00000106894	84.6302436258848	-1.67049359842928	NA
ENSMUSG00000036078	3121.99689018209	0.618632345143848	Sigmar1
ENSMUSG00000040550	1958.18409448925	0.352178614785225	Otud6b
ENSMUSG00000022443	26852.0649541769	0.808071275009322	Myh9
ENSMUSG00000024379	202.677637763603	1.78709384438449	Tslp
ENSMUSG00000028599	1014.48213743144	2.60490332610536	Tnfrsf1b
ENSMUSG00000037971	404.103523174966	-0.68745892618325	1110032A03Rik
ENSMUSG00000062373	7819.62646575443	-0.591387204105235	Tmem65
ENSMUSG00000031504	313.539930626159	1.47475197447674	Rab20
ENSMUSG00000037415	2441.16276433885	-0.744355636587262	Ranbp10
ENSMUSG00000016496	319.024226659987	2.07225167613325	Cd274
ENSMUSG00000057278	1811.33125893478	0.675883871157542	Snrpg
ENSMUSG00000028186	137.084667165054	4.70627480122949	Uox
ENSMUSG00000033721	3350.40306374448	0.436931521349761	Vav3
ENSMUSG00000074238	4757.1794817585	0.553907360614925	Ap1ar
ENSMUSG00000029915	66.4147171038852	3.67529296798345	Clec5a
ENSMUSG00000010048	3265.88995192232	0.60710359973451	Ifrd2
ENSMUSG00000029322	100.308296741475	5.31985423743642	Plac8
ENSMUSG00000028862	2954.27611290791	0.800252386321644	Map3k6
ENSMUSG00000053289	1711.08135445182	0.473074322021599	Ddx10
ENSMUSG00000060510	3005.81874687275	-0.646147422327671	Zfp266
ENSMUSG00000002803	680.100908133416	-0.542028106696393	Btbd6
ENSMUSG00000049858	644.694251346835	-0.757094704931538	Suox
ENSMUSG00000020873	2086.15191788152	0.581948820173908	Slc35b1
ENSMUSG00000019849	4371.72485696943	0.591167981933244	Prep
ENSMUSG00000017715	5634.3581313639	0.656596500624926	Pgs1
ENSMUSG00000056260	599.927685467674	-0.659946054035004	Lrif1
ENSMUSG00000017428	3661.49340072111	0.431189933409193	Psmd11
ENSMUSG00000032204	318.191851367647	0.834167397034153	Aqp9
ENSMUSG00000022108	47241.2377229136	-0.613216228862498	Itm2b
ENSMUSG00000038481	2183.49621318724	-0.436571213091732	Cdk19
ENSMUSG00000014867	6525.28669412314	0.370763982842344	Surf4
ENSMUSG00000024669	255.116893320832	-0.84630482016829	Cd5
ENSMUSG00000036285	1681.70060077553	0.703447494459917	Noa1
ENSMUSG00000029472	9728.49148831785	-0.350942651055763	Anapc5
ENSMUSG00000021712	606.781914507168	-0.568442724217282	Trim23
ENSMUSG00000022971	454.090443157067	0.940967286848498	Ifnar2
ENSMUSG00000003868	1785.72096636242	0.731745704398328	Ruvbl2
ENSMUSG00000038965	3891.19914751687	0.405453047047654	Ube2l3
ENSMUSG00000049971	757.502800475396	0.892856770448284	Glt1d1
ENSMUSG00000034845	133.949697696871	2.29790868569049	Plvap
ENSMUSG00000031337	790.246855205781	-0.66716348064444	Mtm1
ENSMUSG00000102051	15.3409397322757	5.63855580871315	Ly6a2
ENSMUSG00000032557	2220.78728849795	0.470074433418425	Uba5
ENSMUSG00000017631	3592.33713884957	-0.751870920458823	Abr
ENSMUSG00000063317	1288.99817980921	0.705193343522633	Usp31
ENSMUSG00000032267	558.560896164539	-0.650474676882756	Usp28
ENSMUSG00000037275	1752.68457119108	0.585647751154416	Gemin5
ENSMUSG00000029066	1828.47441579606	0.519098579974318	Mrpl20
ENSMUSG00000023951	3286.76824258412	1.17560251693228	Vegfa
ENSMUSG00000024164	507.782428831413	3.10711949167005	C3
ENSMUSG00000020105	2542.80264837296	-0.747693399835993	Lrig3
ENSMUSG00000040354	3229.13252167677	0.420449155004424	Mars
ENSMUSG00000028745	9727.99139293542	0.405947110960515	Capzb
ENSMUSG00000025059	1220.22666942541	0.725742614589995	Gk
ENSMUSG00000025645	375.337906517428	0.965554821768942	Ccdc51
ENSMUSG00000035439	739.851660438131	0.696223398134158	Haus8
ENSMUSG00000043866	3786.29896146227	0.486796289257364	Taf10
ENSMUSG00000055546	27.293044108668	3.56739849072452	Timd4
ENSMUSG00000028729	3455.39816260953	0.681938037929217	Ebna1bp2
ENSMUSG00000017639	1863.82584449096	-1.00173191144846	Rab11fip4
ENSMUSG00000045362	35.409094585595	3.9001484250748	Tnfrsf26
ENSMUSG00000003235	4210.20888539946	0.459689841497367	Eif2b5
ENSMUSG00000021830	434.435550808075	-1.151637232575	Txndc16
ENSMUSG00000027962	47.0574084823302	2.00498867337404	Vcam1
ENSMUSG00000042148	883.064557585767	0.533585704259177	Cox10
ENSMUSG00000073414	137.704281008433	-1.56863604474673	Mpig6b
ENSMUSG00000074743	6857.56469091786	0.862764985240404	Thbd
ENSMUSG00000054676	486.299692507758	0.832065274757766	1600014C10Rik
ENSMUSG00000022723	1051.27461360093	-0.801490426709493	Crybg3
ENSMUSG00000027215	2079.94166407316	-0.791973394172487	Cd82
ENSMUSG00000035969	134.066309171741	1.8668587470304	Rusc2
ENSMUSG00000038425	416.863924586968	-0.624032617436882	Poli
ENSMUSG00000030967	2603.63684295804	-0.413727239825608	Zranb1
ENSMUSG00000059027	24.7663811603663	-2.53587026678084	NA
ENSMUSG00000061024	2187.32514099364	0.626662370083451	Rrs1
ENSMUSG00000066456	545.782957181934	-0.718846874187644	Hmgn3
ENSMUSG00000032641	147.643684026746	-0.863310410236699	Gpr19
ENSMUSG00000028859	548.719114920902	6.60178439058784	Csf3r
ENSMUSG00000038936	241.733584812623	-1.00358203224049	Sccpdh
ENSMUSG00000052180	450.246998859804	1.80087791360083	Serpinb6c
ENSMUSG00000019590	3922.57589475446	0.633672888941182	Cyb561
ENSMUSG00000005813	2342.22117912246	0.526977076687365	Metap1
ENSMUSG00000078451	94.1908013998357	-2.22618739951498	Ppil6
ENSMUSG00000020692	1417.58062197424	0.594176972572513	Nle1
ENSMUSG00000032575	3152.58940269944	0.898091943746699	Manf
ENSMUSG00000025044	73.879334614418	4.90908584028606	Msr1
ENSMUSG00000024952	5238.37711265213	0.49611441701407	Rps6ka4
ENSMUSG00000034165	2875.5237617297	0.806369378908014	Ccnd3
ENSMUSG00000003992	2135.41118052635	-0.386644520570427	Ssbp2
ENSMUSG00000031954	2875.31544955775	0.502144142150723	Cfdp1
ENSMUSG00000103588	51.4582966789804	3.66573387166204	NA
ENSMUSG00000029701	3298.0152045299	0.508404792605377	Rbm28
ENSMUSG00000031538	271.666143857179	1.34415200982454	Plat
ENSMUSG00000021068	1422.50655834749	-0.860459667644476	Nin
ENSMUSG00000058569	4982.91340943068	0.522867424960068	Tmed9
ENSMUSG00000005514	3316.72627227556	0.887198407099706	Por
ENSMUSG00000022206	357.659547751347	-1.26149397130918	Npr3
ENSMUSG00000049502	542.954608678381	1.15654434545154	Dtx3l
ENSMUSG00000019179	8946.96526257046	0.503512184938424	Mdh2
ENSMUSG00000082674	78.0522574528119	-1.23783768199042	NA
ENSMUSG00000004665	5081.86273303158	0.760802284284519	Cnn2
ENSMUSG00000036006	91.7589203874963	3.03052324077357	Ripor2
ENSMUSG00000022150	160.561772351753	2.09250974718294	Dab2
ENSMUSG00000037966	1165.07403601294	0.879326954707034	Ninj1
ENSMUSG00000020211	3390.19824370222	0.463369432234545	Sf3a2
ENSMUSG00000034035	328.905226121374	-0.781759599064749	Ccdc17
ENSMUSG00000049555	127.494962530391	-1.22712737158669	Tmie
ENSMUSG00000024936	725.858367351875	-0.853898797299916	Kcnk7
ENSMUSG00000000530	396.307732531708	1.10823939487006	Acvrl1
ENSMUSG00000047735	323.995753695167	1.94683523258537	Samd9l
ENSMUSG00000042254	53.7048028196159	2.20629352041626	Cilp
ENSMUSG00000024404	5671.06204802621	0.442991121704305	Riok3
ENSMUSG00000034109	4416.0285514386	-0.527545931474986	Golim4
ENSMUSG00000035227	3282.50109248752	0.560507010839692	Spcs2
ENSMUSG00000075700	4734.34514197298	0.321140223594292	Selenot
ENSMUSG00000022913	915.215123584088	0.561628681625289	Psmg1
ENSMUSG00000037235	5929.50768893262	-0.725418572252242	Mxd4
ENSMUSG00000079478	798.498242558913	0.557526737932011	Znrd2
ENSMUSG00000037872	36.2233070734655	3.06780003370827	Ackr1
ENSMUSG00000005107	135.41808302298	-1.30163669177468	Slc2a9
ENSMUSG00000080927	78.6380148275849	4.65749750102406	NA
ENSMUSG00000018927	366.312766193754	3.23984849929778	Ccl6
ENSMUSG00000043154	4128.69481774283	-1.01891152111162	Ppp2r3a
ENSMUSG00000062210	2425.4772691635	-0.585894246806197	Tnfaip8
ENSMUSG00000045414	1670.74785937173	-0.567212880143377	Dipk2a
ENSMUSG00000017756	1970.74985189753	1.13960938147524	Slc12a7
ENSMUSG00000055254	1229.59251697415	-1.37030722604014	Ntrk2
ENSMUSG00000035373	230.550943000545	3.69852137009808	Ccl7
ENSMUSG00000024150	1691.73294695986	0.637350648034899	Mcfd2
ENSMUSG00000048458	854.907168348953	-0.793696001598192	Inka2
ENSMUSG00000058135	2995.05260861914	-0.735282457834028	Gstm1
ENSMUSG00000035112	273.890372613497	-1.04605597328885	Wnk4
ENSMUSG00000051910	1232.58311849403	-1.57423046191711	Sox6
ENSMUSG00000033632	490.90355139316	-0.589420408798174	AW554918
ENSMUSG00000025571	2324.95046335345	-0.628618702472817	Tnrc6c
ENSMUSG00000022752	3150.44558319646	0.426368020730009	Tomm70a
ENSMUSG00000035941	1852.22470352301	0.455190218439249	Ibtk
ENSMUSG00000097779	24.021675169445	4.46581858187338	NA
ENSMUSG00000033629	2803.85832046374	0.455872394262251	Hacd3
ENSMUSG00000055322	3084.48030413823	-1.2113399172757	Tns1
ENSMUSG00000028430	4185.98867554396	0.478536428767265	Nol6
ENSMUSG00000039005	59.9356538230461	2.2513410349906	Tlr4
ENSMUSG00000020048	13885.0499570327	0.852018597210815	Hsp90b1
ENSMUSG00000055980	373.310537045898	-0.778299849286698	Irs1
ENSMUSG00000028965	324.753322312864	1.85529191403426	Tnfrsf9
ENSMUSG00000020747	2920.00756281219	-0.55676590818177	Tmem94
ENSMUSG00000058355	5700.015940242	0.580409754952269	Abce1
ENSMUSG00000016757	2823.6103024696	0.523341559605949	Ttll12
ENSMUSG00000031781	1503.30453919317	0.626930203288756	Ciapin1
ENSMUSG00000029304	250.225343191109	5.59222591458985	Spp1
ENSMUSG00000034792	1568.15411601407	-0.579729747443468	Gna15
ENSMUSG00000021285	949.398174335952	-0.617550658190028	Ppp1r13b
ENSMUSG00000024999	1462.65577840992	0.688512446981677	Noc3l
ENSMUSG00000070780	665.508402681848	0.648121212880911	Rbm47
ENSMUSG00000039601	28.0010406358509	3.04938736238556	Rcan2
ENSMUSG00000026565	865.389770527832	-0.522561279136518	Pou2f1
ENSMUSG00000063888	3371.82184380739	0.490922137235474	Rpl7l1
ENSMUSG00000039660	1373.82698066055	0.55634087790896	Spout1
ENSMUSG00000026574	148.97097520113	2.01128817197109	Dpt
ENSMUSG00000041632	1200.74252808975	0.435665687276875	Mrps27
ENSMUSG00000032590	1403.27336932507	0.537547186182408	Apeh
ENSMUSG00000062859	33.3091960787717	-2.01397178042201	Tcp11
ENSMUSG00000043017	23.1468118178886	2.6586263069299	Ptgir
ENSMUSG00000002222	4455.166019247	-0.529286571848856	Rmnd5a
ENSMUSG00000049699	253.00091542894	-1.30953041576047	Ucn2
ENSMUSG00000037613	161.123532198846	2.23582101870722	Tnfrsf23
ENSMUSG00000063239	112.633778415944	-1.97707166522325	Grm4
ENSMUSG00000001891	3590.28214683399	0.459199473820887	Ugp2
ENSMUSG00000024248	5279.06738795342	-0.497773491857731	Cox7a2l
ENSMUSG00000020312	16.0034408643981	2.95010784568476	Shc2
ENSMUSG00000108814	13.6389815856959	7.08123992446012	NA
ENSMUSG00000041355	3966.89926495496	0.593333720918084	Ssr2
ENSMUSG00000071847	1431.88671365087	-1.11573706305824	Apcdd1
ENSMUSG00000025500	176.997583488251	-0.89899882976474	Lmntd2
ENSMUSG00000035615	512.893929519473	-0.954891453571438	Frmpd1
ENSMUSG00000061533	652.724511857484	1.06850149143191	Cep128
ENSMUSG00000040040	734.469484365587	-0.556698427000273	Ift88
ENSMUSG00000073601	54.7486950992288	4.38285069171093	Serpinb3c
ENSMUSG00000038332	1595.01861613944	-0.809185825105183	Sesn1
ENSMUSG00000046865	4633.05536137066	0.67767836996469	Fbl
ENSMUSG00000078716	229.113008318741	-0.943456360315633	Tmem8b
ENSMUSG00000006731	1180.62339654625	0.963407772479332	B4galnt1
ENSMUSG00000009097	2618.72424455263	-0.722672219036812	Tbx1
ENSMUSG00000022500	5704.65095625687	0.848624122221201	Litaf
ENSMUSG00000021604	1761.09953432563	-1.15442846136912	Irx4
ENSMUSG00000038352	66.0084132056567	2.21921432722448	Arl5c
ENSMUSG00000005981	4769.50246582437	0.415680946372424	Trap1
ENSMUSG00000091811	1652.11043643519	-0.862014984474527	Inafm1
ENSMUSG00000052419	1606.10662313493	0.600057832030798	2610001J05Rik
ENSMUSG00000027597	1950.84672814482	0.840326543353134	Ahcy
ENSMUSG00000028683	993.956206981613	0.557130883430803	Eif2b3
ENSMUSG00000022707	573.827497394509	-0.59212041712458	Gbe1
ENSMUSG00000028089	1080.9046612736	-0.458963704425118	Chd1l
ENSMUSG00000092920	19.865747810087	5.40408674928795	NA
ENSMUSG00000058498	38.0370261205818	2.08346904172081	Rnf207
ENSMUSG00000023947	503.906734559207	1.98783611332478	Nfkbie
ENSMUSG00000031232	1906.46450925903	0.584702560531904	Magt1
ENSMUSG00000025804	302.181520273945	5.76818094092345	Ccr1
ENSMUSG00000016319	20167.5765209365	0.285019083176399	Slc25a5
ENSMUSG00000005057	212.606273624175	2.47474255136975	Sh2b2
ENSMUSG00000060261	6611.68802089531	-0.534614396262094	Gtf2i
ENSMUSG00000003534	15639.7425035552	-0.488402332083283	Ddr1
ENSMUSG00000040432	1613.41102955925	0.888913125555483	Ltb4r2
ENSMUSG00000004791	189.807771870549	2.20625835577932	Pgf
ENSMUSG00000039461	887.507708067725	-0.698274520043004	Tcta
ENSMUSG00000016528	5174.14058945502	0.57138221043558	Mapkapk2
ENSMUSG00000026785	673.297842891602	-0.644987567164354	Pkn3
ENSMUSG00000044017	82.5286306794305	2.46531102835335	Adgrd1
ENSMUSG00000041438	1904.89504852395	0.684222598713053	Utp4
ENSMUSG00000036561	894.46155221343	-0.538338128999018	Ppp6r2
ENSMUSG00000024678	14.6608873615231	4.14942167543318	Ms4a4d
ENSMUSG00000021066	241.547602936877	1.72686511868378	Atl1
ENSMUSG00000041592	263.47257520628	-1.49234667126267	Sdk2
ENSMUSG00000006304	13059.682767869	0.25696230783855	Arpc2
ENSMUSG00000056305	1576.09629665675	0.450081187963176	Usp39
ENSMUSG00000030087	94.3216980003373	-1.3051410681085	Klf15
ENSMUSG00000057191	44.6823809782594	3.2575732616135	AB124611
ENSMUSG00000029710	2918.39148136582	-0.452974531475425	Ephb4
ENSMUSG00000063480	2899.11326380166	0.595496700344449	Snu13
ENSMUSG00000057530	10820.9624946429	0.534553323770082	Ece1
ENSMUSG00000074272	31.8350782658049	3.04089934677151	Ceacam1
ENSMUSG00000053835	26.2674024774193	4.1042652508403	H2-T24
ENSMUSG00000040549	3256.99717889621	-0.577182210483888	Ckap5
ENSMUSG00000034762	21.2707652403542	3.33682208643417	Glis1
ENSMUSG00000036850	1042.47978510628	0.575861997041392	Mrpl41
ENSMUSG00000035042	23.0048279304429	3.3890273978492	Ccl5
ENSMUSG00000009185	14.8753564575921	4.8986145144772	Ccl8
ENSMUSG00000018446	3897.58586136732	0.610498122845538	C1qbp
ENSMUSG00000040274	2994.15975138361	0.612152021451627	Cdk6
ENSMUSG00000003154	2402.01611910457	-0.460996070353497	Foxj2
ENSMUSG00000027947	5744.21569508556	-0.736511522886816	Il6ra
ENSMUSG00000002885	369.7223044868	1.68584831888944	Adgre5
ENSMUSG00000071068	23.233750827818	5.06294506263315	Treml2
ENSMUSG00000005968	5427.96632160349	-0.715574338658554	Tuft1
ENSMUSG00000068742	2750.23457355307	-0.707016358109208	Cry2
ENSMUSG00000002031	1032.23926378338	-0.730329560462159	Ift46
ENSMUSG00000021298	325.388652710367	2.08705196519224	Gpr132
ENSMUSG00000020407	122.762183891974	2.38771244211607	Upp1
ENSMUSG00000073386	15.2001678902274	7.70537878760551	9830107B12Rik
ENSMUSG00000018930	131.180071538559	4.88019508254651	Ccl4
ENSMUSG00000028759	7692.07115163046	-0.376308562667045	Hp1bp3
ENSMUSG00000029036	3491.9718483124	0.53088775888051	Atad3a
ENSMUSG00000028330	3934.56876847302	0.408412455398839	Ncbp1
ENSMUSG00000023467	31.4756753553769	-2.09483633574348	Tulp2
ENSMUSG00000019990	26.6907394816715	3.84530810069694	Pde7b
ENSMUSG00000047881	4326.73388635229	-0.562683496304954	Rell1
ENSMUSG00000003037	3439.55791265395	0.392358819192991	Rab8a
ENSMUSG00000032116	4725.16300143374	0.471521447877368	Stt3a
ENSMUSG00000006050	2149.73292811878	0.449807230152622	Sra1
ENSMUSG00000018293	16410.5849680895	0.563006447354276	Pfn1
ENSMUSG00000096727	242.899238516872	1.4694015852707	Psmb9
ENSMUSG00000028452	13841.8329449457	0.302565213248761	Vcp
ENSMUSG00000002343	583.733050445532	0.925958094255602	Armc6
ENSMUSG00000097617	17.6893915219194	4.65798901592817	NA
ENSMUSG00000059657	37.8843278147826	5.78674148495091	Stfa2
ENSMUSG00000033545	3059.50221958192	-0.540322526884536	Znrf1
ENSMUSG00000074141	51.3745027949952	2.04145343550305	Il4i1
ENSMUSG00000074818	34.7303809285293	-1.89991120708004	Pdzd7
ENSMUSG00000020899	1525.79778043178	0.494517198394075	Pfas
ENSMUSG00000003227	75.585550854856	-1.84934004757032	Edar
ENSMUSG00000021756	6994.44126942803	0.934620830805204	Il6st
ENSMUSG00000022358	840.261989872923	-1.20701438330498	Fbxo32
ENSMUSG00000035505	439.620833795581	0.574070379249904	Cox18
ENSMUSG00000027994	347.041385088704	0.886694773160798	Mcub
ENSMUSG00000031805	273.108473689607	1.34741318424748	Jak3
ENSMUSG00000072893	420.703831465351	-0.7047075625254	4933439C10Rik
ENSMUSG00000022892	21127.4923292185	-0.563920627749537	App
ENSMUSG00000054770	634.743465352516	-0.521119867353755	Kctd18
ENSMUSG00000037722	462.477985234853	0.670378749169351	Gnpnat1
ENSMUSG00000003234	1917.24444740199	0.390027067863838	Abcf3
ENSMUSG00000049988	78.800124348952	4.40311020538006	Lrrc25
ENSMUSG00000033952	957.296287466833	-1.03023443112338	Aspm
ENSMUSG00000090222	21.2533994099077	3.27893985987271	NA
ENSMUSG00000090722	94.4601321265455	1.55607288194577	NA
ENSMUSG00000052516	399.210388229632	-1.34307800926192	Robo2
ENSMUSG00000054555	19.3639141707154	4.00703460591274	Adam12
ENSMUSG00000026083	5991.40865093813	0.327694811871859	Eif5b
ENSMUSG00000030116	173.43144561541	3.5461689959059	Mfap5
ENSMUSG00000026544	85.0530767471052	-1.26776922560706	Dusp23
ENSMUSG00000020424	845.505596516945	-0.492078113481455	Castor1
ENSMUSG00000045639	789.266524979572	-0.628383797021362	Zfp629
ENSMUSG00000023980	1023.13831053021	-0.421500400183046	Taf8
ENSMUSG00000022788	656.274674647346	-0.585375591612722	Fgd4
ENSMUSG00000026456	1294.64769737098	0.736872403924501	Cyb5r1
ENSMUSG00000056602	1618.07841590496	-0.665447961686299	Fry
ENSMUSG00000047264	385.817111039565	-0.876156470496707	Zfp358
ENSMUSG00000020838	852.821606504114	-0.876227702173467	Slc6a4
ENSMUSG00000024583	2857.83932384914	0.430349447745806	Txnl1
ENSMUSG00000003033	1583.40509776556	0.528495013596301	Ap1m1
ENSMUSG00000097754	15.9269416590381	7.76708797678901	Ptgs2os2
ENSMUSG00000078763	84.7304181497251	8.1371996073836	Slfn1
ENSMUSG00000030662	7623.84561855801	0.401576016898432	Ipo5
ENSMUSG00000055762	9151.66946730582	0.604966527865491	Eef1d
ENSMUSG00000068856	2802.26920289463	0.529649493189859	Sf3b4
ENSMUSG00000040907	19.6864510735805	3.73045709423484	Atp1a3
ENSMUSG00000018697	1626.92473484078	0.529475200471341	Aatf
ENSMUSG00000024238	183.769568063781	1.58245412081895	Zeb1
ENSMUSG00000000125	2215.17094135787	-0.741839740413394	Wnt3
ENSMUSG00000022831	241.197537940963	2.26094582624172	Hcls1
ENSMUSG00000049090	1769.74484555554	-0.553442883166118	Zadh2
ENSMUSG00000042271	738.058366399193	-0.593580661754347	Nxt2
ENSMUSG00000021877	5809.14513159854	0.529944425377792	Arf4
ENSMUSG00000025558	2906.66308281063	0.594197426003268	Dock9
ENSMUSG00000016524	15.8086524863867	4.03632732839763	Il19
ENSMUSG00000037890	299.048526541636	-0.910500202040581	Wdr19
ENSMUSG00000027236	2271.81243147066	0.515202166350517	Eif3j1
ENSMUSG00000021079	742.803233221148	0.737037488416536	Timm9
ENSMUSG00000026603	1533.97505958266	0.629295707148082	Smyd2
ENSMUSG00000022186	7955.81730996114	-0.707346253436371	Oxct1
ENSMUSG00000021550	1721.23740852932	0.536747626098529	2210016F16Rik
ENSMUSG00000067235	64.5939407291281	6.22489352235733	H2-Q10
ENSMUSG00000097164	248.30980893432	-1.11260729807131	NA
ENSMUSG00000063160	837.852246493906	-0.971352975129325	Numbl
ENSMUSG00000012519	179.297518696887	1.27504876463217	Mlkl
ENSMUSG00000108591	320.267021929197	-0.826270088723356	Particl
ENSMUSG00000007030	67.4973162235331	-1.40706531047957	Vwa7
ENSMUSG00000064127	4228.84276623176	-0.804741071620335	Med14
ENSMUSG00000049103	92.5304903092468	4.05702327088201	Ccr2
ENSMUSG00000043953	545.345087402328	3.90073184904232	Ccrl2
ENSMUSG00000040212	253.433690392846	1.45310791792272	Emp3
ENSMUSG00000001901	21.9273372243506	-3.16107264024369	Kcnh6
ENSMUSG00000058444	979.746294336648	-0.371539754045839	Map2k5
ENSMUSG00000028542	5596.93728889755	-0.621498762791421	Slc6a9
ENSMUSG00000001750	2225.74906645617	0.629265166288188	Tcirg1
ENSMUSG00000105155	41.3795556337804	-3.02976686341762	NA
ENSMUSG00000029552	821.769851524759	0.890337955736746	Tes
ENSMUSG00000033213	12.6389575801461	4.39899405827739	AA467197
ENSMUSG00000099812	54.0346546071296	1.44510947712689	NA
ENSMUSG00000027611	389.154015398183	1.88395775342004	Procr
ENSMUSG00000031171	1003.87946296694	0.522036976404111	Ftsj1
ENSMUSG00000001018	1438.91607716543	-0.514579219370931	Snapin
ENSMUSG00000030826	1988.66865220272	-0.630732230116329	Bcat2
ENSMUSG00000026003	1778.82903082451	0.868102822613063	Acadl
ENSMUSG00000014959	4381.13947124024	0.388693620062167	Gorasp2
ENSMUSG00000001604	52.2327794732874	-1.83932030090313	Tcea3
ENSMUSG00000076498	819.562467765898	0.900835494911823	NA
ENSMUSG00000035919	428.138104066007	-0.851998768134103	Bbs9
ENSMUSG00000041084	1612.16266953763	0.611982631259305	Ostc
ENSMUSG00000001995	1969.56512194952	-0.892586685178388	Sipa1l2
ENSMUSG00000040591	437.762412195749	-0.687408525207893	1110051M20Rik
ENSMUSG00000016526	268.640490393912	1.14791783145608	Dyrk3
ENSMUSG00000024901	264.902465594908	-1.05290074849867	Peli3
ENSMUSG00000046908	1797.25301111448	1.16879411631499	Ltb4r1
ENSMUSG00000001056	5185.59782767835	0.68904081559867	Nhp2
ENSMUSG00000041660	2494.10852059322	-1.33056279960472	Bbox1
ENSMUSG00000039236	245.500825773371	2.15461885056201	Isg20
ENSMUSG00000028639	14779.3284983243	0.467455446945922	Ybx1
ENSMUSG00000063455	573.165904801611	-0.861076084789288	D630045J12Rik
ENSMUSG00000021109	9412.42747638968	0.87982972411113	Hif1a
ENSMUSG00000107355	14.390869903715	4.65513946881994	NA
ENSMUSG00000028826	2479.01191293476	-0.507817859362487	Maco1
ENSMUSG00000037681	1002.88975970226	-0.881095520570251	Esyt3
ENSMUSG00000074653	101.050982922801	-1.73958549850511	Lrrc31
ENSMUSG00000006057	3763.67825335531	0.417331727844687	Atp5g1
ENSMUSG00000041754	20.6289205756605	7.4066068899141	Trem3
ENSMUSG00000078783	10.6421311197027	7.91768896422699	Gm9733
ENSMUSG00000005268	1627.24798146964	-0.961697215685196	Prlr
ENSMUSG00000024401	669.824887314397	1.63661525041	Tnf
ENSMUSG00000019297	1300.92558745433	0.539519276504246	Nop9
ENSMUSG00000021340	1068.69549041237	-0.915991955969001	Gpld1
ENSMUSG00000029623	4992.83581897296	0.361486976427664	Pdap1
ENSMUSG00000029500	1438.59035710911	0.613892839767756	Pgam5
ENSMUSG00000024588	2010.68286424962	-0.654332187931886	Fech
ENSMUSG00000027546	2938.08576234457	-0.55226869108607	Atp9a
ENSMUSG00000029718	203.692669415271	1.97267789459469	Pcolce
ENSMUSG00000032254	1639.51940980699	-0.882091964114655	Kif23
ENSMUSG00000021193	2937.50147702031	0.571089156850741	Pitrm1
ENSMUSG00000020918	3904.14015954733	0.453322914518289	Kat2a
ENSMUSG00000085022	120.724033099024	-1.5292109896928	Gm5860
ENSMUSG00000027185	2401.0292845614	0.568862329562599	Nat10
ENSMUSG00000004187	341.717377835418	-0.942910971229658	Kifc2
ENSMUSG00000041645	3183.40428246203	0.450115313411053	Ddx24
ENSMUSG00000048706	182.937524844542	-1.12846476380379	Lurap1l
ENSMUSG00000031666	1699.30097423325	-0.532254177223273	Rbl2
ENSMUSG00000024772	3005.73363609305	0.883951472830546	Ehd1
ENSMUSG00000028059	778.074226648255	0.67183355703059	Arhgef2
ENSMUSG00000037936	174.870223062574	0.983358387080228	Scarb1
ENSMUSG00000000142	2225.59670360019	-0.653725706038858	Axin2
ENSMUSG00000019864	364.656994058332	0.685249242061506	Rtn4ip1
ENSMUSG00000030035	542.101036249299	-0.618088471523773	Wbp1
ENSMUSG00000042747	818.932130540227	0.628611315089507	Krtcap2
ENSMUSG00000022383	117.112387682443	-1.21133117246557	Ppara
ENSMUSG00000026888	59.9393642804318	-1.38601457332579	Grb14
ENSMUSG00000040809	154.661970718568	6.7512851349517	Chil3
ENSMUSG00000028463	272.478400708266	1.9800445577437	Car9
ENSMUSG00000027075	1235.44188315355	1.00388517777739	Slc43a1
ENSMUSG00000059208	12681.7142691983	0.388163485601643	Hnrnpm
ENSMUSG00000028532	2670.13747381269	-0.81874269161286	Cachd1
ENSMUSG00000071711	1466.96364024436	-0.474085872287884	Mpst
ENSMUSG00000034994	167508.78574234	-0.362196923708238	Eef2
ENSMUSG00000049288	84.8261526324231	1.57520438381056	Lix1l
ENSMUSG00000030245	1445.03130829686	0.511757161546261	Golt1b
ENSMUSG00000003873	617.15402600319	0.589863217198691	Bax
ENSMUSG00000041477	567.39589395686	-0.484345785209232	Dcp1b
ENSMUSG00000041801	3421.2294580135	0.717593708607697	Phlda3
ENSMUSG00000073490	172.504545173091	2.45101579828517	Ifi207
ENSMUSG00000007739	10454.2080822696	0.352045153277366	Cct4
ENSMUSG00000027907	20438.8972971892	0.466082701907341	S100a11
ENSMUSG00000107881	252.049252867905	-0.920537554056404	NA
ENSMUSG00000030872	2282.96248835171	-0.789800670155472	Gga2
ENSMUSG00000031379	479.893286181117	-0.764152019126084	Pir
ENSMUSG00000021294	477.716820237454	-1.57817294492341	Kif26a
ENSMUSG00000024187	3225.98573814431	-0.715637490792902	Fam234a
ENSMUSG00000006589	2276.75476197112	0.641375936690159	Aprt
ENSMUSG00000079139	416.935150284478	0.741974899137649	NA
ENSMUSG00000026377	2029.77478768817	0.47944712284782	Nifk
ENSMUSG00000040276	94.8655291731494	-2.73539858886685	Pacsin1
ENSMUSG00000107994	181.424948212696	-1.05527308311118	NA
ENSMUSG00000097367	34.6312764718222	1.99583326447952	NA
ENSMUSG00000057143	149.300359328777	1.71753049529736	Trim12c
ENSMUSG00000030499	6666.94960375772	-0.618865887720104	Kctd15
ENSMUSG00000013275	2190.09741967957	0.759970305310405	Slc41a1
ENSMUSG00000027848	52.4051871714001	2.08738658436415	Olfml3
ENSMUSG00000067001	2527.40171589885	-0.994256576654317	Serpinb7
ENSMUSG00000030682	2720.40760936824	0.36475222424869	Cdipt
ENSMUSG00000036169	1317.85174036291	-1.12820929175086	Sostdc1
ENSMUSG00000040824	2606.60800369318	0.657520687025096	Snrpd2
ENSMUSG00000021259	51.0886515094768	-1.64173872193052	Cyp46a1
ENSMUSG00000030088	672.06913771943	0.892252823313972	Aldh1l1
ENSMUSG00000010797	18.6511880478595	3.06579418821248	Wnt2
ENSMUSG00000031578	2218.03277525267	0.430707517443137	Mak16
ENSMUSG00000021754	4412.91022871613	-0.616893779843967	Map3k1
ENSMUSG00000030595	2133.41376640141	0.452137674709579	Nfkbib
ENSMUSG00000104801	37.0988078607789	3.55056640007997	NA
ENSMUSG00000051652	73.4602135629817	-1.31356600268801	Lrrc3
ENSMUSG00000042178	1516.4253165079	-0.444774653825092	Armc5
ENSMUSG00000026017	400.493679779039	-0.600356102281942	Carf
ENSMUSG00000026986	157.456748898024	-0.964744121310356	Hnmt
ENSMUSG00000038932	30.3590314228981	3.02841957431309	Tcfl5
ENSMUSG00000052981	92.8895338282782	2.74604742602912	Ube2ql1
ENSMUSG00000007029	5519.16950917804	0.373235116723	Vars
ENSMUSG00000017781	8180.50986843915	0.368879041515993	Pitpna
ENSMUSG00000081512	54.3500023064296	2.17749485896277	NA
ENSMUSG00000039067	5592.56861525269	0.442017484212952	Psmd7
ENSMUSG00000024053	539.806229792222	3.96348614402419	Emilin2
ENSMUSG00000026005	1830.7017859193	0.465656716520517	Rpe
ENSMUSG00000049214	208.295011546194	-1.92503765556169	Skint7
ENSMUSG00000032643	345.376794378161	1.33251543647932	Fhl3
ENSMUSG00000110386	59.6151535764461	1.29588421087613	NA
ENSMUSG00000001510	822.184502625862	-1.0631289655583	Dlx3
ENSMUSG00000020912	38.9318115515499	-2.04944188321338	Krt12
ENSMUSG00000093577	54.5954246976764	-1.47982608866312	NA
ENSMUSG00000050382	192.758605995059	-0.926997993986543	Kif7
ENSMUSG00000052135	153.488060047276	-1.26914204604889	Foxo6
ENSMUSG00000028037	23.1463887042214	4.50252369142475	Ifi44
ENSMUSG00000032369	144.430580389371	1.2146870042725	Plscr1
ENSMUSG00000022136	2845.13783977118	0.482201166102824	Dnajc3
ENSMUSG00000049439	209.286063099536	0.869235633700218	Cyp20a1
ENSMUSG00000031780	15.0205952467324	3.61636885541979	Ccl17
ENSMUSG00000058794	17.5242098232899	4.09723748416968	Nfe2
ENSMUSG00000035799	42.7777350388257	2.1810412537995	Twist1
ENSMUSG00000028540	689.253273038313	0.956114300987725	Dph2
ENSMUSG00000029298	76.1907041581627	2.58813646346219	Gbp9
ENSMUSG00000028329	409.400802961597	-0.596772929824558	Xpa
ENSMUSG00000022253	481.395344177004	-0.755806418515748	Nadk2
ENSMUSG00000074656	6321.83220657764	0.391692679241726	Eif2s2
ENSMUSG00000051256	1157.08714338835	0.662043102109024	Jagn1
ENSMUSG00000049124	631.07890166818	0.734970536901556	NA
ENSMUSG00000020474	1357.05590008746	-0.611488370507749	Polm
ENSMUSG00000022584	110.021727851795	6.37210553363408	Ly6c2
ENSMUSG00000027506	4820.03673446856	0.513205067953808	Tpd52
ENSMUSG00000037007	236.495838095758	-0.806489644123529	Zfp113
ENSMUSG00000020262	1334.16748826137	-0.821486133888375	Adarb1
ENSMUSG00000058756	2695.17880514651	-0.592635819296951	Thra
ENSMUSG00000000308	12562.9945230103	-0.469588980654061	Ckmt1
ENSMUSG00000059895	984.961119366366	0.763698533155912	Ptp4a3
ENSMUSG00000030403	7245.82600971874	0.371005465072966	Vasp
ENSMUSG00000038301	78.877930838097	1.8679907645996	Snx10
ENSMUSG00000045968	35.317498986622	-1.76310472494096	Teddm2
ENSMUSG00000005732	4062.82678767597	0.660777679613964	Ranbp1
ENSMUSG00000035275	73.2075740467508	-1.20910523437704	Raver2
ENSMUSG00000034652	40.9015886940051	3.81854868435196	Cd300a
ENSMUSG00000043939	52.9801436220464	6.94914004124928	A530064D06Rik
ENSMUSG00000061479	3410.00402909209	0.680859072409897	Snrpa
ENSMUSG00000057649	1775.52875611083	-0.448881461396405	Brd9
ENSMUSG00000091337	2313.57389692427	-0.525207883179218	Eid1
ENSMUSG00000060671	3225.23503803555	-0.663223225535934	Atp8b2
ENSMUSG00000020720	3090.04232417801	0.324756394844858	Psmd12
ENSMUSG00000021662	763.845299884124	-0.813537295285102	Arhgef28
ENSMUSG00000103749	68.373027118264	1.41538021463376	Pcdhgb5
ENSMUSG00000052085	1617.84333355094	-0.767510581169489	Dock8
ENSMUSG00000078144	4013.34195597796	-0.81112942199172	Capns2
ENSMUSG00000045312	73.1098514953155	2.06793005624539	Lhfpl2
ENSMUSG00000045790	144.025785054437	-1.00376426874633	Ccdc149
ENSMUSG00000043740	18.5117758510109	6.66652449889808	B430306N03Rik
ENSMUSG00000019088	635.352197293116	-0.548301907241527	Dnase1l1
ENSMUSG00000030731	128.547538534849	-1.12435803468146	Syt3
ENSMUSG00000067722	1001.70544346666	0.521976850906321	BC003965
ENSMUSG00000071072	3441.91176078395	0.58033203894017	Ptges3
ENSMUSG00000026872	198.965439986657	3.8621500215188	Zeb2
ENSMUSG00000066829	178.278072709815	-1.12358485891993	Zfp810
ENSMUSG00000106019	123.710813344791	-0.934850410385832	NA
ENSMUSG00000023903	44.2699076277248	2.18938504231984	Mmp25
ENSMUSG00000043263	47.2137714946521	5.13793110353859	Ifi209
ENSMUSG00000039701	1485.83208779543	-0.694275666624628	Usp53
ENSMUSG00000006736	1997.50467729885	0.390481053050315	Tspan31
ENSMUSG00000000085	1143.61565000246	-0.626057539181796	Scmh1
ENSMUSG00000022749	1191.30640386602	-0.426403961280346	Tbc1d23
ENSMUSG00000045932	106.93317403198	4.26118212242911	Ifit2
ENSMUSG00000027495	1606.36148352302	-0.702413347203827	Fam210b
ENSMUSG00000032691	1154.39758583222	3.1868104558298	Nlrp3
ENSMUSG00000068617	263.765451323447	-1.23062886378186	Efcab1
ENSMUSG00000046259	466.263496733332	2.37538490797206	Sprr2h
ENSMUSG00000029480	1574.49663330515	0.60227269654979	Dhx37
ENSMUSG00000021276	1059.85996678752	0.495565921362476	Cinp
ENSMUSG00000041777	677.488646409663	-0.586183036861596	Cir1
ENSMUSG00000053317	1333.83395649181	0.543757015673843	Sec61b
ENSMUSG00000055067	490.731239013871	-0.538567147146153	Smyd3
ENSMUSG00000036446	94.8680920324933	1.94057593648366	Lum
ENSMUSG00000028557	3307.08043779138	0.444536590719342	Rnf11
ENSMUSG00000020032	1279.11881221397	-0.924166265201909	Nuak1
ENSMUSG00000030718	1867.86132561453	0.501781632145505	Ppme1
ENSMUSG00000031068	4736.37915336047	0.363024576616897	Glrx3
ENSMUSG00000021361	2768.3084229538	0.536225474177499	Tmem14c
ENSMUSG00000030471	1123.16486450407	0.687738983407879	Zdhhc13
ENSMUSG00000050234	47.2950123616165	-1.29221097293407	Gja4
ENSMUSG00000027074	85.3461244527155	2.12111827634238	Slc43a3
ENSMUSG00000032839	196.789493337702	-1.06113206628277	Trpc1
ENSMUSG00000030353	369.288901073708	1.14021681673605	Tead4
ENSMUSG00000068922	1114.26034774351	0.550321309618164	Msto1
ENSMUSG00000034320	3563.21304039053	-0.750069187424129	Slc26a2
ENSMUSG00000004567	2159.68805327632	-0.407720993638091	Mcoln1
ENSMUSG00000066684	18.0370051493764	3.73331447211217	Pilrb1
ENSMUSG00000026554	4071.33003904807	-0.429453640602105	Dcaf8
ENSMUSG00000039270	3610.34490365	-0.593069535135855	Megf9
ENSMUSG00000001227	33.926216683862	2.57909212198963	Sema6b
ENSMUSG00000029810	1233.50688094714	0.84311111602776	Tmem176b
ENSMUSG00000024037	1432.49328779836	0.438786845514778	Wdr4
ENSMUSG00000028148	11241.9404701719	-0.977723920936942	Them5
ENSMUSG00000026686	16.5177427810342	2.49640097524724	Lmx1a
ENSMUSG00000033985	185.275321125251	-1.1185526769518	Tesk2
ENSMUSG00000024661	25571.2345588308	0.943562839694337	Fth1
ENSMUSG00000009647	639.084501077629	-0.517108149490496	Mcu
ENSMUSG00000038578	221.556114430783	0.995592805447372	Susd1
ENSMUSG00000025962	698.362538661845	0.53651680472197	Fastkd2
ENSMUSG00000026566	722.935023546727	-0.544221262518128	Mpzl1
ENSMUSG00000024589	1679.51193193531	0.848012192615626	Nedd4l
ENSMUSG00000049985	56.6785036928568	1.63372321304106	Ankrd55
ENSMUSG00000066097	8.55976195425893	6.61574056656781	Cyp2j11
ENSMUSG00000031129	517.701321214351	-0.988534677550564	Slc9a9
ENSMUSG00000050730	810.495849808558	-0.674631094768261	Arhgap42
ENSMUSG00000044811	18.9081573391757	2.75581025966305	Cd300c2
ENSMUSG00000018907	8592.29887091909	-1.36911445901975	Alox12e
ENSMUSG00000036452	124.546626602526	1.51763277769252	Arhgap26
ENSMUSG00000026463	13357.4665096556	-1.05999504686903	Atp2b4
ENSMUSG00000087689	56.7164844292929	1.71632241136411	NA
ENSMUSG00000029610	1399.25887670381	0.585474059473293	Aimp2
ENSMUSG00000050069	16.2162732117986	5.01149120335533	Grem2
ENSMUSG00000053411	739.611572067517	-0.827388250090102	Cbx7
ENSMUSG00000025185	59.7224761358325	2.0301961797671	Loxl4
ENSMUSG00000032968	203.017401718346	-0.945475728230866	Inha
ENSMUSG00000030224	7035.86779994655	0.416433153703103	Strap
ENSMUSG00000101856	165.346195785417	-0.898668406627728	1700096K18Rik
ENSMUSG00000097888	9.13017891572114	4.29212367343054	Gm26682
ENSMUSG00000074781	2567.87350854635	0.412961970528362	Ube2n
ENSMUSG00000022844	107.242904083827	1.10249241910329	Pdia5
ENSMUSG00000044433	4889.7454567106	-0.796089997272846	Camsap3
ENSMUSG00000001729	9277.52386980113	0.295451915307101	Akt1
ENSMUSG00000068749	2894.99357515506	0.506958908312461	Psma5
ENSMUSG00000060002	289.219576316949	-0.936391676491237	Chpt1
ENSMUSG00000008855	6256.20837867821	-0.786032009983065	Hdac5
ENSMUSG00000031137	318.366243650802	-1.02154613786321	Fgf13
ENSMUSG00000034641	58.259786526696	5.79832163998894	Cd300ld
ENSMUSG00000023349	45.3925677379947	3.55699919234996	Clec4n
ENSMUSG00000057789	1041.95117086393	0.512430869403093	Bak1
ENSMUSG00000002812	6346.68801386307	0.501646282455566	Flii
ENSMUSG00000112266	15.9813538438189	-3.03491959495476	NA
ENSMUSG00000054843	2491.54803729628	-0.70741798489082	Atrnl1
ENSMUSG00000025330	21.0623830811211	3.28376889344897	Padi4
ENSMUSG00000043832	21.6272863719542	3.4232779522493	Clec4a3
ENSMUSG00000071604	720.866742553845	-1.04415195979634	Fam189a2
ENSMUSG00000020248	1887.00719377164	0.614818012421126	Nfyb
ENSMUSG00000024236	3603.86569863839	-0.697402648490721	Svil
ENSMUSG00000029279	129.274247805116	-1.04178506160065	Brdt
ENSMUSG00000041375	3775.8749015402	-0.43951794775062	Ccdc9
ENSMUSG00000004637	369.869742364944	-0.710802794752313	Wwox
ENSMUSG00000031274	2149.32431324485	-1.33132494548934	Col4a5
ENSMUSG00000054474	151.376382047961	-0.878270436751168	Thnsl2
ENSMUSG00000031960	3299.24226830733	0.508206557161475	Aars
ENSMUSG00000045827	136.759103681318	1.47251348911835	Serpinb9
ENSMUSG00000032123	1273.52309514063	0.448648566986917	Dpagt1
ENSMUSG00000048038	54.2250252364409	-1.66544212895969	Ccdc187
ENSMUSG00000022724	1589.20766085283	0.624497816609628	Riox2
ENSMUSG00000061259	68.5549356932221	2.3907586226699	Tmprss11d
ENSMUSG00000020538	10022.3096462875	-0.572584674973182	Srebf1
ENSMUSG00000028756	3400.57643387172	-0.787922347879836	Pink1
ENSMUSG00000095253	216.55494173436	-0.934292381805111	Zfp799
ENSMUSG00000046434	15613.3828464344	0.363824545179007	Hnrnpa1
ENSMUSG00000087177	94.2248611071115	-0.978362589133282	E130307A14Rik
ENSMUSG00000045394	5290.48209988601	0.804219647096065	Epcam
ENSMUSG00000040703	417.520985823317	-0.801316388697821	Cyp2s1
ENSMUSG00000064080	266.3375609984	1.79877081756014	Fbln2
ENSMUSG00000074183	103.942936440529	1.45540171420094	Gsta1
ENSMUSG00000060131	78.3004701714554	2.16358189475897	Atp8b4
ENSMUSG00000031633	3642.83755338918	0.510712541951007	Slc25a4
ENSMUSG00000056938	1622.03700988344	-0.691335926412461	Acbd4
ENSMUSG00000028879	4192.741208788	0.448031270506546	Stx12
ENSMUSG00000007458	5213.28381209939	0.421392573042766	M6pr
ENSMUSG00000046807	67.907617525882	-1.8489333827994	Lrrc75b
ENSMUSG00000033628	1296.59197863749	-0.471166567208467	Pik3c3
ENSMUSG00000001156	2054.71996839404	2.03178038766513	Mxd1
ENSMUSG00000038845	2204.62801227032	0.666990830262924	Phb
ENSMUSG00000001175	12787.2577917711	0.340396982771919	Calm1
ENSMUSG00000038383	1411.863835423	0.412317827550255	Pigu
ENSMUSG00000071644	26628.4214137833	0.550187486704941	Eef1g
ENSMUSG00000038305	366.49326173409	-0.806517465049536	Spats2l
ENSMUSG00000070315	72.4583822140857	1.38319178644041	4930581F22Rik
ENSMUSG00000035437	3308.19201828265	-0.614970598356835	Rabgap1
ENSMUSG00000039232	871.006132376973	1.67361167820426	Stx11
ENSMUSG00000031812	11068.4596272539	0.518458691028512	Map1lc3b
ENSMUSG00000050860	138.32397543782	-1.09956312647006	Phospho1
ENSMUSG00000038762	6517.33875193976	0.356684757638986	Abcf1
ENSMUSG00000030007	10002.8623507945	0.424547980706133	Cct7
ENSMUSG00000030598	106.258569180469	0.923286774894522	Fbxo17
ENSMUSG00000112819	21.9939419284887	2.3186858212529	NA
ENSMUSG00000026615	7523.82850370586	0.626392212068439	Eprs
ENSMUSG00000050578	914.145112267352	3.9946465190168	Mmp13
ENSMUSG00000028343	2960.6957333172	0.508597982328974	Erp44
ENSMUSG00000027671	2260.75536974291	0.287289133066327	Actl6a
ENSMUSG00000027709	1898.2919298715	-0.500690813539054	Mccc1
ENSMUSG00000001785	1753.28445241479	0.494062210473671	Pwp1
ENSMUSG00000027642	8232.58334584949	0.403218120203549	Rpn2
ENSMUSG00000019822	1167.62044140834	-0.545789220573181	Smpd2
ENSMUSG00000042524	8286.61546927049	-0.66357980924124	Sun2
ENSMUSG00000020549	2398.29121803493	0.546136152728296	Elac2
ENSMUSG00000036398	1407.20672358976	0.512447700012031	Ppp1r11
ENSMUSG00000028435	69873.8571771204	0.611545610629986	Aqp3
ENSMUSG00000071176	1329.3461375682	-0.637322379670825	Arhgef10
ENSMUSG00000000776	1411.08980422114	0.449574237896978	Polr3d
ENSMUSG00000097048	747.707506947628	-0.902751955947432	1600020E01Rik
ENSMUSG00000051682	15.6351906159868	7.00804129451278	Treml4
ENSMUSG00000046727	86.2117738576822	1.69538752880652	Cystm1
ENSMUSG00000034910	215.601863113782	-1.01645225648476	Pygo1
ENSMUSG00000028551	1291.72570662217	-0.612868763417167	Cdkn2c
ENSMUSG00000032440	2675.38988142736	0.714898460390923	Tgfbr2
ENSMUSG00000041057	3999.54550734256	0.520189506081386	Wdr43
ENSMUSG00000048480	7.21574087326124	6.55267508521966	Cxcr1
ENSMUSG00000028837	3610.2154082684	0.372734787222335	Psmb2
ENSMUSG00000038718	293.629362384735	-0.742965897696331	Pbx3
ENSMUSG00000021895	2131.70987797258	-0.618612355325882	Arhgef3
ENSMUSG00000026791	553.368062181265	-0.635862276422753	Slc2a8
ENSMUSG00000042642	1277.81343107053	0.537652240837807	Flad1
ENSMUSG00000044244	7589.21546484577	-1.02381424450782	Il20rb
ENSMUSG00000066361	60.5606465023967	1.98282351029675	Serpina3c
ENSMUSG00000002825	692.435914262512	0.831633972763696	Qtrt1
ENSMUSG00000031383	116.533699543277	1.25245244483761	Dusp9
ENSMUSG00000058761	1112.07521937944	-0.496241823821647	Rnf169
ENSMUSG00000070709	86.2215994962586	-1.03393173090274	Zfp974
ENSMUSG00000048163	345.517971292347	2.01908627607079	Selplg
ENSMUSG00000041471	316.500892378677	-0.695845086905024	Shld2
ENSMUSG00000038489	956.151988036584	0.611134633956605	Polr2l
ENSMUSG00000020263	1961.8636581696	-1.06579881218976	Appl2
ENSMUSG00000052062	522.40680303226	-0.936853729345028	Pard3b
ENSMUSG00000032959	5531.94934789444	0.569321312089578	Pebp1
ENSMUSG00000026893	16.3716306874749	2.94931497546188	Gca
ENSMUSG00000032334	84.9980531397804	1.88809329993693	Loxl1
ENSMUSG00000026027	561.325462870821	-0.504604406042719	Stradb
ENSMUSG00000024436	999.652147574951	0.497735926117328	Mrps18b
ENSMUSG00000022519	135.846961291617	1.49403281787017	Srl
ENSMUSG00000079560	193.001641227752	-0.899816994786281	Hoxa3
ENSMUSG00000034175	440.103840471762	-0.579479190666759	Rhbdd3
ENSMUSG00000025150	1068.00748871802	-0.759794946295927	Cbr2
ENSMUSG00000044103	841.482150366557	1.13554142057507	Il1f9
ENSMUSG00000096054	730.290037460653	-1.34957987665802	Syne1
ENSMUSG00000041058	2344.40626364141	-0.55684582777958	Wwp1
ENSMUSG00000024397	15.7620982726532	3.31114199848176	Aif1
ENSMUSG00000091586	414.532625854594	-0.598188535225024	Cyp4f17
ENSMUSG00000020472	1052.74831528668	-0.532291996163763	Zkscan17
ENSMUSG00000058351	211.327289279345	-0.796246344902651	Smim4
ENSMUSG00000045551	69.1095738119044	7.54204188948578	Fpr1
ENSMUSG00000024769	12568.2331659222	-0.56740180433447	Cdc42bpg
ENSMUSG00000031596	357.291262391591	-0.938624496051531	Slc7a2
ENSMUSG00000063787	793.303366425327	0.516111293134886	Chchd1
ENSMUSG00000031304	132.55133211341	1.61279650702827	Il2rg
ENSMUSG00000024640	6233.64648706848	-0.576510732480109	Psat1
ENSMUSG00000025995	2331.01398369392	0.390184324349099	Wdr75
ENSMUSG00000070427	109.360311874594	1.44276776525805	Il18bp
ENSMUSG00000026581	314.377295304022	6.28139233992693	Sell
ENSMUSG00000075592	243.806360803507	-1.03460618601486	Nynrin
ENSMUSG00000039768	3238.8087033461	0.356559774769366	Dnajc11
ENSMUSG00000020311	783.81653398225	-0.595728517773994	Erlec1
ENSMUSG00000052707	3105.65324488733	-0.571564922811105	Tnrc6a
ENSMUSG00000024875	2041.70927116768	0.465747955492268	Yif1a
ENSMUSG00000024597	5109.35115775545	-0.610385237027912	Slc12a2
ENSMUSG00000028803	650.155070405606	-0.68513651937621	Nipal3
ENSMUSG00000060301	640.458477752292	-0.767372141789722	2610008E11Rik
ENSMUSG00000025666	26.0286839086537	1.6832110079136	Tmem47
ENSMUSG00000015671	4810.49297823798	0.325850546752714	Psma2
ENSMUSG00000032373	11680.8052105168	0.617494393590062	Car12
ENSMUSG00000032026	2746.90507852252	0.633654021110354	Rexo2
ENSMUSG00000073775	1210.64807789209	0.623036173930202	Kti12
ENSMUSG00000030879	2032.90626713288	0.515849089973939	Mrpl17
ENSMUSG00000005800	44.4456839776797	6.70155395586345	Mmp8
ENSMUSG00000059013	191.998179319723	3.01785596802647	Sh2d3c
ENSMUSG00000025050	693.049920425851	0.498538028840995	Pcgf6
ENSMUSG00000087434	30.2934528593841	-2.00164825664141	Rab11fip4os1
ENSMUSG00000025969	860.424759577261	1.06811981261371	Nrp2
ENSMUSG00000026784	220.749989414351	0.893581681650587	Pdss1
ENSMUSG00000026469	1898.52258381619	0.621367893836334	Xpr1
ENSMUSG00000022534	180.007654432507	6.09201133886081	Mefv
ENSMUSG00000039497	287.023750984174	0.775465797616548	Dse
ENSMUSG00000085020	35.752376179326	-2.6131618863713	NA
ENSMUSG00000004347	76.0780145539801	-1.60414599849632	Pde1c
ENSMUSG00000048756	1710.89401067237	-0.42768223614427	Foxo3
ENSMUSG00000043421	301.226232035741	0.947190389833625	Hilpda
ENSMUSG00000030530	6415.2876350176	0.587733745678795	Furin
ENSMUSG00000027531	709.090759852097	0.598074194400851	Impa1
ENSMUSG00000027944	1291.48519768085	0.463813635288637	Hax1
ENSMUSG00000033272	3632.27651752079	0.339817946032975	Slc35a4
ENSMUSG00000029167	19.669627227055	-2.43214087606872	Ppargc1a
ENSMUSG00000051391	5385.0533819357	0.499614880746869	Ywhag
ENSMUSG00000053333	1383.20983663422	-0.362246689106601	Dis3l2
ENSMUSG00000027429	2202.21902739866	0.490931546190881	Sec23b
ENSMUSG00000020808	331.759073348118	-1.26667126858012	Pimreg
ENSMUSG00000030435	10773.2083744028	0.363196034842736	U2af2
ENSMUSG00000063524	20958.5355338026	0.658624171570487	Eno1
ENSMUSG00000079442	38.8890655063958	2.13278001959196	St6galnac4
ENSMUSG00000022225	38.0760792884311	3.18767850258051	Cma1
ENSMUSG00000004789	4770.35882769739	0.380058097568171	Dlst
ENSMUSG00000022575	144.191991758869	1.33725038659137	Gsdmd
ENSMUSG00000048731	266.877043834405	-0.561280740503204	Ggnbp1
ENSMUSG00000031984	1357.63017559783	0.488600737886853	2810004N23Rik
ENSMUSG00000026790	2979.46808677274	-0.419005787346687	Odf2
ENSMUSG00000071103	104.701713292705	-0.863675888326087	1700029J07Rik
ENSMUSG00000060166	1241.04702269633	-0.50147358421355	Zdhhc8
ENSMUSG00000006998	12298.6406534513	0.39139638335747	Psmd2
ENSMUSG00000033991	3372.47503005064	0.804127948846674	Ttc37
ENSMUSG00000030987	5810.8935691375	-0.618259368330147	Stim1
ENSMUSG00000028069	1252.04773655889	0.597651047749825	Gpatch4
ENSMUSG00000025764	1113.45651987751	-0.599629366310171	Jade1
ENSMUSG00000074364	6383.58385732205	-0.527908467828198	Ehd2
ENSMUSG00000071647	2688.15370835096	-0.446991113216312	Eml3
ENSMUSG00000022817	4720.12841405251	-0.767865237920623	Itgb5
ENSMUSG00000025145	3570.34875748622	-0.340187942850141	Lrrc45
ENSMUSG00000021764	1283.28726019928	0.399157028137927	Ndufs4
ENSMUSG00000034394	97.9542688117283	1.47817624511309	Lif
ENSMUSG00000063884	2102.43257258935	0.398581756111245	Ptcd3
ENSMUSG00000027133	1514.03454622866	0.48963817838404	Nop10
ENSMUSG00000013878	586.874062469032	-0.661005995216058	Rnf170
ENSMUSG00000049107	170.434304032581	-1.09936572711371	Ntf3
ENSMUSG00000020889	11800.048714117	-0.811685050008734	Nr1d1
ENSMUSG00000039849	2230.30291615542	-0.344459862302136	Pcif1
ENSMUSG00000039092	2486.98055393143	-1.21016475427292	Sptlc3
ENSMUSG00000048373	7957.54468276569	0.698114535536212	Fgfbp1
ENSMUSG00000039611	1131.24312872569	-1.11436479519667	Tmem246
ENSMUSG00000041765	2287.30426655328	0.562589868521959	Ubac2
ENSMUSG00000029648	91.9073848460855	1.90095883799918	Flt1
ENSMUSG00000024737	622.441584153189	2.82881079118712	Slc15a3
ENSMUSG00000049401	1832.3778175405	0.631415484893621	Ogfr
ENSMUSG00000044927	486.240341008132	-1.20595190553517	H1f10
ENSMUSG00000039814	60.2870646266234	-1.41266191514118	Xkr5
ENSMUSG00000035847	3236.34380883133	-0.527426042673906	Ids
ENSMUSG00000038020	15833.516831219	-0.766881057372223	Rapgefl1
ENSMUSG00000031875	102.819697011195	1.22232271005885	Cmtm3
ENSMUSG00000032458	5340.84255861531	0.30956830650339	Copb2
ENSMUSG00000008475	8284.80206094242	0.26351654617807	Arpc5
ENSMUSG00000070822	383.587414030102	-1.08933165189399	Zscan18
ENSMUSG00000072762	172.900495096941	-0.683492662972046	4930522L14Rik
ENSMUSG00000021319	102.520052784419	2.00821779921618	Sfrp4
ENSMUSG00000058715	285.496594239552	2.94303465860821	Fcer1g
ENSMUSG00000031996	9538.39839519414	-0.295561614286212	Aplp2
ENSMUSG00000020612	6412.89111698764	0.368094740448752	Prkar1a
ENSMUSG00000030079	1246.09190058362	0.590678578667521	Ruvbl1
ENSMUSG00000017843	4580.84250351736	-0.407609131074889	Ppp2r5c
ENSMUSG00000005949	728.339209167673	-0.521458168491606	Ctns
ENSMUSG00000037706	3501.90262944414	0.538657663864333	Cd81
ENSMUSG00000026482	105.008171770046	1.69383378843838	Rgl1
ENSMUSG00000022667	10.845749063857	3.48054530313684	Cd200r1
ENSMUSG00000042157	64.0012281304826	4.35011992962344	Sprr2i
ENSMUSG00000021572	175.041061097704	-0.808768874823175	Cep72
ENSMUSG00000020062	157.037774764482	1.59424785720309	Slc5a8
ENSMUSG00000031112	1047.10382655689	-0.572405936211932	Stk26
ENSMUSG00000020064	3246.19476439588	0.435385439202892	Herc4
ENSMUSG00000029162	443.776288949633	-0.772480830889581	Khk
ENSMUSG00000032553	1339.03829130995	0.578384882476153	Srprb
ENSMUSG00000022842	368.082670332226	0.613452591935118	Ece2
ENSMUSG00000040078	326.895033301826	0.623402955828792	NA
ENSMUSG00000073102	39.1480105967606	-1.58992045890461	Drc1
ENSMUSG00000021733	682.16037282902	0.801895303757512	Slc4a7
ENSMUSG00000021594	1771.33168607077	-0.629913581685085	Srd5a1
ENSMUSG00000024677	30.7980551488821	3.795836733164	Ms4a6b
ENSMUSG00000021886	30.7766393032574	2.51005480550357	Gpr65
ENSMUSG00000018433	1455.17160028954	0.45954987554378	Nol11
ENSMUSG00000018583	9885.38047379099	0.436382840614694	G3bp1
ENSMUSG00000007721	2207.83802476713	0.573341369944891	Ccdc124
ENSMUSG00000037541	23.5335127874558	-2.67489213940601	Shank2
ENSMUSG00000020834	377.455517374932	1.76473586229295	Dhrs13
ENSMUSG00000053158	308.990944028402	1.17318907946023	Fes
ENSMUSG00000052125	175.829378018703	1.23242932902827	F730043M19Rik
ENSMUSG00000062761	560.477165711617	-0.531459256735931	Zfp512
ENSMUSG00000034429	313.578992296973	-0.719539040949119	Zfp707
ENSMUSG00000027374	1526.84519088471	0.433236462277328	Mrps5
ENSMUSG00000004264	9016.78919780333	0.341149651927262	Phb2
ENSMUSG00000022353	3374.80624408241	0.67937894095411	Mtss1
ENSMUSG00000062580	1649.42641554359	0.418947473380207	Timm17a
ENSMUSG00000030082	8066.22127579457	0.432785868228867	Sec61a1
ENSMUSG00000024493	3571.62093274996	0.421224020885552	Lars
ENSMUSG00000023064	207.971919973689	-1.43742877598742	Sncg
ENSMUSG00000028434	4965.38373844528	-0.371673862867003	Epb41l4b
ENSMUSG00000033161	47345.9924721108	0.522662943924155	Atp1a1
ENSMUSG00000021610	5197.50386809053	0.363983367633816	Clptm1l
ENSMUSG00000021451	1492.90814206416	1.0289456992474	Sema4d
ENSMUSG00000069874	118.627462788536	1.70979352148463	Irgm2
ENSMUSG00000031221	3439.16731128181	-0.413730922257774	Igbp1
ENSMUSG00000026676	1990.9138757395	-1.01867382283219	Ccdc3
ENSMUSG00000047945	1431.21594145077	1.59391533503626	Marcksl1
ENSMUSG00000033389	508.600064969521	-0.8661882429837	Arhgap44
ENSMUSG00000030340	2772.4019319083	0.954377958540052	Scnn1a
ENSMUSG00000021484	5797.82137998368	0.373127531769384	Lman2
ENSMUSG00000060275	347.743383418186	-1.0573189277301	Nrg2
ENSMUSG00000099145	105.420408567095	-1.54665987594362	Mir8116
ENSMUSG00000104348	59.6891621028209	5.47805946289542	NA
ENSMUSG00000039016	883.673916148349	0.476285850502222	Timm8b
ENSMUSG00000020871	76.6372599240892	-1.29121431425393	Dlx4
ENSMUSG00000032536	6718.77217911834	-0.522982295381191	Trak1
ENSMUSG00000086552	79.4707832485738	-1.07822710978137	Dlx4os
ENSMUSG00000097039	87.7164891046439	1.10898125016534	Pvt1
ENSMUSG00000034801	2805.07152490498	-0.55452172554294	Sos2
ENSMUSG00000061898	1104.25503919666	-0.638643202855727	Rbak
ENSMUSG00000002660	1193.5908700568	0.604493604126486	Clpp
ENSMUSG00000062785	497.92376556461	1.06430186955817	Kcnc3
ENSMUSG00000026779	414.629096101275	-1.05844218819029	Mastl
ENSMUSG00000020180	2794.31672617226	0.554624006166973	Snrpd3
ENSMUSG00000001151	1981.15394757431	-0.533960282050948	Pcnt
ENSMUSG00000032589	287.928009820912	-1.02528182271047	Bsn
ENSMUSG00000078122	45.6336171589377	6.74021702131247	F630028O10Rik
ENSMUSG00000047879	2376.84383494729	0.352208552072288	Usp14
ENSMUSG00000032449	1257.58661658524	-0.522653949995723	Slc25a36
ENSMUSG00000003438	2159.71594426629	0.512870837727177	Timm50
ENSMUSG00000029838	2103.80787976348	-1.06817467619766	Ptn
ENSMUSG00000047884	285.3276086834	1.65371091408658	Klk9
ENSMUSG00000038593	586.952429036525	-0.488545125887895	Tctn1
ENSMUSG00000108255	51.6056659344964	-1.49527723731672	NA
ENSMUSG00000022833	275.040062227631	-0.635779072369686	Ccdc14
ENSMUSG00000029755	1068.14701269498	-0.628267670099052	Dlx5
ENSMUSG00000091618	3044.87671339473	-1.09092792866168	H60c
ENSMUSG00000003228	103.67681010475	1.31902088440845	Grk5
ENSMUSG00000038268	275.974557687094	0.623281585495569	Ovca2
ENSMUSG00000038415	1076.87042056522	-0.784578809207045	Foxq1
ENSMUSG00000040928	921.823592248366	-0.727143782342414	S100pbp
ENSMUSG00000031790	1748.20720348077	-0.686389631145492	Mmp15
ENSMUSG00000102037	10.394830397147	4.65596823078053	Bcl2a1a
ENSMUSG00000042477	1015.67311268957	-0.787544321472902	Tfap2e
ENSMUSG00000038290	2018.70962083476	-0.531973142521795	Smg6
ENSMUSG00000011179	7354.47843816449	0.910978032713025	Odc1
ENSMUSG00000027828	8040.82427354814	0.413996095343076	Ssr3
ENSMUSG00000056145	50.2326309335002	2.94794346296075	AI504432
ENSMUSG00000032092	6403.55988383316	0.594251433507537	Mpzl2
ENSMUSG00000030615	401.20929792583	0.55237277961134	Tmem126a
ENSMUSG00000045664	51.887934697341	1.8317692696567	Cdc42ep2
ENSMUSG00000032637	11807.4563813885	0.449469810265015	Atxn2l
ENSMUSG00000023452	783.979237918532	0.55849211323934	Pisd
ENSMUSG00000057092	12723.8648898879	-0.49358658163551	Fxyd3
ENSMUSG00000025917	3761.82735270817	0.287967252344103	Cops5
ENSMUSG00000046756	1937.60562070044	0.389773195002402	Mrps7
ENSMUSG00000044475	1047.5080491357	-0.492457475881485	Ascc1
ENSMUSG00000035278	1259.67316644734	0.613261285472119	Plekhj1
ENSMUSG00000028771	2660.28120225616	0.626734578900196	Ptpn12
ENSMUSG00000052962	929.256884567993	0.540102928643389	Mrpl35
ENSMUSG00000057421	2296.43758815909	0.424643143137411	Las1l
ENSMUSG00000108723	153.053178926053	-0.944457782148728	NA
ENSMUSG00000079186	58.3860198125819	2.53876118108895	Gzmc
ENSMUSG00000038034	5793.2227661817	0.724988156422527	Igsf8
ENSMUSG00000025165	862.847144497381	0.876921293789114	Sectm1a
ENSMUSG00000030427	30.3902372883919	6.11921687998866	Lilra6
ENSMUSG00000030093	66.0899177640496	-1.59791813920339	Wnt7a
ENSMUSG00000030830	194.294367677628	1.94216585995624	Itgal
ENSMUSG00000031351	5759.78778494643	-0.755849278918348	Zfp185
ENSMUSG00000045467	39.5594590914738	-1.48230346748568	Ttll13
ENSMUSG00000042284	25.7148452288638	2.0380597642653	Itga1
ENSMUSG00000028068	1115.03553282581	-0.840020130335544	Iqgap3
ENSMUSG00000000120	480.021302588447	-0.821314542958905	Ngfr
ENSMUSG00000042190	28.7390493773777	2.30056438768787	Cmklr1
ENSMUSG00000030986	2087.25491158785	-0.617856917929356	Dhx32
ENSMUSG00000018849	3069.35613728659	0.574267738491609	Wwc1
ENSMUSG00000041774	350.224705538907	0.730722408650921	Ydjc
ENSMUSG00000029462	1661.81116986877	0.348007583046523	Vps29
ENSMUSG00000041623	329.336461781285	0.868824544869991	D11Wsu47e
ENSMUSG00000032344	384.784857676051	0.950144236337136	Cgas
ENSMUSG00000025217	507.975880278097	-0.650178941417757	Btrc
ENSMUSG00000101517	12.1066662160971	3.65880149483074	NA
ENSMUSG00000029798	73.7409833117056	2.10508318247323	Herc6
ENSMUSG00000062939	11.3918220184824	3.57984641565497	Stat4
ENSMUSG00000027371	280.819547495876	-0.749936077790765	Fahd2a
ENSMUSG00000039474	334.65443983547	0.735443751439117	Wfs1
ENSMUSG00000006315	2658.14101467696	0.520872056886444	Tmem147
ENSMUSG00000085006	35.4137440330368	-1.67967996878955	NA
ENSMUSG00000078920	51.2926643065342	4.06959359361632	Ifi47
ENSMUSG00000037095	275.45884041758	4.52628466263408	Lrg1
[truncated: 1 more rows]

## Sheet: I3C diet
gene	baseMean	log2FoldChange	symbol
ENSMUSG00000056515	1937.96491986442	4.28289112337751	Rab31
ENSMUSG00000044734	3218.21402498019	3.72453979796645	Serpinb1a
ENSMUSG00000026822	1808.68016000493	5.90268129984736	Lcn2
ENSMUSG00000071561	7761.47078265486	3.20720575324281	Cstdc5
ENSMUSG00000021509	2141.20252338212	2.8036331203661	Slc25a48
ENSMUSG00000030681	5014.83419291363	1.63265166342484	Mvp
ENSMUSG00000021091	1303.94941931656	6.7010668979288	Serpina3n
ENSMUSG00000026880	10708.3395664556	2.66734684740089	Stom
ENSMUSG00000096001	4476.51747634655	5.5236285562867	2610528A11Rik
ENSMUSG00000049303	378.10416953399	2.58652751812727	Syt12
ENSMUSG00000071562	2673.47519429521	2.6486949143068	Stfa1
ENSMUSG00000027639	6877.5094079496	3.12078755466898	Samhd1
ENSMUSG00000034853	396.038672778206	3.01949137603539	Acot11
ENSMUSG00000020467	779.086979493098	-2.94176711232681	Efemp1
ENSMUSG00000025743	1139.43313563282	4.22288457016222	Sdc3
ENSMUSG00000024891	1436.48457712926	2.80163674344973	Slc29a2
ENSMUSG00000045934	2099.62162010906	-1.18236118496254	Mtmr11
ENSMUSG00000105987	5386.43166579314	1.91759710739038	AI506816
ENSMUSG00000026180	557.769371544627	5.1166595876544	Cxcr2
ENSMUSG00000066800	737.767567380197	3.85971452288581	Rnasel
ENSMUSG00000092572	1883.83502846001	-2.1660831759099	Serpinb10
ENSMUSG00000045349	740.359017926999	5.34231965172796	Sh2d5
ENSMUSG00000022094	1869.6435133441	2.97928691901716	Slc39a14
ENSMUSG00000029093	413.201878591509	2.49789429840746	Sorcs2
ENSMUSG00000110368	347.240798218369	4.95889134287689	NA
ENSMUSG00000026473	4631.36397210722	-2.47641142080346	Glul
ENSMUSG00000025481	13349.2284842711	1.81130643174865	Urah
ENSMUSG00000020009	2449.17227943025	1.58823347720511	Ifngr1
ENSMUSG00000053797	59177.229873166	4.29470381014285	Krt16
ENSMUSG00000034361	3431.63807999859	2.08174170491576	Cpne2
ENSMUSG00000020695	2099.2417261224	-1.68487437978728	Mrc2
ENSMUSG00000032348	2608.10949860189	4.25379823775589	Gsta4
ENSMUSG00000014602	112.435333931507	4.21444987254242	Kif1a
ENSMUSG00000026024	1237.20499200913	2.08429452226684	Als2
ENSMUSG00000042244	475.981206375059	3.14208352681359	Pglyrp3
ENSMUSG00000037580	795.856175428783	2.23794011977369	Gch1
ENSMUSG00000021190	3928.18997369773	2.30260997884057	Lgmn
ENSMUSG00000048232	822.651148236664	2.2354614469812	Fbxo10
ENSMUSG00000031755	714.594976351129	-1.31815642956148	Bbs2
ENSMUSG00000031402	3529.5606531698	1.52780791153812	Mpp1
ENSMUSG00000022475	6617.52718429035	1.75693506434339	Hdac7
ENSMUSG00000015966	424.753446781773	-1.78184282654091	Il17rb
ENSMUSG00000030098	302.598339581306	3.74798833810196	Grip2
ENSMUSG00000079037	10689.4087336964	1.32884133463318	Prnp
ENSMUSG00000057751	2058.03986446351	-2.24137788165535	Megf6
ENSMUSG00000024909	149.617241321775	3.1593902686732	Efemp2
ENSMUSG00000020869	6553.01640983793	1.25170713005173	Lrrc59
ENSMUSG00000031799	20843.7651526478	1.18694746902391	Tpm4
ENSMUSG00000044748	1437.36821224654	2.20904516712086	Defb1
ENSMUSG00000038388	892.916008087878	1.19207950607169	Mpp6
ENSMUSG00000033763	1487.58302992685	-2.15500526816295	Mtss2
ENSMUSG00000000730	116.469602403333	3.0806893999316	Dnmt3l
ENSMUSG00000001870	1234.00452224238	2.25668671911765	Ltbp1
ENSMUSG00000059901	1897.54332092623	-2.94420154030699	Adamts14
ENSMUSG00000058624	1140.4369118625	2.23010297867487	Gda
ENSMUSG00000063694	2445.70860441769	1.06039852820287	Cycs
ENSMUSG00000021591	1030.61088754598	2.21760036398013	Glrx
ENSMUSG00000027332	1591.82237308444	-0.91752507792607	Ivd
ENSMUSG00000005686	2053.05054219423	1.55114185722093	Ampd3
ENSMUSG00000034981	249.153670588702	4.38700338052467	Parm1
ENSMUSG00000034522	1714.1438177337	-1.57540194240995	Zfp395
ENSMUSG00000024078	1401.95879730107	1.0733851752043	Ttc27
ENSMUSG00000018378	1442.42328636276	-1.11988901863677	2210416O15Rik
ENSMUSG00000044813	1435.13112967845	2.20442777460538	Shb
ENSMUSG00000052560	2251.1208218786	1.20714820829943	Cpne8
ENSMUSG00000055368	428.227001527131	-2.95755346758154	Slc6a2
ENSMUSG00000038059	575.263343711287	3.26174197713836	Smim3
ENSMUSG00000040688	2262.94769429691	0.723096788772737	Tbl3
ENSMUSG00000073010	166.417377371972	-2.35580133081904	Gm5127
ENSMUSG00000020116	2105.97107957829	0.902849915511284	Pno1
ENSMUSG00000027227	1396.58052174282	-1.41176190928441	Sord
ENSMUSG00000025212	2365.07269924519	-1.15214490811583	Sfxn3
ENSMUSG00000074151	1383.96779249972	3.16772302049387	Nlrc5
ENSMUSG00000021939	17475.6734038934	1.30425065305673	Ctsb
ENSMUSG00000051048	129.764749014455	5.53279868339762	P4ha3
ENSMUSG00000034220	6886.03617216301	1.15708369484699	Gpc1
ENSMUSG00000075602	9770.72820399271	1.82076205633557	Ly6a
ENSMUSG00000013629	4255.48677853074	1.54748443590914	Cad
ENSMUSG00000021947	411.649681543806	-1.56182138759413	Cryl1
ENSMUSG00000024312	2940.50898252653	0.89402519289409	Wdr46
ENSMUSG00000004462	1094.93633934561	1.4448442516454	Tbccd1
ENSMUSG00000030214	11933.393961978	1.31585198630462	Plbd1
ENSMUSG00000004460	4478.47598768029	1.12944698262269	Dnajb11
ENSMUSG00000004356	2967.06813911395	1.03106771850251	Utp20
ENSMUSG00000030862	998.670191127509	-1.39835623223691	Cpxm2
ENSMUSG00000074577	369.556711011304	-2.48112035369802	Ripor3
ENSMUSG00000031245	1437.02170599708	-1.21239945863824	Hmgn5
ENSMUSG00000031897	716.355012705896	1.76153210220001	Psmb10
ENSMUSG00000050447	126.897821463694	-1.92915253634869	Lypd6
ENSMUSG00000026070	146.652967487339	2.7622198850468	Il18r1
ENSMUSG00000018334	2398.29507895312	1.65664753226825	Ksr1
ENSMUSG00000029761	746.194720516003	3.01196527150381	Cald1
ENSMUSG00000079018	2696.4477674068	1.73894500758075	Ly6c1
ENSMUSG00000031209	801.78208484653	-2.19780418766936	Heph
ENSMUSG00000022557	4618.53660871522	1.10530611500683	Bop1
ENSMUSG00000012350	1750.64551001815	2.11425130781846	Ehf
ENSMUSG00000004270	2720.69082672366	1.20349307969396	Lpcat3
ENSMUSG00000001119	1814.97824067795	-2.08459904551609	Col6a1
ENSMUSG00000040488	7828.94852972225	-1.28976458720823	Ltbp4
ENSMUSG00000042073	1032.74366580341	-1.13172071352267	Abhd14b
ENSMUSG00000026245	2734.58914010221	1.06051329544561	Farsb
ENSMUSG00000026785	673.297842891602	-1.3406817528114	Pkn3
ENSMUSG00000025986	2989.45053658972	1.96995963267006	Slc39a10
ENSMUSG00000030339	1839.70979754199	1.11856099648997	Ltbr
ENSMUSG00000030220	6884.46074390967	1.42126353562208	Arhgdib
ENSMUSG00000025647	5646.02837589036	1.01152596282909	Shisa5
ENSMUSG00000045671	1932.60272018516	-1.28325250465347	Spred2
ENSMUSG00000069769	1147.25291799777	-0.969147694704085	Msi2
ENSMUSG00000018417	980.301337120622	2.65314386054574	Myo1b
ENSMUSG00000039519	345.220621741217	3.0825581840358	Cyp7b1
ENSMUSG00000048915	1382.75530339598	1.5377766712048	Efna5
ENSMUSG00000022769	787.723889031444	1.82876307228414	Sdf2l1
ENSMUSG00000025314	950.0925516882	2.26544838204669	Ptprj
ENSMUSG00000022324	1098.90640023465	-1.74393807923477	Matn2
ENSMUSG00000009900	279.268845969899	-1.66911617884434	Wnt3a
ENSMUSG00000029762	1837.02444252875	1.95356806615411	Akr1b8
ENSMUSG00000053931	1167.0648047161	2.0762919707001	Cnn3
ENSMUSG00000032020	867.278597978629	1.86836846176753	Ubash3b
ENSMUSG00000019848	546.739694898831	-1.16923204442633	Popdc3
ENSMUSG00000029484	383.581312632908	3.36366839977048	Anxa3
ENSMUSG00000028464	8736.77151021492	1.92330746998149	Tpm2
ENSMUSG00000003746	724.083382112071	1.87239820702358	Man1a
ENSMUSG00000001416	8145.27579633306	0.761836125679597	Cct3
ENSMUSG00000097104	79.7337567759726	3.04059505815968	Gm26579
ENSMUSG00000039953	8430.87811751965	-0.912259068426054	Clstn1
ENSMUSG00000029270	467.410958387191	1.74756020416898	Dipk1a
ENSMUSG00000033361	147.100694083786	-2.02235174806775	Prrg3
ENSMUSG00000015970	2797.99396616356	-1.04820874814247	Chdh
ENSMUSG00000030465	997.438282053056	-1.72295778068886	Psd3
ENSMUSG00000014599	1782.71907891513	1.73495833896724	Csf1
ENSMUSG00000047441	79.8818870240903	5.8325233885324	Antxrl
ENSMUSG00000022546	4305.22819202093	-1.51874935569626	Gpt
ENSMUSG00000057614	4990.53356412667	-1.03696002295713	Gnai1
ENSMUSG00000022353	3374.80624408241	1.48569328234792	Mtss1
ENSMUSG00000020455	2702.21408521819	1.11209595103658	Trim11
ENSMUSG00000036306	226.670963464231	-2.07635550007021	Lzts1
ENSMUSG00000093573	63.0165680756588	5.02915944286162	NA
ENSMUSG00000023963	940.492420309993	-1.01087729548844	Cyp39a1
ENSMUSG00000050737	5538.91320566416	1.81070529951031	Ptges
ENSMUSG00000022203	4741.59084933262	-0.914392101224471	Efs
ENSMUSG00000036278	803.997537838984	-1.055562145802	Macrod1
ENSMUSG00000003949	4138.11118432771	-2.00974457506469	Hlf
ENSMUSG00000038736	1376.46119974755	1.17555046874924	Nudcd1
ENSMUSG00000094733	163.482520586654	7.70992655671033	Csta3
ENSMUSG00000030738	13194.936327884	0.568673853950602	Eif3c
ENSMUSG00000025213	331.134533634388	-1.95249572181087	Kazald1
ENSMUSG00000028854	10448.1511252064	1.31151105634834	Slc9a1
ENSMUSG00000027932	9142.84977787125	1.51226956766153	Slc27a3
ENSMUSG00000035557	47148.4461197771	2.2424546021625	Krt17
ENSMUSG00000042286	1725.91728654702	2.07444376965928	Stab1
ENSMUSG00000038650	16447.0236136355	1.03530798728746	Rnh1
ENSMUSG00000028194	111.141930694162	2.98219007970974	Ddah1
ENSMUSG00000032307	3678.23374912057	1.07386181775746	Ube2q2
ENSMUSG00000020484	4281.21244780356	1.14586899071312	Xbp1
ENSMUSG00000024039	680.369642056741	-2.05208503003824	Cbs
ENSMUSG00000063015	6849.24473855077	-0.937431819082727	Ccni
ENSMUSG00000047139	8137.29173865571	1.38231986387985	Cd24a
ENSMUSG00000018537	1917.09309991915	-0.953774589364605	Pcgf2
ENSMUSG00000023048	5227.19322114294	1.41403814341392	Prr13
ENSMUSG00000001441	10306.3417205648	0.918728421619923	Npepps
ENSMUSG00000068551	495.600499598687	-1.49644878824519	Zfp467
ENSMUSG00000024736	1587.84075575519	-1.28615154463143	Tmem132a
ENSMUSG00000026509	5978.69220910536	1.17434846781375	Capn2
ENSMUSG00000020142	1057.4968175924	-1.33027028445876	Slc1a4
ENSMUSG00000020099	1204.30479222634	-1.21529373414521	Unc5b
ENSMUSG00000041560	14553.2834664691	-0.776153050686316	Nop53
ENSMUSG00000071369	1123.11755868386	1.40059142586222	Map3k5
ENSMUSG00000046982	1521.50884716463	-1.19037366219071	Tshz1
ENSMUSG00000023044	1422.17684360302	-1.3096896371209	Csad
ENSMUSG00000054793	233.104710199967	4.17361054381629	Cadm4
ENSMUSG00000021792	4640.32655366217	-2.20808547686716	Prxl2a
ENSMUSG00000050854	1079.31423736797	1.68616872995375	Tmem125
ENSMUSG00000058354	47567.0807364201	4.68783513840554	Krt6a
ENSMUSG00000046719	529.755829902733	-1.76371499000214	Nxph3
ENSMUSG00000022791	6926.80129082027	-0.991001860237586	Tnk2
ENSMUSG00000059248	6181.73384925026	1.31380867708073	2009-09-01
ENSMUSG00000031825	2894.67400683993	2.76832672442932	Crispld2
ENSMUSG00000002319	3054.73374437802	1.16829939801279	Ipo4
ENSMUSG00000006732	1225.91219793558	0.973797872468892	Mettl1
ENSMUSG00000014859	2827.35986417732	0.894373507920713	E2f4
ENSMUSG00000027377	4283.28501886158	1.57676749159666	Mall
ENSMUSG00000027978	326.298461138525	3.55935053907772	Prss12
ENSMUSG00000058260	425.353340938492	2.85279206761774	Serpina9
ENSMUSG00000027422	5358.42123452066	1.05368615751795	Rrbp1
ENSMUSG00000026674	2791.40255154328	2.89959147988015	Ddr2
ENSMUSG00000040463	10641.5438274816	0.888940195764932	Mybbp1a
ENSMUSG00000022471	1386.04688556607	0.820751401701451	Xrcc6
ENSMUSG00000030849	11142.0350560604	-0.875115245859391	Fgfr2
ENSMUSG00000037493	2002.21977908101	-1.63526376589098	Cib2
ENSMUSG00000023041	18313.927811655	8.23661292125607	Krt6b
ENSMUSG00000011752	3083.22832736846	1.14690519029679	Pgam1
ENSMUSG00000046337	192.88526846148	-1.4995235355207	Fam178b
ENSMUSG00000013483	1993.32593094228	2.31735751639252	Card14
ENSMUSG00000048142	4325.08711520559	1.58852601981886	Nat8l
ENSMUSG00000022902	55.6095468041996	4.03982089730369	Stfa2
ENSMUSG00000025969	860.424759577261	2.21511631198657	Nrp2
ENSMUSG00000024120	2980.69392718639	0.853697524778833	Lrpprc
ENSMUSG00000026104	908.260261933627	1.93181251688868	Stat1
ENSMUSG00000022241	4589.22032927029	0.761431045675801	Tars
ENSMUSG00000030834	67.2615617774229	-4.24394628209573	Abcc6
ENSMUSG00000025223	11582.381168574	-1.00028914039367	Ldb1
ENSMUSG00000042851	546.773489858408	-1.90724405110419	Zc3h6
ENSMUSG00000055301	2843.83323508485	-1.97748046985695	Adh7
ENSMUSG00000013415	89.8477168826911	5.37459475176456	Igf2bp1
ENSMUSG00000021803	3378.33361585966	5.08529617533557	Cdhr1
ENSMUSG00000004105	1775.63202882599	-2.39766108449027	Angptl2
ENSMUSG00000027423	5794.84139729413	0.613317319516179	Snx5
ENSMUSG00000027420	154.277126685893	2.66340987213797	Bfsp1
ENSMUSG00000019823	645.725541569762	-1.86820961943311	Mical1
ENSMUSG00000034156	227.464053207102	-1.89466398678542	Tspoap1
ENSMUSG00000016262	2123.59013948774	-1.48628633155854	Sertad4
ENSMUSG00000005873	11632.2904598941	-0.956227607485455	Reep5
ENSMUSG00000025007	3502.58205614452	1.39880338373255	Aldh18a1
ENSMUSG00000035314	389.369669366	-1.29245504704108	Gdpd5
ENSMUSG00000070284	910.367243474874	1.45574967372473	Gmppb
ENSMUSG00000024376	1019.71475891853	1.06214943120461	Epb41l4a
ENSMUSG00000086845	85.3676263286267	2.66613512904019	Gm13010
ENSMUSG00000020891	164.296644272719	3.39531065402666	Alox8
ENSMUSG00000030218	278.29281011902	2.9804295635767	Mgp
ENSMUSG00000025817	3015.38683807163	1.28307391300146	Nudt5
ENSMUSG00000063838	606.473722679469	-1.63588399085037	Cdc42ep5
ENSMUSG00000063060	2815.09672983578	-0.832498948205705	Sox7
ENSMUSG00000025364	10840.1956257341	0.745770904650632	Pa2g4
ENSMUSG00000017999	4259.94999174076	0.58078452605618	Ddx27
ENSMUSG00000022544	1120.01026640801	0.91848726917466	Eef2kmt
ENSMUSG00000027298	4756.6729078448	1.70496182622441	Tyro3
ENSMUSG00000038119	1780.69432401587	-1.33648334337625	Cdon
ENSMUSG00000038522	57.6799220242643	4.04962901707436	Mfsd4b1
ENSMUSG00000022962	3722.06789843304	0.707722528718825	Gart
ENSMUSG00000100183	50.3936749648311	4.5451394590873	NA
ENSMUSG00000031841	2963.53810792895	-1.6328375682401	Cdh13
ENSMUSG00000020866	68.1112525057719	-3.39700226708936	Cacna1g
ENSMUSG00000021266	2118.19044899702	0.877488186554985	Wars
ENSMUSG00000031948	5899.09143750507	0.662750242597005	Kars
ENSMUSG00000029455	5770.89364994764	-0.640167388917836	Aldh2
ENSMUSG00000034055	239.116888871563	-1.73982533255789	Phka1
ENSMUSG00000032038	532.941252520313	2.23958271307105	St3gal4
ENSMUSG00000037720	2799.13319747383	0.888841276838168	Tmem33
ENSMUSG00000053964	611.352155797031	-1.30454655720442	Lgals4
ENSMUSG00000025584	722.494694413653	-1.59757200290657	Pde8a
ENSMUSG00000015224	484.594273244955	-1.47883613523791	Cyp2j9
ENSMUSG00000028034	5260.79546331142	0.964748949698121	Fubp1
ENSMUSG00000023272	2022.70820333531	1.41261328998388	Creld2
ENSMUSG00000030222	83.4241926226464	-3.86522415778985	Rerg
ENSMUSG00000040652	1995.69902015099	-1.33852017180341	Oaz2
ENSMUSG00000085403	102.491278913262	3.72430163693985	NA
ENSMUSG00000031750	3365.57380539059	-1.82147692150821	Il34
ENSMUSG00000046259	466.263496733332	4.4940843572923	Sprr2h
ENSMUSG00000054146	22442.9696543302	-1.92220859876391	Krt15
ENSMUSG00000061458	1353.15251356481	0.973630970912161	Nol10
ENSMUSG00000075028	454.788073181581	-1.23944293334064	Prdm11
ENSMUSG00000046354	116.590414454811	6.11464668149931	Defb14
ENSMUSG00000029321	565.330565826411	2.57794111190537	Slc10a6
ENSMUSG00000041096	982.404410928876	-0.962121723323463	Tspyl2
ENSMUSG00000032434	5609.8305332442	1.01454909045063	Cmtm6
ENSMUSG00000070780	665.508402681848	1.12212285930832	Rbm47
ENSMUSG00000029563	291.374614504189	-1.92714292382644	Foxp2
ENSMUSG00000022564	8377.09156798716	1.371757967767	Grina
ENSMUSG00000016554	6319.6779034118	0.633051512890215	Eif3d
ENSMUSG00000049553	2500.92819973468	1.07213152048908	Polr1a
ENSMUSG00000036356	277.747655084034	-3.46003135845507	Csgalnact1
ENSMUSG00000029063	5356.07071432696	0.757077715667749	Nadk
ENSMUSG00000026749	205.994264523699	2.10350664830024	Nek6
ENSMUSG00000055538	385.368179631837	1.62857538301479	Zcchc24
ENSMUSG00000024165	4023.41983830558	1.04653656035981	Jpt2
ENSMUSG00000021180	196.659085316228	-1.48146884006947	Rps6ka5
ENSMUSG00000055322	3084.48030413823	-2.05424004048777	Tns1
ENSMUSG00000045193	2616.32953423439	-1.77825074714711	Cirbp
ENSMUSG00000037325	277.210787488153	-1.28367070480747	Bbs7
ENSMUSG00000027883	4928.80255741836	-0.938704154817092	Gpsm2
ENSMUSG00000061665	7800.82304699865	0.938878693368905	Cd2ap
ENSMUSG00000033706	1211.17872975978	0.989003664013567	Smyd5
ENSMUSG00000033065	922.041679509562	-1.21963027613999	Pfkm
ENSMUSG00000038175	1858.93294128916	-1.10343477406201	Mylip
ENSMUSG00000051497	81.914850511918	-3.91374831031526	Kcnj16
ENSMUSG00000028173	4116.26633378675	-0.912801028196222	Wls
ENSMUSG00000025558	2906.66308281063	1.03573882688769	Dock9
ENSMUSG00000003849	780.448995624995	2.33543897134752	Nqo1
ENSMUSG00000031845	68.6366132702678	-3.75720319935611	Bco1
ENSMUSG00000079025	5974.03755564442	2.83054815931845	Gsdmc
ENSMUSG00000089647	43.5831242423118	4.40838596590287	LOC102632231
ENSMUSG00000027223	457.208428178345	-1.21943711178717	Mapk8ip1
ENSMUSG00000041126	1439.32178615984	-1.46292860601159	H2afv
ENSMUSG00000048772	74.3192760776111	-2.08814696705947	Tmem53
ENSMUSG00000022206	357.659547751347	-2.14935855200296	Npr3
ENSMUSG00000025780	734.17242611168	-2.34419730908101	Itih5
ENSMUSG00000022199	752.024093150108	-1.15877687436221	Slc22a17
ENSMUSG00000071604	720.866742553845	-1.96063501318153	Fam189a2
ENSMUSG00000036528	1262.98431805359	-1.72401808970897	Ppfibp2
ENSMUSG00000049493	81.143003405041	-2.9061461106199	Pls1
ENSMUSG00000025082	925.783767239158	-1.62562856350914	Vwa2
ENSMUSG00000038776	1968.99250964491	-1.40126057133753	Ephx1
ENSMUSG00000034161	144.729913482118	-2.70392638878535	Scx
ENSMUSG00000030319	208.580186947162	-1.43024543588224	Cand2
ENSMUSG00000031672	6923.77161020329	0.862940455703515	Got2
ENSMUSG00000027940	10756.2502586057	0.656597562514271	Tpm3
ENSMUSG00000027737	906.884213184849	3.14098864556635	Slc7a11
ENSMUSG00000025324	932.077165793703	1.74982825705014	Atp10a
ENSMUSG00000042302	672.918458533154	-1.26566164805782	Ehbp1
ENSMUSG00000025130	19252.9480594597	0.826524915195099	P4hb
ENSMUSG00000006818	3681.98839273214	0.817963849388682	Sod2
ENSMUSG00000029632	4354.61684847248	0.908557617814077	Ndufa4
ENSMUSG00000009418	1286.32023773728	1.86771508716726	Nav1
ENSMUSG00000030643	808.485052247077	-1.26730061671618	Rab30
ENSMUSG00000021830	434.435550808075	-1.90155641291248	Txndc16
ENSMUSG00000004040	16286.9793383077	1.01319731802501	Stat3
ENSMUSG00000017002	1994.44592377586	4.5355125305602	Slpi
ENSMUSG00000004936	2219.44397602058	1.01441028161705	Map2k1
ENSMUSG00000037035	756.689368639187	1.2043157010559	Inhbb
ENSMUSG00000004931	2208.08590391784	0.706904977689181	Apba3
ENSMUSG00000001847	14138.5362460312	0.69421427842497	Rac1
ENSMUSG00000017057	14086.933581762	1.05831819435703	Il13ra1
ENSMUSG00000013846	548.178234347438	2.50709724310209	St3gal1
ENSMUSG00000032115	5858.94345416572	1.40483798968523	Hyou1
ENSMUSG00000061950	4130.37902293797	1.0739403353033	Ppp4r1
ENSMUSG00000023988	1704.48113439604	0.953610032862827	Bysl
ENSMUSG00000027533	40937.6704420418	1.89610570999724	Fabp5
ENSMUSG00000028849	10113.8977715412	1.41492411484363	Map7d1
ENSMUSG00000087516	83.4912366884417	-4.02457383331771	AW549542
ENSMUSG00000054958	57.7158035208809	6.06545100027475	Nt5c1a
ENSMUSG00000021775	5146.47934821892	-0.771366439132138	Nr1d2
ENSMUSG00000003546	644.320724683582	-0.844848065563283	Klc4
ENSMUSG00000020368	12808.8489236368	0.746470511487835	Canx
ENSMUSG00000043673	200.768794132036	2.35827003754852	Kcns3
ENSMUSG00000026131	26624.7122648411	-1.34517195767528	Dst
ENSMUSG00000036169	1317.85174036291	-1.97854516382998	Sostdc1
ENSMUSG00000036718	613.543026148369	-1.08124348009827	Micall2
ENSMUSG00000061981	1470.4688275191	1.68599495091979	Flot2
ENSMUSG00000017221	8747.72612223434	0.740064047125469	Psmd3
ENSMUSG00000090722	94.4601321265455	2.55894602662504	NA
ENSMUSG00000040703	417.520985823317	-1.49061044517629	Cyp2s1
ENSMUSG00000039450	420.460924865522	-1.15549556325573	Dcxr
ENSMUSG00000031403	2900.58243816829	0.795440534203763	Dkc1
ENSMUSG00000001440	11872.3045954072	0.622230889048251	Kpnb1
ENSMUSG00000036943	2590.50412468913	1.24542156965516	Rab8b
ENSMUSG00000026604	5815.70993075929	-1.13340459458381	Ptpn14
ENSMUSG00000032834	1821.35308180584	0.854517382863359	Pwp2
ENSMUSG00000026159	3956.43986693229	0.820514326193957	Agfg1
ENSMUSG00000059182	1865.70803615793	1.42329193347084	Skap2
ENSMUSG00000026657	990.288061368298	-1.07927290624302	Frmd4a
ENSMUSG00000055254	1229.59251697415	-2.21281979414537	Ntrk2
ENSMUSG00000025927	3536.05444095233	-0.797131161934382	Tfap2b
ENSMUSG00000059883	1158.19640139771	1.13549779319843	Irak4
ENSMUSG00000020361	9831.95938668557	0.659460066378667	Hspa4
ENSMUSG00000095567	7653.96089950744	0.80146499794109	Noc2l
ENSMUSG00000023021	2722.40222524362	-0.792404234113444	Cers5
ENSMUSG00000030341	9936.58704915689	0.62196634528767	Tnfrsf1a
ENSMUSG00000002109	1123.45364750099	-0.716359902373433	Ddb2
ENSMUSG00000032666	2951.53565479662	-0.662605911915291	1700025G04Rik
ENSMUSG00000074766	304.162488829493	-2.83116045438667	Ism1
ENSMUSG00000039031	864.011206324071	-1.09459044373176	Arhgap18
ENSMUSG00000032936	89.0557891911182	-2.27451829688795	Camkv
ENSMUSG00000041202	62.9285814875082	2.57345944630587	Pla2g2d
ENSMUSG00000027624	599.896563285027	-1.83762019211612	Epb41l1
ENSMUSG00000007610	998.436119477764	1.15804755934627	Gtpbp3
ENSMUSG00000022906	1011.17989718791	1.80392132172326	Parp9
ENSMUSG00000014551	1320.52923993392	1.34833708773931	Mrps25
ENSMUSG00000083012	1738.8150239664	0.607827830463079	Fam220a
ENSMUSG00000050359	14889.2364712067	2.12017866428332	Sprr1a
ENSMUSG00000040998	1200.40000930649	-2.14564373005406	Npnt
ENSMUSG00000025650	19190.8152414697	-0.941145538372373	Col7a1
ENSMUSG00000025059	1220.22666942541	1.13096924757644	Gk
ENSMUSG00000029541	505.327588802915	-2.53240715002218	Cyp2w1
ENSMUSG00000030609	1510.30739497613	1.0622079753949	Aen
ENSMUSG00000028949	440.257926955701	2.33604373334561	Smarcd3
ENSMUSG00000067194	5424.81981854491	0.596507659864817	Eif1ax
ENSMUSG00000039787	260.861163426172	-2.06667266464849	Cercam
ENSMUSG00000045636	1494.78052588393	-0.841593698558884	Mtus1
ENSMUSG00000037016	919.938930046551	-2.60479099862759	Frem2
ENSMUSG00000020089	3399.80967775597	1.39691909571498	Ppa1
ENSMUSG00000005107	135.41808302298	-2.11263381792011	Slc2a9
ENSMUSG00000010358	1009.60902017607	1.55941716374817	Ifi35
ENSMUSG00000024140	1913.72514378576	-2.04517580381014	Epas1
ENSMUSG00000039081	1901.79795795094	-0.944983789068183	Zfp503
ENSMUSG00000023952	2291.93887534531	-0.505168476483913	Gtpbp2
ENSMUSG00000020388	2346.9845199295	-1.71146577670072	Pdlim4
ENSMUSG00000020571	7793.03997910949	1.14460412632833	Pdia6
ENSMUSG00000058135	2995.05260861914	-1.16188751599026	Gstm1
ENSMUSG00000015932	39005.8017326514	0.886931273530781	Dstn
ENSMUSG00000060073	5480.7620262327	0.521796975951685	Psma3
ENSMUSG00000040557	337.727897060366	-1.46241803493485	Mettl27
ENSMUSG00000042694	512.079679177445	1.05518787425695	Stn1
ENSMUSG00000074445	441.311451277092	4.72088409025661	Sprr2a3
ENSMUSG00000020936	3383.63379089753	0.425464930693139	Nmt1
ENSMUSG00000045038	1056.11210610878	2.24704178702866	Prkce
ENSMUSG00000043668	59.9485167094113	-2.54277575312763	Tox3
ENSMUSG00000029198	2571.44802652235	0.645839436374393	Grpel1
ENSMUSG00000030826	1988.66865220272	-1.04029694487365	Bcat2
ENSMUSG00000025189	115.390269065892	-2.03117723413478	Cnnm1
ENSMUSG00000052135	153.488060047276	-2.31842714350348	Foxo6
ENSMUSG00000030750	1252.65695152393	1.65939299638782	Nsmce1
ENSMUSG00000057963	1208.79726148029	1.40791391464509	Itpk1
ENSMUSG00000055629	185.466398776772	2.30092675402085	B4galnt4
ENSMUSG00000022871	473.345302809909	2.66402453473942	Fetub
ENSMUSG00000071847	1431.88671365087	-1.75771991386842	Apcdd1
ENSMUSG00000021133	3872.61894868298	1.10245919778855	Susd6
ENSMUSG00000072893	420.703831465351	-1.14148790607221	4933439C10Rik
ENSMUSG00000022391	10336.2060805482	0.76573849505462	Rangap1
ENSMUSG00000027551	801.13315392643	-0.746842496285232	Zfp64
ENSMUSG00000034057	67.3164219351352	5.47083273124145	Myrfl
ENSMUSG00000045475	79.4740993187624	4.0340386010336	Lce3c
ENSMUSG00000038065	280.354142914488	-1.69915165436531	Mturn
ENSMUSG00000025823	4276.46960835582	1.24221534482059	Pdia4
ENSMUSG00000031910	1024.33202328849	2.30859373351516	Has3
ENSMUSG00000097059	312.126162277965	-1.30133558707249	NA
ENSMUSG00000030471	1123.16486450407	1.15822714832533	Zdhhc13
ENSMUSG00000018849	3069.35613728659	1.05153014393405	Wwc1
ENSMUSG00000007888	1653.03722990083	-1.31599739519461	Crlf1
ENSMUSG00000025887	607.051823603341	1.92872733814266	Casp12
ENSMUSG00000020238	3462.50676355434	0.907353636456285	Ncln
ENSMUSG00000028953	4778.70057708626	0.768774961914792	Abcf2
ENSMUSG00000030748	3648.34278013199	1.96709565964084	Il4ra
ENSMUSG00000062203	6887.03946807221	0.788813682974743	Gspt1
ENSMUSG00000031740	1909.4204362411	-1.35500109132724	Mmp2
ENSMUSG00000029154	2561.26417886379	1.03221611622157	Cwh43
ENSMUSG00000033991	3372.47503005064	1.42067741196923	Ttc37
ENSMUSG00000036882	908.110323543783	-0.951706233375397	Arhgap33
ENSMUSG00000001424	5635.75803558457	0.920770294503373	Snd1
ENSMUSG00000050063	251.922301287792	3.28843091243534	Klk6
ENSMUSG00000062937	942.395114314881	1.08748495245369	Mtap
ENSMUSG00000019102	5848.09862100102	-1.67093348174935	Aldh3a1
ENSMUSG00000026696	1668.97832352386	1.09594443694657	Vamp4
ENSMUSG00000000120	480.021302588447	-1.49848844990323	Ngfr
ENSMUSG00000005583	115.953061528567	-2.37239886586167	Mef2c
ENSMUSG00000021876	4911.7632366856	-0.753270322594086	Rnase4
ENSMUSG00000035941	1852.22470352301	0.696614323153603	Ibtk
ENSMUSG00000031298	432.601443256594	1.36482036603022	Adgrg2
ENSMUSG00000021131	2092.00617943887	0.787437941215365	Erh
ENSMUSG00000020381	199.942502553468	-1.49012156760264	Mrnip
ENSMUSG00000030768	294.344105074138	-1.39549010475884	Disp1
ENSMUSG00000062867	9344.81097454392	0.762822538165964	Impdh2
ENSMUSG00000041287	610.294652960754	-1.33459434614798	Sox15
ENSMUSG00000040263	1717.81715432202	0.691008027261597	Klhdc4
ENSMUSG00000026991	3914.14118095851	0.971792026542616	Pkp4
ENSMUSG00000019849	4371.72485696943	0.878173399566453	Prep
ENSMUSG00000040432	1613.41102955925	1.37436165655147	Ltb4r2
ENSMUSG00000029561	541.726455550871	5.31179613572519	Oasl2
ENSMUSG00000028583	514.217359161696	2.81491012526621	Pdpn
ENSMUSG00000024501	2258.80148785096	-1.72761981536503	Dpysl3
ENSMUSG00000030340	2772.4019319083	1.69696430080206	Scnn1a
ENSMUSG00000057337	1345.27764686773	-1.35237399416711	Chst3
ENSMUSG00000017754	618.699312301013	-1.49268852157074	Pltp
ENSMUSG00000024948	1538.76145470989	-1.09111001951012	Map4k2
ENSMUSG00000021604	1761.09953432563	-1.78077435674055	Irx4
ENSMUSG00000054263	1068.03193953621	-1.59185834326454	Lifr
ENSMUSG00000033721	3350.40306374448	0.640029329860067	Vav3
ENSMUSG00000029752	3336.96430014736	1.01751668960331	Asns
ENSMUSG00000001911	17830.3531431002	-0.63316939418486	Nfix
ENSMUSG00000026914	3450.40164724898	0.55324225659251	Psmd14
ENSMUSG00000059810	389.632099554669	-1.53192770193251	Rgs3
ENSMUSG00000009248	200.229845070375	-1.98494933023054	Ascl2
ENSMUSG00000017715	5634.3581313639	0.966629448696345	Pgs1
ENSMUSG00000047797	63.1776806580589	6.4450371772341	Gjb1
ENSMUSG00000038236	1706.09839867447	-0.938343130255736	Hoxa7
ENSMUSG00000038991	3396.35338771312	0.892763840143405	Txndc5
ENSMUSG00000013275	2190.09741967957	1.22356916622658	Slc41a1
ENSMUSG00000042500	2051.96613934052	-0.973878769351575	Ago4
ENSMUSG00000032092	6403.55988383316	1.05402471460754	Mpzl2
ENSMUSG00000038507	955.891244866493	1.71823108096293	Parp12
ENSMUSG00000078664	50.2195477346551	4.36482050337205	Sprr2a1
ENSMUSG00000022378	1499.41261440142	1.0768545312908	Fam49b
ENSMUSG00000029162	443.776288949633	-1.37137135386091	Khk
ENSMUSG00000021116	4362.01757074456	0.885829411441223	Eif2s1
ENSMUSG00000003235	4210.20888539946	0.679716990271119	Eif2b5
ENSMUSG00000005087	24861.4514480674	1.1277410791575	Cd44
ENSMUSG00000024026	5444.11187266193	1.05210684784265	Glo1
ENSMUSG00000109145	41.2315449883421	5.05076967037936	Gm20744
ENSMUSG00000025268	342.313228012242	-1.15973258872768	Maged2
ENSMUSG00000021375	3983.43407863962	-1.03080500117992	Kif13a
ENSMUSG00000059824	5515.549523986	-1.48764534408172	Dbp
ENSMUSG00000027215	2079.94166407316	-1.17755613595995	Cd82
ENSMUSG00000028937	232.575990994569	1.79825925393582	Acot7
ENSMUSG00000029622	4744.77497196969	0.953933054144738	Arpc1b
ENSMUSG00000055980	373.310537045898	-1.19119403507273	Irs1
ENSMUSG00000090216	66.5437533639768	6.52919140001897	NA
ENSMUSG00000002395	3889.94428724505	-0.629490075623174	Use1
ENSMUSG00000028633	2117.10272165807	0.779253274991599	Ctps
ENSMUSG00000060166	1241.04702269633	-0.862610448436072	Zdhhc8
ENSMUSG00000075700	4734.34514197298	0.477525003206613	Selenot
ENSMUSG00000020864	2467.087597065	-0.577510687598856	Ankrd40
ENSMUSG00000024193	969.940082104918	-1.00392026279385	Phf1
ENSMUSG00000029594	1245.19384194375	0.946211610119976	Rbm19
ENSMUSG00000003814	27556.498671829	1.13762015781476	Calr
ENSMUSG00000050244	2629.07859435673	1.26770077969843	Heatr1
ENSMUSG00000079604	157.6656993166	-1.93241618666801	Gm13219
ENSMUSG00000006127	2252.74015658891	-0.831227473442183	Inpp5k
ENSMUSG00000032735	260.523687371806	-1.71236522475186	Ablim3
ENSMUSG00000060548	4162.96954349525	-1.32998882355679	Tnfrsf19
ENSMUSG00000005103	10582.718174364	0.981102432056709	Wdr1
ENSMUSG00000021583	1811.67178819051	1.36080311686701	Erap1
ENSMUSG00000006442	3822.86339649081	0.999014714628617	Srm
ENSMUSG00000047379	1154.29414313089	1.11086388285624	B4gat1
ENSMUSG00000026127	2596.71421214807	0.681404294802312	Imp4
ENSMUSG00000042793	1898.68595947028	-1.82217863391156	Lgr6
ENSMUSG00000021360	3205.85823229434	1.19562340209882	Gcnt2
ENSMUSG00000024493	3571.62093274996	0.725301136184753	Lars
ENSMUSG00000032254	1639.51940980699	-1.38244601221765	Kif23
ENSMUSG00000058006	3097.8456557573	1.34206068668801	Mdn1
ENSMUSG00000049811	67.1630857928157	-2.31049663921222	Fam161a
ENSMUSG00000002812	6346.68801386307	0.816919318659413	Flii
ENSMUSG00000069662	2543.04852352889	1.33175960153916	Marcks
ENSMUSG00000033227	315.67639017442	-1.90680513243471	Wnt6
ENSMUSG00000099812	54.0346546071296	2.43728745050036	NA
ENSMUSG00000086448	738.845209472092	-1.43572850118395	NA
ENSMUSG00000062210	2425.4772691635	-0.862202918935669	Tnfaip8
ENSMUSG00000040033	2204.35155217912	1.65519638960988	Stat2
ENSMUSG00000078652	6718.46936927897	0.592587514701917	Psme3
ENSMUSG00000004771	6246.07847204605	0.908643265205261	Rab11a
ENSMUSG00000024066	7062.88186221804	1.67141680141839	Xdh
ENSMUSG00000034127	223.716382439656	2.34097220762873	Tspan8
ENSMUSG00000022792	649.574005882839	0.830777602348496	Yars2
ENSMUSG00000018566	249.558898014002	-1.95841198456632	Slc2a4
ENSMUSG00000022091	664.697580678	-1.16441374239927	Sorbs3
ENSMUSG00000052419	1606.10662313493	0.890110479935268	2610001J05Rik
ENSMUSG00000041954	1259.39252347344	1.54294003575446	Tnfrsf18
ENSMUSG00000056054	752.229389831819	6.47362636092042	S100a8
ENSMUSG00000043079	742.8014429498	1.69059353421512	Synpo
ENSMUSG00000037306	693.834972302964	-1.72154196504225	Man1c1
ENSMUSG00000040123	2221.73201975997	-0.58431225042379	Zmym5
ENSMUSG00000022843	746.920059640531	-0.982187477277269	Clcn2
ENSMUSG00000028430	4185.98867554396	0.69574033046508	Nol6
ENSMUSG00000056071	1662.44755027621	5.70275616875577	S100a9
ENSMUSG00000029175	2146.12231968129	1.07355572263767	Slc35f6
ENSMUSG00000039096	392.050355721403	-1.03311155668307	Rsad1
ENSMUSG00000040354	3229.13252167677	0.597177668755926	Mars
ENSMUSG00000037275	1752.68457119108	0.830059205856283	Gemin5
ENSMUSG00000031785	10305.6745562665	0.947960051869327	Adgrg1
ENSMUSG00000040274	2994.15975138361	0.905684375519783	Cdk6
ENSMUSG00000029468	532.373697849451	-1.2292943032739	P2rx7
ENSMUSG00000010554	1673.26026695091	0.715849333772471	Mettl16
ENSMUSG00000044139	46.4763979015107	2.82767449516106	Prss53
ENSMUSG00000020064	3246.19476439588	0.72964682977126	Herc4
ENSMUSG00000024997	527.064208817056	0.972657844539049	Prdx3
ENSMUSG00000013662	3648.20989380414	0.606504931293912	Atad1
ENSMUSG00000005813	2342.22117912246	0.751896722192932	Metap1
ENSMUSG00000034858	842.779080868178	-1.3550455772642	Fam214a
ENSMUSG00000003378	254.70625550229	-1.22499830433577	Grik5
ENSMUSG00000030695	23826.8488690363	0.841265680411235	Aldoa
ENSMUSG00000020472	1052.74831528668	-0.868150317806275	Zkscan17
ENSMUSG00000073599	173.7956298193	3.71996538296874	Ecscr
ENSMUSG00000002017	1300.80598973707	0.978843115273251	Fam98a
ENSMUSG00000047264	385.817111039565	-1.31481920653802	Zfp358
ENSMUSG00000004056	5156.72166236714	0.451009770386641	Akt2
ENSMUSG00000040265	73.2390127742067	-2.22113505714548	Dnm3
ENSMUSG00000029467	17644.7985875439	1.04737374794686	Atp2a2
ENSMUSG00000068874	261.09878478025	-1.77682414513754	Selenbp1
ENSMUSG00000021572	175.041061097704	-1.36646437416958	Cep72
ENSMUSG00000028656	12735.8196266085	0.980406922728341	Cap1
ENSMUSG00000028811	2683.50489077447	0.948656041035707	Yars
ENSMUSG00000035095	3061.49327365743	1.9277936047072	Fam167a
ENSMUSG00000031168	3173.3600682264	1.02002005208295	Ebp
ENSMUSG00000024985	500.676380083609	-1.02089051644644	Tcf7l2
ENSMUSG00000074238	4757.1794817585	0.767466669117767	Ap1ar
ENSMUSG00000028617	2088.73269040111	0.808679777839451	Lrrc42
ENSMUSG00000058498	38.0370261205818	3.39071685458395	Rnf207
ENSMUSG00000020032	1279.11881221397	-1.44765404882829	Nuak1
ENSMUSG00000031490	1659.23539002671	1.05779670250902	Eif4ebp1
ENSMUSG00000035969	134.066309171741	2.76980442045336	Rusc2
ENSMUSG00000015094	2078.359908791	0.915307077101532	Npdc1
ENSMUSG00000033209	324.06505397954	-2.179206232933	Ttc28
ENSMUSG00000040631	2500.91242656632	-1.45432210808274	Dok4
ENSMUSG00000028186	137.084667165054	6.57072467689365	Uox
ENSMUSG00000034424	1112.09177869378	1.14196163201037	Gcsh
ENSMUSG00000048376	748.394502442137	-1.24668864933575	F2r
ENSMUSG00000041120	2546.59167351304	-1.24051939284897	Nbl1
ENSMUSG00000026271	638.812106922646	1.98794317004703	Gpr35
ENSMUSG00000019173	12646.7985874735	0.707569320953171	Rab5c
ENSMUSG00000030087	94.3216980003373	-1.88966355104705	Klf15
ENSMUSG00000029802	2070.31147259016	1.35625034587388	Abcg2
ENSMUSG00000022389	8127.13020023315	-0.957489261516952	Tef
ENSMUSG00000022561	3566.47055346436	0.77591116909831	Gpaa1
ENSMUSG00000022551	5122.29863084123	0.594086492025627	Cyc1
ENSMUSG00000022136	2845.13783977118	0.734944092152517	Dnajc3
ENSMUSG00000022982	2324.59134265857	-1.26747673699686	Sod1
ENSMUSG00000024640	6233.64648706848	-0.926244778671002	Psat1
ENSMUSG00000024404	5671.06204802621	0.623424508681131	Riok3
ENSMUSG00000026469	1898.52258381619	0.99784091865606	Xpr1
ENSMUSG00000031489	152.979597967753	-1.78067153240835	Adrb3
ENSMUSG00000022443	26852.0649541769	1.10268299432022	Myh9
ENSMUSG00000004393	2458.52235584194	0.696789015093984	Ddx56
ENSMUSG00000039886	920.34956637085	0.824616016732036	Tmem120a
ENSMUSG00000042660	1193.94126172691	1.00211182922283	Wdr55
ENSMUSG00000078954	107.440389516662	2.9639415423055	Arhgap8
ENSMUSG00000063317	1288.99817980921	0.968317758702824	Usp31
ENSMUSG00000051323	268.029173743611	-2.03000756278275	Pcdh19
ENSMUSG00000064090	890.196909463679	-0.756157934891049	Vrk2
ENSMUSG00000040591	437.762412195749	-1.0253842587758	1110051M20Rik
ENSMUSG00000034687	253.874872585476	-2.33389958706983	Fras1
ENSMUSG00000020706	5047.01335601425	0.744075590877518	Ftsj3
ENSMUSG00000027859	344.858656560917	2.39126307231408	Ngf
ENSMUSG00000102440	76.5191381157865	1.97351762357269	Pcdhga9
ENSMUSG00000100546	34.3707486888368	4.70002615467837	NA
ENSMUSG00000036309	10270.6150767728	0.849262625542113	Skp1a
ENSMUSG00000022253	481.395344177004	-1.15711187612753	Nadk2
ENSMUSG00000025026	1660.35362834936	-0.987803941339024	Add3
ENSMUSG00000022407	2213.52171915014	0.682398510916928	Adsl
ENSMUSG00000005378	1545.98713862525	0.637806619591957	Bud23
ENSMUSG00000042659	1752.95497739138	1.11963546604384	Arrdc4
ENSMUSG00000058290	1245.1250519845	-1.01633118556952	Espl1
ENSMUSG00000045136	815.344685952124	2.0668308014611	Tubb2b
ENSMUSG00000024349	631.585785548639	3.73842850697261	Tmem173
ENSMUSG00000024485	316.765376669557	-2.14213678697732	Slc4a9
ENSMUSG00000028862	2954.27611290791	1.08555076383615	Map3k6
ENSMUSG00000025465	3724.85426981796	-0.725397213817102	Echs1
ENSMUSG00000026986	157.456748898024	-1.48631511146861	Hnmt
ENSMUSG00000004665	5081.86273303158	1.05725426766315	Cnn2
ENSMUSG00000025613	10801.3126723012	0.594665156507667	Cct8
ENSMUSG00000027248	20266.8540895553	0.814726018396653	Pdia3
ENSMUSG00000021223	610.223896159455	-2.15000492083754	Papln
ENSMUSG00000008373	2450.04132201671	0.853555098616918	Prpf31
ENSMUSG00000023885	1264.57558674255	-1.54411123808868	Thbs2
ENSMUSG00000025150	1068.00748871802	-1.20221856695988	Cbr2
ENSMUSG00000057766	485.540298107162	-1.13181232120682	Ankrd29
ENSMUSG00000003808	2566.39370289361	0.745786902751112	Farsa
ENSMUSG00000044348	116.262607968575	-1.34396147447565	Slc25a53
ENSMUSG00000023064	207.971919973689	-2.40370073420248	Sncg
ENSMUSG00000038949	1837.5927192385	-0.802738050566973	Cnst
ENSMUSG00000006219	164.596505342842	2.50984166758049	Fblim1
ENSMUSG00000058392	1782.6292072309	0.977577559657166	Rrp1b
ENSMUSG00000020464	1852.3152063822	0.841147099994415	Pnpt1
ENSMUSG00000024883	3825.14836328103	1.39363860610756	Rin1
ENSMUSG00000039765	848.018798533814	-0.908028066020645	Cc2d2a
ENSMUSG00000074183	103.942936440529	2.27403272679801	Gsta1
ENSMUSG00000058355	5700.015940242	0.808977602276848	Abce1
ENSMUSG00000029710	2918.39148136582	-0.639981199880594	Ephb4
ENSMUSG00000041506	2160.39418246749	0.783800787053231	Rrp9
ENSMUSG00000056076	14951.023107557	0.65174982667204	Eif3b
ENSMUSG00000031232	1906.46450925903	0.823371861008041	Magt1
ENSMUSG00000021737	3410.30339399984	0.500884990395472	Psmd6
ENSMUSG00000022774	2057.88316902443	0.694356240397609	Ncbp2
ENSMUSG00000040327	421.779676443247	-1.46649627819107	Cul9
ENSMUSG00000060002	289.219576316949	-1.45214775693027	Chpt1
ENSMUSG00000061533	652.724511857484	1.48308200954924	Cep128
ENSMUSG00000021340	1068.69549041237	-1.34628614897889	Gpld1
ENSMUSG00000062070	6620.3785430754	1.24790896787875	Pgk1
ENSMUSG00000078451	94.1908013998357	-3.1288680369817	Ppil6
ENSMUSG00000052310	4732.95609817112	0.741317763536241	Slc39a1
ENSMUSG00000026615	7523.82850370586	0.965224265681196	Eprs
ENSMUSG00000003234	1917.24444740199	0.553708322348615	Abcf3
ENSMUSG00000000957	5175.54876529342	-0.774530312407536	Mmp14
ENSMUSG00000000037	325.776856751893	-1.35875951268138	Scml2
ENSMUSG00000030298	3342.29479206621	0.551728526207832	Sec13
ENSMUSG00000038279	2852.27222328135	0.815516506753239	Nop2
ENSMUSG00000074415	501.956196297966	1.1362888546452	Mir100hg
ENSMUSG00000042303	664.455951669302	0.785388907098368	Sgsm3
ENSMUSG00000031207	13693.6403013059	1.18219350490257	Msn
ENSMUSG00000026019	1413.51195390699	0.773461257125306	Wdr12
ENSMUSG00000076498	819.562467765898	1.30694962593494	NA
ENSMUSG00000034990	51.6074517063726	-2.06547813635035	Otoa
ENSMUSG00000021259	51.0886515094768	-2.77447452968703	Cyp46a1
ENSMUSG00000031757	11387.1700960173	-1.9855680220408	Mt4
ENSMUSG00000020661	1266.05137133785	-0.784661252014503	Dnmt3a
ENSMUSG00000058672	5759.01659237041	1.4600723532006	Tubb2a
ENSMUSG00000028932	4091.79019138353	0.424127988907053	Psmc2
ENSMUSG00000029581	939.562890884424	2.22332334134883	Fscn1
ENSMUSG00000019579	1546.49228988539	0.683000321739285	Mydgf
ENSMUSG00000035275	73.2075740467508	-1.95282338140237	Raver2
ENSMUSG00000030731	128.547538534849	-1.70870049849628	Syt3
ENSMUSG00000006998	12298.6406534513	0.617136690281216	Psmd2
ENSMUSG00000025041	854.731805685651	-0.859424519234078	Nt5c2
ENSMUSG00000035049	2451.3643909644	1.07129800828392	Rrp12
ENSMUSG00000028757	4700.4461013956	0.619994419367216	Ddost
ENSMUSG00000022519	135.846961291617	2.30704439764933	Srl
ENSMUSG00000020334	3775.83813023868	-1.24332746114043	Slc22a4
ENSMUSG00000019872	662.441922055855	-1.18302419325457	Smpdl3a
ENSMUSG00000097178	100.319750108672	-1.99890067904124	2310002F09Rik
ENSMUSG00000028613	451.483678322361	1.61438220943256	Lrp8
ENSMUSG00000033629	2803.85832046374	0.627756385647359	Hacd3
ENSMUSG00000014873	1664.56363880474	0.767966422206359	Surf2
ENSMUSG00000044927	486.240341008132	-1.92364583877386	H1f10
ENSMUSG00000029714	3059.75512038295	-0.678865247729328	Gigyf1
ENSMUSG00000022403	4667.95699203716	0.561034035505124	St13
ENSMUSG00000079523	5503.2665362739	1.26039065757599	Tmsb10
ENSMUSG00000028745	9727.99139293542	0.54334428807746	Capzb
ENSMUSG00000058444	979.746294336648	-0.528861501541768	Map2k5
ENSMUSG00000026176	4537.96090978748	-0.451028963506618	Ctdsp1
ENSMUSG00000028452	13841.8329449457	0.423195646566248	Vcp
ENSMUSG00000067367	1952.45069693986	0.920567935849051	Lyar
ENSMUSG00000030872	2282.96248835171	-1.14829254626577	Gga2
ENSMUSG00000025158	2517.84514902546	1.05042301876723	Rfng
ENSMUSG00000038213	980.898195711263	0.763804983340497	Tapbpl
ENSMUSG00000025464	903.042550333201	-0.845247828048916	Paox
ENSMUSG00000024875	2041.70927116768	0.720553417085705	Yif1a
ENSMUSG00000028463	272.478400708266	2.85934769933726	Car9
ENSMUSG00000052593	4087.49533728469	0.692055044991399	Adam17
ENSMUSG00000091337	2313.57389692427	-0.775272220093618	Eid1
ENSMUSG00000073758	1439.88290166686	-1.29273969255585	Sh3d21
ENSMUSG00000025429	129.901094935937	1.79892327202334	Pstpip2
ENSMUSG00000059336	57.2521448186705	-2.58428079287292	Slc14a1
ENSMUSG00000020424	845.505596516945	-0.691498003528283	Castor1
ENSMUSG00000046203	48.7137784258505	4.79152870660952	Sprr2g
ENSMUSG00000023032	769.006957782635	1.47380064529104	Slc4a8
ENSMUSG00000038116	997.909560581533	-0.857847667215454	Phf20
ENSMUSG00000035704	779.625056151831	0.886338800852146	Alg8
ENSMUSG00000033545	3059.50221958192	-0.753057910419467	Znrf1
ENSMUSG00000004044	6814.23013770559	-0.913452261880502	Cavin1
ENSMUSG00000030657	547.284196428899	1.41999180217424	Xylt1
ENSMUSG00000052821	289.031340180416	-1.51433206168851	Cysltr1
ENSMUSG00000001120	393.016775089639	1.29585635814266	Pcbp3
ENSMUSG00000025544	4701.28658945033	0.602315978686337	Tm9sf2
ENSMUSG00000053746	654.636489633184	1.6685798289431	Ptrh1
ENSMUSG00000029769	138.139245802218	-1.87917059732555	Ccdc136
ENSMUSG00000022146	2420.46632679725	1.22361243265431	Osmr
ENSMUSG00000042249	1367.54921721887	1.01862863555192	Grk3
ENSMUSG00000020075	8814.47612028523	0.868400977765887	Ddx21
ENSMUSG00000001665	505.252003690704	-1.05897246336601	Gstt3
ENSMUSG00000029816	418.529574540647	-1.73208075459797	Gpnmb
ENSMUSG00000026411	568.667826786849	-0.819505969017931	Tmem9
ENSMUSG00000048537	1081.96897491106	-1.87035311419441	Phldb1
ENSMUSG00000038618	1884.03659824608	-0.798101036450714	Rassf7
ENSMUSG00000039879	2817.25694995224	-0.56185350268897	Heca
ENSMUSG00000060275	347.743383418186	-1.68143284014311	Nrg2
ENSMUSG00000027889	1945.69219670716	0.822247232689864	Ampd2
ENSMUSG00000021037	3471.49838853325	0.809334226376063	Ahsa1
ENSMUSG00000045679	1311.51424644032	-0.861006972716757	Pqlc3
ENSMUSG00000016918	145.059732073932	-2.80759234836096	Sulf1
ENSMUSG00000038578	221.556114430783	1.45436206590677	Susd1
ENSMUSG00000045761	605.186063837592	1.68683479101182	Togaram2
ENSMUSG00000031628	1479.38186747136	1.01077428949212	Casp3
ENSMUSG00000031379	479.893286181117	-1.10696596848005	Pir
ENSMUSG00000020839	104.269580814844	2.56872358091483	Tmigd1
ENSMUSG00000020961	1055.72665460124	1.41149072668772	Ston2
ENSMUSG00000051098	440.372712124599	-0.914207577821554	Mblac2
ENSMUSG00000023232	3191.75443975029	1.23649597210263	Serinc2
ENSMUSG00000028799	1301.223113442	-0.79882927190665	Zfp362
ENSMUSG00000009681	2338.95353606137	0.813794269162383	Bcr
ENSMUSG00000027864	8273.27998225402	0.800872714858163	Ptgfrn
ENSMUSG00000048310	898.28944439214	-0.912887975839814	Pskh1
ENSMUSG00000062785	497.92376556461	1.65671996763127	Kcnc3
ENSMUSG00000020899	1525.79778043178	0.676476410099388	Pfas
ENSMUSG00000017756	1970.74985189753	1.51850826298617	Slc12a7
ENSMUSG00000041147	922.850782391926	0.957603830243617	Brca2
ENSMUSG00000038539	4062.25082952017	1.03905592471388	Atf5
ENSMUSG00000024829	1289.67580664707	0.593031610147769	Mrpl21
ENSMUSG00000026005	1830.7017859193	0.667941008816521	Rpe
ENSMUSG00000001604	52.2327794732874	-3.17683919495332	Tcea3
ENSMUSG00000002997	369.364553231008	-1.37980470065072	Prkar2b
ENSMUSG00000018848	3382.64716421502	0.575212363590703	Rars
ENSMUSG00000074748	3069.51150321345	0.461699136839412	Atxn7l3b
ENSMUSG00000063160	837.852246493906	-1.3576990571076	Numbl
ENSMUSG00000013701	2191.6896110265	0.532129736342806	Timm23
ENSMUSG00000040028	2898.43193839647	0.519985497307328	Elavl1
ENSMUSG00000061048	4808.57506326461	1.1690464132724	Cdh3
ENSMUSG00000027637	3437.52697344428	0.52333971439011	Rab5if
ENSMUSG00000033272	3632.27651752079	0.51608148750434	Slc35a4
ENSMUSG00000032583	1978.81479039362	0.794948850041033	Mon1a
ENSMUSG00000042642	1277.81343107053	0.802273654940418	Flad1
ENSMUSG00000079014	498.692722359593	1.75282216896371	Serpina3i
ENSMUSG00000055172	278.731860501042	1.76046697559122	C1ra
ENSMUSG00000014959	4381.13947124024	0.541379861022868	Gorasp2
ENSMUSG00000035754	2066.1936142063	0.578647763717512	Wdr18
ENSMUSG00000030045	1147.22166565343	0.624190881281816	Mrpl19
ENSMUSG00000000085	1143.61565000246	-0.907861351303094	Scmh1
ENSMUSG00000029472	9728.49148831785	-0.453645657162112	Anapc5
ENSMUSG00000042719	4876.38473519103	1.32164387937075	Naa25
ENSMUSG00000031834	5825.21809360286	-0.838138713707926	Pik3r2
ENSMUSG00000024952	5238.37711265213	0.650378735149014	Rps6ka4
ENSMUSG00000021193	2937.50147702031	0.798534413407856	Pitrm1
ENSMUSG00000024587	6831.97629585441	0.694901297009283	Nars
ENSMUSG00000004187	341.717377835418	-1.34436834579667	Kifc2
ENSMUSG00000006494	2440.66961861361	-0.769861045790441	Pdk1
ENSMUSG00000030256	695.091901106637	-1.39198883124617	Bhlhe41
ENSMUSG00000020808	331.759073348118	-1.93408519016568	Pimreg
ENSMUSG00000028121	748.574581940051	1.16719170314274	Bcar3
ENSMUSG00000046352	7305.55405855108	3.65649203622181	Gjb2
ENSMUSG00000079426	3805.72170507633	0.547642361272556	Arpc4
ENSMUSG00000022261	477.408910061673	-0.816251047316769	Sdc2
ENSMUSG00000027774	2224.4960410453	0.545420996967135	Gfm1
ENSMUSG00000040254	1952.37069022734	-3.0471917471089	Sema3d
ENSMUSG00000002325	1890.99002414037	1.05378920663544	Irf9
ENSMUSG00000057497	999.801044707574	0.940524223219747	Fam136a
ENSMUSG00000031562	876.386747712513	1.1214505933417	Dctd
ENSMUSG00000064246	224.728618964608	2.58231981216432	Chil1
ENSMUSG00000079563	51.1462333079068	4.06564470160876	Pglyrp2
ENSMUSG00000026638	13230.0184292301	0.787196719430393	Irf6
ENSMUSG00000024083	2030.10244405727	-0.575214960965795	Pja2
ENSMUSG00000022848	706.887547760673	-0.817755365521911	Slc49a4
ENSMUSG00000022325	569.396249297026	0.998241119348345	Pop1
ENSMUSG00000022994	1691.31177874178	-0.80544404194572	Adcy6
ENSMUSG00000032002	2382.10720948911	0.517988184202827	Dcun1d5
ENSMUSG00000001918	1066.2768171031	0.972460516346622	Slc1a5
ENSMUSG00000025128	33.9162968964218	5.74076861464902	Bhlhe22
ENSMUSG00000029999	1151.52296700381	2.0844927711923	Tgfa
ENSMUSG00000030088	672.06913771943	1.2491309008074	Aldh1l1
ENSMUSG00000022019	2222.67412800129	-0.666325106022346	Tdrd3
ENSMUSG00000020412	2414.67340268634	0.501462936669498	Ascc2
ENSMUSG00000022841	7335.68545138751	0.524065498463447	Ap2m1
ENSMUSG00000001674	2027.56712823328	0.649332399515897	Ddx18
ENSMUSG00000028551	1291.72570662217	-0.90267458541745	Cdkn2c
ENSMUSG00000028156	3421.44860761113	0.666256431072425	Eif4e
ENSMUSG00000037851	3471.28277069866	0.866334442094012	Iars
ENSMUSG00000032116	4725.16300143374	0.630994459146642	Stt3a
ENSMUSG00000032598	1056.0838864536	0.874529336527174	Nckipsd
ENSMUSG00000036412	332.996763236757	-1.84491004380965	Arsi
ENSMUSG00000028412	4753.44190019771	-0.61253742807613	Slc44a1
ENSMUSG00000031024	1054.84528847258	1.13532480436453	St5
ENSMUSG00000063884	2102.43257258935	0.597414956894452	Ptcd3
ENSMUSG00000034616	6021.23906493765	0.847577328840226	Ssh3
ENSMUSG00000031214	670.051624409067	-1.31032849236741	Ophn1
ENSMUSG00000033985	185.275321125251	-1.64522890777044	Tesk2
ENSMUSG00000001376	1704.5801684991	0.556657871953634	Vps50
ENSMUSG00000055319	1963.73507325774	0.611058708652144	Sec23ip
ENSMUSG00000017428	3661.49340072111	0.546365495061074	Psmd11
ENSMUSG00000001288	14422.0704076324	-0.795959969146723	Rarg
ENSMUSG00000032411	1324.9966135902	-0.852235438968972	Tfdp2
ENSMUSG00000030718	1867.86132561453	0.708322647413098	Ppme1
ENSMUSG00000032017	61.4000740957922	-3.62002072697058	Grik4
ENSMUSG00000029094	1252.51378306262	1.0655553256734	Afap1
ENSMUSG00000019188	3859.69523791405	0.721916829185069	H13
ENSMUSG00000025912	306.389298929317	-1.37101688471327	Mybl1
ENSMUSG00000024308	4530.6466520538	0.824740760928712	Tapbp
ENSMUSG00000053399	45.4240339887835	-4.49742845559699	Adamts18
ENSMUSG00000017631	3592.33713884957	-0.955280994073514	Abr
ENSMUSG00000024248	5279.06738795342	-0.651895369701282	Cox7a2l
ENSMUSG00000049971	757.502800475396	1.12281531942432	Glt1d1
ENSMUSG00000056131	615.37080536755	0.79885741531819	Pgm3
ENSMUSG00000041620	58.9054442844873	3.48684409848153	Mmp1b
ENSMUSG00000050382	192.758605995059	-1.32879633572865	Kif7
ENSMUSG00000022995	8218.32139839359	1.1520311232996	Enah
ENSMUSG00000048027	1700.23679161977	-0.784285967372678	Rgmb
ENSMUSG00000046718	253.964454586288	2.48004910677673	Bst2
ENSMUSG00000020547	2864.72871117513	0.526391136718214	Bzw2
ENSMUSG00000103749	68.373027118264	2.00052980996982	Pcdhgb5
ENSMUSG00000070639	1335.49423763088	-0.782388369326937	Lrrc8b
ENSMUSG00000041459	11013.8145266354	0.62153685256796	Tardbp
ENSMUSG00000040550	1958.18409448925	0.435881318502623	Otud6b
ENSMUSG00000019590	3922.57589475446	0.806048204474964	Cyb561
ENSMUSG00000048458	854.907168348953	-1.01584830315906	Inka2
ENSMUSG00000055067	490.731239013871	-0.761271324013511	Smyd3
ENSMUSG00000066456	545.782957181934	-0.920445556733045	Hmgn3
ENSMUSG00000001131	418.534230537141	4.0574747108887	Timp1
ENSMUSG00000033389	508.600064969521	-1.31142358884837	Arhgap44
ENSMUSG00000034910	215.601863113782	-1.46071482133626	Pygo1
ENSMUSG00000042501	28.3065139946848	-3.8275615220256	Cpa6
ENSMUSG00000043510	262.662641011311	-0.998636087288874	Hscb
ENSMUSG00000021371	3225.10755687192	-1.06973377397085	Mcur1
ENSMUSG00000028426	9526.78222681928	0.594210453691448	Rad23b
ENSMUSG00000019139	1275.60459131202	0.882368185411225	Isyna1
ENSMUSG00000031149	113.821311793703	1.79030768709609	Praf2
ENSMUSG00000011257	2227.38523171748	0.65827339797007	Pabpc4
ENSMUSG00000028330	3934.56876847302	0.534393553001411	Ncbp1
ENSMUSG00000038415	1076.87042056522	-1.18542391719448	Foxq1
ENSMUSG00000022503	1377.81458987121	0.534474431434419	Nubp1
ENSMUSG00000041360	3513.23391304861	0.650702545527872	Pum3
ENSMUSG00000039676	60.8874011878525	-2.31274895919452	Capsl
ENSMUSG00000026083	5991.40865093813	0.431809156474118	Eif5b
ENSMUSG00000024331	625.55417663003	1.62921039962811	Dsc2
ENSMUSG00000019088	635.352197293116	-0.769809641228461	Dnase1l1
ENSMUSG00000038576	69.4985177729436	-2.09665759004137	Susd4
ENSMUSG00000029838	2103.80787976348	-1.60336408353299	Ptn
ENSMUSG00000020785	3101.34676732706	-1.28254937463832	Camkk1
ENSMUSG00000024589	1679.51193193531	1.18658484166356	Nedd4l
ENSMUSG00000026688	1576.03242902898	-1.03726674613913	Mgst3
ENSMUSG00000029161	141.392835289931	2.38233779238337	Cgref1
ENSMUSG00000030512	1708.07394878677	0.748412884192054	Snrpa1
ENSMUSG00000028435	69873.8571771204	0.872479079407374	Aqp3
ENSMUSG00000025492	10594.2676591219	1.3448206273245	Ifitm3
ENSMUSG00000000125	2215.17094135787	-0.981709435011969	Wnt3
ENSMUSG00000048277	6006.85386966978	0.780250615555019	Syngr2
ENSMUSG00000022724	1589.20766085283	0.880510589904151	Riox2
ENSMUSG00000062908	2567.70115055304	-0.901197897202958	Acadm
ENSMUSG00000031246	687.536793842409	-1.2362761439658	Sh3bgrl
ENSMUSG00000074743	6857.56469091786	1.07896603675129	Thbd
ENSMUSG00000021109	9412.42747638968	1.176121465398	Hif1a
ENSMUSG00000030662	7623.84561855801	0.527034913833801	Ipo5
ENSMUSG00000032221	139.962910240054	-1.57192138127147	Mns1
ENSMUSG00000029701	3298.0152045299	0.638555173085756	Rbm28
ENSMUSG00000105476	105.743905836979	1.78760788287578	NA
ENSMUSG00000022752	3150.44558319646	0.540457641423537	Tomm70a
ENSMUSG00000068893	32.2718592485599	4.10852852195526	Sprr2a2
ENSMUSG00000032373	11680.8052105168	0.891145412610784	Car12
ENSMUSG00000037104	889.26507817828	0.941104737848377	Socs5
ENSMUSG00000001768	3138.27353511324	-0.723901219837231	Rin2
ENSMUSG00000022629	5031.09113341891	-0.745189127003043	Kif21a
ENSMUSG00000041645	3183.40428246203	0.603377211241845	Ddx24
ENSMUSG00000046807	67.907617525882	-2.86701161766808	Lrrc75b
ENSMUSG00000060950	981.176053529198	1.0965180840602	Trmt61a
ENSMUSG00000021733	682.16037282902	1.18084671401601	Slc4a7
ENSMUSG00000020883	1765.24657285897	-0.926377118398297	Fbxl20
ENSMUSG00000033502	174.808842298202	-1.30594636573593	Cdc14a
ENSMUSG00000002984	4115.34723599691	0.711871375096233	Tomm40
ENSMUSG00000021097	142.7079244445	-1.58280106470988	Clmn
ENSMUSG00000003762	1195.24904617969	0.615249471249925	Coq8b
ENSMUSG00000057530	10820.9624946429	0.687703863665824	Ece1
ENSMUSG00000027566	5318.64704909595	0.520642189161522	Psma7
ENSMUSG00000078812	46243.1947314832	0.674570165735677	Eif5a
ENSMUSG00000022358	840.261989872923	-1.57150565669141	Fbxo32
ENSMUSG00000024771	46.7442873819883	2.97777431374765	Lipk
ENSMUSG00000037971	404.103523174966	-0.845339956776101	1110032A03Rik
ENSMUSG00000029480	1574.49663330515	0.825298005534603	Dhx37
ENSMUSG00000031605	941.680276365108	0.687444543226617	Klhl2
ENSMUSG00000033009	1158.88519049896	0.665286045244141	Ogfod1
ENSMUSG00000002409	699.538636345654	-0.819013498207581	Dyrk1b
ENSMUSG00000029570	696.155153326224	-1.54294114155868	Lfng
ENSMUSG00000060376	2369.07293180982	-0.692940078617215	Bckdha
ENSMUSG00000027333	3037.76679443367	1.39777589331595	Smox
ENSMUSG00000030062	7539.96809497897	0.709919607747275	Rpn1
ENSMUSG00000044068	193.0092472053	-1.2878593920658	Zrsr1
ENSMUSG00000026676	1990.9138757395	-1.49923462760973	Ccdc3
ENSMUSG00000028292	1486.71222996708	0.623612016806386	Rars2
ENSMUSG00000042156	562.771812104059	-0.836926248565784	Dzip1
ENSMUSG00000068328	3896.97376812123	0.471597095358443	Aup1
ENSMUSG00000023068	2532.33428203268	0.745894153505257	Nus1
ENSMUSG00000056209	2466.4696963135	0.830595225463715	Npm3
ENSMUSG00000039814	60.2870646266234	-2.06352063640172	Xkr5
ENSMUSG00000036053	1400.26078673363	1.70271978674243	Fmnl2
ENSMUSG00000003992	2135.41118052635	-0.480760778355424	Ssbp2
ENSMUSG00000005514	3316.72627227556	1.1034870175459	Por
ENSMUSG00000056305	1576.09629665675	0.571254295689543	Usp39
ENSMUSG00000005481	5240.71720068648	0.730779368385144	Ddx39
ENSMUSG00000032327	122.105805439144	-1.95525800738491	Stra6
ENSMUSG00000022383	117.112387682443	-1.73429314472045	Ppara
ENSMUSG00000024669	255.116893320832	-1.03685411425847	Cd5
ENSMUSG00000029166	2048.23762250657	-0.678503103061696	Mapre3
ENSMUSG00000040483	196.071263464908	2.62339121577104	Xaf1
ENSMUSG00000020873	2086.15191788152	0.709055218090155	Slc35b1
ENSMUSG00000058258	1844.36304232453	1.00941248393347	Idi1
ENSMUSG00000001510	822.184502625862	-1.4210922615677	Dlx3
ENSMUSG00000034175	440.103840471762	-0.823600647827765	Rhbdd3
ENSMUSG00000028741	2462.11239527142	0.744681489766465	Mrto4
ENSMUSG00000025915	1341.92006472861	-0.621879314910671	Sgk3
ENSMUSG00000087177	94.2248611071115	-1.41803807559863	E130307A14Rik
[truncated: 1,078 more rows]
